# Supplementary material for: Inactivation of NF1 Promotes Resistance to EGFR Inhibition in KRAS/NRAS/BRAFV600 -Wild-Type Colorectal Cancer
Source: Oxford University Press journal article supplement (doi:10.1158/1541-7786.mcr-19-1201), 2020-02-25
Supplement: 15417786mcr191201-sup-233972_2_supp_6087881_q5l2s3.xlsx [file 15417786mcr191201-sup-233972_2_supp_6087881_q5l2s3.xlsx]

## Sheet: S1_Antibodies
Antibody	Supplier	Cat. No.
NF1	Cell Signaling Technologies	14623
RAS	Millipore	05-516
Vinculin	Sigma-Aldrich	V9131
EGFR-Tyr1068	Cell Signaling Technologies	3777
EGFR	Cell Signaling Technologies	2239
ERK1/2-Thr201/Tyr204	Cell Signaling Technologies	4376
ERK1/2	Cell Signaling Technologies	9107
AKT1/2-Ser473	Cell Signaling Technologies	4060
AKT1/2	Cell Signaling Technologies	2920
GAPDH	Millipore	MAB374
Table S1. Details of antibodies used in this study.
