# Supplementary material for: Inactivation of NF1 Promotes Resistance to EGFR Inhibition in KRAS/NRAS/BRAFV600 -Wild-Type Colorectal Cancer
Source: Oxford University Press journal article supplement (doi:10.1158/1541-7786.mcr-19-1201), 2020-02-25
Supplement: 15417786mcr191201-sup-233972_2_supp_6087883_q5l2s3.xlsx [file 15417786mcr191201-sup-233972_2_supp_6087883_q5l2s3.xlsx]

## Sheet: S3_GI50s
	Mean GI50 ± SE
Cell line	Gefitinib (µM)	Cetuximab (µg/ml)	Trametinib (µM)	BYL719 (µM)
DIFI	0.050 ± 0.005	0.059 ± 0.005	0.044 ± 0.003	3.196 ± 0.535
NCIH508	0.298 ± 0.056	0.426 ± 0.163	0.041 ± 0.030	5.785 ± 2.854
LIM1215	0.870 ± 0.358	1.487 ± 0.520	0.726 ± 0.497	19.393 ± 2.069
HT115	1.050 ± 0.350	7.186 ± 2.995	0.085 ± 0.047	11.661 ± 5.674
SNUC4	4.047 ± 1.259	>10	>1	3.423 ± 0.860
SNU1040	>10	>10	>1	13.887 ± 1.949
DIFI-Cas9	0.077 ± 0.002	0.094 ± 0.010	ND	ND
DIFI-sgGFP	0.062 ± 0.005	0.072 ± 0.006	0.018 ± 0.005	ND
DIFI-sgNF1-1	0.245 ± 0.013	0.225 ± 0.017	0.025 ± 0.005	ND
DIFI-sgNF1-2	0.164 ± 0.018	0.161 ± 0.027	0.022 ± 0.005	ND
Table S3. GI50 values for cell lines treated with agents for 4 d. Results are calculated from at least 3 independent experiments carried out in quadruplicate.
