# Supplementary material for: Inactivation of NF1 Promotes Resistance to EGFR Inhibition in KRAS/NRAS/BRAFV600 -Wild-Type Colorectal Cancer
Source: Oxford University Press journal article supplement (doi:10.1158/1541-7786.mcr-19-1201), 2020-02-25
Supplement: 15417786mcr191201-sup-233972_2_supp_6087884_q5l2s3.xlsx [file 15417786mcr191201-sup-233972_2_supp_6087884_q5l2s3.xlsx]

## Sheet: S4_STARS_Output
Table S4. STARS output to rank genes based on positive enrichment of sgRNAs in the gefitinib- versus DMSO-treated arms.
p-value=0 means <1.52163274758e-07, FDR=0 means <0.000956041855305
Gene Symbol	Number of perturbations	Ranks of perturbations	Most enriched perturbation	STARS Score	Average Score	p-value	FDR	q-value	Perturbations
NF1	4	1;2;3;4	4	17.1476	8.49317	0	0	0	TCTCCATGGTGCATCAGCAC;TGGAAGTCCACTCCACTCAG;CTCCGGGGAGAACTCCGGCG;CATCTTCTTTCACCTGAACG
BRMS1	4	170;272;525;1627	4	6.71033	3.76214	1.36947e-06	0.00430219	0.00430219	GCCGCGTACCAGTCGGCCAG;AACGTGCCAGTAGATCATGA;AGGCCAGGAACGCGCCGTTG;CCACATGAGTGCGATCCTGG
RNF7	4	145;190;842;2443	4	6.00419	3.57405	8.82547e-06	0.0138626	0.0138626	TGCATTCCCACAAAAAGGGG;ACGGAACAGGAGACCAAATG;CAGCTCGGATGCATCCCGCC;CAGCCAAAAAGTTCTCCTCA
TBL1XR1	4	160;191;1191;2405	4	6.03142	3.48013	8.36898e-06	0.0175274	0.0138626	AAAGAAAGTCAGAAACCCGA;GAAAAAATTTGACTGCAGCA;TGGGGGCAATTTAGCAACAG;GTGATGTATTCATCTGAAAG
ARIH2	4	292;364;2539;3109	4	5.5854	3.03177	1.99334e-05	0.0250483	0.0232637	GTAGCTGACATATTGAGCAG;TAATAATGTTGCAGCCCAGT;AGATCCATTTGTCCTTGACT;ATTGATACTTACCCAGCACT
CTAGE15	4	9;1355;4761;5569	4	4.57277	2.74323	0.000214094	0.0747306	0.0741687	CAAAAGGCCGGATATTTACC;TGGCAAAATCATCACTACGA;GGGTGCAATTGAAGTCTCTG;CAAAACTCCTATTATCCACC
LZTR1	4	500;681;697;8316	3	5.53908	2.61916	2.22158e-05	0.0232637	0.0232637	AGGTGACCTCGCTATCGTCG;TGAGTGGCCTCTTGAAAGTG;TGGATGTGGAAAGTCCCGAA;AAGATGACAAAGCCTTCGTA
NRBP1	4	182;834;896;43843	3	5.21298	2.60244	4.91487e-05	0.0343113	0.0343113	CCCAGACAGAAATATCAGGT;CATTCGGGTTGTTAACATCG;ACCTCCGCTCCCAATCTACC;GTGCTGAGAGTGACTCGCCG
RPL10A	4	321;1951;3206;4149	4	5.08411	2.57534	6.63432e-05	0.0416834	0.0416834	CCCGAGGAGAAGGAGCGCAT;GCTGAACCTGAGCTGCAAGT;CTGCCAGCAGCCATTCGGCT;AGGAAAACCAGTTCTTGCAA
ZDHHC15	4	13;180;35265;73395	2	4.49127	2.55482	0.00025883	0.0774394	0.0744409	AAGACCTCAGAAAAGTGTAT;CATCACAAACAAAGTTAACA;CGTGCTCAGTCACTTTCAAT;GGGTAGTGGCATTTGGACAG
WASH1	4	1435;1438;2124;5368	4	4.63663	2.51742	0.000186248	0.078013	0.0723218	AGGCACTTAAAGCATTGTTG;GAATATGATGAGGACGACCT;AAACCACCTCTAGAAAAGCA;AGAAACTTTGACACTAGAGA
PCBP1	4	2216;2486;3301;3473	4	5.39306	2.42744	3.18021e-05	0.0285447	0.0285447	CTCCTCAAGTCCACAGACGT;GCATAGCAACCTGCTCGTCG;GTGTCAGCCAACAACAACAG;AGCACCGGAACCACGCCCGG
PRPF8	4	2484;2565;3034;3767	4	5.2519	2.40663	4.45838e-05	0.035015	0.0343113	GTGGCATGGCAGGACTACGT;GGACACGCCCAGCTTCAAGT;AATGCAGAGAAAGCTATCTG;TTGGACAGCCCAAGACATCG
ITGA7	4	259;1257;1272;57158	3	4.75858	2.36297	0.000139229	0.0624842	0.0624842	AGTGGACGGGCATACATCAG;ACCTACGGTTCAGTTACACA;CCTCCTGAGTCCCGTCAACG;AATGCGCATTTACTGACCGA
LIPT2	4	2581;2812;2956;4758	4	4.84619	2.3138	0.000112905	0.0591153	0.0591153	AGCACCATACCCGCAAACAG;GATCCGAATGGACATAGACG;AAAGACCGAGCCCCTAACAG;AGGGTGTTGAGTTGCCACAG
SUMF2	4	40;261;41945;50214	2	4.16944	2.28499	0.000697669	0.151154	0.144131	TGGCAGGAAGAACAATCATG;ATATCAGAAAAGTTACCCGT;CTTGATAGATGTTCTAACCA;TTATTTCTAACTAGACAGGA
KLF5	4	2707;3098;3640;4351	4	5.00153	2.27157	7.89727e-05	0.0451078	0.0451078	CTGGAGAGATCCTCACCAAG;TTTATAGTAGGATTTACACG;TAGGTGATATCAATGATACA;ATTGACAGCTATTCGAAGAG
TCEB2	4	2595;3248;3434;4958	4	4.77466	2.23655	0.000134056	0.0647902	0.0624842	CTCAGTGCCGTGTTTCTGTG;TATCGCCGTTCACTGGCCTG;GAGTTCACCCACGGTCATGT;ACAGCAATGATTGACACTGG
XPO1	4	1398;3565;3813;5443	4	4.61253	2.21145	0.000195682	0.0723218	0.0723218	CCCTTCTCGAGCTAACGTCA;TGGCCGTGGAAATGTAACCA;CATTTCGGACCGTAGACAGT;ACACCACTGAACTCAATACG
CSNK1A1	4	125;5247;5898;5978	4	4.44966	2.20996	0.000284089	0.0776057	0.0776057	AGACGTGGATAGAGTCACTA;TTTGGATTGGCAGATCATGG;GAAACCTTCGCAATAGCCCG;CAAAGGTCGGACTACAATCG
NUSAP1	4	32;546;7402;46575	2	3.53155	2.20357	0.00263821	0.285791	0.285791	TCACAGTTGCAGTCACACGG;CACACCACAGACAGCTACCG;AGTCATTAAAAAGTATCACA;GATTAAATACCAAAGCACTC
DNAJC9	4	1931;2596;3801;6251	4	4.37209	2.19079	0.000341302	0.0893501	0.0893501	TAAAGTACTGAATTGGCGCA;AGAGAGGAAAACTCTCCGAC;GACTGCAAATCTGACCACCG;ATACACTATCGATGTTGTAG
PTPN11	4	3144;3282;3479;5749	4	4.51751	2.1653	0.000242396	0.0761487	0.0744409	ATTACCTCTCAGTGACACAT;CCTTATTGCACTGTTGACGA;CTGGAGCTGATGCTATTGAA;CCCTGACCAATCTCTTACGG
H3F3A	4	1666;3830;4635;5636	4	4.552	2.12331	0.000224289	0.0741687	0.0741687	TTGCGATGACAACGTAACTC;GATCCCCAGTCAGTACTATG;AGCCACATCTGAGAGCGTCG;GTAGTAGACGAGGGTGAACG
FZD3	4	28;584;9058;52705	2	3.47354	2.10459	0.00300477	0.299666	0.299666	GCTGTGGCCAACGACGACGC;GAGCCCGTGCAAAAAGACGA;CTGCCACATAGGTTGCAAAG;ACGGTGGATGCTCGTAACCA
CLDN4	4	523;750;3562;24087	3	3.43022	2.0664	0.00334683	0.313853	0.313853	GTCTTGTCTGTTGACTACAG;TTGTGTCTATGAGTGGACCA;CCAAGACAATAGCATCAACT;TAATTGGGTTCCCATCACGA
PTTG1IP	4	109;346;53052;64761	2	3.92553	2.05895	0.00123983	0.194746	0.194746	TAGGATTTCAGCCATTATGG;GGGAACATAAAGACGTGAAG;CATGGGAATGCAGGCAACAT;AATAGCCACTGCTCCACCCA
SMAGP	4	71;433;46219;56342	2	3.73169	2.05618	0.00175596	0.250744	0.248911	TCCCACTCAACCAGGCACAC;AGGCCTTTAACTCTCACACG;GGAGGTACAGAATGCCGTGT;CTGGCAGCCCCACATACAGT
C19orf52	4	1654;2108;6770;7095	4	4.15207	2.04748	0.000722776	0.14649	0.144131	CAAACAAGGCTGCACCCTCC;GGCCGGCCTCGAACCACTCT;CTGGTGATCCCCAATGCGTG;TGTATGTGACCGCCTCCTTG
DAD1	4	2913;3836;4371;6498	4	4.30476	2.04436	0.000401102	0.100805	0.100805	TATAGGGACAGTACCGTCTG;GAGTAAAGTGTATTTCGCAT;TTCATGACTAGAACCAGTAA;CTTGGCTTGCTCTTAGGACA
DUX4	4	1783;3553;4980;7064	4	4.15968	2.03344	0.000709994	0.148696	0.144131	TCCCAATGCTCTGACCATAG;GCGCGAGAAGAAGACCTCGA;GCCGTATCCCGAGTAGTCGT;ACGCCGACATCGACGCCGCG
IARS	4	2980;4807;5052;5407	4	4.62406	2.03267	0.000191117	0.0750493	0.0723218	GGGGGCTTCGAAGTGATGAA;TAGTACGTTTCTGTAACCAC;GTCACTACTTCCAGACGCCA;ACTCCTTGCTTGTTCCCGTG
UTP23	4	473;529;5550;60292	2	3.55883	2.01078	0.00253884	0.295399	0.285791	CGGGCACACTCTGCGCATGT;TCAGGCCACAGACAAGCGGA;CCTGTCTCGAAAGAGCATCA;GCGATGACCTTCTGGCCGGG
SPRED2	4	136;2569;2986;32276	3	3.65666	2.00547	0.00209346	0.279856	0.264919	GCTGTGAGAAATACATCACG;GTGAGTAGGAGATCATGTCG;CTTACATAAATCACACGGCT;AGGTCGGAGTGTAGCGCCCG
RPS8	4	1426;4496;4998;7336	4	4.09405	1.99892	0.000815443	0.146384	0.146384	TACTGTCCTCGGACTACGAG;CAAGAGTGAAATCCAGAAGG;GAGGCTTGACACTCACGTGT;CTGCAGTGACAACGCCCAAG
POLD2	4	3726;3906;4707;6639	4	4.26747	1.9965	0.000581568	0.140538	0.140538	AGCAATGAATGTGGATCACG;GGTTGGCACATTTATCATCA;CGAGGTTAACCTCTTAGTGG;AAAGTTAAGCGTGAAATTTG
LOC100144595	4	990;1802;2064;27940	3	4.13246	1.98731	0.000757012	0.144131	0.144131	AAAAAAGCGGTCCTACACCA;GACGCGTCCGACCTCGCCAT;AGAACAGACACTAGATGCGG;GTTCCAAAGATCATAACGGA
TIMM10	4	3911;4483;5584;5852	4	4.48667	1.97076	0.000260656	0.0744409	0.0744409	TGATGGGTCCATGATAACCG;AATGCATGCGGTCTATCCGT;TATTTGCCTAGGTACCGAAG;CCAGAGTCCCACATTCCCTG
POLR2J	4	2267;4133;5858;6898	4	4.20099	1.95637	0.000655976	0.147196	0.144131	CCAGCTCATACCTCAAGGGG;ATCGCTTGTAGACTCCCTGT;AGCTCGATACTGCTTAACCC;TCCAACTTACTACATCAGGC
KPNB1	4	1985;3912;6721;6749	4	4.23893	1.94878	0.000611392	0.142273	0.142273	GAAGTGAAAGAAGCATACAT;CTGCCTAAAAAAGATCCAAT;GAGGATCAACACCATATGGT;TTCTGCGCAGGATGTGATGG
RPE	4	3107;4284;4848;7544	4	4.04548	1.94303	0.000895937	0.156366	0.153261	AAGTGACATGAACTGCATTG;GATCAACCTCCTACAGTCTG;TCCCACGGATGGATAGGTCG;TCTTAGGGGAAAAAGGTCCG
LOC100507462	4	1674;1703;2105;38260	3	4.10706	1.93884	0.000794597	0.146837	0.146384	GTTGTAGAAGTCCCAAGCCG;GGAAAACATCTACGACATGG;GGTGTGGAACGAGTATGCCG;GTTTCGTTTCGGGTAACAGG
MRPL50	4	121;1372;6036;29558	3	2.75785	1.92615	0.0143426	0.533222	0.524183	GGTGGCCGAGTTCTACAACA;GAAGACCAGGCGGATGAACT;TGGACGAGATCGCCATCCTG;CCCAGACAACGTAAATGTAG
PHF14	4	54;1847;6681;44561	3	2.62951	1.91819	0.0192076	0.553583	0.553583	ATTCAGGGGTAGGTTCAAGG;TATCGCCGAGTTCTACAACA;ATACCTTCTGGGGAACCACA;CATCTGACCCAAGAAACTAA
POLR1C	4	2672;4300;6366;7153	4	4.13793	1.90335	0.000746665	0.146603	0.144131	TGTCCTCGTCTGGATCTATG;TATGTGGACACCCTATACCC;GGTGTCCATGAACTACCGGG;TGGTGGGAATGACACAGAGC
KIAA0907	4	114;1329;6855;12420	2	2.76778	1.8992	0.0141335	0.544791	0.524183	AAGACAGCGATAATGGAGAA;CCAACAATGAGACCTACTGC;GGTCCACGCTCATGCACGTG;GCACTGCTACATCTTGAACC
GGA3	4	284;382;39679;59581	2	3.83996	1.89278	0.0013824	0.211845	0.211845	AGTCCCCAGCCAATCAGGAG;ATTGATGTTCCTAGGTAGCG;CAATGACGAAAACTATTGTG;TGTGCTACTTTATCACAGCA
RPL37	4	49;3476;4999;61537	3	2.99718	1.88806	0.00843198	0.47728	0.473625	GCCAGCGGGAGCACATCGGT;AGAGCAATTCGAGATTACCA;CGGTCACCTGTACACGACAG;GACCAGCTGATCAAACGTCG
CPLX3	4	246;439;48667;77187	2	3.7198	1.87331	0.00178274	0.248911	0.248911	TCTCGGGGTTTGCGTCGTTG;GTCTCAATAGGACATCAACC;ATCTTCTCCGAGAGTGTCAG;GTGCAGCTACCAATTAGACC
CHD1L	4	721;1349;3985;57642	3	3.28651	1.87068	0.00455851	0.367194	0.363768	GGGGGAACCTTACGCTACAA;AGCCCGAGAAACCCTTGGTG;ACAATGCCAGGAAAGGGCCC;CTACTTGCTCAGTCATCCTG
PDS5A	4	269;456;22902;25138	2	3.68699	1.84956	0.00186278	0.254432	0.254432	CTGAAAGGCTACAAGCTCAT;ACAGGCATTGATAAGTACAG;TTGGCATGGATGATCAAAGC;ATCATATCCTTGTAATGTAG
FBXO42	4	50;1084;13281;40925	2	2.94198	1.84359	0.0095872	0.478066	0.478066	ACCTATCACCGGATTAACGA;TGGCATTGAAGCATGTCGGA;CTGTGGTTTCCAAGCCTCGA;GCGCCGCCGAGAGATCGGTG
COPE	4	2612;5328;6529;7666	4	4.01761	1.83988	0.000951325	0.153261	0.153261	TGACAAGGTTCGGATACCCA;ACAGGAACGATGAAACAGTG;ATGTTTGCAATGACCGAGAG;AAGCCACAGCTAATCTCGAA
WDR25	4	26;3719;6949;30665	1	2.87238	1.83849	0.0112085	0.503021	0.492473	TTCTGCAGCTGCTCATAACG;ACATGGTGGCCAACGAGACA;CACCTCTTATCACCGGCAAG;ACCAGTGAAGACATATCCCA
DISC1	4	344;424;69742;75436	2	3.74983	1.83533	0.0017164	0.256766	0.248911	TAATGTGCATGACTGGAGAC;GAAAGCGCCTATGTGGTCGT;CCCCGACACTTACTCACACG;AAGCGCCCACACGAAATGGG
MIS12	4	219;565;8901;36452	2	3.50205	1.8174	0.00288928	0.297595	0.296327	GGAGCCCACATCACACATGG;TGTGCATCGGATGTTCTACG;TCAAAAGAACTTCTATGGAG;GAAGGTGAATAATGCCCAGT
TRAF5	4	1089;1430;3993;25904	3	3.28395	1.8144	0.00457388	0.363768	0.363768	TCTGATAGAGCAGAGTACCT;CAGAGTTGGATTCTTCCAAG;CTTATCCCTATATGATGCTG;CTTGTTGACAATATGTACGA
SIN3A	4	620;2106;3746;15133	3	3.36568	1.81187	0.0038015	0.331733	0.331733	TCACCTGGGTCATCTTCTCG;CGTACAGGGATAGCACAGCC;GGATTCCTATGTGGGCGACG;AAGAGCTACGAGCTGCCTGA
BMP7	4	234;560;29097;64634	2	3.50972	1.81045	0.00271474	0.289097	0.289097	ATGGAAGGAAACACGGCTCG;CTTCTACAACGAGCTGCGCG;AGCTGTAGCCTCGCTCAGTG;CAACAGAGAGAAGATGACTC
NXT1	4	256;545;31736;36315	2	3.53313	1.80537	0.00263273	0.290201	0.285791	TTGGCTGCGATCATGTAAGG;AGTGGAACACACGGGCCAAG;CACTCACTGTTCATCGTAGG;ATGCCAGCTTTGCAAACGGG
FYB	4	59;1145;18956;40339	2	2.89512	1.80406	0.0105642	0.491668	0.489381	GGGCCATGGCGTGTCCTACG;GTTGTTGAGATCTTGTGGGT;ATCGCAAGGAGACATTCGTG;GTGGCTCTGAACTCGTATGG
TCEB3C	4	324;498;15821;18254	2	3.61094	1.79759	0.00222676	0.274328	0.274328	CGTGGGCAAACGCTGCCCCG;AGCCGCGCCGACTACGCTGG;ACTCCTACGGCAAGACCTCG;CAAGAAGAAGTGCTGCTATG
NLRP1	4	5;38285;44986;64005	1	3.58803	1.79401	0.00244055	0.294884	0.285791	GGATCCGCCGCACAATCCCG;CAGGACATCAACAATGCCTG;GCAGGGCCTTGATCTCCGAG;GGCCCTAACTCAGAAGCGAA
NDUFA11	4	3463;5406;7214;7640	4	4.02351	1.79205	0.000937934	0.15508	0.153261	CGCTACAGGCAGGACCACAG;GAAGGTCTCGAAGAAAACTT;AGTCGTAGCCCTCCTTACGC;TGACACGAACGTGCTTGGGT
GOLGA6A	4	784;1189;5576;33334	2	2.86287	1.78176	0.0113722	0.496192	0.492473	GCTTACCACTGGGATAACAT;CATTTGCCCCGATATAGTCA;TACTGTTTGATCCACTTCTG;TGGGTGAACGTACATTAACG
NUP85	4	1060;2655;2994;18748	3	3.65322	1.77869	0.0021032	0.2753	0.264919	ACTTGACTCAGGTCACCTCA;CTACACGTGTGAGACAGATG;AAGAGATTATTGGCAAGGGT;CCGGTTCAGATAATCAAACA
UBE2F	4	415;475;36298;45805	2	3.65175	1.77587	0.00210822	0.264919	0.264919	CCAGTTGCTTAACGAATATG;AGTGGTTTCAAACCTAGTAA;ATTGCAGAAACCATGGCTAG;CCAAAGATCCACATCAACAC
EEF1A1	4	5071;5169;7219;7568	4	4.03996	1.77498	0.000906132	0.153871	0.153261	CCAGGACTGTTCATCCCTCG;AGGCACCCCCAGGAACATCG;TGGACAGTGACTGCACCACA;CTGCGTGCTCGAGTTGCGGG
EIF2AK4	4	695;3094;3173;47904	3	3.57861	1.77236	0.00247707	0.293649	0.285791	GTGCATGGCAAAGACTTCGT;TGAGGTCATGGTCCACGTAG;CTTCCTGTACCAGCGGTCTG;CACCTCATATGGGTCGTCCG
HSPE1	4	1709;2021;3273;10999	3	3.53877	1.75841	0.00260884	0.292702	0.285791	TGGGTCCAGAACACTGACCG;TAGGCTGAGGGTAAAAAGCT;ACAGTGCAAGGACAATTGCA;TTCCTGCATATGACGCACCT
TBC1D30	4	6;28026;48625;70986	1	3.50886	1.75443	0.00286432	0.299942	0.296327	CACAGACTGGTCCCCCAAGG;TCCCAGCTAACACAGCAGAG;TGGACATACTCAAGACAGAG;TCACCGTACTGTCCACGCCG
TXNRD1	4	747;1538;5256;34483	3	2.93341	1.75073	0.00970832	0.480294	0.480294	AGTGCCTGCTATTGACAACT;TATAACAGTCAATTTGAACT;AAAATCCCATTACCACACAC;AGTAAGTATGCTATGTCATG
ZNF260	4	797;1595;5030;69542	3	2.98932	1.75015	0.00852875	0.474214	0.474214	GAAACACGTTGTTCATATGA;GCATAATCCTCCAAGATTGG;ATATTCCTGCAACATAGGCT;TGGGTTCAATTTCATAAGTG
RC3H1	4	374;571;25126;30408	2	3.49295	1.73776	0.00292412	0.296327	0.296327	TGATGTGTGAAGTATCCTCT;CGTCTTTACATCTAACCAGG;AATGTCTTACCACATTGAGT;GATGGCACAGTTCTAACCTG
CDK9	4	1468;2848;2997;14869	3	3.65193	1.73008	0.00210564	0.269994	0.264919	AATGCCACCGAGGATCGCTG;GTACTACAGAATTTCTCACG;TTGGTGCCTCTGAGCGACAG;AACATCATAGATCACTCCGG
SNRPD3	4	1700;2123;3499;11136	3	3.4531	1.72713	0.00309318	0.303663	0.303663	GCGACGCTGCTTCTATTCTG;CAACCCCATCAACATCGTTG;AGCGTTTCGTGTCTATCCCG;CATGGGGCATGTTGAACACG
NFRKB	4	1448;2249;3550;72529	3	3.43455	1.72667	0.00332644	0.316667	0.313853	GTTGAGTATCGTGAGCACGT;GGGACACGTAATCGCCCCTG;AGATGGGACTCCATGCTCGG;AAGAAGACCAGTCCGACCAG
ZNF440	4	7;38915;64886;70525	1	3.44193	1.72097	0.00328886	0.317906	0.313853	AGAAAAGAAGAAGCCGACGT;GCATGTGCAGCCGAACATGT;AGTAGAAGCACAGCTCGGCG;GAGACTGATCTCTGCGTGCA
FDPS	4	1114;3182;3268;23110	3	3.54073	1.70762	0.00260214	0.297259	0.285791	AGGCCAGTGCGTAAAGTTTG;CCGAAGTTGTACCATCAATG;TATTGGAAGTGACATAAACG;GTGACTGCTCAAAATCGCCG
RRM1	4	2506;2729;2807;13254	3	3.73616	1.70647	0.00174425	0.254863	0.248911	TAATAAGAACTGCATTATCG;TGGCCCCAGAGCATAGATGG;AGCATCATACACCTGACCTG;TTAGACAACTGTCATTACAC
ZDHHC21	4	19;2966;48629;61201	1	3.00848	1.69928	0.00829549	0.473823	0.473625	GGACGCCAGGTGGCACCGAG;GCCCGTAGGACAGATCCTCG;GAAAAGCATCAACATGAAGG;TTCTACGAGCTACAATACCG
ARID1A	4	904;2203;4584;8428	3	3.10762	1.69812	0.00667951	0.423913	0.423913	AGGTGCTAGTTCAACAACCA;TGTATGACTGGGAGTATGAG;CAGCTCGACGCACGTCACGG;TGGAATTGACAACCGTTGAG
SRSF2	4	1360;2623;3625;65842	3	3.40775	1.69408	0.00344985	0.318756	0.318756	ATTTCTGGAATCGTCGCACG;GCAGCAGGATCATTATATCG;CCAAACTATTGGCTTCGCTG;CCTTGCACAGCAACATGCGT
CIITA	4	8;22816;57504;61409	1	3.38396	1.69198	0.00370594	0.337455	0.331733	GGGGGCCCCCTCGGTCAGTG;GCTGCGTACTGGAAACGAGT;CCTTCTCCTAAGGAGTGCGT;AGGACGGTTATATCGAAAGA
Non-Targeting Control-TAGGCGCCCGTAGCATTGGA	1	33	1	3.37046	1.68523	0.00377806	0.339108	0.331733	GCTTCCAGAGAAAACCCTCA;GTTTGTGCTGACAGAACGAG;CAGGTGCTCGATCTTCATCA;GTGGGCCGGTAGTAGAAGGA
RBM12	4	126;1195;65314;74316	2	2.85856	1.68241	0.0114437	0.492473	0.492473	CTGGGACGACAGTATTGTGG;TGTTTGTGTATCATGAAAGT;CCTCCTGAAGTACTTCACAA;TGATGTCAGGGAAGTTACGG
MRPL43	4	1804;2166;3915;33405	3	3.30919	1.68092	0.00426559	0.362172	0.362172	GGCGTATGCTTTGTACACCT;TTCGCCGACTCAGAACGTCA;CCTGGTTGGATCAAATGCAG;CCTCCGAAAACAGATCGCGC
HMGB1	4	239;3948;5192;8205	3	2.94899	1.6785	0.00934617	0.481328	0.475862	GCACCTTGCGTTCTCGAGAG;TTAAGGAGCTGTGCACGACA;TAAGGTCTGCACAATCCGCT;GGAGTGTGACTACCGTCGTG
CUL5	4	171;4059;5726;37187	3	2.82466	1.67779	0.0124543	0.514803	0.508429	TCTCTTCTAGGTAATCACAG;CCACGGAGATGATCACGATG;GTCGATGAGTATCTCGACCA;AGCTGTCTCCAGTACTACAC
FAXDC2	4	1877;1993;4282;17426	3	3.19462	1.66586	0.00548807	0.391836	0.381835	GTGGCCCAAGATACAGCCCG;GGAGAGGTTGGAAATCATGG;TGGAGGCAGGCGGTGTACCA;TTCATCATCTAGTCCCCGGG
ZGLP1	4	10;68004;71745;72463	1	3.28708	1.64354	0.00455668	0.371813	0.363768	AGAGGAAGAGGCGTACGGCG;GCTGCCAGACTTCGATGGCT;GGCCTCGTTAAGGATCCCGT;GAAGCACCTGCAGTCGCTCG
RAD9A	4	2365;2610;3735;13156	3	3.36945	1.62981	0.00378126	0.334615	0.331733	CGAATCTTCAACCCAGACCA;TGAATATGAATCTGAGACTG;GGTGAGCCGGAACTGCACGG;TGTGGGACAACATCACGTGT
HGC6.3	4	1692;3025;3793;39884	3	3.34971	1.62749	0.00389021	0.334824	0.334824	ACCCAGAATACATTAGGGAG;CTAGGCTTCTCTCGAATGAG;AAGGATCCCACATTTCATGG;GTCTACAAGTCTGTACAGGC
SF3B5	4	2053;2575;3977;42013	3	3.28908	1.62655	0.00439569	0.363397	0.363397	CAACTTATGAATTTGAACTG;TCAGTGAAATCTATGCAGTG;GAAGGTAAATCAGATCCTGG;AAAAGCGACAAAGTTCCAAA
SUPT20HL2	4	302;945;14181;74169	2	3.05959	1.62386	0.00729212	0.444819	0.444819	TGAGCAATAACAAGATCACG;GCCACGTTCCTCGCATTCTG;GAGCTGACGCTGTCTCACAT;AGGGATGAGAATAGACTCGG
PFAS	4	494;3525;5206;59533	3	2.94556	1.62326	0.00939152	0.475862	0.475862	CACTCCTACCCATAGTACTG;ATCTGAACTATACACCCAGG;TGATGGAAAACGACGTACTG;TTCAGCGCATTGCTACCTAC
LEFTY1	4	11;29526;45245;57748	1	3.2457	1.62285	0.00496676	0.385261	0.381294	TGAGCAAGACCTCGACAAAG;CTCTCTCGTAGGCGACCCGG;CAGCCACTGATAGCAAGTGG;ATCATCAGCCGAGGGCACGT
IRF2BP2	4	1844;2785;3966;11500	3	3.29263	1.62178	0.00437409	0.366432	0.363397	CCTGCTCAGACCCTATCACG;TCTCTTCCCAAGGATCGCGG;GAAGGGGTCTGGTCGAACCA;AAAAGAAAACGTGACCCCTG
Non-Targeting Control-GACCGCGTGAGATAACGTCA	1	46	1	3.22621	1.61311	0.00510751	0.386633	0.381294	TGACTGCAACAAATCCGAGC;TGATGCAGGCATAATCAAAG;GGAAAAAGACATCACCACAC;AAATGGTCTGGTGCTATCAG
TMEM132B	4	12;13107;23372;30930	1	3.20793	1.60397	0.00538658	0.38901	0.381835	TGGGAAAGCACAGTGGCCCG;GGTAGTGTTGACATTCGCAG;AGAGGAGGCTGGTCAGACAA;AACCCTGCAAACCCTAAGTG
SVOPL	4	1219;2393;5324;27639	3	2.91707	1.60196	0.0100872	0.491302	0.485141	GTCTGTGGTTGTAGGTTCCG;TGAGAGAAGACGATCTCCAG;GCGTGTGAGGATATGCACCG;CAGATACTGGCTAAACTACG
PTPRG	4	378;922;14295;27653	2	3.08073	1.59884	0.0070794	0.436077	0.436077	TGGGCACGTGAACAACCTCA;TCTTACGTACATCTCCCTCG;CTGGGGCACCCGCTTCAGAG;GAGAATATGCAGGTGTCCAG
RPS14	4	739;2597;6031;22502	3	2.7589	1.59753	0.0143163	0.535412	0.524183	TATCTGAATGATATAACCGG;CTAACAGAATCGATAAACAA;AACCCATTGGTAACCTACTG;TCCTTAAGGACACGGCAACT
STK11	4	636;2241;7155;7810	3	2.54313	1.59043	0.0233166	0.576764	0.566687	ATTCCAATAGACACAGGCAT;AGACAGTGCACATCCAACGT;CATCACTAGTGCTACGCGAG;TTTGGGTAATCAATCAGTGG
ARNTL2	4	563;792;14648;42374	2	3.21127	1.58573	0.00521737	0.385656	0.381294	TGTTGAAGGCATAGTCCACG;AGCCGGCAAGAACTACAACA;ACGGACGCGCATCAAGAGCG;CCTTCAAGATCATGTCACAG
MRPL20	4	2051;2757;4323;33266	3	3.18244	1.58569	0.00559109	0.381835	0.381835	TGCTGCAATCAATACTGCCA;AAAACCCAACTGATGTCTGA;CCTTCATGGCCCAAGATGGT;TAAGCACAGTGAAACCAGGT
CTAGE9	4	1259;2266;5992;70853	3	2.76711	1.5726	0.0141503	0.542111	0.524183	TGTCGGTGGTGGCTCTACCA;TTTGGGCTATCCACGCGCTG;AACCGGGAGTGAAACTACTG;AGGATCAATCAGTCCCAGTG
ATOH1	4	39;3231;16434;51131	1	2.6965	1.57155	0.0165732	0.550948	0.546539	GTTGCAGTGGAATTTACCAG;TACCGCTCAGCATTCAGTGT;GAAACCACGACTCAAGGGCC;TGGATTCCCGGAAAGCCTCG
NDOR1	4	14;14537;27042;43194	1	3.14102	1.57051	0.00622074	0.420268	0.414731	CCAGGACACAGACGATGGAG;GTATATGTTCTAGGTCTGGG;GACAACGACTATCTGCTACA;TTTCTCTGAATGACAATAGA
SNCA	4	716;753;12535;12811	2	3.25469	1.56626	0.00476864	0.374517	0.374517	CGACGCGACATCCAACCGAG;TCTGGCGGTAGCGCTTGACT;CTAGGAAGGCGAGCGAACCC;GCACCGTGCACGTCCCGAAG
ZNHIT2	4	1623;1775;6657;26956	3	2.63405	1.56494	0.0190749	0.55485	0.552667	GAGGAGGCTGATGCAACCCA;AGCTTCCAGACCACAGGTCG;ACCCGCGACCCGTCAAACCC;GAGAGGCTGACCCATAACAG
ZBTB11	4	290;1205;8768;34677	2	2.85144	1.56028	0.0117044	0.496883	0.496883	TCTCCACCAAGGAGCCCTCG;GGTGGGTCCGGCATACGCCC;TCCAGTATATGATCTCCGCC;GGCGGCGCCCATAGCTGTAG
CCL3	4	95;2148;7893;76505	2	2.36015	1.55698	0.0330388	0.593093	0.590357	TGCAGAGATAACCCTCAATG;GGCGAACAGTCTGATTTATG;GCTTATGCGCTACCTCCATG;TGGGATTCCAACCTACACGC
MAP4K1	4	15;31779;63580;67802	1	3.11107	1.55554	0.00663995	0.425702	0.423913	TCTCAAAGAGACACTTCACA;GGTATAAAAGTTTGGTCACG;TGGAGTCAATCCGATGCCAA;CACCAGCATTATAAGCAGTG
RPS27	4	2144;2577;4918;8311	3	3.01798	1.5543	0.00803909	0.463391	0.463391	TGCGCGCGACCACGTACACG;CGGCGACGTGAATGGCACGG;ATCTCCGTGGACCGGTACGT;TACCGCAGAAGCGCTCGTCA
TUBB2B	4	460;3546;6817;52972	3	2.60409	1.54426	0.0203613	0.571116	0.566687	CGGACACTCGAAGTCCACTG;TGGAGTTGTACTCCAGCGCG;TGGTCGCCCTTGTAGATGAG;CAGCCCCGACCCGACCATGG
OR2T33	4	16;26480;52698;73410	1	3.08306	1.54153	0.00705535	0.438899	0.436077	CACGAACTCTCTGCGCTAGG;GTGACTCCGGATAAGCGGAA;GCTTGAACTCACAGTCGTCA;ACGTGCTGAAGTTCAAGGCA
HOXA1	4	2544;3172;4291;28362	3	3.19193	1.53757	0.00551333	0.384892	0.381835	GGTATAAATTCCGGACATGG;TATTGAAGTACTGTCTGTGC;AAATGTGTGAAACCTAATGT;CAGCAACGTTCTGAACGCAT
COX6C	4	771;816;24248;62191	2	3.18561	1.53283	0.00556202	0.384024	0.381835	TGACAGAGCTCATATTGGTA;TTTGGATTAATTATTCCACT;CAGCTTTGGACGAATAAACT;AATTTGAAGAGGTTACAAAA
CLK4	4	285;1348;18905;27393	2	2.75566	1.53084	0.0145296	0.533857	0.524183	ACGTCACCTATGTTCTGCGG;CCTCAAACAAGCCTGGCAAG;TACCGAAGTCAATGTCGAGG;ACTCATCAAAATCTGACAGG
ZNF300	4	17;54795;61021;73503	1	3.05675	1.52837	0.00746833	0.451187	0.447564	GCACCAGGCTGCGCACACGT;CCAGACCTTTCATGGGAACG;GCGCCGAATGTACTCAACTG;GTGTGACTCCATCCCAATGG
SLC25A13	4	137;6938;7133;13160	3	2.547	1.52459	0.0231749	0.57781	0.566687	CCTGCCCTACCTCTCCCAAG;CAAGCTCGAATGTGACAAGT;GTGGTGAATTTGAGTTGCTG;CGGATGATAGAGTTCAGCTC
OSER1	4	242;1500;23909;25207	2	2.6646	1.52392	0.017689	0.552935	0.546539	GATGTTTAGAATCCAAACCC;GAGGACACTCTGAATCCACG;AATTACCACATGTAATGGAA;GTAATGTTACAGCCTTGGAG
SS18	4	22;5258;13848;60005	1	2.94486	1.52136	0.00954246	0.479642	0.478066	GCAGGGCCTGCTACCCAATG;TGAAGGAAACCAGTACACCC;GGAGGAGCTGTATGACGACG;AATTCTTACTGGATGTCTCG
TMEM63B	4	764;864;16135;45822	2	3.13651	1.51775	0.00626608	0.418828	0.414731	TTCCACTCACCTGAAAACCC;GAATGAGACTCACTCTAGCA;TGTCGGAGAAACCACTGCCA;AGGAAAAACTCCTGTTGATG
BCL2L1	4	2253;3867;4192;9040	3	3.22176	1.51598	0.00513931	0.384408	0.381294	GCCGTGGTAATAGTGGCTTA;ACAACCTTCAGACGACTCGT;CTCCCAGTCGGACAACCCAT;TCTGGACAAACGCAACGCTG
MYT1L	4	18;39423;57101;63384	1	3.03194	1.51597	0.00787764	0.462572	0.462572	TGAGTACCAGTAACAAAAGG;ATAAGCATAGTGACTAACAG;TTTGTTAGAATCTCCAGACA;ACCAGATTATACTCGTCCCA
SLC18A3	4	1011;2342;7541;35910	3	2.47706	1.51591	0.0270181	0.569647	0.566687	GCATCTCCCGGTCACGAACG;GGTGTCAGCATGATTCTCCG;GTGGGAGGAACACTGAACTG;GATGGGTGTGCAGGCCGATG
DPYD	4	254;1517;20202;45731	2	2.655	1.51379	0.0180933	0.546539	0.546539	CATGGACCGCTTGCAAACGG;GATGGGTGCACAGGCTGATG;GGTGACTGTTGAAGTTGGTG;TTTCTTCATAATGTGCACGG
RPL23	4	2922;3413;4228;21432	3	3.21083	1.51371	0.00521905	0.381294	0.381294	GCCTACGTGCAGATCCGACG;AGAGGAACTGATGCAATATG;GGATATTTGAGGATATTCGG;GTAGGTATAGGGATAGTGGT
PSMA6	4	1246;4344;4775;34726	3	3.05557	1.51056	0.00747959	0.447564	0.447564	AATCCTGATGGAGTCTACCT;TTGAACCAGACTCGGAAGCG;ATGATGAGGGTGTTTCCCCT;CAGGGCTGGTTATCGTCAGG
PPAT	4	1303;4113;5002;21672	3	2.99642	1.50234	0.00844278	0.473625	0.473625	ACAATAGTAATAAATTCCAG;TTTCTGTTCTATCGGTACCA;TAAATACCTGAGATTGACCA;GGAGACTGATAGTGAACCAG
KIF18A	4	1177;4518;4893;46030	3	3.02447	1.50067	0.00796803	0.463548	0.463391	GCAATGACCGGCCTTCGATG;TGTTCTTCGACGAACAGATG;GCCAGATAAATGTAAAATCG;CAAAGAAGGCCTTTGTACAG
PRUNE	4	3123;3691;4142;14106	3	3.2371	1.49775	0.00502869	0.385308	0.381294	TCTCCTGGACTGTAAGCGTG;GACAGTCAATCCTAGCACGG;GCACACGGACACGACCGACA;TTGCAGACTGACATTACCCA
OR4F29	4	1436;3941;5104;23898	3	2.97073	1.4947	0.00891159	0.474505	0.474285	AGATGAACAGCATATACTGA;GCTTACCATGAGCCATACGA;GTTTGGAATGAAGTTTCACT;CTTATTGAAGAATCCAGGTG
H2AFZ	4	356;4427;7547;33713	3	2.47606	1.49406	0.0270581	0.566687	0.566687	AAGGTGGAGATAACGCACTG;TAACGCCTGCAAGCTCACGC;CGGAACAAGCAGTTCCACAC;CCTGTCCGACTTGTAAACAT
SYCE3	4	20;12380;30335;68685	1	2.98622	1.49311	0.00871317	0.480218	0.474285	CCTTACCTGTTGACTCTACG;GAAAAAGGAACGGCCCACTG;AAAGTTGAGGTGACCCACTG;GGATAACCACTATTAGCTGT
CABP1	4	308;1513;22688;32630	2	2.65725	1.48693	0.0180321	0.549979	0.546539	GATGTGGTACTTCACCGAGA;TACATACAAAATACTTCTCG;CCATACTTGAGGTAGGCGCG;ACAGCCCAAAGCGTTCGGAC
KBTBD13	4	21;23101;49170;53393	1	2.96505	1.48252	0.00912736	0.477893	0.475862	GCTGGTTATAGGAACTACAC;TCAAGATTAAAACATCAATG;GATAATGAATGGTACCAGAG;GTCTGCGGCTCACTATGGTG
DOCK6	4	243;1769;60607;69716	2	2.52441	1.4766	0.0243817	0.575904	0.566687	GTACCAATGAGTGCAAAGCG;TGCCACTAAGAGGGTACCTA;CAATTTGACAGCTCATGTAG;GAATATCTATGGCAATATCG
VTA1	4	1175;3143;6744;71815	3	2.61767	1.47389	0.0196875	0.562257	0.562257	ACAGGCCATACACCAAACAA;GTACCTATCAACACTCATGC;GGAGTAAATCAGCCACAGCG;ATTGGGCATATTTCTCAGGT
CCHCR1	4	959;3358;6952;32956	3	2.57937	1.47171	0.0215553	0.573864	0.566687	GTTAATCCTTCGTCCAACAC;CCTACATGCAGACTAGCAGG;GAATTCATGATTCTGAACGC;CCACCCAAAATGGATTCCTG
FEN1	4	1729;2375;7232;35177	3	2.52966	1.47093	0.0240623	0.579248	0.566687	AACATGATTCTGGACGACGG;GATGATGTCAATACAGCCTG;GCGGGCTCCGAAACCCCGCA;CTCTGAGGAGACCACGACTG
HIST2H3D	4	1638;4202;5060;37567	3	2.98175	1.47088	0.00876582	0.478919	0.474285	AGTACCTTCTTGACTGTGCG;GGAAAGCAAGTGGTAGTCTG;TGATGATGAGACATCGCCCA;CGATAGATGTGTGAATGTGG
WDR77	4	1556;4056;5338;31692	3	2.91373	1.46635	0.0101376	0.489957	0.485141	GTCACCCCAAGTACGCCTTG;CAGAGGTAAAAAAACGACGG;TCCGCCGCCCCAGCGATACG;TTGGGGCACCCACGCAAACG
OR10V1	4	380;1472;39944;48047	2	2.68064	1.46473	0.0171307	0.549144	0.546539	TAGCATCTTCACTGTAAAGG;GGGTGTAAGGATTCCCACTG;CACAAAATTCAGTGCAACCA;AACGAAAGCTATGGCAACCC
C2orf27B	4	943;3870;6514;36389	3	2.66147	1.46468	0.0179125	0.551688	0.546539	TCTCCAGAACGGCTGCCACG;CTCACAGAAGTAGAGGCGCG;ACCGCAAGGCTGAGCCCGAG;TGTCGGGCACAGTCGTAGCA
SMG7	4	1613;3530;5811;8694	3	2.80598	1.46436	0.0129474	0.508429	0.508429	TGCTATATTTGGGATCGTCT;AAAAGCTTTCGGACTGCTGA;TTTCAGGGACATGATATCTG;CAAACTCCATGTATTTCTCT
FAM96B	4	3529;3923;4286;11053	3	3.19342	1.46279	0.00549796	0.388132	0.381835	CAGACCTGATGTCTTTAAAG;GAGCTCAGCAACAGGTTCCA;GAGGCTGGCCGAGATCAACC;ATGATCTCAGAGGTGACAGG
DTNBP1	4	23;30108;69655;73022	1	2.92557	1.46279	0.00995909	0.488851	0.485141	AGCACTTGGAGAGATACACT;TTTCCGAGCCTATGGCATCG;GCTGGCCCGAGGCCGCAACG;CAGCCCTCAGGATTGCGTGG
HES6	4	669;4838;6408;56680	3	2.6822	1.46037	0.0170869	0.553386	0.546539	TTCCGTGATTCAGCCACCCT;CCTTTATATTAATCGAGATG;CGATGGCCTTGTAGTTACAC;CCTCACACCAGACCTACGGA
FOXG1	4	244;1893;59080;64589	2	2.46699	1.45687	0.0277045	0.568848	0.568268	GTTGGGGAGCCGGTACATGC;CCCCGCCAAGACTATCAGCT;TTCAGCGCCCCGTAATCCTG;TGTAACCAACATAATCCAAG
SLC26A7	4	650;1162;54878;62973	2	2.88251	1.45583	0.0109046	0.496477	0.492473	GTGGCGGTACCAAAGCCTTG;AGTTCGAAGACTCCGGCAGT;CGCGCTGGCTGACCACGACG;CCCCGCTCACCGTTCCCGAG
MRPL57	4	1788;2402;7504;12239	3	2.48324	1.45356	0.0266319	0.576994	0.566687	ATCCAACAGCCAGCTATACT;TGTAGTGATGCGCGACGACA;AGAAATTGGCGTGTTAGCCA;GATCTGATAAGCTCTATCTA
CPT2	4	24;62555;70836;71799	1	2.9071	1.45355	0.0103754	0.49014	0.489381	TTCGGGTGGCCAGTCAAAGG;TGAACGGGGCATTAGTACGA;CTGGATGAGCTCGCCAAACG;GTATCATAGGAACATCGTCA
UBXN8	4	417;1466;22326;24499	2	2.68412	1.45264	0.0170377	0.554653	0.546539	GTGATGCCTCAATTAAGAAG;GCTCTTGGAAATACGCAGCG;ACATGAACGAGACCCTGCCG;GTACTCGCGGTACTGCACAT
RASA2	4	734;1124;11564;11920	2	2.91096	1.44819	0.0101814	0.488318	0.485141	AATCATTATTAACCACAACA;GCACAGAGAACAATGTACCC;ACATAAGTCCCTTAGTACAG;CAACAGCAGTACGCAAACAC
LECT1	4	200;2179;44715;70486	2	2.34807	1.44577	0.033751	0.593999	0.590357	CTGAACGCTGCAGGGAACGT;CATGCCCTGGAGCGTCCCAA;CATGTCTATCGTTATCACAG;ATATTATTCATCTGTGCCAG
ANXA2	4	25;62114;63000;63532	1	2.88939	1.4447	0.0107917	0.494923	0.492473	CATGGGCACAGTCGATGTGG;CACCAACATTCTGGACACGT;TGGTGCACGTACCATGAGAA;TGTTTAAGATCATCTCCACC
RPUSD2	4	222;2088;8231;42609	2	2.38407	1.44279	0.0319121	0.586269	0.585268	CTGGAAAATGAATAAGGTAG;AATGAGCAGAATCAATATGG;TGGCACCTATGCGCCTGCAG;CCAAACACTCACCTCCCATG
COG8	4	2452;4561;4629;15829	3	3.09516	1.44222	0.0067947	0.426911	0.426911	AGAAATCTAGCAATTTACTC;GGATCTCTGTACCACCTGGG;GGGTGTCAAACTTCAACCGC;AATGAGCAGAATCTATATGG
CTCF	4	119;2893;46178;64332	1	2.21337	1.44118	0.0421302	0.619916	0.61872	TTGGCTGGGTGAAATACGGA;TAGGTACCAAGTCCGATGAT;TGAAGGTTGCTATTGACACA;GATCCACATAATCTAGCTGG
RABGEF1	4	2719;2969;6003;12401	3	2.76479	1.4381	0.0141938	0.540482	0.524183	CTGGCCCTCGCTGTACACGA;GGCTCTCACCTGGTACACAG;CCCAGGCTGCATAGTTGGAG;TTCAGGGAGTTCCCAAACAG
NR2E3	4	942;1036;26454;37592	2	2.98077	1.43653	0.0087821	0.475672	0.474285	TCTCGTCTGGAGAATCCACG;GGGGGGTAGAGTCTGATCAG;GACCCCATGGACTACAAGTG;CTCTTGAGTACTTGCACTCG
PLP1	4	60;4217;25388;70480	1	2.50977	1.43606	0.0252008	0.57577	0.566687	CCACAATCTTGGGGACTGAG;ACAGATCAAAGAAACCCCTC;TGGTGCAGTAATGACTACCT;TCGAATCCCTTGGATCATGG
KIAA0754	4	85;3524;58226;60087	1	2.35892	1.43503	0.0332072	0.59273	0.590357	GCAGCTTTGGCTATCGCAAG;CTAACAGGATCTCATCACGC;TGCCAATGGAACCCACCCAA;ACTTGCCATGTGTACGACTG
COG4	4	2815;4239;4816;11634	3	3.04468	1.43113	0.0075934	0.450088	0.450088	TGAACACCCCTACTACTCGG;GCTTTATCCAAAAGGTCGTG;CTGTTGAGTCTTCAATAATG;TTCTACTATTCCAATCAACC
SLC7A1	4	51;4726;38542;76056	1	2.5802	1.42857	0.0215229	0.577899	0.566687	TTCTCCACAGGAGTTCTACG;AGGGAAGAGTCCCTGCTACG;GGAGGTGGTGTACGTCCTAG;CTGTACCCAGTAATCAATGG
ARHGAP21	4	27;14892;33063;39604	1	2.856	1.428	0.0116222	0.496752	0.496752	TCTCCCTCAGTATTTAGACC;TGGTGCTGATAATCGGAGCT;GATGAGGCCACACGCTACAT;TGGGGAAAATACATGAATTG
TSC22D2	4	1222;4190;6383;9594	3	2.68714	1.42784	0.0168159	0.550282	0.546539	GCAGTCAGCCTTCGAGTCGG;CTATCCGCTGAACCTGACGC;CGAGGTGCTGCCCCAATACG;GGGCAAGAACCCTTGCTACG
POLR3A	4	3840;4084;4554;21840	3	3.11599	1.42738	0.00645096	0.417849	0.417849	ACTCACCAGTCGCCTCGCAG;ATTGAGCAGTGGAATCCCGT;GGGCTCCGCGAGGAAAACGA;ATTCTTAATTTAGGCCAGTG
POLR2A	4	2676;3579;5528;14109	3	2.86931	1.42698	0.0112672	0.502071	0.492473	AGGAGACAGGAGATGAGGAA;CATTGCACAAAAGTTAACGG;TGATCACTCCAATTGACACC;TGTAGGGCTCTCGCAACGCC
PDAP1	4	690;1249;12490;41058	2	2.82079	1.42684	0.0125226	0.510905	0.508429	CCCCCTATATACTTAAACAG;AGAAACCAGCAAATGTCCTG;GCAGCAGTCTGATTCCCCAA;TTTAAGGAAACGCTATCTTG
RPL23A	4	3645;4308;4484;58724	3	3.13576	1.42619	0.0062708	0.414731	0.414731	AAGTGCGTGTTTGTTACCGT;GTAAACGACTCAGTACTGAA;GCGCCGACACACACGCAATG;TCGTTTATAACCACTACGAG
TMUB2	4	106;3272;26329;74550	1	2.26339	1.42368	0.038709	0.603495	0.603021	TGGTGATGCATCTCCGCGAG;TCACACAGACAAGAGAAGGA;TGTCTGCACATGTCCTCCAG;TTGAAGTTCACGGCACACAC
SUPT4H1	4	2826;4073;5086;8384	3	2.97523	1.42157	0.00884875	0.475185	0.474285	TGTGCTGGAAATGCTTCTGG;GTCCTCGGCCCTCCAGCCAG;TGTGACCGTCTACGACAAGC;CTGAGGACCCAGACACAGAG
LTBP3	4	2945;3655;5389;9344	3	2.90165	1.4215	0.0104599	0.490442	0.489381	TCTCCATCAACAGATACGAA;GGAGAGGGTTCATCTGATCG;CACAGCGCACCGGTAGCTCG;CAGGAAAACCATGCGCACGT
KCTD7	4	1035;1055;18074;57435	2	2.9652	1.41823	0.00898296	0.474285	0.474285	AGCAGTTGTAAATGCAACGA;ATCACTTCATAAGTGAACGC;CAAAGTACGTGTGATAACCC;GTAGGTGAGTCCCATATGCT
FXYD1	4	409;1672;27521;29002	2	2.57228	1.41812	0.0217943	0.572945	0.566687	CAAATAATCCACGATCAACC;ATTATTAATTGGATGTGACG;TCATAATCACCAAACATAGG;AAAATGCCAGTGACCCTAGG
TBCD	4	226;2286;21610;37446	2	2.30766	1.41476	0.0359265	0.598743	0.598697	TGGCGGGGCAAAGTCTATGG;AAGCACGGGCTGTCACTCTA;GCTAGCTAAAATCCGACGAC;ACAGACACCCCCAAAAGCGA
TXN	4	1377;3280;7534;24740	3	2.47823	1.4138	0.0269747	0.572575	0.566687	GGACAGCCATCTACCCGAAG;ATCACCATTAGATACACCCG;CTCCTGTTGAGAGATAACAC;GACTGTCTGATAACACCTGT
GPR78	4	306;1973;29844;46624	2	2.43195	1.41277	0.0296152	0.572531	0.571588	TGCCGAGTTCTCCTTCCATG;GACAGCGGCGGATCAGGACA;TGGGAAGCCTCAGTTCTCTG;TCCTTGCCGAGATTGTCCAG
TOB1	4	29;23924;46131;74144	1	2.825	1.4125	0.0124442	0.517795	0.508429	TGAGTGCTTTCAAGCGACCA;GCAACTGCACACATTTACCC;GAGAGCAAGGCATCAGACGG;ATCATTAGCTCAACACTCGG
ING1	4	213;2377;25104;61130	2	2.27481	1.41231	0.0379611	0.60078	0.60078	GGCATGGTTCACTCTCGTGG;GATGACATTCTTAGCCACGT;CATTGGCCTTCACCCCACAC;AGCTCTTCCAGGTGTCAACG
GPR75-ASB3	4	858;1183;11056;14847	2	2.86719	1.41171	0.0113009	0.500023	0.492473	TAGGTGGCATCCTTTAGGCG;AATGGTGTCGCGTACATGTG;AAAAGTACCTTTGCAAGACG;AGGCTGCACGGGTGAAAACG
SUPT6H	4	2010;4947;5147;46691	3	2.96006	1.41162	0.00919325	0.477365	0.475862	GCTGTGCACTATGATCGCTC;GCCTCGATTCACTCGCGCGG;AGACGTGCACTTTGAGCGGA;TTTCCCACCTGTCTCCACGC
FAAH	4	1746;4917;5425;58148	3	2.8932	1.41029	0.010593	0.489381	0.489381	AAGCTTGCTAGGGATTACAG;AATTCCGGTGTGGGTACCCT;ATCTTCGCACTATCCCAAGG;CCCACAAGGATTGAACATTG
HDGF	4	442;1658;8943;32234	2	2.57942	1.40946	0.0215521	0.576221	0.566687	TCTCAGAGCTTCGACCATGG;GGTCAAGGAGCATGTAGCCG;AAGCTGAGGTAATTCCCCGG;CCGGAAGAGCAAGGTCACTG
RAD51D	4	2607;3769;5728;57169	3	2.82422	1.40757	0.0124619	0.511751	0.508429	GGGGGCGGCTTGATCCTACC;GTCTAAAAAGAACCCCGGCG;GCAAGTCCATGTCTGCCGCG;GGAAAAGCTCGGGTCCGACG
ATP6V1B2	4	2354;4181;5545;17964	3	2.86541	1.40654	0.0113246	0.49757	0.492473	CAGTGATAAATCGGACAATG;CCCCAGCAGGTAATCCGGGA;CCCACAGGCCAATATAAACC;CGAAAGAACTACAGAGTGCG
ZNF615	4	340;1915;47120;72769	2	2.4572	1.40612	0.028243	0.568753	0.568268	GGTGCAGCTGACGATGTCAG;ATTTATGTGGTGCATTGGCA;ACGATACCAAAAGACCAGCA;AGATAACAGACTGCTAGAGC
RCAN1	4	30;8467;36301;46383	1	2.81029	1.40515	0.0128646	0.518132	0.508429	GAAGCAAGTGTACGTTGACA;CAGACGAGAACCGGAACTTG;AGCCATGAGAAACAAGCTAG;CACTGCCCGTTCTACCAATG
PCDHB4	4	353;1899;23645;39296	2	2.46431	1.40313	0.027811	0.569175	0.568268	CATGAGCTAGTACAACATGA;GCGGCGCCATCGAGGACCAG;AGCCCACTCGCAGTACTATG;GAGGCTGCAAGACTTCAACC
SKIV2L2	4	4196;4476;4544;12769	3	3.1188	1.40129	0.00642905	0.420768	0.417849	GGTGCACGTCTACACCCGCA;GAGACCCGGACCTATGAACA;TGCCCCGTATGAGTTCCCCG;TGCCAAATACAACCCTATTG
CDKN2B	4	31;16078;46490;47625	1	2.79607	1.39804	0.0132787	0.518198	0.517915	AGAGGGGGTATACCTGCATG;CCAGGTACTACAGGCCGGCG;TGTAGCCACAGCGGGTCACG;ACTGTCGCTGTTTACCAACG
SLC29A4	4	981;1168;41098;68731	2	2.87811	1.39665	0.0109749	0.496083	0.492473	TAGCTCCCAAGGGATTTGGA;GCTGTAATTAATCATATGTG;ATGAACCATCTCATTGACAT;GAACTATAATGATGCTACTC
BCL11A	4	38;6276;31597;67304	1	2.70777	1.3952	0.0161642	0.54897	0.546539	GACCTGAGCGAGGAGCCGGT;GGAGCCAGTCGAAGCCCGTG;GACAGGCTCCAGCTCCACAC;GTCTGACCTGTACCCCCATG
CAMK2N2	4	1098;3891;7711;37730	3	2.44907	1.39461	0.0288605	0.572021	0.571245	GTGGCCAACGATGAGAACTG;GCAATGCATGTGGAAGCAGT;GAGCACTGGCCCCACACCAG;GATTAAGTGCTGGAACGGCG
NUP205	4	3734;3990;5193;19234	3	2.94874	1.39291	0.00934709	0.477461	0.475862	CCACCAGCACTATGATGACG;ACAGAGTCTCAGTCACACGA;TAATCTGGATCGACCCTGTG;CCCACAGCTCCAAAGCATCG
DPH1	4	2442;4654;5353;23114	3	2.91017	1.39226	0.0101924	0.485141	0.485141	GGACGCGGGAGGACACAGTG;CCAGGACCGAGTGTAGCCCG;CTGACAGTGGATCGAGCGGG;GGAGCCGGTAGTACCGGCGA
POLR2D	4	2639;2958;7087;66864	3	2.55515	1.38935	0.0227702	0.576875	0.566687	GCTGAAAGAAAGCTTACTGT;AAACTTACTAGTGACCGAAG;GAGGCTGTATGGCCGCAGGT;AAAAGCTCTCTGTTGAACAA
PSAP	4	875;1269;44024;67697	2	2.80722	1.38898	0.0129295	0.510917	0.508429	CTGTTGTATAATCCAAGGCG;TAGTTACGTCATGAACGCTG;GCCGGCGGCCAGTATTACAC;GCAGAGACTGGACTACACCG
LOC100129697	4	41;6229;34612;70759	1	2.67482	1.3862	0.0174227	0.555669	0.546539	TTGCAATATGGATGTCAATG;AGATATAACCGGATTCAACA;GCAGAGAGATGCTCCACACG;GCAGCTTGAGAATTACATTG
ADAP1	4	936;1240;24947;70344	2	2.82697	1.38615	0.0122708	0.513981	0.508429	TAACGTGTAGATGCCATTCG;ACCAAACAGCGGAGCAAACG;ACCGAGTCATCGTATTCGAG;AAGAACTGAATTATTCACCG
FOXK1	4	1902;4204;6318;15370	3	2.70007	1.38528	0.0163487	0.5493	0.546539	GGTGCCCAGCTCTAGCATGG;CTGGATGGTGTAGACACCAC;GCCCTCACCAACATCGAGCG;GCTTCAGGGCCAAAACAGGT
SFPQ	4	2648;2835;7399;12258	3	2.50095	1.38434	0.0256696	0.573959	0.566687	GAAAACAGTTTGGACCCTGG;GGGAGGTAACGAGATTCAGA;TACCTGAACAAAGAATAACA;GAAGATGGCAACAAGATACA
PPP6C	4	427;1863;9048;10049	2	2.48052	1.3814	0.026878	0.576363	0.566687	CATTCTAGAAACGACAACCA;GATCAAACACGGCGTCATGG;GACGGGAGCCTCGATCGACG;TGTACTTCGTGATCATGTCA
PROX1	4	2691;3149;6959;19009	3	2.57811	1.38017	0.0215955	0.572508	0.566687	CATGTGGATGCGCTTTACTG;GGGGCCGTACACTTGCGTGG;GGATACACACCACTGCATGT;GATGAAGTTCGACTGAAGTG
CFAP126	4	128;3481;39937;71692	1	2.18186	1.3794	0.0444702	0.630714	0.628798	TATTGCTCAATGTGAAAACA;TGCAATCCTACTGACTCCCG;AGTGTGAAAGCTATAAACGA;TGAAGTCCGCTGTTGAAAGA
TLL2	4	212;2683;38798;64282	2	2.17318	1.37911	0.0450826	0.630856	0.629651	TGCGGTAGGGGCCCTCACAG;TGTGCTGGCGTTCATAATGG;GTAGCCACTTACATTGTCCA;ACTTACATGATCAACCACGT
VOPP1	4	1207;5413;6363;10486	3	2.6911	1.37816	0.0167199	0.550004	0.546539	CTTTGGCTGGCATCCAATGG;AGAGATTCCAATCGTAGTGG;TGTCCAGTAATAGCAATCTG;AATCTCACTAGCCCTAAAAG
FKTN	4	34;42100;59758;60629	1	2.756	1.378	0.0145187	0.536593	0.524183	GAAGCGTATCCGTTACGTGG;TTACAAAAATCCCCGCACGC;GGACACACCCCATAGTACAG;GTCAAAGCCGGATTGAAATG
KLK6	4	1006;4789;7343;22801	3	2.5105	1.37665	0.0250376	0.574128	0.566687	ATCTGAGCACTTGTTCACGT;GTGTTGGGAAACACAGACCG;GCTTCGACAAAGGGACCATG;GAGTAGACATACATTTCTGG
MST1R	4	434;1880;39050;48104	2	2.47282	1.37652	0.0273329	0.568652	0.567219	GTTCTTTATCAGACTCCACA;GTCAACGTCAAGGACTTCGC;GTCCTCGAGAAGTGCCGACG;TCGTATCCTGTCAGACACGT
BCLAF1	4	483;1794;27093;39301	2	2.5125	1.37454	0.024967	0.574606	0.566687	TGAAGAAATGAAAGGTCTGA;CATTCAGCCTAGCACTGAAG;AATTATAGCAAATAAAAGTG;TGTCAAAGGCGACGCCGCGG
ASIC1	4	35;51930;67724;68953	1	2.74343	1.37172	0.0149321	0.527069	0.524183	CAAGCAGCGCTCCACCTCCG;GGATCTTCTACTTCAGTGCT;CATAATCATGAAGAAATGAA;GTGCTTCAATATGTGCACCA
MED11	4	2890;3271;6826;67949	3	2.60243	1.37148	0.0204084	0.569894	0.566687	CCTCCCACTCACCTTAACCA;GGATGACCAGATGTCCTCCG;CAAGTACTTGACAGACGGAG;CAAGTCTCGCGCGTCCACTG
CYP2C9	4	203;2832;17677;60200	2	2.12796	1.37027	0.0488966	0.648138	0.648138	CGGAGCCGAGACCATAGATG;AGAAGCTTACCCGATCTTGG;GCCCACGAAGCTAGACCCCG;ATGCCTATGAGGAGATCGTG
FSIP1	4	76;4772;26451;52862	1	2.40738	1.36834	0.0308265	0.579888	0.578474	GTGATCGGGAGAATCTACCG;TAAGAAACGATGCAAATCCA;TACGCTGATCATTCCACTAG;TAAACGTATCTGATCGAGCA
EID2B	4	623;6144;7583;71089	3	2.47008	1.36693	0.0274446	0.567219	0.567219	TACATCACCAGAAAGCACCC;GCACTTCATGAAGCTAGTGT;AGATTGTACACAAATAGCAG;CATTGACCCACTAGACATAG
POLR2L	4	3208;4130;5769;13901	3	2.81517	1.36662	0.0126335	0.512105	0.508429	TGAATGAGGGTGATGCGCAG;CTGCAAGGCCAAGGGTACGG;TGGGCGGAGAAAGTGACTAG;CTAATCGGTCTGCGATATTG
OR51I2	4	36;16245;52227;75861	1	2.73121	1.36561	0.0153359	0.535309	0.535309	TTTGTCAAGACCGGTCATGG;GGTCCCAACCAGAAGAACAG;GGATGAAGACCCGTGCTCGG;AGCAGAACCTTAACACACTG
TTC12	4	357;2163;48658;60399	2	2.35428	1.36485	0.0333276	0.593193	0.590357	ATAAAGGATGGACTACAGTG;CATTCAGGGTACAAGTGACG;CTTCCCTAAATAAATCAGCG;CAGGCTACAAGTGACGAGGA
DNLZ	4	2847;3944;6198;47195	3	2.72433	1.36474	0.0154924	0.537781	0.536592	GAGGAGATGGACTTCGAGAG;GCGGGCACACTGAAATCGCG;GCATTTAATCCAGAAGGCCG;CTGCTGCTCGCATCCCAGCG
PRR5-ARHGAP8	4	93;4347;24659;46428	1	2.31999	1.36453	0.0353083	0.596349	0.595351	TCTCACATAGCTGCAATCAG;ATGTGCTGCCCAATGTAAAG;ATCACACACGTAACAACGAG;CTTTCAGAAATAGTGGTACG
KLHL28	4	232;2712;30985;45142	2	2.16417	1.36317	0.0458357	0.63433	0.63433	GGTACTCAAAGTCTTTGGGT;AGAAAGGAGTCTCCGCACTG;TTCAGGAGCTCATTGCACAG;GTAGGCTGCTCGATGAAGAG
KCMF1	4	2223;4203;6492;16869	3	2.66574	1.3612	0.017657	0.554695	0.546539	AGAGGAGTACAAGTTTCCCG;AGCCGTTGCATGTCTGACTG;CCAGACGGCAATCGACCAGA;GGACTCCGCGTCAGTCCAGG
THAP10	4	37;17203;37277;68234	1	2.71933	1.35967	0.0157427	0.540498	0.540498	GTATCTGGCATCATGACGGA;CCGCAGGACGAAGACGTCAG;CCCGCACGGTCATGTCGCCG;GGCAGGAGCCACCTTCGTCG
LRRC57	4	430;2013;15185;15291	2	2.41498	1.35856	0.0303805	0.574941	0.574941	ATCCGTCTGCTACTCACTCA;ATGGGGATGATAGACTCTGT;CAGTAGCATTAAGTTGAGTG;AGAAGACTGCACTACGATCG
SYT4	4	113;4010;21749;23609	1	2.23574	1.35847	0.0405565	0.608154	0.608154	AGATATTGAAGCAAGAAGCC;CTTGTTCACATCACCTGCGA;TTTGCCAAGATATATCTGGA;TGCATGTGGAAGATCAATAG
LRR1	4	3690;3720;6082;36553	3	2.74824	1.3583	0.0146876	0.524329	0.524183	CGCAGCGGCAGCCACGAGCA;CTGGCACGGACACTCGCGGG;TGATGCCTGGGTCTGCCCCG;GGCCGCCAGACCCAGCGCTG
RPS26	4	3261;3831;6266;11996	3	2.71053	1.35434	0.0159598	0.544975	0.544975	TATGTCCATTAGCACAGGCT;TTGGTGCAGACCCAGATCTG;AAGAATGAGACCCGCAGCCA;ATGGCATACCTTAATCAATG
LEMD3	4	908;5488;7480;74684	3	2.48726	1.35407	0.0264744	0.577565	0.566687	AGAGGAAGACTCGTTCTCAG;AGTCTGTAAGTCATTATCCA;TTGGAGGCTGCAAAATGTAG;ACATTCGGGTCACTATCTAA
MAP3K12	4	1678;5268;6297;69215	3	2.70428	1.35316	0.0162478	0.548845	0.546539	TGTATTTGGAGTAATAATGG;ATTGGCACAAACAGTTGGTG;TGTTTGATATTAACTTGACA;GACAGCAACAGAATCACTGA
C8orf86	4	44;6832;19612;63153	1	2.6442	1.35171	0.0186552	0.555501	0.552667	GAAGCGCCGGCATATTCCAG;GGCCACGGGTCTCATTAATG;GGTTACTTACATCGTGCAGT;GCCCCCGATGGACTACCACG
RPL34	4	2649;4504;6104;10061	3	2.74367	1.34937	0.0147887	0.524959	0.524183	ACATCTATTATATGAGCGCT;ACTGTTCCATGACAACCAGG;AATGCTATTACACTGACGGG;ATCCTCGAACAGAATCAGAG
YARS2	4	1961;4678;6631;21595	3	2.63899	1.34516	0.0187973	0.554477	0.552667	CTCATGAACTTGTAACGGCG;GAAGAATGCGATGTAAAATG;ACAGCACAATACCTCATGCA;ATAAATACTGTCCATTCATG
SLC16A11	4	1220;1266;14645;56109	2	2.80924	1.34349	0.0128913	0.515897	0.508429	GACTAAGAGGCCCGTCAGGG;GTCCCAGTGCAGGACCACGC;CCAGGCGCGTGGACTTCCCG;GATCTGCCTCATGATCGGCA
AGAP4	4	2802;4122;6509;8997	3	2.66244	1.34175	0.0178831	0.553496	0.546539	CAGCCATCAAGACCAAAGGT;GGTCCTTCTCTGGTAGGCGA;ACAGGGGCTGGGAACCGACG;TGGGAAACCAACCTTTGCCA
DPT	4	45;7073;43475;57878	1	2.63446	1.33941	0.0190677	0.557221	0.552667	TCTCCTAGTACTGGATACAA;TCTTCTGAACTCACAATAGG;CCACTGAGTTCAGTTGGCCG;AGGCACCCGTAGAAGAGGTG
UBE2A	4	803;1578;9749;64778	2	2.62146	1.33908	0.0195706	0.561472	0.561472	ACTGTGGCCTACCCTGCCGA;TTGCACGTCATACAGCACCG;AACCGAAATCACCTGTTGCA;TATGCGCCGGATCTCCTCAG
AP5B1	4	1235;5006;7521;38724	3	2.4804	1.33886	0.0268812	0.574471	0.566687	GACATCCAAGCAGACACAAG;TCTGTATGGCGGGTACATAA;CAGCTGGTTCTTGGTCCGAG;GTGAGCAGCTTTGTGGACCC
RTN4IP1	4	2285;3925;7228;22792	3	2.53035	1.33867	0.0240321	0.580744	0.566687	CCTGTAGCACCAGAGAGTTG;CATGGCATATATAACGATGG;AGCGACGAGTCAGTGTACCC;TGCTCAAGTTCACAACTCGA
SYNM	4	3707;4693;5572;38246	3	2.85925	1.33806	0.0114316	0.495342	0.492473	GCTGTATGATAAGCCAACTG;CAGACCAAGTACCTCGATGT;GTGGCTTCAACTTCTATGCG;GGCAACGCTGTGCTCTACGG
ATP2A2	4	2938;3839;6834;30468	3	2.60095	1.33643	0.0204582	0.568756	0.566687	CTAACAGTGTGGGCTCGATG;TGGCGTAATTCATCAAGTAG;CTTTAGAAAGAGTTTCACAA;CCTCGCCAACTATATGCCCA
ZNF708	4	120;4252;29902;69802	1	2.20975	1.3338	0.0423947	0.619455	0.619455	GGTATGCACCTTCCAAACGA;CATGCAGCCACTTGTACCAA;ATAGCACGCAATTCGTACAG;TGTTCAATAAGAAACGACCC
ZDHHC23	4	736;1685;45942;62960	2	2.5657	1.33272	0.0221483	0.572665	0.566687	TGTGAGGGCATATCCTCGAG;GGTTTGCTCCAACCAAACGC;GCATAAGGGGTGATACCCGT;GCAGCGGCATCGGCCCACTG
GNG2	4	42;27155;53020;56976	1	2.66437	1.33218	0.0178346	0.554727	0.546539	TATCAAGTATAAGAAGAACG;CTGTATAAGACAATAGAGGT;GTCCTTCTGAGCGAAATCGT;GTCATACCGCCTCAGCACCC
RPL8	4	2297;5363;6025;9140	3	2.76016	1.33211	0.0142887	0.537582	0.524183	TCAGCCGGCAGGGAAAACTG;GGAGCTGATCCACCGATACG;AAAATGGTACCTGGCCACTT;GATGTCCAGCTCGCACACCT
PSMB4	4	3428;3618;6945;12770	3	2.58064	1.32898	0.0213684	0.576214	0.566687	GGGCGACTGGACATCCCGAG;CATCTCGGCCACGATCTGTG;GGACGACGTGCAGGGCTACG;GCTGAGTTCAAACAGATACA
RBP3	4	43;13738;46580;65318	1	2.65417	1.32708	0.0182482	0.54858	0.54858	ACTTGCCAATTCATCATGGG;GGTGGTGGCTAATGCCGTAG;GAGTTGGCATGGGATAGCCG;GTCTAAGTTCTCACACAGAG
CGB1	4	3408;4540;6063;26856	3	2.7522	1.32585	0.0146042	0.530393	0.524183	AGACCCATCTGTGCGCAACG;GGACGCTGTGCAACTAACAT;ACCACCCAGATGATTGCCCG;CGGACATGTCACCCTATGTG
TRAPPC4	4	4064;4560;5801;8848	3	2.80816	1.32273	0.0129092	0.513346	0.508429	GCAATCAAGTTAGCCCAACA;TAACTTTCTGAGACTACTAG;AGGATCCTGTTGGATAACAT;CAGCTGGAATCATTTCGCAG
SMC3	4	4137;4682;5702;16924	3	2.82999	1.32121	0.0122164	0.51514	0.508429	GCAGGCACAGTAAATGCAGG;CCTTGGTCCTCCTACCCCCG;TCCAAGAGGTCCACAAAGTG;GGATAAGGTCTCCCCAACTG
ADAMTSL3	4	3104;3959;6928;49045	3	2.58373	1.32055	0.0212714	0.578563	0.566687	AGCTGGGCTACCTTATCCCA;TGAGGGTCCAGGACACCTCA;CCTGGGTTGGTATTCCGTGG;ATTGCGATTCTGGTCACGGT
RPS25	4	3825;4435;6056;15439	3	2.75366	1.32029	0.0145756	0.532432	0.524183	TAACAGCACAAAGTCACTGA;CATGGGAATACGGATAGCCA;GGCAGTGGAAGGTCTAACAC;AGCTGAATTTAACTACAGTG
DDX51	4	1105;6445;7136;47081	3	2.54647	1.31639	0.0231952	0.576028	0.566687	TGCACTAACTAACATCCAGG;GCTGCGAGTGCAGCACGCTG;ACTGGGGTCCGGGTTAACAG;AGAACCGAGGCAATCACCAT
HIST2H3A	4	2702;4264;7110;11061	3	2.55107	1.31048	0.0229092	0.578067	0.566687	ACAGCATATGTACCTAATGC;CTGGTCAGCTCCTTCGGACA;ATGCCGTAAGAAACTTTGAG;CCAAGAGCAGATCTTGAGTG
RRM2	4	3953;4661;6020;27154	3	2.76121	1.30905	0.0142694	0.540089	0.524183	GAAGCTTCATACCACACTGT;CAGCTCCGAAATGGCCGCAA;GGCAGCAGTTCACTATACTG;CACCAGTGAATTACTCCTCC
YIF1B	4	47;11477;64498;74399	1	2.6156	1.3078	0.0198865	0.565371	0.565371	ACATCAGCAGAACAAGACAC;TCAGTACCAGCAATCAGTGG;ATGAGGTAAATTAATCACGG;GATGACTCCCACAAATAGTG
EIF4G3	4	61;6793;56252;75243	1	2.50261	1.30601	0.0256112	0.578832	0.566687	AGACGGCAATGTCCGCCACC;GAGGGTCAAGGAATGGGCCA;GCACTCACCTCCACACACCG;CCCATCGGGAAGCGGCATCA
PMVK	4	1885;4927;7367;45002	3	2.50639	1.30546	0.0253259	0.57445	0.566687	GGGAAATCAGTGAGCACGAG;CCTGCCTAAAGCCGACAGAC;CGCACGCAGGTAGCGCCGCA;AATGTGAGAGTTCAACCCGG
TMEM65	4	66;6538;11811;24942	1	2.46848	1.30466	0.0276342	0.569265	0.568268	GAGCACATCCACGTACACAG;CCTAAAGCTCCTTGACAACT;GCTGCGCGCAGAGCTCCAAG;CAAGGCGGAGCCTTCAAACT
GRIN2A	4	48;12132;21051;48238	1	2.60648	1.30324	0.0202949	0.574383	0.566687	GTCTCCTAACACAAAGTACC;ATGGATACTGGAAGTAGTAG;AATGGGTCTCAGAATCCACC;AACTTGGCTGTGCTTCACCG
Non-Targeting Control-TACGTAAGTGACGACAGGAA	1	192	1	2.60567	1.30283	0.0203147	0.572365	0.566687	CCGGGATAGAGATTGGCGGT;CTCAAACCGGAAATACACCT;GGGGTTCCATGATACAAACC;TGCCCTCAGAAACCCGATGG
SLC7A6	4	526;2222;17600;65659	2	2.33159	1.30213	0.0346038	0.592413	0.591639	TCTGGTAGCCTGGTGCAAAA;ATTGGACTCAAAACAACCCG;AGTGGTTAGCTTCATTACAA;TCACCTGTTCGAATATGGTA
ASZ1	4	470;2356;56207;58066	2	2.28228	1.30167	0.0374719	0.603682	0.600585	CAAAGCTAAAGATGAGTCGC;GTGGTGAACAGGACCAGAGA;CCACCTAGCATGCCAGCCAG;CCTCCTCAGAAACAGGCTCC
TAF6	4	1843;4959;7510;10770	3	2.48223	1.30037	0.02667	0.575833	0.566687	CTGGTTATTATGCAGATGCA;AAGAGTTTCCCCAAGTCAAG;TACCTTCAATCGGTCAATGC;CTGGAAGAGATTCGTGACTG
ATOX1	4	895;1717;28708;75851	2	2.54972	1.29999	0.0229511	0.576807	0.566687	CCGCGGCTGTCAACTCGCTC;CAGGGATACGGCGCCCAGCG;ACCTGAAAATGAATCTCCAT;AAGTCTTGCCATGATTGGAT
BSCL2	4	3582;3833;7289;36689	3	2.51978	1.29777	0.0245567	0.575708	0.566687	GGTGGCTGATAATTACCTCA;GAAATAAAGCCTCTCCCAGG;GCTGGTTGGTATAGTCTGTG;GCGCCGGTCTTCGCAATCCA
HOXC10	4	892;1737;26311;57534	2	2.5399	1.29718	0.0234315	0.577333	0.566687	TCTCCGAGCCGCCTTCTACG;CACGCCAGCAGACATCCGCG;CATGGCAATCTGTAGCACAG;GGCAGGCCACAGTCACGGCA
MEI1	4	488;2359;24737;66265	2	2.28121	1.29598	0.0375084	0.602724	0.600585	GATGGTGAGGAAACCACCGT;CAGCACACACACGATAAGGG;TACAACAACCCCGTCCCCCG;CAAGCTGCCCATCTACACCC
HNF4A	4	3875;5220;5874;9223	3	2.79231	1.29572	0.0133538	0.517915	0.517915	GGCTGGCATCCTCTACGGTG;GGTGCGGCGGGAGTCAGTGG;GCTCAACAACAACACAACGC;GACAGACAGGCCAATGGACA
USP17L25	4	3130;4004;7464;44069	3	2.48995	1.294	0.0262282	0.576196	0.566687	ACCTACCACGTTGATCCCAA;AAAGAACACATACAGCCCCG;GAGGAAGGCCAGCGTCACGG;ATGGCAATCTGTAGCACGGA
DHX38	4	572;2201;21174;29675	2	2.33959	1.29292	0.0341079	0.590357	0.590357	TGGACAAGAACCCACCGCAG;TGACTACGATGAGGTCCCAG;GGTCACCTGAAGATGCGGTA;AGCTCAGGACCCCGTCACCA
TSPO	4	1260;1490;51253;60932	2	2.67029	1.29274	0.0175399	0.556581	0.546539	ACACCATAGTACAGGCAACC;AGCACACACCAAAGGCGCGG;GCAGCTCCAGCATGCCCGTG;CGGGAGATGAACTCTCCCCG
TBC1D3F	4	2917;5164;6544;42770	3	2.65567	1.29036	0.0180691	0.548445	0.546539	GTGGCGCGTTCAATCCTCAG;GCTCTGTTACTATGGACAAG;CCCAGGGGAATCGCTACGTG;TGGATCCCAAGCGAGTCAGA
RPL27A	4	3402;5059;6344;22614	3	2.69488	1.28973	0.0166185	0.549548	0.546539	GCATGGGCTTGGTATCCCGA;GCTGGCATACTGACCCAGTG;GGTCGGCGGGAATGCCAATG;ACCCAGGCCTGTTTCGACTG
PCID2	4	2754;6038;6068;28339	3	2.75115	1.28845	0.0146287	0.52823	0.524183	ATCCTTCTAGAAACATACGA;CATATATCCCAAGAACACGA;AGAGATGTACTAACTATGCG;GAAAACTTAGCACCAGGTGA
TRMT44	4	787;1910;8036;43033	2	2.45942	1.28789	0.0281505	0.572394	0.568268	TCTCGTGAGTCCTGAATACG;TGAATCGGATCCGACTACAG;GGAGGTGATGTATGCCTACG;AGGCGATTCGGATTGCACAT
CDC7	4	2271;5253;7068;24574	3	2.55853	1.287	0.0225214	0.572882	0.566687	CTTACTGTTTAGGCCCACGG;CGTCATTGACTCCACCGACG;TGCTTCCTCCCAGTATTATG;GATTTAACAAGAACTACAAG
SAA1	4	52;24317;29749;62435	1	2.57178	1.28589	0.0219424	0.574434	0.566687	GATAGTGAATCCACGCTCAG;TGATCGACTTGGTATCCAGA;TCATAGGTACCACAACTCCC;TAGGAGCCCCGTTCTCACAA
RNF38	4	615;2186;58009;67063	2	2.34536	1.2846	0.0338225	0.593595	0.590357	CCCGGGACAAGGAGCGCGTG;ACGAGAAGTTCTCCGAAGGG;CCGTTCGCGCTCCACCAACA;CATCGACATCTTCGGGCGCA
MDGA1	4	53;27410;30105;76671	1	2.56353	1.28176	0.0223595	0.571076	0.566687	AGTCATCAGTAACTAATGTG;AAGACCATATTCATACCGAA;AATTACCGGATGTCTTGGAC;ACATCGATACAAGCTCAGAA
ZNF830	4	3254;4354;7292;11299	3	2.51926	1.28049	0.024577	0.574041	0.566687	ACTTAGCAATTCAGTGCTAG;ATGCATTGCTTTACAAACCA;TTCAGTGACCTTCCCGACAT;CCAGAAAGTGTGGATTTGTG
SBNO1	4	2331;6290;6412;20321	3	2.68141	1.27917	0.0171047	0.551121	0.546539	GCTTGAGAGACATGAGAGAC;GGGGTGCAAACATAAGGGCA;TGCTGTCGGACACTATTACC;CAAGACCAATATACCAGACA
RUNDC3A	4	521;2430;13985;25113	2	2.25627	1.27838	0.0390746	0.604694	0.603316	AGCATCACTGAAGACCTCTG;AGCAACCTAAACGAAGAGGT;AAGCACGACAGATTATAACC;CCAGCTCATACTAATCGGGT
ZFP69B	4	755;2050;15311;26321	2	2.39959	1.27377	0.0311376	0.580527	0.580527	TCTCCAGAACAGCCCCCACG;AAGTCCTCGTACCTGGCGAA;AGGAAACAGTCCACCACGAG;GACCCAGTAACCATCATGGA
POLR2J3	4	55;15899;20104;20330	1	2.54747	1.27374	0.0231577	0.579681	0.566687	AGCCATACCTCTCATGATCA;TCATGGGACCAGAATCGCAT;AGGAGACTATAGTTGTCACG;AGAAATTCGGAGGTCTTCAG
EXOC8	4	486;2562;9933;55104	2	2.21185	1.27344	0.0421886	0.619325	0.61872	CCCCCAAAGACAAATCCAGT;GCTGACCAGTTACCCCGAGG;GGGCAGCTCCCATCGAACAG;AGACACGGGAGTTACCACCT
NFS1	4	4037;4486;6882;64910	3	2.59213	1.27266	0.0208689	0.577618	0.566687	AGTGTACCTCTTGATAACAT;CCAATGACTTCTGACACCCG;TGTGCTGGTATTCTCTTCGG;CATTGAGAGATATGGCATCG
CYCS	4	3712;4071;7540;12192	3	2.47723	1.27146	0.0270146	0.571491	0.566687	CGAAACCTTCTACCTCACGG;TCTGCGTTGAAATGGAGCTG;GCACAAACTCAAGTGCACAA;TATAACCAGAGACTCTTTGG
LRTM1	4	318;3218;47718;61879	2	2.02148	1.27044	0.0593712	0.679471	0.679299	TGGTCACACACGCCTCGATG;TACAGCCTGCAATAGTGTCA;GAGGGTCATGGACACAAACT;AACAATTTGCAGCGACACTG
DPP3	4	56;24879;29133;43795	1	2.53967	1.26983	0.023573	0.578551	0.566687	GGAGCCTGGCCAAGTACAAG;ACCTGTGAGATCCATGACGA;GGCCGCTGACAATCTCCCTG;TCCAACACCTCGTCCACTGC
NDNL2	4	2060;5536;7457;8025	3	2.49113	1.26928	0.0261786	0.577124	0.566687	AGACGCTGGGGAGGAAACGT;GAAGGTGGACGCCACCATTG;GCGGAACCAATCCTACCGGG;CATGTTCGAGATCCTCACGT
PHB2	4	557;2436;10966;27075	2	2.2542	1.26822	0.0392782	0.604865	0.603316	AGACGGAGGCGTCTTACCCG;GTTGCAGGCACCATCGCTCG;AGCCTGAAAAGAGTCGACAG;GCTCCACAGAAGGCGATCGG
ATP9A	4	465;2684;31013;41313	2	2.17286	1.26672	0.0450968	0.629651	0.629651	CTAGTTCTCAGGTCCTAGTG;GCGGAACCGAACCCTATCCG;AGCCCCACCTGAGATGTACG;GATGCTGGAAGAGCTACACT
RD3L	4	649;2272;48899;71250	2	2.31284	1.26616	0.0356461	0.59565	0.59565	ACCATCAACAGCTCACACGT;TACGACGAGATTCTCATACC;AGAAAAATAAAGGTTTCCGG;ATTGGTTATAGAGCTCCAAG
RDH13	4	57;36750;52348;67759	1	2.532	1.266	0.0239747	0.581595	0.566687	TGTCCGAACCTATTCAGGCA;ATAGGTGTTACAGAACATCC;GTCACACGAGTTGAAGAAGG;AGGATGTGCAACCCTCCAAG
TRMT112	4	2919;5747;6605;28095	3	2.64395	1.26589	0.018661	0.553052	0.552667	GTTCAGTGACGAGCAACTGA;GTGGGGCCAGATCGACGATG;GGGCCCAGCGATGTGCAGAA;CTCGGAGCTGATCTACACTG
C10orf142	4	150;4864;47465;65735	1	2.11335	1.26516	0.0501994	0.654363	0.654363	CCTGTTGACCATACCCGCTG;TTTGAATGCAAGATTGAACG;CACATCCCTGACCCAACCTG;CAGCAGAACTCTCACGACCA
CENPW	4	2294;5543;7302;58492	3	2.51754	1.26496	0.0246466	0.57142	0.566687	GTAATTATTAAACTCCGGGA;CTGCCCATGCCATACAACTG;TGAGTGCAAGATCGAACGTG;AAGTTGCTTCCGTTCCCGTG
RPS6KC1	4	432;2805;26315;43738	2	2.13597	1.2649	0.0481534	0.64647	0.644734	ACAGCTCTACGAACTCGACG;GCTGTGGCGTGAGATCACCA;ATAGACAGCAACCGACGGGA;AACTCACATGTCCTCGTCGG
HIST2H2AA3	4	184;4402;59115;74906	1	2.02519	1.26284	0.0590275	0.681746	0.679299	CTTCTCTAGACTTAAAGATG;GCGACACACGCCCATCGAGA;GCTGTCCTGAGGCCTACAAG;CCCCGCCGTACCTCTCGTAG
ADGRD1	4	1268;1651;30927;36441	2	2.58301	1.26277	0.0212965	0.576749	0.566687	GATATTGGACTTTAACAACA;CATGGTGGAATGTATCCGGG;CGAGCCGGACGATGATACCC;CTACTTGAACTACCCTAACT
ARHGDIG	4	714;2194;20282;49953	2	2.34228	1.26252	0.0340403	0.590815	0.590357	CCTGTACCCGAATAACCATG;GGACATAGAGGACTATTACG;GCACTGCTCAGTTCTCGTCA;ATATCTCTGAAACTTGCCAG
POLR3H	4	3637;6009;6081;33573	3	2.74844	1.26241	0.0146859	0.527265	0.524183	GTTGCGTCACTTCCGGATCG;GCGAATAGTGGCTCCAGACG;TTAACCAGCGCGTTTCTCAC;CAGAGCGCTAAGTTTCAAGG
SLC45A4	4	58;22495;25118;51346	1	2.52446	1.26223	0.0243735	0.577882	0.566687	CAGTACAGACAAACAGCGAC;TTATAAATTAAAGCTTGCTA;CACAACATACACCAGCCCAT;CCCTACAATAGGTTTCAATG
INSIG2	4	651;2303;13413;41585	2	2.30143	1.26192	0.0363781	0.599905	0.599819	ACCTACTATACTCGTCACAC;ATTACACATACATCTGACTC;TCATTACAATTTACGAATCC;ACAGATAATCAATGGAAGTG
ZNF7	4	732;2175;58163;61248	2	2.34962	1.26146	0.0335782	0.594286	0.590357	CCTGAGAAGAACTGTCAAAT;GGAAGTATGACAAAAGTGGC;TTTAATAGCAACAAATAGAG;GGATTAAAGTCTGCTACCTG
MRPS11	4	3348;5687;6477;66110	3	2.66866	1.26116	0.0175776	0.554975	0.546539	CTTGAGATCCTTGGTAGTAG;TTCTAAATCATCCTCTGAAG;AAGGGTAAAGTGCATAACTG;TGGTCGACACGACGTTATCG
BCL9L	4	944;1921;30709;50738	2	2.45455	1.26082	0.0284903	0.568268	0.568268	GATGTTGAAGCCCAGCGTTG;CATCCTGAAGAAGTTCAATG;GTTCCGCCAGTAGGACCGCA;AACTACTTTGAGAGCACCGA
CPO	4	108;5942;56306;60850	1	2.25531	1.25886	0.0392344	0.605675	0.603316	GCCCAACATGACGATATGCA;CGGCTGTAGGACTTCCACAG;GTTCAACGAGTTCGTGAACA;TTGTTGGCGATGACCAGCAG
BUB3	4	1881;6588;7244;10749	3	2.52757	1.25291	0.0241367	0.574436	0.566687	GGAGGAGGGATGCGACCAAG;GCAGCGAGCAGAGAATAGAG;AATACGATGGCCGAGCCACA;TTTAACGATCAAGTAGGCGA
TAF5	4	271;3731;8282;27078	2	1.89903	1.25251	0.0751554	0.726464	0.726115	TACCGCGATCACGTTGACGA;TTTGCGCATGTTGAAACCCA;CCTCCCGTGTACTTACACGA;CAAGGCCCTATTCTGGAAGG
GSG2	4	535;2632;13433;26819	2	2.18925	1.25228	0.0438013	0.626887	0.626887	ATTGCTGCTGATCTTTGTGG;TTGTTTGCAAACACAACCAG;TGGGAAATGTACCTATCCAA;ATTTCCCAGTAGGACCGAAA
RPL27	4	3379;6168;6326;9701	3	2.69848	1.25158	0.0163863	0.547634	0.546539	ACCAATAGCAAACTCCACCA;CCAGCAACTACGAGTATCTG;GGTCATAAGCGAAGTTGGCG;AAGGAGCACATCCTGCACGC
CCL19	4	1209;1761;27815;70514	2	2.52825	1.25108	0.0241157	0.576119	0.566687	AGACGAGAACGAGAAAATCT;AATGCCATACGTGAATTGGG;AGGAGCTAAAACTAACGCTG;GGCCCGAAGTAAGAGCACCA
NDUFB11	4	3766;5441;6649;26366	3	2.63557	1.25082	0.0188975	0.554826	0.552667	GGACAAGACCAACAGCTATG;GGCTTGACAAATTCTTATGT;ATAGCCAAACTGAAAAGCGG;TTGTTGAAAGAAGATAGGTA
ASCL2	4	976;1970;13751;15840	2	2.43324	1.24908	0.0295865	0.57374	0.571588	CGTGGTACCCCAGATAGACA;GCATCAACCTCATCAAACCA;CCTCCAGCGCTACTACCAAG;GATCTGGATAGCTCAGCGAT
SPATA32	4	62;38124;67413;69645	1	2.49556	1.24778	0.0260141	0.579599	0.566687	TCGGCCAAGATCGACCGCAA;GTCGAGCCCGTGTTTAGCGG;TAGTGTCCGCTACTGTATCA;GCAGAGCTACAGTGAACGCG
SLC46A2	4	428;3003;14570;49030	2	2.07903	1.24724	0.0533926	0.670931	0.668077	CGAATGGAGTGAAGAAGCCG;CTTGTACGAAATAGAAGACA;TAAGACAAAGACATTCCCAG;GCCCGAGGATAGAATCTACC
C1QTNF6	4	372;3230;41526;73812	2	2.01839	1.24701	0.0596806	0.679299	0.679299	GCTGTATGGGGACAACGTAG;GAGACTGACCTGATCGCACA;CAAAATAGGAGCTTGCGAGG;GGTTCCCTAGAGAATCAACT
MYEF2	4	84;7143;10170;12317	1	2.36405	1.24671	0.0329411	0.594738	0.590357	TCTTATCACCCCAACTTCCG;CACAGGGTGATGGACCATCA;TCCAGCCAAGCAGACGACCT;AGGTAAGGGCACGTGCATGT
PPIP5K1	4	320;3508;63141;72706	2	1.94994	1.2457	0.0681037	0.703776	0.703776	CCACTTGCCCACCATATGGG;AGCGGTACAGGTACTCACGA;GGTAGCCTTGGTCGTCCGTG;CCCTGCTCAAGCGAAAGCAA
GABRG1	4	63;53858;55168;56303	1	2.48863	1.24432	0.0264187	0.578359	0.566687	TCTCTGAGTGTACATCTGTG;GCAGCGAGCTTGTCAAGAGT;TTAAGGTATCAGATACACAC;ACTTATGGTTACCTGTCCTG
RFC5	4	3053;5688;7037;31403	3	2.56406	1.2437	0.0222023	0.569376	0.566687	TCTCCCGGATCTCAACCACA;GCCAGCGTACTGGTCATCAA;GGCTGCAACATGCTTCAGGG;AGAGGTCTCGTCGTGTGATG
PHACTR1	4	1028;1960;42661;58560	2	2.43755	1.24329	0.0293669	0.571245	0.571245	CATGACTACCACACACGCTG;TATGGAGAAACTAACTCAAG;TGAGGTGCATTATAGGACGA;AATGAACGTTCATACTGCTG
DHPS	4	1223;1803;10720;12727	2	2.50826	1.24283	0.0252658	0.575163	0.566687	TCTCATTCCAGGGGGACGCA;TCTGCTGAGCAGCGTCGCAG;GGCTGCGCGGAGAGACCAAG;CCCATCTGCTCTTCCCCGCG
CCDC171	4	178;4847;37626;73435	1	2.03949	1.24149	0.0574976	0.676512	0.674084	CAAAGAAGAGGCCCTAACCA;GAGAGCACGCAAAACAACAT;GATTCCACTCATATTCTACG;AATTCAAGTCTATGCAGAAG
USP17L28	4	4310;5365;6659;8199	3	2.63367	1.24093	0.0190878	0.552667	0.552667	CCACAAGGATCCGAAAAGTG;GACTCAGTCAAACCCAACCC;GGAACCTGGATAAACAGACA;TCGGACTGAAATAAGCGGAG
DDAH2	4	64;36854;42128;54121	1	2.48181	1.2409	0.0268227	0.577148	0.566687	CTGCAGCAAGCATTGAAGAG;TCTTCACACAGTCTACCCTC;ATAGCAGAAGAGATCTATGG;ACACCCGGTTAATTGTCACA
COX7A2L	4	130;5773;38744;58155	1	2.17516	1.23981	0.0449964	0.632466	0.629651	CTGCAACAGCTGATCGAGAG;GAGGCTTCTTATTGACGTCG;GAGGCGCAGGCATCGCAGAG;AAGCTTTGCCGCATTCACGT
DDX49	4	3701;5371;6979;30203	3	2.57449	1.23975	0.0217178	0.573332	0.566687	GCAACAAGTAGACAGTTGAG;TACACCGAGCTGCCTATGAG;TTTGGCGGATGATGGGGCGT;CCCAGAGCTATGACGATGAG
COA5	4	4024;5804;6527;55577	3	2.65895	1.23768	0.0179801	0.551067	0.546539	GCTCGACACCTGATCCGGCA;GGTCAGCACCCAGAACCCTA;GGGTCTCGGCAGGAACGGTG;CAAGGCTAATGTGCTGACTG
ATCAY	4	65;29806;51764;67923	1	2.47509	1.23755	0.0272287	0.568365	0.567219	TTGGCACAGAGAATGGAACT;GAAGACCAACAACCAAGATG;GCTTTGCCCCACGATCACAG;GCGCTAAAGTCCAATGACTT
EIF2AK1	4	1816;7249;7280;29154	3	2.52133	1.23616	0.0244987	0.5765	0.566687	AATAGAGTGGAGTGCCCAGG;CTGACACAAGCATTAAACAG;GAGAGTTGACACACTCCACG;ATGCATGAAGCTGCAATCCA
KANSL1L	4	497;2896;14655;77375	2	2.1093	1.23608	0.0505281	0.654573	0.654573	CCGGCCACCGCAGAGACCGG;CAGCGCGCGGATGTACTCCA;CGGCAGCACGTGCCGCACGG;CGCAACAGTTCCGGGGACGC
RAB3C	4	1087;1979;39819;66321	2	2.42938	1.23283	0.0298054	0.572684	0.571588	CTCCTCGAGCACCCTGACGG;GTCAACTGGGTGGAGCACCA;GGTGACAAGATCACATCCCT;GTGCTTCAGATGGAAGAGCA
FES	4	336;3597;8832;36641	2	1.92922	1.23182	0.0707844	0.711581	0.711445	TGAGATACCAGACACACAGA;CTTCAGAGACAGCCGCTCGT;CCATGTCACCAAGCTCGACG;AAGTGCTACACGTTCAACTC
KXD1	4	1614;1640;27635;51976	2	2.58869	1.23171	0.021114	0.579299	0.566687	TTTACAGCATCACCGCCTGT;GAGGAAACGACATTTGAAGC;CTGGAGTTCCTGCACCGTGT;GAAGCCATTCAGGTTACAGA
C15orf57	4	67;28795;30362;49866	1	2.46196	1.23098	0.0280448	0.572095	0.568268	ACCTCAATGGACGTTGTGGT;AAGCCTAACCCATCAAACTG;GTTCATCAAGAATACCCTTG;TCAAACTTCTTTCGCTCAGT
NUDT21	4	4289;4677;7542;49022	3	2.47689	1.22991	0.0270224	0.567831	0.566687	TCTCGGAGCTTCTCCTCAGG;TTACCCACAATAGAGACAGA;GACATCCAGTAGGTTCACAG;AACAAGAAATCCAAACAGAT
BIRC5	4	452;3112;11361;17495	2	2.04934	1.22958	0.0563278	0.671551	0.671551	CTACGACCGGCACCTTTGGG;CACAAAGTCCCGCTCACTAG;TCCTAATGAGCTCCCAGAGG;CAAACTGAACTCCAATGATG
SKA2	4	837;2291;11516;32675	2	2.30582	1.22806	0.0361143	0.598697	0.598697	CTGGGAATACGTCCACAGCG;CATTGGAGCGGACACGATCG;TACTCCGTATGGGTACGCCA;GATGGCGAATACTCTCTGCA
SYNPR	4	68;16444;63023;72549	1	2.45555	1.22777	0.0284418	0.570925	0.568268	AGGCTTCGACATGACATCGG;CAACCAAGGTAGACGCTCGG;CCACACTCACGGTAGCACCA;GTGACATGACCATCGCTGAG
PSMA5	4	4213;4657;7659;48085	3	2.45756	1.22755	0.0282296	0.570311	0.568268	GGGACCATATCACCAAGCTA;CATCCCCACTCTGCTTCGAG;CCCAGGACCAGGGAGACTAT;GTAAGGGCTACTATCTCAAG
OR11H12	4	286;3996;11849;65296	2	1.84256	1.22597	0.0841145	0.745404	0.74501	ATTTGCTATACACTGGACTG;CGGAAGGAGCGAGTGCACCA;GACACGGTGAGTCCCCAACG;TGTCTTGAACACAAATGGTG
GAPDH	4	2743;5831;7577;24856	3	2.47108	1.22576	0.0273938	0.568037	0.567219	ACGACACCACTACCACCCAT;TGACACGGATATAGCGGTCC;GGTGACAAACCTGATGCACG;GACATTCCTGCAATTAACCA
PCDHA12	4	831;2323;38867;60546	2	2.29415	1.22517	0.0367135	0.600705	0.600585	TGGGCAGCCTGACTGCGGGG;CCCAACTGGTCAAAGCACAG;GACAGATGCTAGTGTGCCAG;TGATCAACAAGAGTTGCTAG
LIFR	4	69;56225;62368;74243	1	2.44922	1.22461	0.0288572	0.573764	0.571245	ACACTAGCAGCATACATAAG;TGCTCGAGATGGTCACACCC;GACCAATGAAACATCTCCGA;CCTACTTACAGGCTTTAACG
ZNF43	4	236;4446;70591;72383	1	1.91798	1.22439	0.0724836	0.71606	0.71606	CCCTCCAGCAGGTCAGCCGG;GCGACATCGCCATAATGACA;TGAGGATTTACGGAAGCAGG;CGTCACTGGCCGCTACATCG
DHX8	4	754;2448;21579;38386	2	2.25007	1.22412	0.0395411	0.60447	0.603316	TCCCATCAAGTAGACAAACA;GTCGACGAAATAGTCAAAAG;TTTATTATTGTTACACAGAG;TCCGAGTGTCATAGTAAACA
HHIPL1	4	570;2827;36245;49870	2	2.12944	1.22337	0.0487011	0.646911	0.646911	GCCTTCGCCGTAGTACCCTG;ATTTGGGGACGGCACGACGG;GCTTCTAGACGACACCCCCG;CCAGCGAGTCGGTCTCATCG
POM121C	4	102;7017;31031;38834	1	2.28003	1.22334	0.0376755	0.602328	0.600585	TATCAGGATCTCATAGACCG;AGGATCCACCCGATGAATGT;TGAAAGACGACTTGAACTCT;GGTTCCCAAAGGAAGTTGTG
DCAF15	4	3653;5843;7009;24590	3	2.56909	1.22274	0.0220407	0.572238	0.566687	AAGTATCTGCTGTCCATCAG;GCGCCGTGCTAGGATCCCGT;TTATCTTCTGAAGATACACG;CAACTGTAAGGCTCCATTTG
AKT2	4	1456;1781;23343;60495	2	2.51867	1.22238	0.0246069	0.572612	0.566687	TCTCTTAGATGATTACCTGG;TAATAAGCAGCCCCCCCAGA;AGATGACCTTCTGACCACGT;AGTCCCTCCAACAACAGCAA
NEURL2	4	1173;1983;22522;62405	2	2.42768	1.22173	0.0298394	0.571588	0.571588	ATGTTCTTCCGTCAACTCTG;CTCTCCTCGGATGAACAAGG;CTCCACAGAGCCATCCAGCG;GATCGGCAGGAGTTCCCATG
NLRP3	4	70;18211;27099;56693	1	2.44299	1.2215	0.0292538	0.576182	0.571245	AGGAAGTAAAGACGGGTGTG;CAGCACTGATGGTGTAGGCA;TGCGCCAAATGCGTTCAGAG;TTGTTAGGGAGGCTAATCCA
SMC6	4	5691;5947;6210;43331	3	2.72188	1.21841	0.0155435	0.536592	0.536592	TGCAAGCCGAATCTGGACTG;CTTCCCAAAGCTTAACCCTG;CATACTTACGAAGACACACA;GAATAACCAAATGCAGCGGA
WWP2	4	111;6830;31043;48564	1	2.24346	1.2182	0.0400255	0.605976	0.60577	TCCTGTCGATGAATGCGTTG;GAATCCGTTGCAGTGCCGGT;CAGTATCCAAACGGGCTCTG;CTTGGCGGTCCACATTGCAA
DNA2	4	5830;6070;6106;62112	3	2.74325	1.21769	0.0149338	0.524183	0.524183	TGGGGGTGCATGTTACGCAG;GTGACATACAGCGTTTCCAG;GAGAAACGTACACCACCAGG;TCACGCAGGGCACATACACG
SLC11A2	4	3681;5474;7438;16707	3	2.49434	1.2164	0.0260583	0.576493	0.566687	TCCTACTTTAGACTTGGACA;CTCTTGTAAATACCATCTGT;CTTGAAAGACTCGAGTGTGT;CCAGAAAATATTCCCCGGTG
IL10RB	4	72;21690;48379;63066	1	2.43079	1.2154	0.0297706	0.573769	0.571588	CCGTTTCCAGAACTACATGG;TCAAGGCCGAGTACAAACGT;CTTCACATGTATGCTCATCG;TTGCCACGTGCAATACGGAA
HIST1H2AA	4	2280;6986;7437;69284	3	2.49451	1.21397	0.0260548	0.578453	0.566687	CCCTGTAGCACTGAGCAAGG;TCCCTGAACAGGATTATGAG;CAAGTAACCATACCAGACCT;TGTGCTCACCGTCTACGACG
AKR1C1	4	237;4626;23311;71113	1	1.91616	1.21301	0.0727356	0.717422	0.716892	TGAATCTGGTCGCTTCCGGA;GCACAAGTTTATAAATCCAG;AGTTGGTACATCACAAACAT;ACACCACTGTCACTCGAGCG
COX4I1	4	4218;5765;6999;21407	3	2.57088	1.21276	0.021978	0.572978	0.566687	GCTGTGCAAGCTGAAAGGCG;GGAATGTAGCAAATACTGGG;GAGCTGCTACAAACGCCCAG;CTCGCCTGCAAAGTTGCAGG
FRMPD1	4	73;54729;54846;72862	1	2.42482	1.21241	0.0300291	0.573474	0.573474	TTCTCTGTGGACATGACCTG;TCTCGGGTCCTCAATAAGCT;TCAGAAGCACGAGTTCTCTG;TCAATGCAGACCTTCTTGTT
SEC31B	4	74;37611;41329;43898	1	2.41892	1.20946	0.0302875	0.576655	0.574941	GTGTGACAAGAGCCTAGCCG;ACTGCACGTAGCATAGGCAC;TCTGGCCGCATACACCAGTG;CGATGTGGCATAGCCCGTCG
CYSLTR2	4	1112;2134;54267;69423	2	2.36567	1.20844	0.0327665	0.593291	0.590357	AATTTAGTCAGATTACACCT;AGTTCTCCATCGCTTAACAG;CATTCCAACAAAGAACGCGT;TACTACTTGAATCTGCCATG
GAB4	4	390;3628;45763;76141	2	1.92213	1.20819	0.0718016	0.713812	0.713812	GTTAGTGTGAGTTTATCATG;GCATAGTACTCCAACTGCGA;ATTCTCCCTAAATGTATAGG;ACTAGCAGTTGTAACGTGAC
CT47A8	4	994;2265;34766;56146	2	2.31544	1.20726	0.0354387	0.595351	0.595351	CCAACTAGCCCAGTTACCAG;TTTACTCCTAGGATGGGTAT;AAATGGCTTTGAACTACCAA;AAGGTCTGATGTGTTAACCA
IL15	4	75;24017;48077;70793	1	2.41311	1.20656	0.0305565	0.576536	0.576536	ATCACGCTACTACCTTGACG;TCTGCAGGGCTTAACTACCA;TATTATGTGACTCGACGAGA;AGAGTGAAGCGGATTACAAG
PDPK1	4	4640;5565;7209;50914	3	2.53366	1.20205	0.0237731	0.578939	0.566687	GCAACCAGTTATGATTACAA;CCTGCCTCTTACCGTGACAG;TGGTATTGTTGTCTACACTG;ATCCATTCAGGAGTAGTGGG
KRT16	4	77;25048;30854;37265	1	2.40172	1.20086	0.0310825	0.581225	0.580527	CACTCACGTTGTCACCAGAG;GCTCTCCATCCATGAGACCG;ACATGTGGGCGACTGTCATG;CTCGGATTCGCCAGTCAGGG
ATP1A1	4	5215;5697;6927;11157	3	2.58391	1.19982	0.0212688	0.581007	0.566687	CCCAGTGAACCGAAAGAACG;TCCAAGGACTCATTCTTGGG;CTTGGGATCATTAGGACGAA;TGTGGGCTTAAATTCACTGA
UBOX5	4	593;3020;60153;74644	2	2.07433	1.1994	0.0538853	0.669093	0.668077	AAGTTAAGGCTATGGGCGAA;GACGGTGGTGCCCAAATCGG;GATCATGAGTGAATACCTGT;TGAATGTAGATTGTCCCCCG
PRDM1	4	4517;5946;7031;26125	3	2.56514	1.19906	0.0221697	0.570871	0.566687	GTACACCAAATAAACCAAGC;GTTCAACTCGAGCAAAACAG;AGATAACAGAAGTACAACCA;GAGGCCACCTCGATTCTCGG
FKBP1A	4	5149;6222;6599;13440	3	2.6451	1.19865	0.0184878	0.553139	0.552667	GGCAAAAGTATTCAGACCAA;AGAGGGCTGGAATTACTGTG;GGTGGATTACCTCGTCACGT;ATTGATGAAAGCTCATTGAC
TMEM229A	4	1180;2150;25446;35933	2	2.35937	1.19813	0.033059	0.591765	0.590357	TCCCACCGACAAGCACACAC;TGTCTGGGAATTCACGCCAA;AACAGCAATGGCGAACTCCG;CTGGACCACGGTCATACGGT
TTLL11	4	78;25195;68679;74403	1	2.39613	1.19806	0.0313446	0.582657	0.582657	AGTTGGCTATAATCAATTTG;CAACAAGAGAAGGCACGCAT;GCTTTCACAAATAGTACCAA;GGAGCTGTCACCTTAGAACA
AADAT	4	79;26538;61487;74637	1	2.39061	1.19531	0.0316077	0.585814	0.585268	GGGGGCTTCACAGACCCTCA;GATCAACGCTGACCAACTGG;TGGCTATGCCTTCGACGTAG;GGGATGGGCCCAACGCACTG
SOX4	4	122;7137;10991;24874	1	2.20261	1.19312	0.0429143	0.625593	0.622687	TTATTGGTGACCGACAGACT;AGGATAGGCCTCACGACCAG;ACCAACTGGAACGTCCACAA;AAATTCGAGGAATGATACCG
PKNOX1	4	80;23412;30632;50949	1	2.38517	1.19258	0.0318855	0.587498	0.585268	GGTGGACGTCCAGTTTGATG;GTTGGTGAGAGGACCCGTGA;CTGCATAGTACCCATGTCAG;GCACCAATCAAAATTCCTGT
IGFBP7	4	874;2567;39026;51152	2	2.21022	1.19014	0.0422459	0.61872	0.61872	AATGTCCCGGGAGACAACAC;ATTCACTGGGCTATTCAAGA;CAGCAACTTCCCACTCCAGG;CAGATCCGCTGTTGTACCAG
PLGLB2	4	81;37494;40160;49743	1	2.37979	1.18989	0.0321425	0.587068	0.587068	TGCTCTAAAAACCATTGACT;TCAGAAACATACTGACCTGG;GGATAAATATACTGCCCAGG;GAATCCACCAGCTATCGACT
VIM	4	619;3068;34250;50617	2	2.06119	1.18896	0.0552033	0.66958	0.668997	CGAGGAACAGGGCGGAGTAG;GTAGGCCACACCGAGGAACA;CGGTCACTCACTGTAGCGCG;AACAGATTACCTAAAACCTC
CD300LB	4	1338;2092;33919;61597	2	2.38245	1.18854	0.0319508	0.585268	0.585268	GACGGCTGACCGAATGACAG;TACTCTGAACTAGCATCAAC;CCTCCGCAAATGGACTGAGA;TCCACAAAGAGTTTCTGTAT
CCK	4	849;2627;28955;35855	2	2.19085	1.18774	0.0437387	0.627421	0.626887	TGAAGAAGGGGAGCATCTCG;TTGCGTTTGCAGGTTACTAC;ACTTCTGGAGGTCAAACTGG;ATGCGGGACTTCAGTCCTAG
PSEN2	4	1063;2350;34760;62395	2	2.28442	1.1876	0.0372716	0.603551	0.600585	CCCCAGGAAATCATCCACAA;GCAGGATGAACAGTCCCATG;GCAAACACCTGATCAAGGAA;GGGAGGAGTATTTGTCAGAG
RPLP2	4	1543;1959;10811;52436	2	2.43798	1.18758	0.0293594	0.572874	0.571245	AGCTCTAGGGATCTCAGCAG;GGGAGGAACCAGCTCAACCG;CGTGGTGTAGTACCAAAATG;AGCAGCATTCACCAGTGCTG
EID2	4	902;2553;43556;46386	2	2.21481	1.18726	0.0419455	0.620102	0.61872	ACCATGATGAGTGTCCATCG;GGTCGATTAAGCAATACCCA;CTGATCAGATTGGTAGTGAG;ATACCGTATACCTGAACAGG
PRPH2	4	82;19607;34916;65765	1	2.37448	1.18724	0.0323995	0.590047	0.590047	GCTGACTGCATACCAGTCGA;GCCGCCAACGACAAAAACAC;CGAAGATGTCCCATACACAG;GTTACAATGACACCGCTCCC
FPR1	4	547;3298;18668;39147	2	2.00109	1.18642	0.0617148	0.686291	0.685222	GCAGCGGTAGGAGTAACCAG;CAGAAAAGCTGGCGAGAAGG;ACAACTTGTTGTAATTGGTA;TGCCCAGCGACACGGATGAT
IL2RG	4	1199;2233;34801;76207	2	2.32743	1.18528	0.0348518	0.591821	0.591821	TGAAATTGGGAAGCGTTATG;AGGAGAGCGGATCCCAGACG;GAGAGTGTATATGGTAGGGA;TCCCCCTCAATTCTCTGAGT
TMEM199	4	4408;5799;7523;54486	3	2.48006	1.18494	0.0268971	0.572864	0.566687	GCCGGTAATATAGATGCCCC;TTTGGGCTTCCGCTTTGATG;CCCAGGTTGGACCACATGAA;GGCCATCGGAACTACCATGC
BCAR3	4	83;16066;63781;75509	1	2.36923	1.18462	0.0326768	0.593376	0.590357	CAAGAGCGGTACCGGCATTG;TCGGCCGCCATGGTCTTCAG;CATTCAGGGAGTTGGCGATG;TGATGCCAGCCATGACCACT
ERICH1	4	1598;1955;12694;55837	2	2.43971	1.1834	0.0293246	0.57577	0.571245	TCTCGATGTTCATCTCGTCA;GCTCGAAGCTGCCTAGTGGG;TGGTAACTTCCTGGCCAACG;AGGCATGGTTCCTCATGTGG
SRP14	4	459;3658;11334;14728	2	1.91533	1.18273	0.072796	0.716892	0.716892	TAGGTGAGAAATGTGCTGAG;TAATGGCGTTTCGATCAGAA;ATTTCTGTGAAACGGCCCAA;GCTACGCAATAAACTATACA
EPHA1	4	1344;2140;11872;67596	2	2.3633	1.18154	0.0329589	0.593354	0.590357	TGGGGATATTCTCCGAACAC;TGCTGGGCTACCACACAATG;CTCTGATACTCACTGAGGCG;TCAATGTCGAATCTACCCAG
MS4A6A	4	1021;2450;23779;32513	2	2.24938	1.18152	0.0395617	0.603316	0.603316	GCAGACCAAACTACTCACAA;GTGTCCACCACACTCACGAG;CTCATCAGAGAGGCCAACCA;GAGCACCTCCTGGCAAACGG
DPH7	4	4087;6343;7398;24813	3	2.50112	1.17917	0.0256671	0.57595	0.566687	GATCCTAAAGAAGATAATAG;CAAAGCAGTGGAACTACTGG;GAACTGACTGGTTTAGCCAG;CTTTAAACGAGCCTTCATGA
MEAF6	4	385;4082;11210;19525	2	1.82508	1.17767	0.0870744	0.753565	0.753565	CGGCAGCGTACAATCATCAC;CCACCATGAGGAATCAGGCG;CATCTCAGATTTGCTCAGTG;AGGACCCAGAGGTCTACCAG
GOLGA7	4	202;5755;13913;31188	1	1.98496	1.17725	0.0636925	0.687595	0.686736	AGTACATCGCAGAGATGGTG;CCCGGTTTAGAAATTGCCTG;GGATGATGCCAATGTCATCC;CCGCCATCCCAATTTCCTGG
MAMSTR	4	86;16237;23534;35892	1	2.35386	1.17693	0.033472	0.59408	0.590357	TGAACAGTACCGCCTGCAGA;TGAAAACAGGAAAGAACCGG;GGCAGCCGAGAAGGTGTCCG;TGCCACGGGATCCCAATGCC
SPRR4	4	1054;2467;42153;71382	2	2.24357	1.17517	0.0398896	0.605378	0.605378	GCGACTGAAGCAGGCAAAGG;CAGAAGCTGCTGGATACCTT;ATTCGTGCTCTCGCTCTCTG;CCCAGGCCATGGGCTCCCAG
CFAP36	4	87;13109;26119;46805	1	2.34886	1.17443	0.0337198	0.595117	0.590357	CAATAGAGGCTGTATCACCG;AAATTCATAACAGACAATCC;AATTACAATCCATACCAAGA;CTTTACTCTCCATACAGGGG
NUBP1	4	5375;6049;7189;11918	3	2.53716	1.17362	0.0236579	0.578376	0.566687	GTTGTATCCAAAATTATCTG;GAAGGACAGAGCTCAACGGT;ACTTCGGCTTTACTGTAAAG;ATCTGCTCATACAAGAATCG
NHLH2	4	3823;6864;7327;21336	3	2.51324	1.17274	0.0249394	0.576082	0.566687	GCACCTCGTGCGGACCAACG;CCAGACCAATGTCATCCGCA;GCGTTCGAAGATGACCGTGT;CCACCACTACTACCTCTCGG
HSD17B8	4	88;44314;57237;73359	1	2.34391	1.17195	0.0339896	0.593213	0.590357	TCTCTTCTGACATTACAGTG;TCTCTGGCAGGAATTTGCAG;TTAGAAACTGCCATCAACAT;TCAACATAACAGAGACCATG
SRP68	4	5102;6683;6900;20621	3	2.58883	1.17126	0.0209693	0.577852	0.566687	ACTTTCCGTCCACTGTACCA;CTCCAGGCTCTCGATCACCG;CATCTCGGAACAGTAGCCTA;AATGCCGATTAACTTACCAG
IRF9	4	89;44845;56790;57323	1	2.33902	1.16951	0.0342538	0.591254	0.590852	CATCCCTGCCAAAACTCGGG;ACAATGAATTAGCTACAGGG;CCGGACTCATAGAAGCGCTG;CAATGATGTGTTGCACAATG
TRA2A	4	1357;2227;16642;59184	2	2.32969	1.16902	0.0346528	0.591639	0.591639	TCCTCCTTTAAGATCCGGGG;CTAGCTCTTACCATCTGTGG;CAAACTGGCAGCCCCCCGGT;CCACAATGTCCTCCCGACGA
RAN	4	307;4755;28667;38538	1	1.80495	1.16849	0.0908051	0.762739	0.7622	TAATGTGATTGAAATGCCTG;CGAGCACAAAAACAAAACCA;TGTCCGGTGAGGAATACGTG;CATACTCACATTCTACCATG
LRRC36	4	90;25583;60698;69891	1	2.33418	1.16709	0.0345249	0.592678	0.591639	CCTGAAAACTCACCGAAGGT;CTTCGAATGACAGTAAGACA;CCATATAGAAAATAATCCTG;TGCTTGCAAAGGAATGCGCT
PDSS2	4	602;3368;18514;34396	2	1.98367	1.16705	0.0637835	0.687396	0.686736	TCTCTAGACCCGATATCTTG;CCACCACCAACAGAAAGTCA;TAGAGGTACTCACTAACGGA;AAACGAGAAGCACTTACCAA
RPS23	4	1352;2258;55929;70305	2	2.31805	1.16564	0.0353697	0.595786	0.595351	TCTCCAGTGAATAAATTGGT;AGATTCTTCAGAAAGTGACT;GCAAGAGATACCAAATACTG;AAACAAAATCATCTGCACAT
C18orf63	4	91;33756;43180;50873	1	2.3294	1.1647	0.0347879	0.592337	0.591821	TCGTCCGCGCAGCAGATGCT;GTCGTTGCAGCAAACGCCGA;CAAGAGGGCCATGTCCGACC;GCAGTTCTGGAAGTAGCACG
TNS1	4	479;3846;29263;63925	2	1.87402	1.16289	0.079026	0.737772	0.737145	CATGAGGTACTCCCTAACAA;CAGATGGCAAGGTAGCTCAA;AAGCACTGGTAGCGGCCACA;GAAGTTGCAGAAGGCGCCAA
RNF11	4	92;10435;14010;44311	1	2.32467	1.16234	0.0350546	0.593661	0.593661	GGTATTTCCGCAGAGTCGCA;GGAGGTCATTGAGTGAGCCA;GACAGGAAGTCTCAGCCCAT;TCAGGGTCTCACGTATTGCA
HIST1H3B	4	1874;1957;11151;42272	2	2.43884	1.16163	0.0293419	0.574316	0.571245	AAGTAGAACTCCTCCAGCTG;TAATATGCAGCATGCATACT;ACTACAGAAAGCCAAACAAA;GTCTTCACTGCATCCTACAG
IGSF5	4	245;5502;10798;38562	1	1.90187	1.16155	0.0748117	0.725373	0.725373	AACACTAATGGGCATGAACT;GTACTCCAATAAGATGAGTG;GGCAATGAAAGTCTAGCACC;GTGAAATAGTTATGTCTGGG
STK35	4	312;4849;18985;29842	1	1.79802	1.16089	0.092109	0.763484	0.762891	TTCATCACAAACGCCGCCTG;GACCTCATCCCACAAACAGT;CAAGAAGCCAGTGAAAAACC;CCAGGAGAGCCAGCGACACG
WFDC2	4	474;3920;16672;27529	2	1.85834	1.15916	0.0815248	0.740203	0.739053	CCAGAGCCCATACCTGGCAT;CGAGCTGTACCAGCGCGTAG;CGATGACAACACCTACAGCC;TTCCGCTGCTCGACACCACG
ATP7A	4	672;3288;12575;73174	2	2.00361	1.15817	0.0614338	0.689265	0.685222	CAACGCAGGGAACCAAACGG;GGTTCCAGTATGCCTCGGGA;CAAGTAATTCAGGATGTGAT;ACCTGACCTGAGGGTCACGT
POLR3B	4	416;4216;20693;28330	2	1.79861	1.15782	0.0919293	0.763001	0.762891	TTCCGGAATTAGAAGGACGT;TGGATTGGTCGTGTTCATCG;CTCTTAAGCACACCTCAGCG;GGAACTCCTAATCCACTGGA
TUBA3E	4	94;39467;53953;54523	1	2.31537	1.15768	0.0355721	0.595999	0.59565	CTGCACAAGCAGGACGACCG;GTAGTCGTTGGGATAAACGA;CCCATCAGACACCCCCATGG;CCGTACCGTCCCTCGCCGGG
GSTA1	4	258;5458;36691;42126	1	1.87964	1.15628	0.0781681	0.734126	0.734126	ACCCACGAAGTAGTTACTGG;GGGCTATCTAGAAGCCCTCA;GGAGCATCCCAAGCATCTGG;GAAAATCCCAAAGTGTCCAG
RPS13	4	1547;2209;16393;39641	2	2.33654	1.15342	0.0343245	0.590852	0.590852	TACTTCGTCTATGTGGCGCC;CTTCTGATTGCATGCCTCGG;TTCGGAGTGCTTATGCCAAG;ATGGATGTGGACAGATGCCG
EIF4A3	4	1883;2011;10086;11527	2	2.41582	1.15332	0.0303613	0.576314	0.574941	GATTTAGATATTGAGCCAGG;CTCTTTATGGTACAAGCTCG;TTTCAATGTGGGCTTCAAAG;AGCTTTGCAGCAAAATGACG
NCCRP1	4	96;22695;40419;73490	1	2.30626	1.15313	0.0360921	0.599911	0.598697	GGCAGCTACAGAGCTCGCGG;TGTCCGAATTTGGACCTCAG;GGCCGGCTCCTGAAGTGTTG;CAAAAGCCACGAGTTTGCAC
TFAM	4	1760;2081;10411;17794	2	2.38691	1.15275	0.0317075	0.585936	0.585268	CCTCATAATACCACTCCCGC;TACTACGTGGAGATGACCGT;GTGTATGTGCCCTACACCCA;GAACTTGTCTGATTCAGTGA
PI16	4	229;5933;52108;58712	1	1.93093	1.15114	0.070654	0.713696	0.711445	TCCAAAATAGCCAGGACATG;CACCTCATCAATAATCCTTG;TCAACGCTAAAGCCAACGAG;CTGACTGCAAACCGTTTGAT
PIN4	4	97;34324;61471;66205	1	2.30177	1.15089	0.0363684	0.601323	0.599819	TGCATCCTCGGAAAGCGGCA;GTATTTCAATCCGGTGTGGG;CAGCAAGTTATCGGCTTCAG;CTGGATGCTCTAGATGTGTG
PRR32	4	209;6241;36960;56291	1	1.97029	1.15085	0.0654967	0.692788	0.692788	GACCTTACTATCCCGGATGG;CTCAGCTGAGGACTCGACAT;GAACTGAAGATCAGCCATGG;GCACCTCGACATACTCCGCA
ZNF175	4	1330;2415;24675;47006	2	2.26147	1.14903	0.0387746	0.603021	0.603021	CAACCTCCAGCTCACCACAG;TGGAGGTTGGAGCCTGAAGA;GGACTCCTCCTTCATCAGCC;ACTGAAATCCTGAAAGGTGT
NBPF8	4	98;34516;42479;42757	1	2.29733	1.14867	0.0366216	0.600766	0.600585	CTGTGGCCCCCCATGTACGG;ATGGCTGAGACCTCGTCCGG;CGTGCACTCTTCTAACCTCG;AGACTCCATAGGGTGCAGCG
THG1L	4	305;5172;22698;59670	1	1.80775	1.14675	0.090294	0.759461	0.759461	CAGTAGCACGATCACGGTCA;ACAGGCCATTGTAGTCGGCG;CAATGGCAAGAACTATCCCA;CCAGCGTGGGTAACAGACAG
RGPD6	4	99;29495;56711;76300	1	2.29294	1.14647	0.0368835	0.601919	0.600585	GGTGTGACGTATGCAGCCAA;CGAGCTGGCACCGTTCGTGG;CTGATGGCGTCGATGTACTG;GGGTCACGCTCTTGCGCACG
DPF2	4	309;5160;19030;27773	1	1.80216	1.14552	0.0913164	0.764988	0.762842	TTTCTGGTTGATAAGCACTG;ATTTACCCTTTGTGAATTCG;TGCGAAATTTAATAAACCTG;ACCCAGTTCAGTTGACACGG
EIF5A	4	1389;2400;9887;10980	2	2.26671	1.14483	0.0384757	0.60135	0.60135	GCTCGAGTACCGCCACCGAG;TGCAGATGTCTGACACCCAG;CCGCTGACTCTCAGACACGA;GTCCACAGCTCTGTCCGAGG
OLFML2A	4	100;32056;73882;75191	1	2.28859	1.1443	0.0371481	0.603104	0.600585	GCTCACCTGCTAGGTTGCAG;GGTAGACGTGTAGGGCCAGA;ACGGCAGCTCGCCATCATCG;AAGACCCTTACCAGAAGCAG
HIATL1	4	737;3313;14205;27756	2	1.99733	1.14308	0.0621797	0.685395	0.685395	GCCCATGGGGGAGAAGCCAG;AGTCCTGGGCAAGAAGCTGG;CCAAAAGCACCGAGACTTCG;GGACTTCACCAATCCCAGCC
MAGIX	4	101;22067;41439;57011	1	2.28429	1.14214	0.0374061	0.604172	0.600585	AGACGTGCAACAAAGTGCGA;CGCAGCGTACCCGCATCTCG;TGGCGGTCAAGAGCTTCTCG;AGGCTGTGTCCAACCTCTCG
HSD17B10	4	2022;2033;11793;13871	2	2.40662	1.14074	0.0308433	0.578474	0.578474	TCTACCCCATTGACCATGGT;GAACCGTCAGACAGTACTAG;GTCCATCAAGACTAGCAGCG;CACGGACGTATCATCCACCA
TRAF3IP1	4	1439;2398;8607;43407	2	2.26741	1.14023	0.0384529	0.602492	0.60135	GCTGTGAAAAGAAATCATAG;ATGTCCAGTGTGTTACACCC;GACTGGAAAGTCTATTGTGA;GTAAAGTTGGTGGTACATCA
NCOR1	4	5877;6608;7392;17026	3	2.50214	1.13996	0.025629	0.577158	0.566687	TGCCGACTGCAAACCACTCG;TTTATACTCAGAGTCCGATG;GCGCCTGAAAAAGCCACGCA;GCAGGTGGGAGTCCAAACCT
EEF1E1	4	103;13709;40362;65677	1	2.27581	1.1379	0.0379299	0.601802	0.60078	GTGGTGGGGAGAGGATACGC;AGGCTGCAAACTTTGCGTCG;GTTCGGAGATTGATACCGTA;TTCTATGGTAGGGACAAAGG
PUS3	4	104;19668;29564;72924	1	2.27163	1.13581	0.0381893	0.602873	0.60135	TGTCTCTCAACCATACAGCT;AAAAGCACGGAAACTTCTAG;ATGATGAACACGCATACAAG;ATAAAGCAAACAGTCACAGG
PIM2	4	105;10878;11523;36100	1	2.26749	1.13374	0.0384418	0.603824	0.60135	AAATAGGAAACTCTGGAGCT;GGCAACATCAAAGTCCCCGT;GCTGCATGGTCAAATGGACA;TTGAGGTTATCAGCACTCTG
NCF4	4	360;4982;28006;41385	1	1.73668	1.13314	0.104344	0.783266	0.783266	CACCATAGTTCCGGACCCCG;GGTACGCAGGCAGTGCCACG;CTTACCTAGGAGCGTCCTAG;GTAGAGAAAGACGACCCCTG
ILVBL	4	785;3342;41551;52933	2	1.99009	1.1318	0.063005	0.686067	0.685672	GTGGACGGCACTCTGGACAG;ACTGCGTGGTGGTTGGACGG;GATGGTGGCGTGGTCGACAG;GGGGCAGGGCTATGTATACG
PRSS50	4	107;15652;27412;62376	1	2.25933	1.12966	0.038974	0.604627	0.603316	TAGTTGACGCCAGAGTTCCG;TCATCACAGGACCTTATGGG;GACAGTTCTGCGACTCAGCG;TACCTGAGGAGGTTTCCCCT
IDS	4	1194;2730;20442;45172	2	2.15864	1.1296	0.0463196	0.635428	0.634662	TTCAAAGGCAGAATAATCCG;AAAAAAATGACATTACTGCA;TCACCGCTTCCCGCACACCA;TTGAATTGCTCAGTATGAAA
ATP5B	4	1605;2370;48715;51378	2	2.27729	1.12867	0.0377576	0.600585	0.600585	TTGAATTTGTTCAACACACT;TCCCCCAGTCCAGCGCGACG;AATGACACCACCAAGCCTGT;GTCATAATCATTATCTGATA
VIMP	4	4508;7520;7649;30654	3	2.4592	1.12659	0.0281575	0.570689	0.568268	CGACGTGGGGTGTAACTCCG;AGGAAAATTTCCGAACGGGG;CTGGATCTATGTCGCAGCAG;GAGCTGTCGAAGCAGCTCCG
THAP4	4	1691;2329;74965;76482	2	2.29197	1.1265	0.0369127	0.600835	0.600585	TTCTGGATGGTACATGACAG;CATCTGAATTTGATCTGGAG;ATAAAACTAGAACATCTGAA;TCGCCGAATAGATTCAACAA
UBA1	4	1937;2188;23999;24121	2	2.34459	1.12579	0.0338429	0.592299	0.590357	TGGCATCCAGGTCACGCCAG;TGAAGGGATACCAACCCGCG;AGTGCAGAATATGCCCCGCA;CCACCGCATAGAGCGCCTGG
DRG1	4	461;4510;17896;24750	2	1.74356	1.12485	0.102865	0.778679	0.778679	CTGACGCCCTTCACCGCGCG;TGTCGCAGAGGGGCTACGAG;GGCCTTCTTTGAGTTCGGTG;TGGACATCTCGGCGAAGTCG
AMPD2	4	110;10769;30509;45096	1	2.24737	1.12369	0.039753	0.604765	0.604765	CAGGCGACGAGTTTGAACTG;CAGTGGCTCCATTCACCGCG;GACCCCAGTTTACCCCATCC;CTCCGATTCAGTCCCTTCTG
NUTF2	4	1967;2193;30618;59523	2	2.34267	1.1231	0.0340312	0.592293	0.590357	TGACGCTCGTGACCTTCGCA;CCCTCCTGCTCCTTTAGCCG;TGTTGCTGGCCGACTACCTG;GTGAATCTGCCGTAACCTGG
WDR43	4	1765;2312;24627;67429	2	2.29814	1.12278	0.0364684	0.599819	0.599819	AGTTTGTACGAGTTCAGTGG;CAGAGAAGGAAGCCATACTG;CAGGCTCTAAACCATAGCAG;CCGGCCCAGCGTAGAAAGGG
SLC31A2	4	189;7345;19125;36264	1	2.01363	1.12267	0.0603317	0.682998	0.681845	CTACTTCATCTACACAGCAT;ACTGGTCACCCAACATCCGA;TCAGACAGGAGCTATACTCC;ATAGCCACATCAAAAGAACA
LSM7	4	1339;2651;16117;45032	2	2.18323	1.12203	0.044285	0.629508	0.628798	AGACAAAGAAGGCTACAAGG;AGCCCAACAACGCTTCACCC;GTGTGCTGAGAGTGTCAACA;ACTTTGTAGGTTATAAGCTG
NPIPB9	4	6585;7192;7239;57563	3	2.52844	1.12083	0.0241034	0.578022	0.566687	TCTCTGATCAAAGGAGTCGG;CGGGAGTCATATGGTCAAGG;AGGTTTCGGATCATTCCGAA;ATGCTGAAATTACGCCCAGG
CASK	4	112;40801;50198;58792	1	2.23958	1.11979	0.0402871	0.607011	0.607011	GGGAGGTGGACCCACCCATG;CATGACTCCCCGGGTCCGTG;AGTACTACGAAGAGAAACGG;GAAGACATATACGAACTGCG
GABRB1	4	800;3464;20081;75562	2	1.96038	1.11924	0.0666574	0.696853	0.696853	TAAAGAGACTGGATATGTAG;AGACGACCTTATGGGTACAG;GCTTGATAGGGGTAATACCA;ATTCATCGATAGACTCAGAT
PGPEP1L	4	225;6805;32951;55530	1	1.93852	1.11751	0.0696272	0.711329	0.710328	TCCCGCATCTGACAGCGCCG;TTCCCATTGACTGAACACCG;GGAGGCGGGATATATACCAG;CTGGAACAAGCCCTGAATGG
C4orf36	4	766;3570;49089;49515	2	1.93545	1.11703	0.0699743	0.711405	0.711405	GGTACGAAGTCTCGACACTG;CAGAATTCAGTGGTCGCCGG;AATTCATCGATAACCCCAAG;AGATGATAGACTTGCAGACG
DDX42	4	326;5609;9552;40626	1	1.77919	1.11551	0.0956827	0.770736	0.769588	GAAGGTGGAGCCCATAAAGG;GGGGAAGCGCTTGTAGACTG;CAGGTTGGCAAACCACACCC;AACACCTTGCGTACTCAGTG
ZNF432	4	115;26548;33699;50950	1	2.22815	1.11407	0.0410788	0.614519	0.614519	AATGCCCAACAAGAAAACGA;GAAGAATCCCGCCATTTGGG;CCTGGAGGAAATATCAGGCG;CTAGCGGCAAACAATCTCAA
NCAPH2	4	647;3952;7776;13949	2	1.85165	1.11286	0.0825865	0.740215	0.740215	CACATCCTCTCCAAAACCCG;GCCTGGAGGAAATGTTAAAG;TGATATGGAACGGTTCATGG;ATTCACCACCTCCTAAAGCG
CAPZA2	4	116;33186;43760;62233	1	2.22441	1.1122	0.0413367	0.616908	0.616908	AAGATGCCCACCATAAAGCA;GGCTGTGGCCAAATGGACGG;TGACACGTTCTAGCTCCATG;ATTCCTTTAGCTCCTAACAC
QTRTD1	4	117;10214;48606;72893	1	2.2207	1.11035	0.0416136	0.619569	0.618577	TCTCGATGATACGATGATAC;TCTGCAAGATGATATCAGTG;CAGCATCCATTGTGACGAGT;CCCTCCCCAAGAATGTTCCA
CMTR1	4	670;3933;9634;13895	2	1.85562	1.10926	0.0818687	0.739053	0.739053	CATTGATACAGGTAGCGCCT;GCTACCTGTATCAATGGCTG;CTGGCCAGCGATGCAAAGTG;CGGCCAGGGCCAATAGGGCG
OR7E24	4	1861;2369;21494;27498	2	2.27765	1.10883	0.0377452	0.601911	0.600585	GGCCGCGCGCGGGGACACCG;GCGCATCCTAGACTACAACG;CAAGATCGCCACGCTGCGCA;AGCACCCCCGAATCGCCCCC
IFT27	4	118;14384;35859;74543	1	2.21702	1.10851	0.0418635	0.620349	0.61872	TACGGCGAAAGCGCGAGCCG;GGGCCGGAGTAGCCGACCCG;CTGAACCTACTAGCAGCCCG;AGCCGCTTCCAAGCGCTTGG
SSU72	4	1707;2474;25199;64404	2	2.24119	1.1083	0.0401083	0.60577	0.60577	TCCTGGTCTTGCTCACAGAG;TCTTGTTCCCTAGGCACGAG;TCACCTACCCAGGTCTGCGT;GCCTCAACATGGCTGTGAAG
POLR3C	4	1491;2659;12479;21369	2	2.1807	1.10649	0.0445219	0.630025	0.628798	CATGGGTTCAACATGCCAAG;AGGATTAACTAGAACACTAG;TTTCGTTATTCATTGCACAG;ACCCGGAAGTAATGAGTGTG
HIST2H2AA4	4	1588;2609;18596;19560	2	2.19661	1.10322	0.0432561	0.623344	0.623344	GAACATAAAAAGCATTCGTC;CAAGTCTGGCTCGTTCTCAG;GCTGCGCCTGCACCCCGGAG;ATGCGGTGGTCCTTGAGAAA
NOB1	4	349;5683;10876;75094	1	1.74997	1.10227	0.101547	0.779021	0.778063	ACGGCGGTAGACACCGCTCA;AGAGCGCTCGGAATCCGTCT;CGGAACCGACGGCCGCGCCG;CGGCTCCGAGTCGGTCTCCG
VARS	4	6808;7432;7490;9427	3	2.48558	1.10114	0.0265307	0.576791	0.566687	TCTCACGAACGATGGAAACG;AGCAGGCTGTGGATCTCAGA;GTAGCCATTGGGGTATTCAG;CTGTGCCTACGACTATCTGG
ABR	4	1015;3293;13702;23033	2	2.00235	1.09999	0.0616389	0.687881	0.685222	TGAGGTGATAAACTCCTCCG;TACAGGTCTAGCATGTAGGG;GGGCCGCAGGAAGTTCGCGG;AGTCCACCGCATCACAGCGG
MRPL11	4	373;5534;11487;27061	1	1.72149	1.09987	0.107651	0.786478	0.783895	TGGTCCACCACAATGTGACA;CCTCATAAATGTTTATACGG;ATTAGCCGATCGTTACCTCA;GGGAGAAGCAGCCAAACTAT
Non-Targeting Control-AGAATGCCATCTAGTTAGTA	1	489	1	2.19966	1.09983	0.0430123	0.622687	0.622687	ACCACTGGGTGGTCAATCCG;TACAGGTCCAGCATGAACAT;TGACCATGTCGGCGTCGGTG;CAAACCGGAACTCTCGATGG
SRD5A1	4	123;52472;62159;63486	1	2.19908	1.09954	0.0431664	0.623482	0.623344	CAACTGGACAGGTTTCATAG;ATGGCGTGGCGAAAAAGTGG;TAACCTACCTATGACAACAG;ATAGCACTTTAAAAAAGGCA
ERICH4	4	281;6482;18695;49510	1	1.84294	1.09841	0.0840804	0.74721	0.74501	TCACCGATACCTGAAAAACG;AAAGTCATACCTGAGTATTG;AATGTCTGAAGATGACGGGT;AATGCCCAGAATCGAAAGTG
WNK1	4	6454;7346;7725;30265	3	2.4468	1.09788	0.0289634	0.572254	0.571245	AAGCGGAGGTCGGAGCGCCG;TTCTGCGACATGGCGCCAGA;TTCAGCAATAATGGGAACGG;TCTTGTGGTGTCTGCGAGCG
ZNF316	4	124;32908;42142;50390	1	2.19558	1.09779	0.0434269	0.624374	0.624374	TTGCGGCTGAGTCTGACTAA;GATGAACTACCCCGGGCAGA;GAGAAGATGGACATCACTGG;AAGAAAGTCCTGTCTCATGG
LDOC1	4	1599;2660;50651;67276	2	2.18039	1.09688	0.0445353	0.628798	0.628798	GTGGCTCCTGTAAGGCAGCA;GTATTCGGCGCTGAGTTCCA;CAAGCAGCCGGGCTTTCCAG;GACGTACGCCTTAGTAAGGG
RPL14	4	1503;2747;8143;35791	2	2.15344	1.09631	0.0466565	0.637266	0.637266	TCTCCTCCGCGGGATCCGCG;TCTGAGTGGCAAACATCCGA;GCGGAGGAGAGGCGCTGCCG;TGTTTGCCACTCAGACTGAG
KCNAB1	4	661;4206;12932;39750	2	1.80056	1.09281	0.0916119	0.764406	0.762842	TGGGATTAAAAAGACCACTG;CGGGAACAGTCCTCACACAG;GTGGGTTGTACGACTCGGCG;GGCTGTCGACTTCTTCAGCG
GOLGA8A	4	127;18023;32692;52161	1	2.18525	1.09262	0.0442057	0.629806	0.628798	GATGACCCTTAGAGATGACA;TCACTGTAAAACTCCCCCTG;CTGGAAATAAGGTTGCAGCT;AGAGGCCCAGGTATACCATG
DICER1	4	276;6710;9019;15834	1	1.85065	1.09191	0.0827799	0.740892	0.740892	ACTTGGAGCTTTATGCCGAG;TGGTCGGTGCAAGTCTGTTG;AGGGCTGGATTCACATTCAA;CTTGCAGGAAGCTTGACAAA
KIAA0226L	4	740;3995;24720;77135	2	1.84276	1.09098	0.0840979	0.746309	0.74501	GGCTGGTGGCACAGTCACTG;CCACGTCCTGACTCACGATG;CGTCATGTGGAACTCCACGA;ATTGAAGGAAGCCTCGATCA
NAMPT	4	454;5175;9813;58998	1	1.63752	1.08985	0.12827	0.792449	0.792449	CAATAGTACCTGTGAAAATC;GCCCTCTGTAAGCAGCACCT;TGACGCTTGTCCCCAGAGCC;ATATGTCAGCAAGCCCACTA
SLC19A1	4	129;17340;26040;59260	1	2.17849	1.08925	0.0447441	0.63033	0.629651	GGGGGTAGCAGACAAACCTG;ATACCCAATAGAGTCCGAGG;TCATAATTAACACACATCAG;ACAAATGATTAAGTTGACAC
INS	4	7121;7507;7672;18498	3	2.45544	1.08823	0.0284532	0.569335	0.568268	GCGGCCACATAGGATGTGGA;TGTGGTTACATAACGTTGTG;AGATAACTATGTTCATCGAC;TCACATCTGTCATTTCTCGA
HPS1	4	241;7381;30602;44630	1	1.90895	1.08651	0.073756	0.720698	0.720189	AGTCGAACTGTCACTGTCCG;CCAGACCCCTGTCATGACAG;AGTCGATTTCAATCTCGTCG;CACCAAACTCCTGAGCATCA
GJB1	4	131;18513;74902;75338	1	2.17185	1.08592	0.0452643	0.630589	0.630589	AACTGATGAGACAATTGCAG;GAAGTCACCGAACTCTCCAC;CCTGTGGATCCCATTGTAGG;AGGCAAGTCTAATCTCACAG
XKR6	4	2078;2446;66651;70642	2	2.25076	1.08515	0.039518	0.60559	0.603316	TGTACACCTAGGCTCCACCG;AGTCCTGTCAAAAAAACTGG;GAGGCAGGCAGCAATCACGT;AAGCGTGGAATATACAGGCA
PLEKHF1	4	833;3849;19769;22774	2	1.87338	1.08458	0.0790762	0.737145	0.737145	GACAGGAGGATCCGGTGCAG;GGTGCAGCGGGAGATTCACC;TGATTATCTCAATGTACTCC;GCAGACTTTCTCAACTCGTT
WDR78	4	132;18848;26302;47170	1	2.16856	1.08428	0.0455192	0.632737	0.632737	AAGGGGCTCCGTGTATTCAG;CCACCTGAATGCGAATCTTG;GGGAACGACTGAGTCAGCTG;TCTCACTGACACACTCGCTG
TERF2	4	2255;2361;20882;41063	2	2.28049	1.08425	0.0375294	0.601523	0.600585	TCTCGGGCTTTAGGTCTCTG;TCACCAACATCATTCCGGGG;CCATGCTCTCTAGGACGTCG;CTCTGGACACGCATAATGGG
CDC42EP3	4	1850;2599;51122;73981	2	2.19983	1.08369	0.0430123	0.624125	0.622687	CATACCTATCTCGTTCCGGG;GTGCTAGAACACGTGTCAGG;CAGTCGGGCGGGATAAAGTG;GCCTGTTGGAGACCAGCTGT
SH2D6	4	133;17043;17075;56601	1	2.1653	1.08265	0.0457846	0.635021	0.63433	AGAATACAATGATTGCTGCG;ACAAACCTAAATATGCCTAG;AGATATTATAGATACCCCAA;GGTATGTACACAAATCAACA
DHFR	4	2146;2437;11826;16140	2	2.25385	1.08192	0.0392875	0.603529	0.603316	AATGTCTCGCTGACTAAGGG;GGGCTGAGGTGGCTGACTGT;GATCTCAATGATCGCTCCAG;ATTTCCTGCTACACCAGAGG
ZFP1	4	134;40850;64069;69500	1	2.16206	1.08103	0.0460469	0.635852	0.634662	AGGTGTCTGAGATCACCCCT;CAGGCGTCAAACAATTCCGG;CCTGACGGAGTTTACCCAGG;GCCAGACGGTGTGCCCATCA
CHMP2A	4	1413;3005;18376;35354	2	2.07848	1.07975	0.0534204	0.669941	0.668077	CTGAACCATTCAGCATGACG;ATAAAAAGGTCATAGTCTGA;TGTCGACAGAAAAATGACTC;CGCTCAGGGGCATAAAACGA
CXCR6	4	135;51302;56469;66634	1	2.15885	1.07943	0.0463098	0.636684	0.634662	CGGTCAATGTATTCAACTCG;TTTGACGCCATGTTCAACGG;TGGATGCAATAAGTGCAGAA;GTTCCCACTGATGACAATTG
FGD2	4	366;6047;22164;29464	1	1.7296	1.07898	0.105844	0.787001	0.783895	CCACAGGACTGGGCACCCCG;GGATGTGGACTTGGTTTGTG;ACAGGCCAACAAGCACCGAT;CCACGAAGCAAACATCACTG
PLEKHG1	4	257;7341;71400;75075	1	1.88131	1.0787	0.0779129	0.732825	0.732825	AACTCCTCGATGGTCATGAG;GGCCTCGGACCAGCGGACAA;CTTCTTGGCGGTGTATAGCG;CACTGCAGACGCCATCACCG
PET117	4	2040;2538;15493;18945	2	2.21975	1.07727	0.0416454	0.618577	0.618577	TCTCTGTCACTGATATCCTC;TGCAGCAAAATAACTAGATC;TATTCCTTATAGGCTTCTAA;CCGCTGGAGTTTGCAGTAAG
CACNG3	4	138;22449;53070;67248	1	2.14936	1.07468	0.047077	0.641616	0.641616	ACCACACAATCAAAGCGGAA;TCTAGTGATCCTTCACTGTG;AGGACACTCCACTTACACAC;AGTAATGCTTGTATTGCTTG
WNT10A	4	2363;2394;28196;28780	2	2.26882	1.07421	0.038273	0.60268	0.60135	TTTACGGTAGCGGTCAACAA;CTGAGTTGTATGGCCATCAG;GTACCAAAAGGACTCCAGAG;ATGTTGTGTACCCAACTGCC
CPA2	4	1302;3193;11859;13756	2	2.02797	1.07412	0.058625	0.679596	0.679299	TGCATGACCAGTAATTGCAA;TCAGGCTCAGGTCCGGATAG;TACAGCTCGCAGAAAGAAGA;TAATATAGCTGGTATTGAAG
ACSL5	4	139;20761;51596;71184	1	2.14624	1.07312	0.0473339	0.64372	0.64372	GATCATGAGAGGCAGCTCTG;CCTTCTTCAGGAGCGCCCAG;AATTGTTCCCTACCTGAGTG;ATACAGTGGAGCAACAACAA
DBR1	4	1492;3000;25801;48585	2	2.07987	1.07278	0.0533542	0.671793	0.668077	CCAGCCCATCCTCGTCAGAG;GTGTATTGGGAAGACATCCG;ATGCACAGCAGGGTAACGGT;CATCCACATGGAGGGACCTG
PRAMEF9	4	140;15410;40466;44273	1	2.14314	1.07157	0.0476008	0.645952	0.644734	GAACGCGCTCTTCCACGCAG;CCGGAGTCAGACCTTCAATG;GCAGACACAATACCTGAGCT;AGAGTTTGAAGCCATCGTCT
VAMP1	4	724;4339;19228;47271	2	1.77509	1.0715	0.0964793	0.770241	0.769588	TCAGAGAGGAATTCAAAACC;CAAGGAGAAGCTTATTCGTG;TGATGAATCTTGGGTCATTG;GGTAGCAAAACAGTGTACCC
CYP24A1	4	2230;2488;15095;74662	2	2.23645	1.07104	0.0404006	0.607265	0.607265	AGTGAAGCTGTATTGCCACG;AAAATGGAGAAAGGTACACT;AGGAATTGAACCCTTGAGCG;GCAGATGCGATATTTCAGGA
RAD51B	4	1057;3592;12872;44038	2	1.93037	1.07037	0.0707014	0.711887	0.711445	CGGCTCAAGTACCAGCACAC;GGGATCAGACAGTTAAACTG;GTATTCAACACATCTGATAG;AGTCCCACACCAACACTCTG
RNASE2	4	141;43437;63556;70004	1	2.14007	1.07003	0.0478493	0.646531	0.644734	TCATGACGAGCCCCTCTGAG;CGGTGTCTAGGTCTATTCCG;CCTCCTAGGAGATGAATCCG;GACATTAGGAGCCAAATCAG
C10orf55	4	743;4321;21045;74692	2	1.77849	1.06899	0.0957605	0.770375	0.769588	GCTGAAACAGAACCGCATGA;GGAGTTGATTGAGCCAACAC;AGAGGAAAGTGGAATCTCTG;AGCCGGAAAGCACCCCCAGA
PRMT9	4	142;8530;38161;48800	1	2.13701	1.06851	0.0481031	0.647177	0.644734	GTATTATCTAAGTACCGCAG;TCAGGATGGATCAGATGACG;GGTTGAGACAGTCATGTCAG;GCAACGTCATCTCGTACTCG
OSGIN1	4	143;10931;16004;17932	1	2.13398	1.06699	0.048361	0.645121	0.645121	GCTCCCCTAGAATCACGGGT;TTGAGGACCACCAGACGGCG;ACAGCCAGCACATCTACCCT;GCGCACCATGTCGCCCCACG
WDR61	4	728;4422;14228;16387	2	1.75962	1.06557	0.0995548	0.777022	0.775667	TCAGGGATACACTTGTCCAG;CACACTCTTCGATATCCTGG;AACCATCCGAAACTATGCTC;TCAGGAATGCCCGATCAAGG
LCORL	4	144;32361;62472;75771	1	2.13097	1.06549	0.0486197	0.647198	0.646911	GCATGCACTCGTGAGCCCTG;CGGGAGCTGAGAGAAAGGCG;GAGCGTCATGAACAGCAGAC;GTTCATGACGCTCTGCAAGC
TMEM163	4	146;12177;67171;69839	1	2.12502	1.06251	0.0491693	0.65038	0.649361	AGAAATTGTGATAGGAACTG;TAAGTAATCAATGATAGCAT;TTTCCGTATCCAATATTGTG;ATTCGCAAAAGAGTGAGGAC
NSMCE4A	4	1317;3312;7836;44448	2	1.99758	1.06242	0.0621674	0.686463	0.685395	TGGATCTGTTGATCTACCCT;ATCCCGTCCAGTGTCCACTG;TGCCTATGGGCAATAATGCA;TCGGAGTCGCTGCAAAGTCG
MAP3K1	4	147;29030;72332;73772	1	2.12207	1.06103	0.0494336	0.651135	0.651135	ACGTTCACCTGCTCTCGTTG;AGGGGTACACAAATAGCACA;AATTCTACAGATCAGACCCA;AGCCCCAACGTGTTGCCAAG
IDUA	4	148;59312;73689;74557	1	2.11914	1.05957	0.0496932	0.653185	0.653167	TACCCGCAGACAGTGCAAAA;TCCTCTCAGGGCTGGAACAG;ACTCCTCAGATGCTCACGAA;AAGCGCCCTACAGTTTGCAT
ZBTB8A	4	2252;2592;34454;71889	2	2.20209	1.05829	0.0429348	0.624444	0.622687	GGGGGATGGAGTGAGCTACG;CCTACCCTTACTCTACCCCG;AAATCCGCCAGTATTTGCGG;GTCCCTTCAAGATACGATTG
TFCP2L1	4	149;18289;48020;71696	1	2.11623	1.05812	0.0499557	0.655264	0.653167	GGGCCAGTTTACCCTCACCC;TGCCCTGGAAGAGATTCGGG;CTGGTAGATGAAGCTTGCTT;GTATCCACCCCTACAACAGT
SPATA31D3	4	1297;3406;25463;43702	2	1.97437	1.05678	0.0649997	0.689854	0.689854	GAAGGTCTCTATGTGAACCG;GTGGATCTCTTGGATCACTG;GAAGGATTCCCGGTGCAGAG;GACAACAATGCCAGCGCTAG
LOC102724862	4	2143;2681;14043;19633	2	2.1738	1.05542	0.0450566	0.631899	0.629651	TCTATCCTTGATCCTAGAGC;TTGGTAGAATTCTCTCCACC;CACACACTGCCTTTCGCCAA;ATATGGTTAGGTGTCAGCAG
GTF2E2	4	151;8881;31999;39995	1	2.11048	1.05524	0.0504646	0.655102	0.654573	GGGTCGTGGCGTAGGCCGGA;GAAGCGGTGGTATTCCCGTG;AGCTGGCCGCCGCCCAAACA;AGCCCCGCTCTGGATCCCGC
HEATR5B	4	566;5259;33088;68886	2	1.61907	1.05424	0.133338	0.797111	0.796239	ACAGGCGAGGTTCTGTCTCT;TTCCTCACAAACCCACACTG;CTTGTTAATGCAGATGGCCA;TAGATTACCTGGGAAGGCAA
CYP2A6	4	152;13660;37428;45404	1	2.10763	1.05381	0.0507239	0.655758	0.655758	ACAAGGGCACCATGGGCGGA;GCGTCGAACCCCCTGACAGG;CCACTTTGAGATGACAAGTG;CAGGTGGCATCATTGAGCCA
LRRC72	4	741;4599;64767;76684	2	1.72764	1.05242	0.106218	0.786067	0.783895	AGACGCGTCAGCTAGTGCTA;TGAACCCGACGAAGCCCCGG;AGAGAAGCTGGCGAACGGCG;TCCCCGCGGGAGGAAGCGTA
RASSF10	4	153;10617;34234;42600	1	2.1048	1.0524	0.0509878	0.657816	0.657816	GGGTGATAACGGCCACACCT;TATCTGGAACGTGTTTCCAG;CACTAGACGGCACTGTTAGT;CCATTAAGTCACATAGAAGC
HMG20A	4	608;5103;46496;68855	2	1.64335	1.05221	0.126598	0.793037	0.790583	GTAATGACCGAAGTAGCCGG;CCGGAGGGCACTGAAACCAG;GCAGCCTGCTATGACCTACT;GCAGGTCACCCATATGTAGG
TNFRSF13B	4	1258;3521;36052;53901	2	1.94688	1.05182	0.0684373	0.704904	0.704904	CACAGATGCTCACAATAAGG;CAGATGGAAGATGCTTACCG;TTCTTCTGAGAACTCACTCG;GATCAGCAAGATATTACCAA
WWC1	4	154;32959;74548;76155	1	2.10198	1.05099	0.0512449	0.659779	0.659779	GCCACTTGCCCGAGAGCACG;CCCAACTCCGGGGACGTGCA;GGGCATCAAACACTAGCCAG;ATCCCAAGTTACCCGCTATG
CDADC1	4	1972;2844;34377;49086	2	2.12443	1.05001	0.0491956	0.649361	0.649361	TCCAGATGTGAGTTATCAGG;TCTTTGAAGAAAGTAGTCAT;CTATTCTCAGGATATGACAG;TCCCAGCATCACCTCGAACA
MRPL19	4	155;23210;28122;42945	1	2.09919	1.04959	0.0515153	0.661904	0.661904	AGAAGCGCAGAGGCTCGTAG;TTCCCGTCCCTGTACGACCG;TCTTCTACTCACCGCCGCCG;ACAGCCCCACCATGAGCCAG
SMARCA4	4	406;6393;42187;53376	1	1.68523	1.04948	0.116051	0.788267	0.783895	TTCTATCTAGTCGAGCCCAA;GCCGTGTGTGTTTGTGACGG;AACTGAAACTGTAAGTCACA;TGTTCTAAGAGATCTGAAAG
EBAG9	4	2178;2726;16550;16562	2	2.15987	1.04863	0.046145	0.63581	0.634662	GGATGAAGATTGTAGAAGCA;TCTAAATTATGCTTTCTTAG;TATTAAACATAGATGAGCAA;GAATTACTAAAAGTCAACTC
OR51V1	4	1424;3350;28562;33335	2	1.98811	1.04856	0.0632534	0.686392	0.685672	CTGTACCTGGTCCAATACTG;TCAATATTGAAACGACCAGG;CTGCTGACGGCGGGAAGCGA;TCATAGTAAAGTTATACAAA
WDR20	4	156;48778;57822;75548	1	2.09641	1.04821	0.0517786	0.663928	0.663429	TGTGAAAGGACACGGTCCAG;CCCAGGAATAGCTGTCACTC;TACCTTTACAACGATGCCTG;ACGTCAGCTTCTCCCAAAGC
DNAH3	4	157;26214;56956;61703	1	2.09366	1.04683	0.0520313	0.664457	0.664457	TGTCGTAAGAGAAGATACCC;GTGATAGACCTTCTCGGCCG;GCAATGAAGTATAGATGGTG;CACACCAAACTGCAGACGTG
UBE2M	4	1445;3353;26164;37614	2	1.98737	1.04632	0.0632961	0.685672	0.685672	ATATTTCTGGTGGCATTCGG;AGACGCTGGACAGCATACGA;GGGTAGAGAACCCGGCATTG;TAAGCGTATAATTTGTCAGA
C12orf77	4	2546;2555;35212;66280	2	2.21415	1.04625	0.0419692	0.618997	0.61872	TGTGAATGTCAATGGCACAG;TACACTGGCAAGCCAAACCT;GGAAATGCCCCAGGGCAAGG;GCTCTGCAGCGTGTTCCCCA
MSTO1	4	1501;3294;14164;24629	2	2.0021	1.04604	0.0616555	0.686847	0.685222	TGGCACTCAAAGATAGAAGG;GGGGAAGGGTTAGTATTGTG;GAGGTGATGTAAGACATCAG;CCAGCGTGAACGTTTCCTAG
C7orf60	4	158;32490;45534;50584	1	2.09091	1.04546	0.0522965	0.66514	0.66514	CCAGATGAAGGACATGGTAA;GAGCTGCTGGGAGAGTACGT;GGTGACGGCGACCCTTTCCA;TATTCGACCCTCTGGTACAG
AVL9	4	1723;3092;37915;73749	2	2.0547	1.04488	0.0558001	0.671632	0.670877	TGGTTAAGATCATGTTCTCC;GAAGATGGCGCTCACCAGGT;GGAAGAGAAATGAAGAAGAC;TTGGGGTCCTCGATACGGAA
NSA2	4	2237;2734;15812;23759	2	2.15741	1.04428	0.0463648	0.634662	0.634662	TGGTGTAGTAGGGCTTCATG;CCAAATCTCCTGGTAAACTT;CTTCATCGTTTATAAAATCC;CCATTCCTATCCAAATCTCC
TMSB15B	4	159;11386;12082;45819	1	2.08819	1.0441	0.0525542	0.667066	0.667066	GGCACTGGCACAACTACCTG;GGGCAGCGACCGACTCAACG;ACAGTCATCTCGTCACCCAG;TAGATCCACCTGTACACACG
C6orf99	4	823;4493;16917;48810	2	1.74663	1.04402	0.102154	0.779871	0.778063	TCAAGTCCTTAGATATGGGC;TTTCATCTGGAGTCATACAC;CCTCTTAGACGATTTCAGGA;GACGAATTAGAGGTACCCTG
ZNF397	4	2145;2796;50441;54041	2	2.13866	1.04358	0.0479156	0.646038	0.644734	TCAGGGAGTAAACCCCTAAG;GCCATACCGGTAGAGTACAA;GGTACACAGGTCCTTACCCT;TGGGCTCTCAACTTGTCTGG
CCDC73	4	825;4495;22262;24608	2	1.74627	1.04356	0.102317	0.779218	0.778063	GAAGGCTGGTGCGACGACCA;CCTGTGGCAGTTGATCCTAA;CGGGCAACACCCAATACTCG;ATAGCCATCCATGCAAAACC
GEMIN6	4	1270;3621;20970;33337	2	1.92373	1.04279	0.071559	0.714794	0.713812	TGGTAGGCGGCACAGACACT;GAGGTTTCTACAGGAACACG;TGCTTGATGCAGTCCACTAG;ACATGCCAAACATCATACTT
KDELR3	4	384;6774;9852;19289	1	1.70906	1.04222	0.110465	0.795022	0.783895	CTAAGCAGAAAGTACCCCCG;GCAAGCCAGCAGACCCTCGG;CCCAGGGTGAGGCTTACACC;CCGAAGCCCCCCCACGCAGG
SMO	4	161;20529;31373;46311	1	2.0828	1.0414	0.0530756	0.670974	0.668077	CTGGTTTCATGGTTCCTCCG;GCAAGTGAACATCTAACCCA;CAGCCATCCAAACAGACGCC;AGGCCAGGAAGCAAGGCTAA
HDGFL1	4	1851;3037;18133;57879	2	2.06965	1.04022	0.0542486	0.668322	0.668167	TACACTTCTGAATCCTGCAA;TTGTTCAGGATTTGGCAGAC;GAAGTGTATTTAGCATCTCT;GGAGTCTGAGAATGCATTGT
ZNF644	4	162;45158;47079;48350	1	2.08012	1.04006	0.0533437	0.673009	0.668077	CCGGCCAGTTGAAGTGCGAG;CAGGCGGAGCGCGACCTCGT;AACTACCACGTCCTGCGCAC;ACGCAGAAGGAGGTCCAGTG
PCNA	4	1537;3340;8751;17861	2	1.99059	1.03898	0.0629738	0.686918	0.685672	GCAGAAGAGAGACTTCCTGG;GCTGGATGTCATCCATCCTG;ACCGCCCCATAGCGCCTCAG;CTTGGAAAACGGAGAGACTG
OR13A1	4	163;38604;47485;68293	1	2.07747	1.03873	0.0535914	0.670747	0.668077	AAGTTAACAAGAGCCAGCAA;CAGCTTTGCCGGAATTAGAG;TCTTCCCCCATCCATCACCA;ACAAAGCGGCAGTTGCATAG
TICRR	4	1867;3042;14449;18865	2	2.06828	1.03861	0.0544487	0.668167	0.668167	TTTGTAGAGATTGGTGACGG;GCCGTGGCCCAGCTCTACAA;GCAATAAGGATGTGTTGGCT;CCCTAACCGAGCTACTTCAA
SERINC4	4	746;4839;21518;38769	2	1.68632	1.0377	0.115673	0.789115	0.783895	TCTCCCTCGAGAAAAATGGG;CCTGAGCAGCGGGTACGCAG;TGCATGGCGTGGCCACGCAG;CGCTGCTCTGGGTGTCACTG
CHRM2	4	164;8731;56781;73190	1	2.07483	1.03741	0.0538564	0.670058	0.668077	TCCGGATAATCGAAGAAGTC;GGGTTTCTCTCCAATAAACT;CCTGAGTTAATGAACACGAT;TCAGGTCTGTCTAAGAAGCG
CYP2W1	4	165;7992;30438;60402	1	2.07221	1.0361	0.0541105	0.669244	0.668167	GGAATCCTCCTCGCAGCGCA;GGAGGATTCCACGTGCCGGG;GGTGGGACGAGGTCTCCACG;AGGACGCCTCGAGGATGCGA
FITM1	4	2579;2642;15606;45530	2	2.18608	1.03522	0.0440504	0.629019	0.628798	TTTAAAATTGAGCAAACTAC;TATTCTTGTGAGATACGTAG;ATGTGATTTGTGTGCGCCAC;AAAATCGCAAATGCCCATCG
CDCA3	4	2161;2874;19815;38602	2	2.11567	1.03493	0.0499785	0.654198	0.653167	AGACGGAAATAGAGATGCTG;GGTCGGAGAGATCTTCTCGG;TGGCCGACTCTTCTCCTGCG;CGCCGCCTTCACGAAGCTCG
ATP2B1	4	166;14677;25542;69206	1	2.0696	1.0348	0.0543794	0.668621	0.668167	AGGACACTGAGCGCCGCTCG;TCCGTCGCGCTGTCCTCCAG;CTGCTGCGGCGCGCGGACAG;CCCTCCTCCGCTACCCGCGG
AFTPH	4	577;5623;18621;58692	2	1.56533	1.0336	0.149382	0.805639	0.7989	TCCACTCAGATCAACTACCC;AGACGAATTTGATAAAGTCC;GACAGCCGTCCATCATGCAT;GAGACTGGAATGGCTGACAA
FGF18	4	167;10969;43973;46577	1	2.06701	1.0335	0.0546414	0.669224	0.668316	GGGTGGCATCAGCTCCAAAG;GGCACTGACAAGCCTCAACG;GGAGCCCGTCATCTTCATAG;GAGACAGATCCACCACACAG
CENPI	4	2165;2889;36554;54966	2	2.11132	1.03324	0.0503047	0.654378	0.654378	GAGAAAGAGGAGTACTGCGT;GGTTCCCAATCCCGACTGTG;TATCCCAAGTACCCACGTCG;GCCAGTGAAAGTCCCCCAAG
NDUFC2	4	656;5279;18551;61779	2	1.61601	1.03237	0.134161	0.797475	0.797347	GTTTGCACGGGAGTGCACGT;GCTTGGATTCAAGTCCCTGA;GACTTGAAGGAGATTCGAGT;AAGGTACAGTGTATGTTGCA
C14orf119	4	168;9197;55988;60982	1	2.06443	1.03222	0.0549121	0.668629	0.668629	CCACGTGCTAAAAAGATGAA;CAGTAACTGTAACATCAGTA;CAAGAGAAAGGACTTACCCT;GGAATGAACAAACTTAAATG
SPC24	4	2008;3018;15760;43906	2	2.07488	1.03109	0.0537255	0.669757	0.668077	GGGGGCAGTCTAGACCCCCG;TTAAGTCCTTGCAAAGAGCG;TGAATCGGAGAAAACGGTAC;TTTCGTTGATCCGATTCGCA
CD200	4	169;61335;70185;77344	1	2.06187	1.03094	0.0551613	0.670365	0.668997	TCTCCCAGAAATTACCCCTG;ACAGCCTGATCGGGAAGGAT;TGCCAGGCTACAGATGCACT;TGGACTTGAGTGTGACGTTG
KMT2C	4	1846;3163;53961;62667	2	2.03581	1.02931	0.0578132	0.675168	0.674084	CTTACCGTGCGACGAAGTGT;GCTGAGTTTACTTGTAGGAG;CAAAGACTCCAAAAGTGTAT;AGTTATCCAGAACCAACAGC
Non-Targeting Control-CTCGGCCCACTTGCGTTATA	1	678	1	2.05774	1.02887	0.0554979	0.670564	0.670564	GAATCCAATGATACAAACAA;AGAACTGGAATGACGATACA;GAGGGTATATATATGGCTCC;CCATATACGACTAACGAAGG
ZNF567	4	481;6325;45153;66806	1	1.61288	1.02819	0.135095	0.798499	0.798499	TGGAGATTTCCAGAGACACT;TTGTGGAGCCCTGATAGACA;ATGGGAAATCCACATATATG;AATATTAAACCAAATCTGGG
MEF2BNB-MEF2B	4	877;4612;75603;76167	2	1.72535	1.02803	0.106727	0.786129	0.783895	GCACGCACACGCGTCCGCCG;GCGACAACGTGACCTGCGCG;CGGCTGGCTCCCGTTCGTCA;GAGGCCTCTTCGGCACCGCA
CEP112	4	1563;3449;26623;31637	2	1.96398	1.02783	0.0663007	0.695438	0.695438	GAGAGCACCAAGATCCAAGT;GGTTAAATGTCACCCCGCGC;CAGGGGCCATGCATGCGATG;GAATTTCACACTGTATCGAG
IFNL1	4	172;48945;71953;74093	1	2.05428	1.02714	0.0559434	0.67207	0.670877	GCGGGATGCGCAACTTGTCG;GGGACTACACGAGACAAGAT;GGACCGGGAAGAGCGCGTGT;CAGGACGGATATTTACACAG
Non-Targeting Control-AGCATTCTCACCAAGACCGA	1	685	1	2.05328	1.02664	0.0559982	0.671444	0.670877	GCTCTGCTCGCTGGTGTACG;CCGGGGAAGTCGGTCCAGCG;CAGCAGACCCACATACACAG;GCTGCTCCGGGACTACGCCG
WDR5	4	173;28432;70787;73726	1	2.05178	1.02589	0.0561884	0.671163	0.671163	GAGGAGGCCACCGAAGCTCG;GGTACTGGCGGTGGCCTCTG;CTGCACCAGCGTCCGGATCG;CTACCGGAGCACAGTGCACG
NUS1	4	1467;3586;14362;35656	2	1.93175	1.02572	0.0704766	0.71305	0.711445	CGTCTACCTGGTGTACGACC;CTGGCTGAACTGGTACATGG;GACAGGCCTGCAGATACCCC;ATGGGAAAGTAAATCTTTGG
F2RL2	4	1312;3800;11722;29942	2	1.88393	1.02506	0.0774573	0.730727	0.730727	ACCATTAGCCTCGTCCGCCG;AAAGGTTGGATTTCAAGGCG;AGGTGGAGTGAGCGCCCGGT;CTCCCACGCAGACAGTAGTG
SAMD4B	4	174;35152;35535;71342	1	2.04929	1.02465	0.0564577	0.671826	0.671826	GTGGAGTTCAGGAGCAAGGG;GCAGTTAGGAGGCCTCCCAG;GCGTATGGGCACGGTGACAG;GCTCGGTCCCAGATGACGGC
GSTZ1	4	2504;2787;30306;64320	2	2.14135	1.02415	0.0476708	0.645508	0.644734	CAAAATGATGGATTCCTGTG;TGCACACCATGTCACCATAG;AGGTCTCAGAAACGACAACC;AACTGTATCTTCAGATACAC
VHL	4	1954;3140;23383;42249	2	2.04188	1.02372	0.0572414	0.674761	0.674084	GGCTGCCCTTGACTTGGACG;GTCACAACCCTGGAGAACCG;CTCTTCAGAACAATATTAGG;ACGTACAGATCCAGAGCGGG
CCDC18	4	175;11341;36891;44659	1	2.04682	1.02341	0.0567146	0.673606	0.673606	GCTGCAACTCAAAGCCACGC;TGTGCAAGAGAAAATTCCAT;ATCACCAACCTCCGGCCCGT;GACAGTGTGGCACTGAAGGG
SF3A1	4	2367;2876;10426;13721	2	2.11508	1.02275	0.0500037	0.653167	0.653167	AGGCTCGTTTAGAAGTGCAC;GTTCTCTCATAAGAGGCCAG;CAAGGATCTCTGGTCCTGTG;ACATCTCTCTCCAAAACACT
ADGB	4	176;41025;51027;72446	1	2.04436	1.02218	0.0569731	0.6754	0.674084	TCCATTCTTCAGGCCCATGG;AAGAGATGAGCTAATAATAA;AGTTCGATATTCAGATTCAG;GTATTCGTAAGTTACAACCC
LRRC31	4	177;47005;73263;73368	1	2.04192	1.02096	0.0572277	0.675868	0.674084	TGAAGAACCACATAATTACG;CAAAATGTTCTAACTCCCCA;ATAGCTTCAGAAACAAACTC;CAGATGACCAACGTCCACAC
NBPF20	4	2217;2989;7849;67988	2	2.08293	1.02064	0.052944	0.67066	0.668077	GACCGTCTTCTTAAGTCCCA;GAAACCCGTATGCCACCCTA;CAGTGCCAATTCCTGTACCA;TGTCTGTGGCAAATGGCATT
TMEM87A	4	179;32042;52973;56160	1	2.03707	1.01854	0.0577457	0.676895	0.674084	TGAGTATAGGATCAAACCAG;AAAGGGAAAAACTACCAGAA;TGCCACTGTTCAAAATGAAG;AACAGTGGCAACATGCTTGG
TGM5	4	2002;3164;27947;37091	2	2.03555	1.01837	0.0578277	0.674084	0.674084	GCAGATTGGAAGTATCAAAG;TGTCAGAGTGCTAACGCAGT;GGTATCCAGAATGCTACCAG;TAAGAATGGACTTACACGCT
WDR4	4	1452;3730;12213;60434	2	1.89925	1.01629	0.0751399	0.727433	0.726115	TTCCCCACAGAACACGATGT;TTGTTATTGACTGCACCCAC;GACTGGAGAGCCAACCTCAA;CAAGCCCCCAGTCCCAATCG
C6orf163	4	181;38696;54992;76711	1	2.03228	1.01614	0.0582549	0.677807	0.677037	AGCTTGTCAGGACGTGCAGG;GGTGGATCCAGATGTATCTG;GGACAAGACAAGGGTCACCA;GAGGGTTGCTGTGACGCAGT
TRPC6	4	183;7923;63437;67125	1	2.02754	1.01377	0.0587671	0.679989	0.679299	TCTCACAGGGACATTCGTCT;CTGGACGAGGACGCCCCCCG;AGCACACATGCCTGTCCGGG;GTCCCGGCACGAAAGTGTTG
FBXW11	4	770;5236;9083;14548	2	1.6226	1.01201	0.132348	0.795734	0.794676	AACAATTATGAGCCCCGCAG;AGTCTCCCGATTCACCTTTG;GGGCCTAATCGATATCTCCC;CCTGGGAATCCAGGAAAAGT
WDR93	4	941;4719;10867;14564	2	1.7067	1.01198	0.110985	0.796026	0.783895	CCTAGGCAACAACTACGACG;AGGTGCCCAGCATCTCATAG;TGTGCGACCCCTACCCCGCG;CGGCCTCAAGAACCCCCACG
COPS2	4	888;4866;9346;9716	2	1.68181	1.01178	0.116865	0.787836	0.783895	GGTGAGCTCGGCCGGCACGT;TGCCGGTGGTGGGGTCGTAG;GATCTTGGGCACCGTGCTGT;ATGGTCTGCGACCCCTACGG
GP1BB	4	2711;2811;20328;35714	2	2.13418	1.01146	0.0482294	0.644734	0.644734	CATGCGGGTCGCACACCATG;GACGACGTGGTGACCAACGT;CCCGCGTAGAAAGCAATGCG;AGAAGTAGACGCCTGGCATG
FAM207A	4	185;43778;46843;69776	1	2.02286	1.01143	0.0592942	0.682318	0.679299	GAAGAAGCGCTTCTGGCACG;GATGTGTGAGATCCCTATGG;CCAACGGTGCTGTGACTCTG;CCTTGATGGGTGCTTTGACA
C9orf64	4	1315;4005;34320;67719	2	1.84071	1.01034	0.0844062	0.745885	0.74501	AGAAGGCGGCGTAGGCACGT;TCTATAGTGGGCCGTACTCG;AGGCTGAGGAAGTAGACGCC;ACCCGGGCATAGGGTCCAGG
SEC22A	4	186;26905;40196;54802	1	2.02053	1.01027	0.059548	0.680255	0.679299	CCTGGGAACCCCGGTCACAA;TTAATGGGCACATCTGAAGA;ATGGGAGAGAAAGGCCTCCG;CAGGATGTCCTGGCAGCCCG
KRIT1	4	187;25820;33547;51263	1	2.01822	1.00911	0.059811	0.679552	0.679552	AATCACTCAACTAAGAGGCC;TGTGAAAGGCCAGTCAGAGA;CATTTCATAGAATCTATCCA;ATAAGAGATTACGTCCTGCA
C14orf80	4	2772;2809;33259;40893	2	2.13478	1.0088	0.0482032	0.645758	0.644734	GAGTACTCGGCGCACAAAGA;GCTGAGCAAGGATGTCCGCG;CAGGGACGGGCACCACGCTG;TGTGGGATCCTTCTGCATCG
RGS16	4	1511;3761;39152;48319	2	1.89243	1.00858	0.0761594	0.726115	0.726115	TAAGCAATAGGTCCAAGGAG;GTCCTTGCCAGTGAGACCAG;CCCACAAGAGCCCATTAGAG;GTGGGACCCCTCCACAACGT
RABIF	4	2300;3072;7872;14546	2	2.06011	1.00819	0.0552617	0.668997	0.668997	CATTATGTGTTGCCCAGAGG;CTATGGAAAGTGTGTCATCG;ATGCACAATACACCAAGTTG;CCCAGAAAGTCTCGTAACTG
PDLIM5	4	188;23919;76180;77111	1	2.01592	1.00796	0.0600701	0.681264	0.681264	ATGCGGATGGGATCATACGG;AGCCGGTGTCTGTGTTACCA;TCAGTCCTTGCATATTAGGA;AAAAGGATGATATTGGACGA
GATA2	4	1213;4209;19343;48188	2	1.79997	1.00786	0.0916673	0.762842	0.762842	CTGAAAGCACCTCGGTCCAG;GCTGGGTCCACAGCTCCCGT;GGATTGGGGACAATCCTGCG;GGTGCTTTCAGGGCACAAGG
CTDNEP1	4	2425;3015;14781;25016	2	2.07571	1.00645	0.053684	0.670569	0.668077	GCGAGGCCTACCGCGCCGAG;CTACACCACTACTACGTCCA;TCTTCTGTCAGTCGATCACG;GCGCGCCGGTCGCCCAGACA
SETD1A	4	2416;3056;10393;30690	2	2.06446	1.00319	0.05478	0.668316	0.668316	AGCAGGTTGCCACAGCACTG;ACAGTTTCGCACCTCATGGA;GAGTGGGTGTGGACACCCGA;ATTCTCAACAATGCGCACAA
DYNLRB1	4	879;5054;18600;23580	2	1.65114	1.00298	0.124539	0.790382	0.790382	TGGTGCGAGACTTGGCTCCG;ATTCTTGGGTCGAAGAAGCA;CTGAGTTCTGCATCCCGCCA;CCCCGGGCCCACACCTACGG
TBCK	4	925;4934;9520;18011	2	1.67057	1.00233	0.119647	0.785522	0.783895	GGGACCCTGTGCGGCCCGCG;CCGAATTCTGCATCCCGCCG;AGCGCGGGTCCCAGTCCGTG;CCGGGGACTCGGATCCCGCG
OTOA	4	193;14654;22800;64456	1	2.0046	1.0023	0.0613751	0.689838	0.685222	TCTCCCCGCCACTGAAGTAG;GGCCAGGTTCTGTTCCGACG;TCTGCTCAAAGGTTTCGCCC;GTCAACACATTGCTGTACAG
CPVL	4	2505;3022;32924;55716	2	2.07378	1.00157	0.0539098	0.668077	0.668077	TTACAGTGTTTCGATCTGGA;TAAATTTATAGGTATCCGTG;CTAAGAATTCAGATCACAGT;ACAACAGACTCAATCAGCGT
GPR20	4	2653;2946;21511;22639	2	2.09501	1.0012	0.0518452	0.663429	0.663429	TATACATATGGATTCAAAAG;ACTTAGTAAATCTGCTACTC;GTGGATGATCACTTAATACG;AGGGACTGAAAAAAGCAGGT
CARD14	4	194;13470;17030;55597	1	2.00238	1.00119	0.0616223	0.68892	0.685222	GAGGCCGGTGGCTCTACAGG;TGCCCAGGACCAGCCCAGTG;GGAGCCCAGATTGCAAACCC;CAGGGGCAGATTCCCCTCCA
PYHIN1	4	2496;3035;25978;50824	2	2.0702	1.00085	0.0542213	0.669297	0.668167	CCTGGGCAGTCCCAGGGCAG;AGAGAAGTCCCTCTCCAGTG;GGCACCTCCTGTAGAGCCAC;GAGCAGGGGCCAGAGACACT
GOLGA6L10	4	756;5521;23917;29086	2	1.58	1.00039	0.144811	0.801626	0.7989	ATAACGCCGCTCCCAAGCCG;ACAAACCTGCTTCGCTCCCT;AGCAGGAGTCCGGAGTCGGA;GAGTCCTAACCCAGTTGATG
STAT3	4	195;43151;45753;51076	1	2.00016	1.00008	0.0618854	0.68576	0.685395	GGTGAAAGCAGCAGTAGTGG;GCTTCGTGCACCATATCCGA;CAGGGACGACTATGACAAGA;CCTGCCGCGACACCGAGGTG
KLHL25	4	607;6212;9305;76344	1	1.51397	0.999977	0.166945	0.809349	0.808072	CGGCACAGCACGAAGACCAG;GCTGCGGGACTTCGCACGGG;CGAGCCGCCCTTCCAGGCGT;GAGATGCTGCGGGACGTGCG
CCT6A	4	1362;4094;10322;41013	2	1.82267	0.999508	0.087545	0.75452	0.75452	CCTTGTACAGATGCAAACGG;TCTTGTCCAGAGACAGAGTA;AGTGGTGACAAGCAATCCAG;TGAACTTGAATGTGCCGATG
GDF10	4	1593;3790;45899;66250	2	1.8861	0.999291	0.0771585	0.730101	0.730101	ATGACTGTGGTTGACAACCA;AACTTACCGTACAGACATGC;TGAATCATCAAGGCAATGAA;ACCACAGTCATCGTCACGAT
PXK	4	196;27763;39609;72457	1	1.99796	0.998978	0.0621415	0.687386	0.685395	GTGGGCCGCGCCACACCCCG;CCCACCAACCACGCTCAGGA;AGACACGTGAGCACTAACCC;TACCCTCCTGGAGTCTACAC
NEK11	4	779;5468;33238;59113	2	1.58774	0.998761	0.142471	0.803544	0.7989	TTAAGTACTTGGCAACACAG;TTACTAGTGACAGCAAACGA;GGACATCCACCTATTTCAAC;GTTTCCTTCAATTTCAGTTG
ASB13	4	197;28045;50072;69715	1	1.99576	0.997882	0.0624002	0.686621	0.685672	TCTCATTCTCAGGAGCACAT;TTCTAGCCAAGAGGTCACAA;GAGAAAACCTCTAACCAGCA;GGAATAACTAACTCCTTCAA
ZBTB8OS	4	2016;3399;34277;37032	2	1.97607	0.99762	0.0647694	0.69091	0.689854	TCCTGTCTAACACTGGACAG;TCCCACAAGCCCCTCAACAT;GCTCAATAGACAGAAACCCG;CAGGCCATGGATCTCCCACG
CDR2L	4	713;5758;13537;36281	2	1.54636	0.99741	0.155635	0.7989	0.7989	TCCTATGTATCACTGGAGAG;AGAGTGTCCCCAACACGAGG;TGCCAAGCAGTACCGGAACG;AGCTACGTCAGGGTTACAGG
UXT	4	2705;2960;14225;36476	2	2.09106	0.997375	0.0521654	0.664818	0.664818	AATGCATTTGGAACATTGTG;CTGGCGACATTCCTCTTACA;ATGAGTTAACAGGTTTATCT;TTGGAATGTTATTCAAGCCT
PCDHGA9	4	694;5844;45774;64932	2	1.53452	0.997268	0.159683	0.807151	0.806013	TTGGTGGAAAATAACTCCAA;GTATTTATCAGGCTGAATCC;GAAAACCTTTCAATGAACTG;AAAGCACTAAATGCTGTCCG
C1orf146	4	198;12529;44970;52003	1	1.99358	0.996791	0.0626535	0.687002	0.685672	GGAACTTACATTCTGCAGAA;TTTCAGCTATCAAACTCGAA;GAGCAGTCCATCTTTAATGG;GCAAGCAATGCAATATCCCA
PMF1	4	1541;3890;20141;43170	2	1.86466	0.996651	0.0805163	0.738517	0.738517	GCAGTAATCCAGCTTTCTGT;GCAGGATACCGGACCAGCAC;CTCAACCGATCTGGTAAGCG;CACAGTCAACCACAAACCAA
RHOG	4	2290;3214;11326;14737	2	2.02252	0.996234	0.0593218	0.681387	0.679299	GTGGTCTACATCAATAACAG;AAGGTGCATAGTAAATTTCA;GAATCACAGTAGAACAGTGA;AATTGGCATGTGGTCATGGG
POLG2	4	2185;3289;10562;15393	2	2.00336	0.996036	0.0614478	0.688193	0.685222	AGGTAAAAAAGAGTGTCAAG;CGTGGCGTGCAGGACTCGGG;CAAAAGTTAAATCTACTACA;ACAGCCTTCATCCAAAATGG
PTPN1	4	199;7942;8071;13796	1	1.99141	0.995705	0.0629128	0.687446	0.685672	CCCCTACGCCGATTTCTGGG;GGCGGTCCCGCCGATCGTGG;GCGCTGGTAGTTCGAACCCG;CATAGATTCGTTGTGTGATG
ZMYM2	4	1997;3439;48321;53997	2	1.96638	0.995651	0.0658852	0.694558	0.694398	TCTCTATCAGTTTAGCAGTG;AATAATCCTGCCCCCCAACG;AAGGCTCATTCTCAAGTCAG;ATGGTCCAAAATCTCCCAGG
NBPF15	4	1857;3564;19609;35438	2	1.93684	0.99552	0.0697553	0.710328	0.710328	GCTACAGGACTCTACTATGG;TTTACAAACTGAGTATCCGG;GGTTTGTCTTAAATATGTCG;CTGACATCTGCAATCTCTTG
CKS2	4	595;6413;40786;46218	1	1.52244	0.994398	0.163922	0.809051	0.808072	CCAGGACCTGAGTTGCATAG;CATACTAGGATCTCCTGACG;GGAATACAGACTGTAGTCGT;CTTAGGACCAGCTTTATCCA
GMPR2	4	705;5859;70530;71573	2	1.53248	0.994372	0.160412	0.806293	0.806032	TTGTCCGAGCTGAGGCAAGT;TAGGTCTAATGACTTGGCAA;TGGGATTCAGGGTACCCCAG;GCTCCCAGTGAATTAGAACG
KIF3A	4	1022;4828;29520;61362	2	1.68817	0.994313	0.115319	0.790132	0.783895	GCATGGTCCACAGAATCCAA;TGAAGAAAGACACATCGCCC;CCAGTGTGGCCCGACTGATG;GACAGAGATGTATCAAAACA
PDS5B	4	1343;4208;7845;28569	2	1.80017	0.993932	0.0916473	0.763687	0.762842	GCAAGGAAGGAGAACAGGCA;AGGATATGCCCAGCACCAGG;AAAAGATACTCACCATAGCA;CTGCAACTTGACCTTCAGGC
RPS9	4	2386;3179;9640;43807	2	2.03162	0.993878	0.0582965	0.677037	0.677037	AGAACGAGGAACACTGCCCG;AGTGCTGAAATCCTGGATGT;AGCACTACCTGCAGAGTAGT;TGTCCATCTGCTCTTCCGAG
GFM2	4	201;14173;14349;18679	1	1.9871	0.99355	0.0634393	0.68604	0.68604	CTGGTCGATTAATCTTCGGT;CAAACCGTACACATTTGGTG;CAGTCCTGTGAACCTACAAG;GGTTTATCGATATCACAGGA
ECD	4	2111;3404;13315;21284	2	1.97486	0.991096	0.0648436	0.69053	0.689854	GTCATAGAGCGCGGTAACGG;TAACCTCACACAGTAAACCA;AAAGTGATGAGAATCAACCT;ACATGGCCATTGGATAAGGG
TUBG2	4	204;33350;41155;52814	1	1.98072	0.990359	0.0642214	0.689749	0.688867	GAGATGCCGGCAGTTCACTG;GCTGCAGACCCGATCTCCTG;AAGTACAGATGGTTGCGCCG;AAGCGGTCATCACAAAACAC
DPH3P1	4	205;42706;58093;68440	1	1.97861	0.989305	0.0644685	0.690044	0.689854	GTTCCAGAAAGGACATCATG;TTTGGGGGTAAACTGCACCT;GTGCACGGAAAGCCTTCACA;GCGTAGCATCCGGAAACATG
ANKRD36	4	872;5357;29268;42388	2	1.60421	0.988453	0.13752	0.799298	0.798519	ACTATGCATACCTCTACAGC;GATCTGGCGAGAACACTGTG;TCTTGCAGCAAATCCATCGC;AGGGCGAAGGTCGTATTGAA
TRAPPC6A	4	206;17706;20025;55972	1	1.97651	0.988257	0.0647412	0.691784	0.689854	AGCTCAATATCGTCACATGA;GCTGTGATGACACCCAGTGA;CTGACATCACTGGATGCAAT;TTACCTGAAACAGCATTGCA
MRPL41	4	2077;3474;11133;20176	2	1.958	0.987631	0.0670612	0.697592	0.697592	GAGTAAAACACTGTGAGATG;AAAATCCACTAGGGTTGGTA;AAGGTCACATCATCCCGAAG;AAACAAGAAATGTAATGCAA
NEK3	4	207;34067;36975;54176	1	1.97443	0.987214	0.064986	0.690875	0.689854	GCTGTACGCACAGGGCCCAG;TGGTGACGCACAGGGACAGA;AGAATTCCTGCAATTCAGTG;GGGAGACCTCTGCAATGCGG
NEK7	4	1443;4161;39080;43203	2	1.80937	0.987172	0.0898902	0.759113	0.758569	ATCCATTCTCCAATCACACG;AGAATCTTGAGAGAGCATTG;GGTCAGTAGAGCATCCAAAG;CAGTCTAAACAAGGGAACCG
OGFOD1	4	1108;4756;33462;53245	2	1.70036	0.987169	0.11236	0.793212	0.783895	CAAGGCAGGCAGATCACCTG;AGAAGCAGAAAAGGCAAAAG;GGGAGCACTTCGAAAACCAC;CCTCCCATGAGGGAAAGTGT
POLR2I	4	1938;3602;8001;62610	2	1.92807	0.986884	0.0709973	0.711445	0.711445	GCGACCGCCGCAGGTTTGGG;CCAAAACATCAAATCTGTGT;CCGGCAGGTGGTGATCGAGT;CATGGCTGTCGCCTCCAATG
KRTAP5-8	4	208;19211;29685;30569	1	1.97235	0.986176	0.0652491	0.691333	0.691333	ACGAACAGAGAGACTCCCGG;AGTGGGCAAAGGCTTCCCAT;GAGCTGCTAAGGGAAACCAA;AACAAGCTTAGAGATTACCG
ATG14	4	1248;4500;18927;23400	2	1.74536	0.985743	0.102413	0.778063	0.778063	AAATAAAGAGCTCTCAGGCA;TTGGCGCAGTAGGACGCGGG;CAACACAGACCATTTAACCA;CTGATACTCTTGTCGTCTGT
WHSC1	4	629;6433;28652;49995	1	1.49889	0.985726	0.172441	0.80854	0.808072	GGGGGCGTTTCCTACACGCA;CCGCGAGTATTTCTACTACG;CCTCCGCGCCTCTCCTACTG;CGCCTGAGACCCAACCGCAG
VPS25	4	1462;4159;8559;10522	2	1.80976	0.985519	0.089852	0.759811	0.758569	CAGCCAAGTTTGGGACAGAA;CTCACCGTGACGTGTAGAAG;CAGATGCGAGTCTCTCCCAG;GAAGAATGAGAGATCACTGT
SPATA2	4	2699;3102;53641;58498	2	2.05202	0.984647	0.0560577	0.670877	0.670877	CCACTGTGTCTCTCGACACA;AAACGGTGTGATGAGAGGCA;AGTGGTCAACTGGAGAGTCA;CATTCACAGGAATCTCAGCA
DENND3	4	210;35290;43029;68902	1	1.96823	0.984115	0.0657578	0.69438	0.69438	GCATTGACCATCGATTCTGC;GCGTGTGCCATGGAGACTTG;AGTCATCAAGTACATCATAG;GACCTAAGCTGCCAGAAGTG
RPL36	4	1796;3778;9572;11798	2	1.88871	0.983962	0.0766958	0.727915	0.727915	TGGTGAATGACATGACATTC;TGGAGACACCAGTCCAGCTG;TATTTCACTTAACGAAGCAC;ACATACTGAACATTGAGGAA
PRDM15	4	604;6623;20698;27283	1	1.51608	0.983804	0.166182	0.810024	0.808072	GAGTTAGGGAGCACGTGGTA;CAAATGTTAGCTGAGCAGAT;CCGCCCGATGGCATCGCGGG;ATATCCGTGCCACGCCAGCA
KRTAP10-7	4	211;13916;20058;41937	1	1.96618	0.983092	0.0660145	0.694756	0.694398	ATTTGCACCGACTGAGCAGG;GGAAAGGGGCCTCGCTCGCA;TCGGCCCCCACACCCCCAGG;GTGGGAGAACTGGCGGACAG
DMTN	4	1071;4924;10843;60472	2	1.67222	0.982494	0.119191	0.785812	0.783895	TCAATCCGAAGCGTTACCTC;GGAATCTAAGATGTCTACCA;GAGGATGGCCCCTCTCAATG;GAACACGAGTAGGAACACCA
NXF1	4	2799;3086;8404;70980	2	2.05632	0.981397	0.05571	0.671835	0.670877	CAGGCTTGGAACCAGGTCCG;AAGGGCGAGCCGGACCCTAG;TTGGGCCGATTCTTAATAGG;CAAACAAACCCTCGCTGTCA
MCM3	4	530;7200;16613;23960	1	1.57158	0.98049	0.147488	0.8072	0.7989	GCCTAGAGCCTTCCCCCGAG;GCTCCAGGAGAAGTGCGCCG;TCTTCGTAAGACTATCCTGG;GTGTATTAGAGCACTGCCCA
ZNHIT3	4	214;16755;22517;31845	1	1.9601	0.980051	0.0668036	0.697221	0.697221	TGACAGCGGAGGCGTACGGA;TACAGAGGGAAAACATACAG;GGTCACTGTCGCGTAGTACG;AAATCCTTGTAGCAGATACG
SOCS4	4	1239;4614;19275;40446	2	1.72499	0.979949	0.10677	0.784604	0.783895	GGTGATTTCGGCTTAGAAGG;CAGGAGCACCGAGATTCTTG;CATGTTCCGCGGCTACTCTG;AACAGGTAAGACGCCCCCCG
ZNF439	4	1076;4975;26764;71443	2	1.66388	0.979069	0.121271	0.783895	0.783895	GGATTTCTCCATTTAGAGTG;TTAACACATATAATCCGGAA;GCATACATGACTTGCCGGAA;CTTTGATGGAAACTGGAATG
TPP1	4	215;23712;34202;70875	1	1.95809	0.979047	0.0670445	0.698575	0.697592	TTGATTATGTACAACTACAC;AGCAGTAGGGAGGGTACACA;GCATGGAATTGAGGATATCG;AAGTTCAGAGTGTTATGTAG
SLC13A3	4	588;6850;12907;62654	1	1.52746	0.978772	0.162135	0.807848	0.807553	GCCATCTCGCGTCTAGCTGG;ATTAAAAGTAAAAAGGGGTT;AAGTTATGTAACTCACAGGC;CTATGTGAGAAACACCACCC
BOLA2B	4	749;6024;18082;55892	2	1.51036	0.978484	0.168247	0.810034	0.808072	TTGTAGCCTTGGAACTCGAG;TGCAGCAGGCCCCCACACGA;GGGAACCCGAATGACCCGCA;TGGCACTGTAGCGAGACTGG
GPX2	4	216;10039;66559;75875	1	1.9561	0.978048	0.0673047	0.698968	0.698968	AGCTCTCTTAGGTTGAAGGG;CTGGTGTTCTGACCCCCCTG;CCAGGCTGGTCATATCCGTG;TTCCTATGACAGCTTGAGTG
RNF207	4	1066;5021;59509;67351	2	1.65644	0.977883	0.12324	0.79012	0.78756	CAACGCGGGTACGATGTCCG;AATGGACTCTGATATGGAAG;TTTAGTGGAAGTGTCACCGG;TGAAGTACCTTTAACACATC
CASP2	4	2948;3054;24564;25866	2	2.065	0.97765	0.0547522	0.669276	0.668316	GTAGTGCAGCAAGTAAACGG;CTGGAGAACCTAACCAACGG;TGAAATGATAATCAGCCAGG;GTAATCGTGGTCAATCGGAG
ADAMTS15	4	1251;4639;55024;76795	2	1.7206	0.977157	0.107769	0.786424	0.783895	GGCCTTCAGAGAATTCGACA;TCTCAGCGAAGCCCTTGCGC;GGATAGATCACTGCGACCAG;GGAACAGACCAGCTACATGG
SCRT2	4	217;58913;63006;74459	1	1.95411	0.977054	0.0675756	0.700622	0.700622	GAGTTTGACCGAGACCGGGA;TGGCTCGGCTCCCCACCAAG;GGCCGTACATACGAGTTGGG;GATCTCGATGAGCTCCATCT
ALYREF	4	600;6827;9786;14821	1	1.51889	0.976795	0.165186	0.810197	0.808072	TCTCACCTTGTACGACGGTG;CGTCAGTTTCATCCTCGGCG;GTTTGACCTACGGACGCTGA;GCGCTCCAGCCACGTACGAG
RPA3	4	2052;3636;8998;15008	2	1.92031	0.976679	0.0720629	0.71415	0.71415	AGTCGTTCCAGTATAAGACG;ATACTCACTGGGAACGACCG;TATCACGGGATCGAATCGCA;GTGCCACCTACCGTCCAAAG
ABCA9	4	218;47389;53830;62079	1	1.95213	0.976064	0.0678221	0.70202	0.70202	AAGACACCACATGTCGATGT;CCACGGTTGAGTCCACCAAG;GTCCACGTGAGTATTGAAGT;AAGGTATCAAAATTTGCCGA
MED30	4	1882;3807;29398;43836	2	1.88241	0.975585	0.0776991	0.73191	0.73191	CTGACCAGGAGTCTCGCTCG;TCATAGTCCAGACCGCAAGG;GGGATGCCAATGGGTCCCGC;CAATAAATCGGACTGTGCCG
NRM	4	861;5686;10566;59364	2	1.55641	0.974296	0.152347	0.805722	0.7989	TGGCGTCTATGAATTCACGC;GCGGCCGTACTACCAGACGG;TGTACTTGCGTCGCACCCAG;CGATGCCAACAGATCCGACA
C2orf72	4	1293;4613;17052;56698	2	1.72517	0.97414	0.10675	0.785375	0.783895	GCTATACATTCATAGCACCA;TTTCATCTTACTGTAAAACG;AGTTGTCTACTACAATGCAA;ATAATATCGAGCTAGGCCAG
SMCO2	4	220;32317;46268;63774	1	1.94819	0.974097	0.0683434	0.705093	0.704904	GCTTGGTACAAATCCGCCAG;AAAGGCATAGAACATGGACG;TTCGAATTCACCACTCAGAA;AGCCGTGGTAACCGACCACT
TUBGCP2	4	1414;4424;10298;18094	2	1.75925	0.973242	0.099595	0.776371	0.775667	GACTACTGGTTATATTCCAG;GTTTATATATCAGCCAACGC;AGCAGCGTGACACTGAGGAT;ACACAACGTCATTCTCAGCG
HIST1H4L	4	1013;5246;37478;75339	2	1.62106	0.973173	0.132684	0.794715	0.794676	CCCACCACGAGAGAGAGGCC;TGCTGACCGCGATACCCAGG;AAGGCCAGTATCGTCCGGTG;CTTACTTAGAACATTGACCG
GDAP1	4	221;26436;32620;61993	1	1.94624	0.973121	0.0685979	0.705402	0.705402	CATCTCCAGCATCAACGACG;AGCAGCGTGTTTGGTGCGTG;CAATTTGGTGACGGAAAACA;CAAAGAAGCAGACTCGCCAG
GINS3	4	2897;3132;42339;44163	2	2.04401	0.972881	0.0570026	0.674478	0.674084	GACGACGGGACCCCCCACCG;GATGGTCATGAGGCCGAAGG;CCCGCGTCTACAAGTCCAAG;CGTGTACATCTCCGCCAACG
OR13J1	4	1463;4360;10183;26921	2	1.77115	0.972556	0.097266	0.770646	0.770646	TCCACGGGTATTCAATACAG;GAAGGTGTGATCCTATCCAT;CCCAGGAACTCTGTGACAGG;AAGTCAGTAACACACCATCG
ERH	4	2638;3279;10612;18772	2	2.00589	0.972226	0.0611693	0.688758	0.685222	ACTAATACTCAATTCATGCC;ACCGAATGGTTGTGAGTGGT;GATGGTATAATCTTAACTGA;GATGAGAATCCACTAATCTG
SDHA	4	2368;3461;29782;67209	2	1.9611	0.971364	0.066613	0.697549	0.696853	TGTTGACGTGTGCTGTCACG;ACAGACAGAGAACGTGACAG;GTGGACCGTAAGGACGACGG;TTGCCTAACAGACTCCCCCA
CEP128	4	223;56744;57955;60317	1	1.94236	0.971182	0.0691156	0.709564	0.708736	TCAGGAATCCAGGAATGACA;TCTGCAAATACAGACCAACT;CTAAATACAGGTTACTACAC;GAATGCAAAACTTAAACAGC
EPPIN-WFDC6	4	599;6997;57227;72898	1	1.5196	0.970607	0.164928	0.809566	0.808072	CATAATCCATGGACCTGTCA;GCACATAGTATAGTTGGACC;TTACTGAGAAGCAACGCTTG;CAGCAGTTACCCGCATACCA
REEP4	4	514;7607;31382;44384	1	1.58462	0.970599	0.143451	0.803301	0.7989	GTGGTGAGCAGTAATGCTTG;GGAAGTCTGACAGGTTGTCA;CCGTACAGGTAGTTCCGGGC;ATAAGCCTCACCACGCAGCA
AMT	4	224;7932;25903;76601	1	1.94044	0.970219	0.0693685	0.709841	0.709841	CCATCATAGTCAAAAATTCG;GGCATTCCGAGTCTTTGACA;CTGACCGAAGAACAGATTGC;AGGAACTTGGAACTGTCATG
SMAD7	4	1354;4588;8509;23200	2	1.72959	0.969288	0.105864	0.786219	0.783895	CCTGCAGCTCTGCTTCAGTG;AGATGGCACTATCACCACCA;TCTTCCCCCAGAGTTCAAGG;TGCTTACCTTGTCAAAGACA
RAB10	4	2936;3155;32350;32406	2	2.03792	0.969144	0.0575774	0.676184	0.674084	CTGTCAGACAACCACCGACA;AATGGGAGTTTACCATGAGA;GTTCGACGAAGAGGGCAACG;AAAGGGTTCTTCAACTGCGA
SNUPN	4	1140;5028;41081;53417	2	1.65531	0.968212	0.123508	0.788616	0.78756	TCTCCATTGTCACCAAATGG;CTCACCTGAGAAATTCCGTG;GTCCTTCGCAAAGAGGCGTA;TGCAGAGCTTGACACAGCGT
RSC1A1	4	227;29808;36806;38832	1	1.93471	0.967355	0.070148	0.71202	0.711445	CGCTTCGGCGCAGACCCCGA;GTTGCCCGCGAAGAAGGAGT;CCCTACAGCGAAGACAAGAT;CCTCGGGGTCTGCGCCGAAG
OR2T34	4	1487;4410;53945;59404	2	1.76184	0.967234	0.0990727	0.775186	0.775186	TCAGTTTGACCACATTCACG;AGAGCCTACTAGAAACGGTG;AGGCTGGGCCTTATGCCACG;GGCCAGCCTCACCACACCGT
PABPN1	4	2625;3347;17510;52045	2	1.98886	0.967189	0.0632098	0.687106	0.685672	TGGAAGGTTTGATGTCACGG;ACGTGGTGAGACTCCACTGT;TGTTCGAACTGGTCAACCAA;GAGACAGCTTGCGACCGGAG
PLA2G10	4	2852;3223;14336;21659	2	2.02019	0.966948	0.059578	0.679362	0.679299	CAGTTGGGTCCCCTTTACCT;ACAGCGGACTCGGTCCAGAG;TTGAAACGGAAGGAACGCTG;TTGACATCACTACTGCACTC
CNOT3	4	1986;3832;17285;19223	2	1.87702	0.9666	0.0785178	0.736309	0.736309	TCTCGCATACCACGACCACA;GGCCTACATGCACGTCGCCG;TAGCAGCCGTACAAGCACTA;GATGCCCACGGTGAAAACGG
FAM228B	4	228;25456;29822;50442	1	1.93282	0.966409	0.0704006	0.713431	0.711445	CATCCTCTACAATCGCAAGA;GGAGGTTGACCCGCTCAACG;GAGGTCAGGGTTAAAGCTCG;GACACCAGGCTGGACAAGTG
WDR47	4	2992;3160;49003;52965	2	2.0366	0.966296	0.0577758	0.675987	0.674084	ATAAGGAGTTGCATCAAACG;AGTCTAGGGCTGGTCAACTG;TGGATGCTGTAGTTAGCACA;GAGATCACCCTTATTGCAGG
C14orf178	4	715;6468;14560;32162	2	1.45401	0.966232	0.190065	0.81849	0.816646	GGTGAACGAGAACCCGGAGT;GTCAGGATCACCTTCCAGCG;AAGGACGAGCGTCTGTACGT;CAATGGGAAACTCTACTCCG
PLA2G2F	4	1520;4381;43794;57998	2	1.76723	0.96604	0.0980221	0.770804	0.770804	GGAGTTCCATACCACCGGAC;TCGGTTTGTATAAAACATGG;AAGATCAGTAAAGAGATTGG;TGTTCGCGCAGATTAATCAG
PTGFRN	4	605;7084;35518;37022	1	1.51537	0.965978	0.166448	0.809437	0.808072	GCTTCCATATCACATTGGAG;CATGGAAACACACTCCACGA;GGTGGCGAGGACGCACAAAG;TTACAGATTCAATACCGAAG
LPPR2	4	884;5814;28264;53793	2	1.53863	0.964682	0.158231	0.806298	0.806013	AGACGGTCATCGATCACCAC;TGGACGTACACCATGCGGGA;TTCCTGTGAGAGTATAGGCA;CAAACTTACCTACTATCCCC
PRKCE	4	230;56738;63521;77159	1	1.92906	0.964529	0.0709142	0.711747	0.711445	ACTGCAGAGCATCGGCCGTG;GTTTCATCGAAAACTACGCA;GCTCCATCAATGATAAATCG;GTCACGCCTACTCTGTCACG
PSMA4	4	2951;3204;45053;67531	2	2.02511	0.964222	0.0590415	0.680656	0.679299	CATCAGTGACGGCGTATGCG;GAGCCCATCGACCTGACCGA;TCTACTATAAGGGCACGCCG;GAGGACCCGCGACAGAACCG
MFGE8	4	231;30479;43918;65974	1	1.92719	0.963596	0.0711751	0.712091	0.712091	AGACGCGATCCACAAATGGG;GGAATATCCCGGCATAACCA;CTTTGTGTGGAAACGACCAG;ATAGCCGATTGTCAGCACAT
CTDP1	4	2900;3253;46810;48019	2	2.0125	0.962246	0.0604046	0.682593	0.681845	TGACACATGTCGCAGCATGG;GTTGGAGTAATGTGTGCGTG;GACTCCGCCTAGGATGCGCA;GCTTGGAGGCCTGATCAGCG
KRTAP5-5	4	2669;3382;63327;73057	2	1.98023	0.962163	0.064249	0.688867	0.688867	GGGTGATCGACAAGAAACTT;CAATAAAGAAGACAGCACGT;AGTGCCAATATTGTCCGAAG;TTTGGTATCATCCACAAGTG
RNPEPL1	4	233;18913;36932;37235	1	1.92348	0.96174	0.0717054	0.715119	0.713812	GGCCACTGTACACCCCGCGG;GGCACAGTGCCTGTCCCGCG;TTCCGCCAACTAGACCGGGA;TGCAGGAAGTGGGACCGCAA
THEM6	4	964;5633;21196;25059	2	1.56391	0.961021	0.149861	0.806142	0.7989	TTGATGGTAGGATCGTATCA;AGGCTTCCCAAATCAAGTCG;TGAGTATATGGAGTTTGACA;CAACATAAAAATCACCAAGT
TIPIN	4	1978;3919;13214;20266	2	1.85855	0.960981	0.0813845	0.739999	0.739053	TTTAGAAAGTTAGACAAGAC;GGCCAAGAAAAAGCTCACCA;GATCAAAGGACTTGGCAGGT;TGTGGTCATGGAAAAAGAAG
KIF5A	4	235;22038;25454;61352	1	1.9198	0.959901	0.0722237	0.714616	0.714616	TTTATGCTAAAACTATCGAT;AAGTAGTAGCCGAACGTCTG;GAACTGATCCATGTTATACT;ATTACAGAGCACGGTGACCT
SENP3	4	900;5868;13399;15973	2	1.53125	0.959718	0.160763	0.806124	0.806124	TAAATTTGATCACTTAAGGA;AAGGTATTGATAACAGAACA;TAATAATGACAATCTTCTCA;ACCTCATTAAATTCTCCAGG
AUTS2	4	1363;4743;11275;35039	2	1.70258	0.959377	0.111846	0.793147	0.783895	GGAGGTCAACTTGTAATGGG;GGAGATCCTCACATAGACTG;CAGGTCTCGATACTGGTCAA;CTGCTGGGATTCCATCCACG
LOC100131303	4	2963;3256;36861;42536	2	2.01173	0.959247	0.0604469	0.681845	0.681845	GGTTAGCGCACACTTCCATG;GAAGGCTTGATGTCTCGGAG;TGGAGCGCATCCACTCGCTG;CCCACAGGCGTACTCCGCGA
EIF2B5	4	2855;3322;26093;39115	2	1.99507	0.95844	0.0624464	0.685928	0.685672	CAAGGAGGAGAACTACGACC;CTGGCCCACAGACGCGTCCG;GGTAAGGTGTGATGCGTGAG;GTCATCCGCAAACGGAAAGT
TFPI2	4	238;14724;37503;45474	1	1.91434	0.957172	0.0729917	0.717694	0.717694	CAGCTGGAGTAATGAAGCCA;TGAGCGCTCACGGCTCCGAG;GACCACGTTGCCCCGCAGAG;TGCAGACTCCTTTGTAGACG
NCAPG	4	606;7325;8133;44002	1	1.51467	0.957052	0.166695	0.80876	0.808072	GAGTAGATGTCCAGGGCTCG;ACCGACCAGCTCCTTCTCGT;TGGGCACGGGTACCCAACAG;CCTGGACATCTACTCTGCCG
GOLGA8M	4	1713;4280;27293;68097	2	1.78629	0.956194	0.0942432	0.77	0.769588	CGCGGACCCGACTCTTAAGG;CGCTACAGGGAGAAGTGCGG;CGCACGGCGGAGAGGCGACG;GCGGCGCGGGAGAAACCACG
ANGPT4	4	240;13284;16720;45963	1	1.91074	0.955372	0.0734976	0.719292	0.719292	TGTTGCAAGAATTATGCATG;TGAGGAAATTCAATGCAAGG;ACTTCAGACTCACGACGTAG;GCTGCTATGACCATTAGCTG
NCOA5	4	613;7334;56106;59973	1	1.5098	0.955111	0.168457	0.810426	0.808072	GAATACGCCAAGTATGAGGG;CCAGCATGGTCACTATGATG;CCACAGCCTGAATCGCTATG;AAGATCGCGGCAGAGATCAG
ADCYAP1	4	3156;3215;16233;61380	2	2.02226	0.954747	0.0593359	0.680306	0.679299	CTTAATATGCAAGACTCTCA;ACAGACAAGGGTGCTGAACA;ATGGAAACAAAAGTCGGCAG;TACCATGAGACATGAACACC
PEX2	4	887;6033;58463;65006	2	1.50917	0.95439	0.168584	0.810413	0.808072	AACTCTAAAAAAGAACCGAG;AGTCACGGACTCCTGCATCG;GACTGCAACCTATATGCCTG;AATTCTCACCTGTCGACAGG
PNISR	4	1119;5348;13626;38847	2	1.60556	0.954203	0.13719	0.801828	0.798519	AGTTATCCAAAACACCAGTG;TATGCAAGAGAAGCAACGTA;AGTTTGACCATCTGCCTCCG;TGCAGCTCATCCGAATATGG
Non-Targeting Control-CACCATAGAACCTGAAATAC	1	957	1	1.90806	0.95403	0.0738185	0.720189	0.720189	GCCTGGACTACATTCCGCAA;AGGGGACTCGGAGACTGCGA;TCTACTGTGCAGTCATCGTG;CTACCTAAACACTAGAAAGG
FAM20C	4	1604;4458;62182;72188	2	1.75301	0.953995	0.100865	0.778543	0.777881	AGACAAGCCCAATAGCGAAG;CTCACAAAGACAATTTGAGA;GCTAGGGACACCCAAGTCAG;GAGAACCTTGCTGTCGAAGG
Non-Targeting Control-ACTATTTAATATTGGTAAGT	1	965	1	1.90444	0.952222	0.0743459	0.723089	0.723089	TAAAGCTATAGGCTTTGTGA;GGTCCTTCCCATCATATGTG;ACTTACCCCTTTGTCAAAGG;AGTTTGTGAAGGAACACCAA
RBM34	4	247;18819;47370;62292	1	1.89838	0.949188	0.0753198	0.726934	0.726115	AATACCCAGCTCATTAACGA;GAAGCCATCCAAGTACGACC;GCTATGATGACCAGAACACG;GGGAGCGCCTTACTTGACAG
C17orf77	4	653;7259;35789;75112	1	1.48303	0.948853	0.178455	0.813078	0.812136	GCTTCTCTGAGAGATAGCCT;TGTGACCAGAAGTATCAAGG;CGTGGAGCAGACTGTCCACG;AACTCATCTTCCGTTCCATG
ATG4D	4	2993;3371;44202;57583	2	1.98293	0.948363	0.0638316	0.686736	0.686736	GATAGTCAGATATCCCACGC;AACTGGAATGATACGCGCCG;TATCACGTAGCACACCCACG;GATGGTGCAACTCGTAATGG
PYROXD2	4	248;23856;73420;76035	1	1.89664	0.948319	0.0755815	0.728341	0.726115	TTCACCAGTTGACACTACAT;CTGTTTGGATCTCCAGACAA;TATGTCATAACTGGTCCACA;AAGCTTATCGGCTATAGCCA
ARL14	4	249;30461;56875;71925	1	1.89491	0.947454	0.0758339	0.728539	0.726115	TCTGATACAGGACGTTCAAG;ACTGGCAGTTATAACTCGGG;CACCATGTCTACCTTAACTG;GTAACCGTTCTCGTAGAAGG
NPHP1	4	952;5967;37251;41834	2	1.51792	0.947438	0.165502	0.809221	0.808072	CTCACCCATCGACCCGAGCG;CATGGCCAGATCGTTCCGTG;AATTTGGTCTGAATACATCG;CAATAACATCCAATTCACTG
BTF3L4	4	3168;3299;9583;15347	2	2.00084	0.947128	0.0617278	0.685222	0.685222	CATCTACAAGCCCAACAACA;TAAACACCTCAACGATGACG;GCACACCAAGGAGATCGACC;ATGTGATTGCAGAACCAGAA
EFCAB1	4	1401;4897;42296;53151	2	1.67667	0.946976	0.118144	0.787166	0.783895	TCTCGGGGTCGGCGTACTCG;ATTCCCGCAATGAAGGCCAG;GAGATGCGAGTTGAGCCGGT;TCAAAGGAGTGCGTAGTCAC
TMEM97	4	250;24268;27441;38535	1	1.89318	0.946592	0.0760937	0.727696	0.726115	GACGTGATCGCAGAGCCTGT;CAGTGGGACGCCCAGCAGCG;CCTACAGCTTTGACGGCGTG;GTACTTGGAGACAGTGAAGG
SPATA31C2	4	1358;4996;62582;70465	2	1.66047	0.945844	0.122213	0.787554	0.786747	CAGCCATGAAAACGGCCGTG;CAAGCTCACAGAGCGTGAGT;TGGGGAGTCCGGCATCGCTG;GGAATGACAAACGGCCGCAG
DNAJC17	4	251;15535;50256;71092	1	1.89147	0.945733	0.0763555	0.726882	0.726882	GCCGACTTACGATTTCCGAG;GGAGTCTGTGTTATCTGGAA;CCTGCCTCACCTCACACTCG;AAGTCGACATACTCTCGGCT
EBLN2	4	252;28585;42325;58782	1	1.88976	0.944879	0.0766106	0.728206	0.727915	CACCGCCGAGAAGGCGACCT;TTGTAGATCCTGGTGAATGT;CCGGACCGATATCCCCAGCG;TGCTCATCTCGGATGGCTCG
MSI1	4	1092;5612;33118;76727	2	1.5669	0.944696	0.148884	0.807106	0.7989	CAAGTGTGAGTTCTTCAACG;TCATTGGGGTGGATCCCGAA;AGATATTCTGAAGAAAATCG;ACTCCCCGGAGTCACACGTG
BCL2L10	4	804;6607;72911;74917	2	1.43724	0.944164	0.197109	0.821244	0.820508	TCTCATTAATAAAACAGACC;ACCACTGGATTAGCAGACCC;TTAACAGAAGAGAAACCTGA;TTGGTATTCTCCAGGGACAG
USP53	4	708;7075;25648;40195	1	1.44884	0.944133	0.192246	0.819459	0.819305	ACCACTGGATTGGCAGACCC;TTAGCAGAAGAGAAACCTGA;AGAAATTAAGAGCGACAATT;TTGTCCTGAATTGGTTCCCA
RNF183	4	253;34729;41072;55093	1	1.88805	0.944027	0.0768744	0.72851	0.72851	TCTCATTAATAAAACAGACT;AGCGAGGAGGAGGAAAAGTC;ACCAGGGTCTGCTAATCCAG;TTGGTATTCTCCAGGGACAA
USP17L30	4	3194;3333;9452;17664	2	1.99233	0.943261	0.0627363	0.686711	0.685672	TGAGGAAGAGGATCCTGCGG;GGCTGTTGGATCTGTGGATG;TGGTTAGTTACCTAAATACC;TGACTGGGATCTTGGCGCCG
KIAA1109	4	2469;3758;8101;62939	2	1.89308	0.94323	0.0761098	0.726744	0.726115	AAAAGTTCTCGACCGTCGAG;GAGACAGATAAATCAGAGGG;TTACAGTCAGAAAAGCCACG;GTTTCAGTGAGGACAACACA
ANO4	4	255;56605;69432;76337	1	1.88467	0.942334	0.0773913	0.731202	0.730727	ACACAGTGCTGACAATACTT;AAAGCTGGCAAAGAAAAAGA;AAACAGGCTGACAAACCAAG;AGAGCCTGAAGAATTTGTCG
PRR15	4	2490;3756;57140;64031	2	1.89352	0.942272	0.0759448	0.72738	0.726115	GAAGGTGCTAGACAGGCGCG;AGAAGTCAGAAAGTAACAAG;ACCCAGGGAGCACAATACTT;CAGAGCAATGATATCGCTCG
LTBR	4	1086;5708;40159;46529	2	1.55333	0.940936	0.15336	0.803635	0.7989	GCATCCGGAAGAAGCGCGTG;AGGTACTTGTGGGCCTTTCG;GCTGCCGAGTGGGCACGTCA;AGGAGAGAGACCGAGCATCG
ZC3H15	4	2289;3931;20989;31095	2	1.85603	0.940797	0.0818363	0.739824	0.739053	AGATACCTGACTCCAAGGCA;GTCCTCCTCAACACCCATAG;ACGGATTCACAACTACCGAG;GAGGCTGAACAAGTACCGCG
RELT	4	1151;5544;9776;14397	2	1.57666	0.94067	0.145841	0.803789	0.7989	TCAAGTTTAGACCAATGGGT;GAGAGCGAGAGCGATCACCT;CTGTATCATATCCAACACCA;GGGTCTGGTCCATCCAACGA
CTXN3	4	3060;3444;33844;55354	2	1.96518	0.939631	0.0660911	0.694398	0.694398	CCAGGCTTCCCGATCCACAG;ACAATGACTCGGAGCCACCC;TATTACCGGACAAAGCTGCG;ACATCCAGAAGACCCATGAG
IYD	4	911;6310;37725;39022	2	1.47356	0.938789	0.182112	0.813804	0.813804	CAGGAACATTGAGAAGCTAG;TTGGCGCGAGAAATGGAGCA;GCGGCTCTCCCAGTCGCCGT;TGCGTGACGTCGGGTCCGAG
GABARAPL2	4	260;22677;34698;62809	1	1.87632	0.93816	0.0786996	0.736914	0.736914	GTGGCTTCAGATGTGATGCA;ACAGAGGGTGGCTTCCTATG;CTGGAGCGGAAGGATAAGAT;AGTTACGGGCAGTGGAACAG
DRAP1	4	2417;3874;17201;67321	2	1.86805	0.937665	0.0800003	0.739179	0.738517	TGGCGCTAAACGAAGCCAAG;CGCAGCACCAGATTAACGGG;AGCTGACAGTATGCTTACAT;GTGGAGATGATCAAAGGCGG
GNB2L1	4	1914;4341;14874;16854	2	1.77472	0.937431	0.0965201	0.769588	0.769588	CGCTCAAGGATCAACGCGAG;TCTGGGGGCGCTGTACACCG;CCCGGAGGTCGGGATTGGCG;AACTGCGGTTCTCCACGAGG
IDO2	4	2228;4033;21951;59437	2	1.83499	0.93734	0.0854217	0.748542	0.748068	GATTGGTTCTCAATCCACAG;GATCAGGCTACACAACCCGT;TGCTGTGGGAGATACGACTG;GCTCAGGCCCAAGTACCGAG
EXOSC8	4	967;6151;10105;61540	2	1.49378	0.937213	0.174288	0.80995	0.808731	ATTTACTTACAATCAGGTGT;AAAATAAATTGATTCACAGC;CTGGTGATCATAATCATCCC;TGTTTATTATGAAAAAGCAC
TMTC2	4	906;6369;56519;61684	2	1.46619	0.937103	0.185049	0.817052	0.815941	CAGGAACCGCTATCTGAACG;CTGATCCAGGATGAATCCCG;GCCCGCTTCCAGGATGTGCG;GAAGCGTGAAAAGCAGGGTG
CCNA2	4	2397;3904;12958;60098	2	1.8617	0.936636	0.0808781	0.738601	0.738601	ACGAACGGTGTTGAACGCCC;ATGTGGGAAGCATACTGCAG;AGCTGGTGTCCACGCCCCAG;CCGGTTCTGGGGTCTTAGTG
LPCAT4	4	262;49631;55353;62240	1	1.87303	0.936513	0.0792205	0.737396	0.737396	GATGGCTGCAAGAACCACAT;AGGACAAGCAGAAACTCAAG;TGCGACTACGTGATCGTGAG;CCGCCCTTACCTGTAGATCG
PGA5	4	263;50037;55294;64444	1	1.87139	0.935694	0.0794785	0.738704	0.738517	GAGAGACCTAAACTACCGGA;CTGCAGGTGATGTATGACGC;TGAGCTGCGTTCTCTACGGG;GCAGCACCTCAGGGATACGG
KLF16	4	2407;3918;14827;15756	2	1.85876	0.93511	0.0813652	0.740895	0.739053	CCGCTGAAGTGACCAGACTG;GTCACTGCAAAATCAATTGG;GCGAGATACAAAAACAGTGA;CCAGAATCTGCATTAAAACG
ARL6IP6	4	264;13613;26879;29311	1	1.86976	0.934878	0.0797185	0.739839	0.738517	AAGAACTGGCCAGATCGCGC;AACGGAGTAAACGCAACAGG;TGGAGTTGGATATCTCCGAG;TGGTTCCCGTGATCCCACGG
KATNB1	4	2408;3927;10755;28092	2	1.85687	0.934427	0.0817695	0.741353	0.739053	CAAACTCATGAGTATTCTGG;TCTGTGGAGATGGTCTACAC;AGTGGAGGGTTACCTACGGA;AGTTCTGCAGATATGTCAGT
ZFPM2	4	265;61869;68190;75333	1	1.86813	0.934066	0.0799852	0.740128	0.738517	ACTGGGCGGCTAGTCCGATG;TTCGAGAGCCCAGGTTACGA;TGAGTCGCACAGCCGACTGT;TGTGCTCCGCCTCTTGACGG
ERMAP	4	1609;4792;53831;64856	2	1.69424	0.933983	0.113837	0.791194	0.783895	CAGCAGCAGCTAGTCTACAA;ATCTTAGCTCCTGGAGACAC;TGCGACAATGATAACAAACC;AGACAATTCACAATCCTCTG
L2HGDH	4	2931;3591;18349;23437	2	1.9306	0.933588	0.0706862	0.712876	0.711445	AGCTGGTGGAAGAACAGCGT;GTGGTACTTGGACTACCCGG;CCAAGACGTGCTCCACCCCA;AACACTAGGGGTCTTCCTCG
MDC1	4	266;12284;67391;74779	1	1.86651	0.933256	0.0802465	0.73928	0.738517	AAAAATGTGAAATTTATCGG;CACGATCACAATGATCGAAG;ATAGTGCCGTTAGTCAAGAA;AAGTGTCCTGGGATGCACTT
PAF1	4	1574;4869;35193;53886	2	1.68131	0.932658	0.116934	0.787455	0.783895	GAGTGTTAAGCCAGATACCC;GGTCTCTAGATAAAAAGTCC;CTATGAAACAGGCACGTCAC;AACTGACACTCACATATGCT
Non-Targeting Control-TTCTAAGCGCCCTGGGGACA	1	1056	1	1.86531	0.932654	0.080329	0.738956	0.738517	GAGCTGCTCCGAGACCACTT;GGATGAAGCCCGTCGAGCCA;GCCTTCGGGGGCAGCTAGGT;GAAGGGAAGGCCATATATGC
OR9A4	4	267;57527;62083;69657	1	1.8649	0.93245	0.0804878	0.739335	0.738517	TCACACCTTATATCAGCACT;GCGCATGATCGGCTATAGAG;AAGCGTTGGAAAAACATCAA;AGGATCCAAGAAAAACTCTG
TBC1D3K	4	1309;5354;16079;53306	2	1.60466	0.932281	0.13745	0.799631	0.798519	AAAACGACACAGAGAAAGGG;GAAGAAGAAATATACAAACA;AAAAGCGTCTTATACAAATG;GCATTTGCGATCTCAAGAAG
GJC2	4	268;24795;64782;66554	1	1.86329	0.931646	0.0807497	0.739578	0.738601	TCTCTTACACAATAGCCTCA;AGAATTTAAGAAACACAGAG;TTAAGTATCGTGATACTTCA;TACAGGAACAAAAGTATACC
SATL1	4	3032;3561;18918;55863	2	1.93753	0.931584	0.069703	0.710947	0.710328	TTTCACGCCTTTGAGCCCCG;CCACCGGCTTGACCGCACAG;GCGGCCGGTGATCGGAACCA;GCATCGTCGTCATCCTACAG
MEIOB	4	2819;3702;32940;68653	2	1.90547	0.930198	0.0741486	0.722287	0.722287	ACACATACTTACTGGCAACT;GGAATGTATAAAATTAAAGG;TTTAATCTCCTGATCCACAG;ACAGAACCTGTAAAGCTAGG
NT5C2	4	270;23655;30218;42214	1	1.8601	0.930049	0.0812514	0.740932	0.739053	TTAATGTGGTATATACGCCG;CAGTTACCTTATGTAATCGA;TCTGCCTACACTATTTACAT;AAAGGTAAAAATTGTGACAG
PGM3	4	1395;5242;8754;14842	2	1.62168	0.929232	0.1326	0.795725	0.794676	GATGTCTATGAGATGGAGGG;TCAATGATTTCCACTCTGGC;ATGTCCACCCCACCCAGAGT;TGGCAGATGAGGAAGTCCTA
Non-Targeting Control-GTTTTCAGTTGCCCAACAGC	1	1078	1	1.85635	0.928176	0.0818012	0.740572	0.739053	GCGCGGCAGCCCTCGCTCAG;GTCGCACAGCATCTCGACCT;ATAGGAGTAGTCCTGGACCA;AATTATAACCTCTTGCCTCA
DOPEY2	4	273;9877;62109;76953	1	1.85535	0.927675	0.0820203	0.739359	0.739359	AGGAAGGACTGATTCCACAG;GAATGTGGAGATCCAAGCTG;AGGAGATGAACAACTACCGG;CCCGGGCAATCACCACTATG
HMGN5	4	274;13191;58237;68317	1	1.85378	0.926889	0.0822663	0.740515	0.740215	CCTGGACTGCCTCAAACACC;CCATAAGATTCCCAGTGACA;AAGTGGGCACCAAAGTCCAA;GAAGCACTGTCTTTCACTGG
ASB9	4	2298;4138;14739;68756	2	1.81391	0.926239	0.0890914	0.758484	0.757999	CCTGAGAAGCATCTTCTGAA;TCTACCCTAAAAGGAGTGGT;GGTTCCTTGAAATAAAGTGC;CATATTTCATATACTCCCTG
ZNF790	4	275;34915;56502;75201	1	1.85221	0.926107	0.0825356	0.740816	0.740215	CCAGTGATTTAGAAGCTCTG;TACAGAGACTATAAGCGCAC;ACAGCAATTATACACAGCAA;GAAGAGAAAAAATCTACATG
TCTN3	4	1684;4829;50503;56584	2	1.688	0.925738	0.115338	0.789401	0.783895	TCTCAGTTGTCATCTATCCC;TCTTAGAACTCACTTACCTG;CCTCACAAACTGTAGAAAAG;TTTGTTGGATACGAAGTGAA
E4F1	4	2658;3881;23684;68164	2	1.86656	0.924807	0.0801199	0.739197	0.738517	CAGTGGCGGTGTGAACTGTG;ATACATATAGGAATTACTCA;AGTACATGAATTAAACACTA;TTCCAACAGCTTCCTTTGCA
SLC25A47	4	1017;6279;32187;74341	2	1.47746	0.924756	0.180577	0.813891	0.81336	CCTGGTGGTATTGAGGCGCG;AGAATGTGAGACAGAAGACA;TTCGTGGGGAGCGTTCGCGA;ACTGTTCTTCAAGCAACGGC
EFCAB13	4	1415;5295;41644;59264	2	1.61358	0.924586	0.134887	0.798017	0.798017	TTCTGGAGAGCTCATTAGTG;GAGATATCTCTAGGCGATGG;GATTGACCTTGAAAATACAT;TCCTGCTCGTCGACCTCGGG
TMSB4Y	4	277;28113;36125;62164	1	1.8491	0.92455	0.0830471	0.742226	0.742226	GCATTTCATCACAGCGCCAA;TGCCTCGGAGAACCTAAGGC;TGGTTCGGGAAGATGCCCGG;ACGTGAGCCTCGGTTAGCGA
ZCCHC14	4	278;21580;54330;76781	1	1.84755	0.923776	0.0833025	0.743452	0.743452	CAGACTGCAGACCACCCACG;GAGAACCATGAGCTCCGGCG;CTGGCCCACAGCCTCGACGA;AGGGAACTGGACGCCCTTCG
CCDC38	4	279;8994;51649;74907	1	1.84601	0.923005	0.0835635	0.744723	0.744723	TGGTCGATTACTATATCACA;GTCACATGTCAATATAAGAT;ATACATCTAGAAAGAACCAG;TCAAGCTAATACTGAAATGG
AGBL1	4	280;16082;19537;54854	1	1.84447	0.922236	0.0838147	0.745904	0.74501	GATGCTGGCCAAGCTCCATG;ACAGGCCAGGAGGCAAGCGT;GGCAGTGTTGAGTGTGCCTG;ACTGGAAGCTTGACATGGAG
SNRPF	4	2920;3754;15119;15372	2	1.89396	0.921856	0.075913	0.728186	0.726115	GACAGACTGGAAGCTTGACG;ATGGGGAACAGCCAGCACCA;CAAGCTGGACAAGGTTCCTG;ACAGGCCAGGAGGCAAGCAT
ARMC7	4	2940;3743;29636;54827	2	1.89638	0.921791	0.0756107	0.727507	0.726115	GAAGAAGAAGACATCAAGCG;CCTGATTGTAATAAAACACC;TGTTAAACGTCCCCGTAGAG;AAACGAACAAAATCAAACAT
LRRC15	4	820;7129;61226;69553	1	1.38697	0.921528	0.220158	0.83178	0.830415	TCACTCCCCAGGATTATGCG;AGCAACCAACAAATTCTGGT;CACATAGCGCTCCACCTGAG;GATGGCAGCTCAGATCCGTG
MCF2	4	282;30019;42758;75525	1	1.84141	0.920707	0.0843322	0.746281	0.74501	GTCACCCACATCCCGCACGT;GATCGCCCCAAAGCACTCAA;GGATATCAACCAGAAACTCC;GCTCTGTGTGCTACTAGATG
FAM168B	4	1697;4913;39591;45574	2	1.67403	0.920042	0.118723	0.786853	0.783895	GTTCGACTCGAACTCCACAA;GCGTCAGCAAGACCTACACC;ATTCAACTTCTTGGACGCTG;GACCGGGAGCTTGCTGACCG
FANK1	4	283;49524;57545;58021	1	1.83989	0.919947	0.0845868	0.745384	0.745384	AACTGGATATCAACTTAGAA;AAATCTGAGAGCAGAGAATG;GGATGCTATCAGGAAAGACA;GTTCAGGACTTGGAAACTCA
KDM2B	4	1742;4853;46797;61328	2	1.68398	0.919829	0.116339	0.786821	0.783895	ATGTTAGATACATTGGCTCC;AAATAATGGCATCAGAAGAG;AACAAGAATTGGAAGACATG;GAAACAGGCACACAAGTGTG
MAGEA12	4	1676;4961;36050;38365	2	1.66616	0.919101	0.12072	0.785182	0.783895	GAAGAAATTCAATGCTCGGA;TGGACTTCGAGGCTATGCTG;AAGACCGGCAGTACGTGGTG;TGAAAACACAGACTACACCA
ZNF780A	4	1118;6108;20859;24547	2	1.49935	0.918923	0.172241	0.808811	0.808072	GCGGCATCTAGAGAATGGAG;CCACGGCTGTGCGTCCACCG;AACAAGCCATCCGCATGCAA;GGCACCGAGACCCTCCAAGG
Non-Targeting Control-TGAATCGTAACCTCGCCATT	1	1125	1	1.83782	0.918909	0.084913	0.747211	0.745436	CTCGTGAGCCTGTGTCAAAG;TGAGGTCCACAGCCAGACAT;AGAGACCTCAAGTGACCATG;CGCAAGGTCCACACCATTCG
EPB41L5	4	2587;4021;30440;43433	2	1.83744	0.918606	0.0849486	0.745436	0.745436	ACGATGGACATTCGTCCAGA;AGGGTATCGCAGAGAACGGA;GCTGGCAAGATACATCCAGC;GATACCCTCAGCTGCCTACG
LUM	4	2345;4230;46601;63108	2	1.7959	0.917577	0.0924371	0.763183	0.762891	CCGTGCTGATTCGGAACAAG;ATCTCTTTGGAACTCTACCA;TGCAAAAGACCAGGCCCCCG;GCACCAAGTTGCTATAAATG
DOK2	4	3433;3542;49871;69780	2	1.94196	0.917424	0.0691477	0.708736	0.708736	TCTCTGCAGCACATCCACGC;TGGCTCCCTTGAAGTACTCC;GACATCTGAGGACTGCTCCA;TGCAGCTCGAGGGACCAATG
P2RY13	4	2279;4293;15556;39676	2	1.78381	0.917297	0.0947248	0.770928	0.769588	AGTTCCTCACGATGTACCCA;GAGCTGGCGGCCCCTCAGTG;GGGAAGTCCAGAGAACCAGC;CCCACAACTCACACTACAGC
SHQ1	4	2793;3898;17013;34962	2	1.86297	0.917222	0.0807815	0.738792	0.738601	TACGTGTGGCAGTTCCAAGG;GTGGCTGTATTGGAAGCAGC;GAATTCATAGCTTCGCACCC;ATACTCACATCACAGCCCGC
EPS15	4	287;10956;61102;74772	1	1.83387	0.916933	0.0856404	0.749413	0.748068	GGTGCAGAGGAGGACAGCAA;GAACTGGTTGCAGAGAGCCA;ACTCACGTGATGCAGAGAAC;ATTCTGTGGAATCTGCCGGG
GNPNAT1	4	1597;5125;7745;10208	2	1.63988	0.916877	0.127569	0.791232	0.790583	GAGGACGGCAAGGGCAGCAG;TGGACTCACGTGGTGCAGAG;ATTCTGTGGAATCTGTCGGG;AGCCATGGTGCAGAGGAGGA
NUTM2A	4	731;7730;13047;40851	1	1.43535	0.916707	0.197977	0.820508	0.820508	AAGCAGCCAGACATCACGGA;ACAAACTCGTCTACTTCAGG;AGATGAATCTACCAGCATAG;AAGAAAGCACTCCCTGACTG
NLRC3	4	1261;5791;57264;65810	2	1.54179	0.91646	0.157179	0.802893	0.802893	GTGGACTGGTTAGTTGAAGT;CTGAAGTCCGGGAACCCGCG;GCCTGCGTTCACCATTCATG;ATTGACATGTCCATAGTATG
SLC25A12	4	1865;4754;49379;51489	2	1.7007	0.916231	0.11232	0.793823	0.783895	ACTGCGACCAGAGATCGTGT;CAAACTCTCTGGCTATGCAT;ATTGACCTCTATGAAAGGGG;TCAAGAATACAATTTCAGCA
KRBA2	4	288;24769;49416;72570	1	1.83237	0.916186	0.0858881	0.748453	0.748453	AAAGTGCTCAAATCATGAGG;CTTGCTAAAGTCTCCAACTG;AGTGGTAGGCTTCTTAATGG;TTAAGCATACCAACAAAAGT
VASN	4	289;32500;37580;50822	1	1.83088	0.915442	0.086164	0.749818	0.749818	GATGCCAAAAACACACATGT;CTTGAAATATACCGTAGCAG;TCTGTTGAAGGAGCGCCAAA;TGTTCTAATTACCATGCAAG
RPL17-C18orf32	4	3302;3634;9059;22298	2	1.92077	0.915225	0.0720315	0.714967	0.71415	GGTTGGCATCGGGGTACGCG;GTGTTCAATGAAATCGTGCG;CGTGCCTCCGTAGGTCTGCG;AGAGGCCACGAACATGCAAG
Non-Targeting Control-AGTCTTGGCCAATGTCACGG	1	1149	1	1.82865	0.914325	0.086498	0.751683	0.751683	TGTCCAAAATATTGACAGCC;TTTGATTGAGGCTACCCCGG;TTCCAAATTGAGAAGGCACA;TACATTTACACTGACTAATC
IL37	4	291;37460;41727;61012	1	1.82792	0.913962	0.086683	0.75225	0.75225	CAGTAATGGAATATCACCCC;GCAGTCAGGGCAATTTGGGA;GTCCAAGAGGACTCTCCCGG;GATTCTCCAATATGGGATAG
MDP1	4	1626;5162;25702;40503	2	1.63407	0.912503	0.129122	0.793812	0.793007	AAGGCGACCTGGACGAGCGC;AGCCGGGAAAACCGCAGACG;CGGCGGGAGAGGAACGCCCA;GCGCCACAATTACTTCCTTG
KCNH3	4	293;49304;57525;62831	1	1.82498	0.912491	0.0872019	0.753631	0.753631	TTCGCTTACTTGCAAGCAGG;TGGAGCAAATAAACAGCACG;GTATGCCCATTACTTCCTAG;AAGCTGCAGGCAAATCCTGG
SYT8	4	1602;5212;49049;56656	2	1.6263	0.911928	0.131324	0.793371	0.793112	TGAACCGAGCGCCCTCTCGG;GATGGTTCGGAGCTTTGAGA;CCGACAGGTTAAGCGAGCCG;ATCCTGGATCTTTACTCACA
JPH4	4	294;35474;52095;67908	1	1.82352	0.91176	0.0874583	0.754808	0.75452	TGCAGGTGGCGATGGCAACG;TAGTTCTGATCAAGGATCAG;ATGTGAACGTAATCAAACCC;GATCAGGATCCCTCCCGTCG
SOX8	4	871;7182;57733;74855	2	1.37184	0.911156	0.227629	0.833446	0.832843	CTTCGTGAAGCACTCCATGG;CTGGAACCGCACGAAGACGT;CACAGAGACCGACCTCCGCG;GTGAAGCATCCTCATAAGGT
WWC2	4	3247;3717;49365;59736	2	1.90213	0.911122	0.0746679	0.725098	0.725098	TCACATTTAGTATCCAGCAG;ATACGGTTTATCATCACACC;GAGTAGTGGAAATTGGCCCA;AATAATTCTAGAGTAACTGT
SPP1	4	295;30147;75857;76427	1	1.82206	0.911031	0.0877256	0.755041	0.755041	AACTTGTAGTCGATCCAGAA;GAAACAGCTTCCACTCTCGT;CTGTGTAATAAAACCCAGAG;AAATACCAAGGAGTACAGAG
SH3RF1	4	296;24640;30022;41157	1	1.82061	0.910304	0.087973	0.755102	0.755102	GCAGCAAGCCATGACCACGA;GCTGATCATGTGCATCAGCG;CTCATCGCTAGGGTAAACCA;ACACGAGCCAGTACAAGGGT
MAP3K9	4	1918;4795;17866;47655	2	1.69373	0.910156	0.114019	0.790711	0.783895	TCTCATTGGACTGTACTTCG;AGCATGAGCCCAGAAGGGCA;ATATAAAGGACTCAAACGCG;AACACAGCAGAGCAGAGTGA
SLC29A1	4	969;6812;43663;64675	2	1.41322	0.91007	0.207815	0.82744	0.827028	TGGGTCGCCGGCTCTACGGG;GGCCCGTACTCCTCCCAGCG;TGACGACGCCGAGTCCTCCG;TTGCTGTCGAGGCTCAGTAC
LY6H	4	2570;4164;10958;13888	2	1.80878	0.909909	0.0900673	0.758569	0.758569	GAACGCCTAGCTCTTGTCAC;ATCATTGGTTACCATAAGAG;CAACCCGCTATGATGGTCTG;GTTGAACGTATTCTTAAGCA
KCNA2	4	297;31154;35047;46954	1	1.81916	0.90958	0.0882273	0.756251	0.756251	GCAGCAGATGCACCCAACAG;TGACATTGAGATTACACGAG;CTACCAAAGCCATCAGTCGG;ATGTGACCCATCCACGTATG
TUBB	4	2243;4453;8697;34423	2	1.75392	0.909433	0.100642	0.777778	0.777778	TGATTGCCATCGCAACAGGA;CACCCAATCAGAATAGCCGA;TCAGACAGCAAAAACCACGC;AATACAATGAGAACATCACT
KNOP1	4	298;37459;43638;59294	1	1.81772	0.908859	0.0884734	0.757327	0.757327	ACGTGCTAAGGACCAACCTG;CAGGGAAACACTTATAGATG;CTAATGACACGTTACAAGTG;CATCCTAGAATAATCACTGA
MORN4	4	299;25533;70112;72120	1	1.81628	0.90814	0.088743	0.758602	0.757744	AGACTTCATCAATATCTCGA;CGAAGACTTTGTAAAACTGT;CTTTGACTTGTGCATCCATG;AAGCTTATTGCTCAGGCATG
OR6P1	4	2268;4460;15310;43527	2	1.75264	0.907546	0.100903	0.777881	0.777881	ATTTGGCTAGACACCAACAT;TAAAATTTCTACTGGTCCAG;AATCAAATTTGATCCAACAG;TACTGGAGCGGATCTAACAG
PI4KA	4	3532;3626;13296;23899	2	1.92259	0.907433	0.0717707	0.714636	0.713812	GAATACCGAGATGTGCGAGG;AAAGCGGGAGGGAGTTAACG;GTTTCCGTGTGTCATAATGG;ACGTTGATGCTCATTGAGAG
FAM63A	4	300;32486;50126;56831	1	1.81485	0.907423	0.0890047	0.758774	0.757999	ATTAGTTCAGCCATGCTCAA;TCTGATGTAGAGGTGTGTAA;AAATCGAGGAGTTCTAGCTG;GTTTCTGCCATGAATATCAG
OR4F21	4	1437;5604;10450;12339	2	1.56804	0.907299	0.14857	0.807494	0.7989	AGAGGGTCATCACACACAAG;CTTGATACAGGTTTAATTCG;CTTGTAGATATCCTGATCAT;GTGCCACAAAGACCATCAAG
TRIO	4	1786;5031;52104;59192	2	1.65483	0.906752	0.123572	0.788226	0.78756	AGGAAGCCCTCATTGTGACA;TTGTAGTGAAGGGATACTAT;TCATCTGTCTACCTACAGCC;GTAACACCCTTCATCCTCCA
ELAVL1	4	301;8504;14440;27066	1	1.81342	0.906709	0.0892546	0.758845	0.757999	TGGAAGAATGTCCATTCCCA;AGATCTACCAGGAGCTGACT;GAGCCCAGCCAAGAGCGTGA;CTTGGATTCCGACAGACTCG
ESCO1	4	1644;5261;19562;21399	2	1.61876	0.905909	0.133378	0.796594	0.796239	TCTCTTTACACTTACCCACA;GTTAAGAGGTCGATCTGACG;AATGGCTATGGAATCCTGCT;TTCCAGGTTCCGAAACAATG
M6PR	4	303;49940;51759;53707	1	1.81058	0.905288	0.0897648	0.760097	0.758569	GTGGTCACGTTGCCAGTCAG;TATCTGTCAGCTGCCAGATG;CTGGTGCACAGTTTCACCGA;CACAGGGCAACGCATCCCTG
CD8B	4	2572;4241;17950;42691	2	1.79377	0.904807	0.0928875	0.762891	0.762891	CCTCATTGAAACCAGAGGGT;GGGAGACCTACATTAAGTGG;ATAGTGGCATTGAACCGTCA;ACGCAGATGTTTACTGGTGT
C17orf97	4	1670;5245;40011;66827	2	1.62122	0.904605	0.132666	0.795361	0.794676	GAAGAATCGAGTTTCCATCA;GTTCAAGTGACCATTAACCC;GATGCTGACAGTTATTGGTG;TTGACACCGCCACTTCAAGT
GDPD2	4	304;9617;45832;61360	1	1.80916	0.904581	0.0900338	0.759305	0.758569	AGAAATCAGTGTACTGACCA;TGCCTAGTAGGATATCATCT;ACGTAAGGGCTTACCCGCGA;CTTGATGTGCAGAAAAGCAC
CNNM3	4	2700;4150;27904;37210	2	1.81154	0.904439	0.0895635	0.759416	0.758569	GAACCAGTAACCATGAACTG;TGGGGTGATTATGAGCACCG;GGCCGGGTTCTAGAGTGCCA;GACAACCAGGAGAAGATCGG
KCNU1	4	2867;4040;37539;64193	2	1.83357	0.904067	0.0856739	0.748663	0.748068	TGAGGGCCCCCACACAACCC;TTTGCCACACAGATCACCCT;CATCCTGAGAGGTAACGGGT;CCAGATCTGCAGAGGCACGA
MECOM	4	3541;3675;19946;40335	2	1.91151	0.903423	0.0733193	0.719789	0.718802	GTCAATGCACAAGTTAGTGT;GCAGCAGGCAGACCACGCTG;GAGCATTACAACAGCCATCG;AAGCAATGTGCCTTTAAAAG
CALCR	4	3547;3676;41167;74757	2	1.91128	0.903139	0.0733331	0.718802	0.718802	CAGTGAGTGGTACCCATCGG;GATGTACTACTCATGCAATG;CTGCCAGGACAGCACTACTG;GAATTCCCAGAACGATGGAG
WARS	4	1984;4851;47187;66331	2	1.68432	0.9025	0.116171	0.787382	0.783895	GACAAAGCCCCAGATGCCGG;CTCCCAGCTCCAGATACAGG;TGATGACGCCAACAACGCCA;TGACAGCGCCCACAGCGATG
GMPPB	4	1930;4920;10118;68248	2	1.67287	0.90237	0.118984	0.78775	0.783895	CTCAAACTCACGGAGCAGCA;CGAGCAGCCCGACGTCGGGT;GCAGGAAGACCGGCACGAAG;AGGTTCCAGGTCCGATCCAG
GUK1	4	1940;4923;9333;41103	2	1.67238	0.901515	0.11917	0.786494	0.783895	AAGGGAACTCAGCTGAGTGT;GTAGATGCGCATGTTACTGA;AGCGTGAAGCCGGAAGACAG;CCCAGAGGGCCAGGAACTCG
PRR27	4	310;17508;30731;55846	1	1.80078	0.900388	0.0915752	0.765116	0.762842	AATATGTCTTGTTCAGTCAG;ACTTACCACCGACCATGCAT;TCGGTCCTAACAAAATCTTG;GCACAGTAGAAGCCGTATTG
SLC10A3	4	311;10572;32604;47563	1	1.79939	0.899697	0.0918308	0.763192	0.762891	CACCTGAAACGCCATCCGCA;TCTTACCGGAGGAACTAGGG;ATCCCCAAGAAACCCAGTGC;CTCCGCTCGCTCACCCGGGG
INHBC	4	1787;5188;43307;43515	2	1.63002	0.898408	0.130292	0.79324	0.793112	ATGACGACCCTGGATCTGGT;GATCTTGAAGACATAGTAGG;CGCAGGAAACCAATTGCTGG;ATGTAACCACCACGACCAAG
OR2B11	4	313;33745;48111;65715	1	1.79664	0.898322	0.0923675	0.764618	0.762891	GGTAAAGAGAACTGGTCTTG;TAATCTGTTCTGGATTGCTA;TTGAAGTAAGACACACACAT;AGATTGCTCTTATTAAACAT
SNRNP200	4	2949;4074;10215;40831	2	1.82669	0.89817	0.0868088	0.752303	0.752303	CTGCAAAGAAGACACAATCG;TCCACCTCAAAGGCATATGA;GAGCCATAAGCCGTTCCTGT;CCTGTCCCACCCCAGAATTG
SGTA	4	1521;5644;34711;37610	2	1.56235	0.897657	0.150365	0.804034	0.7989	ATGAAAAATGGTATAACCCA;ATACCTGAATGGAAGATAGG;TGGGGTCCTATAATAGAGCC;CCAGTGACAACATCGTGCGA
CD276	4	314;33973;43909;62563	1	1.79527	0.897637	0.0926154	0.763652	0.762891	TGCTCTAGATAACCGAACCC;ACGACATGCTTCATACAACT;AAATACTTGAAGGACGAAAG;TCATTACACAGCTTGCTAAG
HDLBP	4	1648;5431;18821;29659	2	1.59319	0.897056	0.14077	0.804782	0.7989	TGGGGAATATATATCCTCTG;TCCCAGAACTCCAATCCACA;GGCCAAATGTCGTCCATCTG;CAGTCTGTTCTGATAACCTG
ZNF44	4	315;9053;49085;75439	1	1.79391	0.896955	0.0928683	0.763732	0.762891	GGAATGGGGAGAACCACAAT;ACTCTTTGTAACCCAGAACG;AAGCGGCTGAGAAATATGCT;GTAGCCCCATTACCACAAGG
ACTB	4	866;7621;19588;33902	1	1.36404	0.896598	0.231615	0.835382	0.833967	GTTGCCTATCACAATATCAG;ACCGCCTCCGCCTATTACAG;GATATTTATCAATCTCACAG;GGCGCTTAGAGAATTGAGAG
TLR6	4	316;7913;19573;45900	1	1.79255	0.896276	0.0931223	0.763821	0.763821	CGCCCGTGCAGAATAAGCGG;TGGTGATGTTCCGAAGCACG;TGGATGTACCATCAGGTCGG;GGCACTTGCTGTACATGACG
LRTM2	4	951;7262;55305;69972	2	1.36321	0.896012	0.231979	0.834302	0.833967	TTGGTGCATTGACCTAGAGG;GCTGGCCAAGAGCCTAAAGG;GCCCTCCATGTACTGGCGAT;GACGCACCCCAACATCGACA
TBL1Y	4	317;8178;16069;44194	1	1.7912	0.895598	0.0933831	0.764962	0.764962	AAACAGCAGTATCAGAACTG;GCTGAAGCTCAACAGAAACT;TTACAGGTATGTTGAGTCGA;TTTATCCAGATGTATAGCCA
MAST3	4	3124;4006;60479;77129	2	1.8405	0.895451	0.0844258	0.74501	0.74501	TGTAGCAGAGAACATCGACT;CAACATAATAATCCATAACC;AAAACTGTAGGAACTAGTCC;TTCTGAGGATCTATACCCAG
OXSM	4	319;13042;59270;61068	1	1.7885	0.894249	0.0938945	0.76815	0.76815	GGAAGAACTCATTATGCCCA;GTGGCGAAAGTCTCCAAGCG;GAGAATGGGACAGTCCACCA;GGATCCTCCAATGGTCGGGA
SOD1	4	3269;3947;10120;18627	2	1.85269	0.893794	0.0823702	0.740389	0.740215	TTTGTGCATACAGCTCATGT;GCTGTATGCACAAAGTTTGT;GGATCAGGAGACCTGTTCAG;TACTTCATACTTACAGGCTG
PRPF38A	4	2716;4307;18288;37919	2	1.78114	0.893547	0.0952376	0.770113	0.769588	CAATGTATACAACGATACCC;CTGGTCTGTTAGTCCAACGA;GAACCAGCGTATATTGCACG;GAAGCGCACACGGTTAGAAG
SPIC	4	996;7168;21090;43584	2	1.37336	0.892959	0.226754	0.83413	0.832843	GGTGGGAAGTTCAACAGCTG;ATAGCGTGTACAATACATCC;CCTTGTTCTCCACCAAAGCA;TGCTGAATTGCATGTCCTTG
MYCBPAP	4	1170;6582;27789;54520	2	1.44023	0.892929	0.195842	0.820863	0.820508	GGCCAAACCAAAGTCTACCA;TAGGGGGCAAGATAATGTCA;TTAAACACATTACTAAGCTG;TCCTGGTGTACCTGCCCTAG
RBX1	4	3496;3843;20201;28008	2	1.87466	0.892729	0.078975	0.738393	0.737145	ACAGATAACTGGGTACCCAG;TGCCAGCACTAGGTGAACGG;ATACCAAGAGTAGGAGAGCG;ACACCTATGAAGACCAGCAG
PROKR1	4	322;70795;72266;72311	1	1.78448	0.892242	0.0946519	0.771334	0.769588	TGGCGATGAAGTTTCCAGCG;GTTTCTGTAAAAATCCACAA;GCTGTCACAACTGTCATCAG;CCTTGACGCTCTACCCATGG
MAPK8IP3	4	323;27908;51687;57703	1	1.78315	0.891577	0.0949082	0.771421	0.769588	TTTACGCAGAGTGATCTGAA;ACTGTAGACAGGTGATACAA;TGAACCCAACCCGGAGTGCG;TTTCCATGGGAACATCATCT
COX15	4	1828;5264;12488;47678	2	1.6183	0.891454	0.133446	0.796239	0.796239	CACGAACACCAGCTTGACGT;GAGGTATACATGGCCATGCG;AATGGGGCCTCACCAGACAA;GTTGTTGGGATACTCAGGAC
Non-Targeting Control-AACGTGCTGACGATGCGGGC	1	1277	1	1.78278	0.89139	0.0949474	0.770743	0.769588	AAGACTCAGGAACTTTCAAG;TTTGTGCTGGAAGAATACGT;ACAGATGAGGATACACAAGA;AGCGGCTTGCTGAAAACCGG
FDX1L	4	2381;4625;13005;59920	2	1.72306	0.891298	0.107236	0.785273	0.783895	TCTCAATGGCAAAATCCATG;CAGGAGCTGATACACAACGT;GTGGAATCGAAGATCCGAGT;ATTCACTTCAAAGGGTCCCG
SBK2	4	325;40054;46113;71474	1	1.78051	0.890253	0.0954205	0.7706	0.769588	TCTCTGAATCTGCACCCACT;AATAGACATCGCTACTGGAA;TAAGAACTTGCACATACAGT;AATACGACTAGTCATCACAT
Non-Targeting Control-GAACCCAACCTTTTACCGCA	1	1285	1	1.78007	0.890034	0.0954589	0.769921	0.769588	CAACGACGGGTTAGTCACCG;TTGGAATCTTACATGAAACC;AGACAATTCAGTAAGCACAG;GTCATGGCAGTAAACTCTGG
TMPRSS11B	4	327;31150;69454;73997	1	1.77788	0.888938	0.0959389	0.770824	0.769588	AGACGATGGGAAGATAACGC;GCGTGGGTCAATATGGACAT;TATAAAAAGACTTGACCGGG;ATAAACTGGGTCATCAGCGT
DNAJB3	4	1208;6581;11047;63685	2	1.44035	0.888558	0.195815	0.821298	0.820508	TCTCCCTTGACAGGGAACGA;CTGGATCACAACATCCGCTG;GGACTGTCTGTGGAACCACT;TAAGGCTCCTGGATGAACCT
CAMKK1	4	328;21060;60882;61313	1	1.77657	0.888284	0.0962029	0.770973	0.769588	TCTCACCAGCACCTGAACGG;GTTGTAGGAGCCGCTAACCA;TGGCCGTGGATAAAGACATG;TGTGAACATTCTCTGCACCA
FAM45A	4	329;25674;59710;70972	1	1.77526	0.887631	0.0964589	0.771057	0.769588	GCTGATTTGGAAGAACAGCG;TCTTCCAGGAACCCGGTTTG;TTCGGATCTACTACACCTCG;CCAGAATCGCAGCAGACCTG
NUPL1	4	2278;4798;14040;15673	2	1.69322	0.887161	0.11408	0.790257	0.783895	GATCTCCAGAAGTATTGCTG;GTATTCCAAAAGCTCTGGCA;GACAAAACACAATCCCCTGT;ACCCTTATACACAACTCCAT
ALPK2	4	2364;4715;22152;60563	2	1.70739	0.887015	0.110785	0.796409	0.783895	CTTGAGCTCGATGGGCAACA;GGAGCTGAGAGATCACTGCA;CATAGCCATTCAGCAGAAGG;CTACATCGTGATGAACTACG
OR6N1	4	330;24347;65869;73851	1	1.77396	0.88698	0.0967256	0.77025	0.77025	TGGCCTTCAAACTAGACCGA;CTAGCAGTCCCATTAAGTCA;ACTGACCGACTGCCTTCTCG;ATTCACCAGTTCAGTATCTG
MEFV	4	331;26973;48679;53738	1	1.77266	0.886332	0.0969641	0.771171	0.770339	AAAGACTTACTCCAATGAGG;CATGAGCATGCACAACGTCA;AGCCTCTTGCTGACGTCCTG;GGGTGAGGGACCGATCTGTG
BZW2	4	332;33062;59374;60964	1	1.77137	0.885685	0.0972234	0.771281	0.770646	CATGGGTGTAAGTACGAACA;TCTGAGGTTTAAGGTCTCGG;AAGCAGAGAGATCTCTCGGA;CAAATATTATTCCACAGCTG
VPS9D1	4	1020;7286;8076;48393	2	1.36064	0.885407	0.233377	0.834552	0.834308	CCAGATGGCACTTACACCCG;AGTGTGAGAGTCCCCAATGG;GTCTACATGCTCAAACACCA;GTCCACATATGCAACACCTG
FOXN4	4	1023;7276;33702;56407	2	1.36171	0.885356	0.232739	0.834171	0.834171	GCCTGCACGATGACCCGCCG;ACAGCAGGTACACGAACACC;ACCTGCGAGCCACCGTCGGG;GCACGGACGGCCGCTTGAGT
ABHD15	4	3668;3866;18953;55977	2	1.86975	0.88515	0.0797352	0.738903	0.738517	ATCTCTGGCCTTGTAAACGG;AGCTCCAAATAGTAACTCGG;TTAAAAACCTTACCCTATGT;TTTCCATAAAATCAAAGACA
NINJ1	4	333;31119;32220;50472	1	1.77008	0.885041	0.0974832	0.771395	0.770804	TCTCCCGCAAGGCTGTAATG;CCAGAGTGTCACCACACGGT;GCGGTTATAGGGGGAAGCTG;GCTGACTGATGAGGGCGAGT
HIST1H4K	4	334;16009;20042;69219	1	1.7688	0.884398	0.0977369	0.772429	0.770804	GGTCACAATATTCAAACACC;TGACTACTATACAGACTACG;ATTGCCCAAACATCCACCGG;TCGGGAAATCCGAATGCTCA
CDK4	4	3201;4127;14912;16824	2	1.81609	0.884238	0.0887632	0.757744	0.757744	CCATTAGCGCATCACAGTCG;AGTCGAAGTTCCATCGCTCA;TCAGAACCCATGCGGCAGCA;GTCACCGAGACACCACTGGA
TPD52L2	4	335;59064;66460;68246	1	1.76751	0.883757	0.0979836	0.772435	0.770804	CCGGTCGGGTGAGAGTGGCA;GATGATGGGCAGCGCCCGCG;CTCCACTAGTCCCCGCGCCG;ACGGAGTCAACCGTTTCGGG
Non-Targeting Control-CCCGTGGCGTGCGCACCTGT	1	1323	1	1.76741	0.883706	0.0980023	0.771614	0.770804	ATCATCCAATCGCAGATGGA;GCAGAAGAACTAAAGAGCTG;CTGGATCTCTACCAGCAATG;AGACTCCAATTCATATATCA
RNF225	4	966;7570;45196;59435	2	1.33095	0.883078	0.249186	0.839934	0.838583	TCTCACCCGGTGCTGACGCA;CAGGCATATGCACACTCATT;TACAAGTCACTGATAGACAG;GTGAAATTTACTATACCAGG
PDILT	4	1016;7382;44026;74932	2	1.35046	0.88256	0.238639	0.83717	0.83717	GTCGCAGGTAAAGTGTACTG;AAATGAACATGGTACCACAC;GAGGTGCGCTATAAAATCCG;AGCGTCATCAAAAAACACCC
AATF	4	337;31838;40747;72039	1	1.76496	0.882482	0.0984971	0.773572	0.773572	CTACTTGTGTCTTCCAACAA;CTATAGCTTCCAAAAAATCC;AGAAAATCCACATCTTCCAA;AAAGGTATGTCTTCCAACAA
TNFSF4	4	338;14823;73381;74474	1	1.76369	0.881847	0.0987576	0.774649	0.774649	CCTAGACTTGCACCTAGCTG;GGGCGCCCAAGTCGTCCCCG;GTCGTCCGGACCCAGTAGGT;CTGCCCAGCAGAAGATCCAT
IL1R1	4	2641;4562;68113;72854	2	1.73422	0.881523	0.104858	0.784313	0.783895	TCGCATTCTCTCTGACACGT;GAAGTGGAAGTTGAGAACGA;AGAAAATGAACACTTCCTTG;ATCGACCTCAGCAAGAAAGA
SDHC	4	3465;4020;11924;13749	2	1.83764	0.881496	0.084931	0.746324	0.745436	AAGGCCACCATTGCTACAGG;TAAGGGTAAAATCTACCCTG;TACGCGTGGGGTCCTTACAA;AGCTCTCACTCGGGAAACAG
ZNF35	4	339;55554;63435;74437	1	1.76243	0.881214	0.0989994	0.775578	0.775186	CTGCTGCAAACGCTCAACCC;TGGAATGGCTACGCGCCCGG;CTACGGCGGTTACCACGTGG;CAAATATCGAGTGGTGTACA
SLC38A4	4	3191;4186;23738;71317	2	1.80446	0.880756	0.0908623	0.7622	0.7622	CCCATTGTACTAGACGGCCC;GTAGTCGGTCGAGCAGAAAG;TCTTGCGCATCCATGCATAG;GCCAGCCTCCAATTTCGCTG
PCDHA8	4	1005;7496;55860;77032	2	1.33856	0.880108	0.245049	0.839499	0.838583	CTTTGTGGATAACAAGATGT;GGGCCCAATAAAGCTCCGAC;CTGCGGTCCTGCTCTTAACG;CGACTTCAACAGACGCCACA
RADIL	4	341;18388;48886;54542	1	1.75991	0.879953	0.0995171	0.777694	0.775667	GTGCAGGTTCAATCCCCCGT;AATTCGCTTCCGTTTATGGG;TGTCAGGGCATTGTTATCCG;GGACAACCGGCCAATTAGGT
IGFBP1	4	342;14955;16400;25410	1	1.75865	0.879326	0.0997827	0.77591	0.775667	CAGTGACTGAGTTATTGGCG;ACCCCAGGGCCCGCAAACAG;GAATGTTCCATTGATAAGCC;TGCCATTCAATGTTGCAGAG
MTBP	4	1526;6037;15635;23237	2	1.50865	0.879311	0.168795	0.81019	0.808072	ACCAAGTATAGGCACAGGGT;CATGCGCTCATGGAACACAA;TGACCAAGTGCACATCACCA;AACAGGACCCTAATCATCCA
FGF13	4	2764;4502;57631;72782	2	1.745	0.879242	0.102578	0.778377	0.778377	AACTCAACAAGCTACCCCAG;AATGTCACCCAGAATGACAT;CGTCGCCGGCATCGTGACCG;TGCCGCTCAGTGTCGCAGAG
ZNF814	4	2429;4791;33009;51616	2	1.69441	0.879138	0.113816	0.791919	0.783895	CATTCAAGCAAATATCCCAG;GTTATATAACCAGCAATGAG;TTCAATAGTGAACTGGACAG;GCTGTTCCAAAACATCACCC
EIF4G1	4	3074;4287;47988;49222	2	1.78495	0.878976	0.0944922	0.771032	0.769588	CACCAGCAACAACTTCAATC;CGAGAGACAATATACCCCAA;GTTCAATGTCGCAGAAGGGA;GTTCCAGAAGGTTAAAAGCG
CACNG1	4	1894;5420;23174;44708	2	1.59482	0.878869	0.140283	0.806403	0.7989	GAGCCCCTGTACGAGCGCGT;CAGTTCCAGATCGCGCACTG;TTGGCTTCATCCTCCTCGCG;CACCCCGACCTCCGCGCGAG
ZNF776	4	343;25516;39765;50816	1	1.7574	0.8787	0.100034	0.775945	0.775945	TGAAGTCGATGGCGCGCTCG;CCTCTTCTCCGACGACTACG;TCGAGCCCGCGGACTGCAAG;TGCTGCGTACGGCGGCAAGG
SCCPDH	4	1493;6120;21619;29884	2	1.49779	0.87867	0.172795	0.808394	0.808394	AACAGCAATCACAAGGCGGG;GGCGGCCATGGAGTCGATGT;CTTCTACGAACCGGGCCGGG;CACCACGGTCTGTGCGCACG
RAB11A	4	1383;6378;27922;53615	2	1.46508	0.878214	0.185521	0.816266	0.815941	CTTACCTTGAGAACGCGCAG;GCAGCCACTCGAGTTCTCAG;CAGACTCGATGTAGGCGGAG;CAGTACCAAGTGGCACACTG
ATP5J2	4	2564;4690;9121;34378	2	1.71171	0.877856	0.109795	0.793836	0.783895	CAACATTAAAGCCTGGACAC;AAAGCTCCACATATAAATGG;TGAAGGCAATTGTGTCATCG;ACAAAGCAGCTCATGAGCCA
HCFC1	4	3033;4336;8499;43405	2	1.77566	0.877584	0.096293	0.770712	0.769588	TGATGCTCTGTATCCCAACG;GTGGGTCTGGAACTTCACGA;GGCACTGTGAGCCGCTACCA;CACTCGTCGATGGTCCCGAA
DPPA3	4	345;41030;44590;66825	1	1.75491	0.877455	0.100532	0.778843	0.777778	TTGACTCCCGAACTTCACAA;AGGTCTTCCGGCGCCCATCG;GGCGGCCCAGATGCAACACG;GGCGCCTACACCACGGCGGT
IFNAR2	4	347;21863;59128;71935	1	1.75243	0.876216	0.101048	0.778047	0.778047	TCTCAGCCCACAAGCCCCAG;GCCACTTCCTAAGGGGTGCG;TGCACCTCACACCTCTCAGG;ATGCTCAACCTCTAACACAT
WNT1	4	348;53702;67670;68336	1	1.7512	0.8756	0.101286	0.778924	0.778063	GGTGCCCCAGGTCACCACCG;GGGTTGCATCGGGACTGCTG;GGCACCTGCCAAGAAGACCT;CTTCGAGGGCTTGGTCAAGG
GTSE1	4	2968;4426;28457;29482	2	1.75889	0.87475	0.0996371	0.775737	0.775667	GCGGCCGGTTACCTAAGGAG;CTTCCTCCCATCAACACAGT;GCGGAGACAAGGTTGGCTAA;ATATGTGTTAAATTCACTCG
SCNN1A	4	350;14865;23756;58342	1	1.74874	0.874372	0.101803	0.779088	0.778063	TCTCCCTACGACAAGCTCGA;GTACCATAGACTGGTCTCGG;CATAGCCGCCTGCTTTCGTG;GGGATCCTGGCCCTCTAGCG
CCDC6	4	351;24913;50905;59453	1	1.74752	0.873761	0.102058	0.780087	0.778063	TCGATGGCGAGTCAACCGAG;AGATCTTGCTATCTCTACAG;CTCAGCCTTCTCCTGAACGA;AGTGTTACGACGATTTGAAG
LYPD6	4	352;20782;29079;70592	1	1.7463	0.873152	0.102296	0.780009	0.778063	AAGCCACAAACAGATCAGGT;GCGTCCATCTGATTGGTGGG;AAAAAACAGATGCCACCTGT;ATCAACTTCGTATCATCGGG
TTC31	4	2859;4535;12624;31349	2	1.73905	0.87292	0.103841	0.781356	0.781356	AAAGGACCTAGAAAAACAAG;AACTTTGCCATCTATAAGGG;TATTCACGATACTGTTAACA;AACAGAACAGTCCACAACCA
SMARCC1	4	3555;4104;15097;56658	2	1.82067	0.872656	0.0878472	0.755053	0.755053	CTCTGAAGCACACTACACTG;CAAGTGTTCTGGTAGCACCA;GATGCTTTGCAAATGGCAGT;CTATTAAATATTGCACTCAG
RAG2	4	354;48395;52247;63629	1	1.74388	0.871939	0.102829	0.77934	0.778679	TGAAATGGTACTGTCCACTA;ATGTCGAAAGGGAACAACGG;CTGCCATTGACTGAGTTCAG;ACTCACCGATTCAAATGCTC
HGSNAT	4	355;28599;43172;58918	1	1.74267	0.871334	0.103061	0.779222	0.779222	AGAAACGATTAGAATCGGTC;ACCTGCAACTGCGAACACTG;TTGCCATCTGAGAATAGAGA;CATTCCTTCTGCATAAACAG
AP2B1	4	2082;5349;22964;57862	2	1.60541	0.869784	0.137211	0.801206	0.798519	CCCCAGTCTCCAGAACACAG;GGCTACTTACACCTTCAGCT;AACACGATCAGGTCAATTCG;CGTACTTACCACCTGTGGCG
SLC26A1	4	358;21024;54256;74215	1	1.73906	0.869532	0.103825	0.782169	0.781356	AGTACCTGAATGCTTACTCT;GGAGTGGTTTCTGTATGACA;GGCTGGTCAGTTTACCACTG;TTTGCAGCTATCTCTTCCAG
PTMS	4	359;22757;39660;47119	1	1.73787	0.868935	0.104089	0.782287	0.782287	TCTCTTCCCAGGGCGCCGGT;ACCACTCCACAAAAAAATGC;AATTAAGTGAATTTGTGTCT;ATACACCAATTCAATTTGGA
CACNA1E	4	2834;4627;68483;74927	2	1.7227	0.868596	0.10728	0.784682	0.783895	ACTTGGAGGAACAGACACCT;CAGGGAGTGATACACGTTGG;CGGTTGCTGACAGAGCCTCA;GAAGTAGAGCCCTTACACGA
IMPAD1	4	361;18218;44701;55542	1	1.73549	0.867746	0.104577	0.784079	0.783895	GAGGAAGCAGATAAAGCGGA;ACTCGCTTTAGAAAGCCACG;TGTCGACCATAGTCTCCCAG;GGAGAAAAGTGGTGACTTAT
TMEM30B	4	3838;4043;41913;62259	2	1.83296	0.86733	0.0857248	0.748068	0.748068	TTGCACCCTATCAAGCAGAG;TATTCGTAAGCATTATGGGG;TAAGACGTGGTCCTACCGAG;AATTTGCAGCTGTGACGCGG
UGT1A3	4	362;38596;44996;55749	1	1.73431	0.867154	0.104837	0.785093	0.783895	TCTCACATACCAGAGAAACT;CAGAGAACAGTAATTTACAG;GGAATCTCTAAATAATGACT;TTATTGCATATGCTTAAACG
PTPN3	4	363;9923;23636;41173	1	1.73313	0.866563	0.105103	0.785214	0.783895	GAATCACTTTGACACATGTG;AGGTTTCAGATCGGGTGGAG;AGAGACTGATGATATGACTC;CAAACTATCAGGATGAACAA
POTED	4	2399;5062;38421;71657	2	1.64986	0.865914	0.124948	0.790582	0.790582	AGCAAGAGGACCTGGCACGT;TGGGATTATCAAATGACAGG;AGAGAACTAAAAGAATGCTG;GAAGATAAACCACTTTCGTG
GCNT3	4	365;30658;61970;67205	1	1.73077	0.865387	0.105593	0.787002	0.783895	GTGAGAATTCATCCGACCCG;AAAATGAGCCTGACTCGCAG;CACAAATTGCTACAAGCCCG;AGAAAGGTCAAACCCACTCG
HDAC3	4	2176;5332;9134;24852	2	1.60797	0.864786	0.136458	0.800527	0.798519	TCCTGTCCTATAGACTCGGA;TCTTCCAGATAATAAGCAGG;CTGCTGCCATACGATGATGG;TGAAGCCAAGAAATTAGCTG
ATIC	4	1969;5605;11019;67069	2	1.5679	0.864706	0.148594	0.806929	0.7989	GAGCAGTTCATAAACAACGC;AAATCCACGCTCGCACATGG;TTCCCTCTCTGATCAAACAC;GGGGAACTGGATCTAGACAA
PLXNC1	4	2093;5440;46644;74238	2	1.59186	0.864566	0.141222	0.80371	0.7989	TTCGACGCTTGGAACTTGAG;TTAAGGAAAGGCTTATCCGA;TATGCCATTTGTAGCTGGGA;TTCTAGACCAGTCTGCAACT
ARID3A	4	2147;5374;43403;56310	2	1.60166	0.864458	0.138273	0.799973	0.7989	AGTATGGGTAAAATTCAACT;GGAAATCTCCCATCTAACTC;GTTGGATGTGACACATAAGG;AAATAGAGCGCCTCACCATG
TGFBR1	4	367;30086;42991;52636	1	1.72843	0.864217	0.106111	0.786197	0.783895	AGTCCCAATCCAGCAAGTAG;TGGAGACCTTCTGCTCTCCG;TCCAGAGTACCCCAGAAACA;AAACCTGTGTCAGCCGAGCG
SLC18A2	4	368;38412;59705;73097	1	1.72727	0.863635	0.10638	0.786335	0.783895	AGTCTTAATTCATGCTGCGT;ATTTATAAACAGACCAAAGG;AGAACAACGAGCTAATGACT;TTGACAAACAGTCATCACAA
KIRREL3	4	1202;7260;74702;76642	2	1.36342	0.863603	0.231916	0.835032	0.833967	CTAATATTGATCCAACACGG;CAGGGGCTCGTTCATAACCA;GATAACGTTTGATTGAGTGG;CAGGTTTAGAACGAAAACGT
RPS20	4	3594;4227;8140;8185	2	1.79648	0.863242	0.0923862	0.763767	0.762891	GAGAATGTTTCATTGCACCG;TGTCGGCTACACTTGAACAG;GTTGTACAGAGTGTTGCCTG;TAAAGTAGAAGGCATCACAT
POLE	4	2814;4737;14632;31876	2	1.70361	0.86314	0.111598	0.793179	0.783895	GTGCCGGTGAAATCCCACCA;CCTCGCCCTTGGTCAGAGTG;AGACTCTGCGGCTTCTCATG;AGGCGAGCATGCGTTCCCGA
EPOR	4	369;8761;20195;39477	1	1.72611	0.863054	0.106619	0.787173	0.783895	CCATGATTAGAGTCCCAGCT;TCTGATGTCAAGCGAAAGGT;GAACATTTCTACCTGACCAG;CAAAGAAGTATCGAACGATG
DEFB133	4	1498;6493;68007;77240	2	1.45096	0.862603	0.191316	0.818271	0.818271	GCGGGGGTAACCGTAGCCGT;TCCTGATAAGAAAAGGCTGG;CATAACTATCCATTTCAGGT;ATCAACAATATGGTTCGAGT
C5orf28	4	370;13343;53057;64096	1	1.72495	0.862475	0.106893	0.784588	0.783895	CAGTAGATGACCACGATCGT;AGCACCAGCAGTTGTACGGG;TAGTATCTCACCTTGGAACG;GTGTCCTGAAATCTTAGGCA
NBEAL1	4	371;26939;43034;65925	1	1.72379	0.861897	0.107135	0.785451	0.783895	CCTCAACCTTACCTGAGGGT;TTACCTGACTGCTTAACCGA;TGCAAAGACCCATACATCAC;AGCATCGCGGGGTTCCTGCG
KLK3	4	1720;6080;39831;68352	2	1.503	0.861217	0.170829	0.808831	0.808072	TTGTACTTGGTATCACTAGG;GCACCTGGAGAAGATCACAT;CCGGACAAGTCACATTCATG;ATGAGGACTGTGCAACCAAG
UXS1	4	2419;5135;8414;12940	2	1.6383	0.860975	0.128035	0.791774	0.791774	GCACAGTCTCAGAGATAGCG;TTGCACTCAGCACCCATCAC;ATGGTCAAGGAACCTACCAA;CAGTAGACAAGATTTGACTC
JUNB	4	3528;4304;36822;65431	2	1.78171	0.860616	0.095187	0.770695	0.769588	CTTCCATGTTCATAAGGACC;GGAAAACCAACAGAAGGCGT;AGTGAACCTGACCAAACTAG;CAGGTGCAGCTTCACAAGTG
SF3A2	4	2043;5608;26130;27087	2	1.56747	0.859648	0.148785	0.807268	0.7989	GTCATGCTCGCAGTAGCGGC;CACCTCTCCGAAATGACTGG;CTACTCCCGGGCTTTCGGAG;GAAACATAACGGCGGTAGAG
ARID5A	4	375;33163;35564;40996	1	1.7192	0.859602	0.108163	0.788387	0.783895	AGACCAGTATAAAGTTGGAG;ACATCAGGATCAATTACATG;ATAGTGGAGGAGAGTACCTG;GAAATGCATTGTTCAGACGA
PPRC1	4	1434;6722;12065;52037	2	1.42366	0.859459	0.203099	0.824337	0.824337	GAGGATTACTTACTGAGACA;TTGGAAGACCGTAGCCAGGA;GAGCGGTGTACTTACTGACA;TTAATGTCTGGAAAATCACA
UBE2V1	4	2004;5668;27864;34696	2	1.55895	0.859375	0.151434	0.803599	0.7989	CACACCAGAATATAAATACT;CAAAAGACAAATAATTGTAG;TGACATTGGTGATACTGTAG;AAGGAAATCTTCTACACAAG
MASP1	4	376;24672;25148;57184	1	1.71806	0.859032	0.108427	0.789391	0.783895	CCACATCTATAGCAACATCC;AAGAGGTAAGCTGTCTGTCG;GGGCCGAGGCAAGATAAGCA;ATTACCTATAGTCCGAAACA
NOP58	4	3328;4449;13147;39855	2	1.75466	0.858872	0.100569	0.778172	0.777778	CCAAGGAGCCGCTTCGGCCA;TGCCGGCTACTGCCCCACCA;CCACGGCGTAGGAGACCACG;CACACCACCTGAGGCAGGGC
BUD31	4	3088;4608;13962;67303	2	1.72605	0.858767	0.10664	0.786407	0.783895	GCATTGATGGGGCGGCACCG;CGGTAGTTGCACACCACCTG;CCACGGGGTTCACGCCGCGC;ACAGCTGAGAGCCACGGCGT
TMEM9B	4	1224;7333;33908;63656	2	1.35563	0.858507	0.235907	0.837405	0.83717	GGGCGGCACCGTGGCCGAAG;CCGCCCCATCAATGCCACCC;ACATTGACAGCTGAGAGCCA;GCAGGACCCCCTGCAGCACG
SPRR3	4	377;12397;71607;75717	1	1.71693	0.858464	0.108675	0.79028	0.783895	TCCAGACCCGCGTGCTGCAG;GGGCATCCAAGGAGCCGCTT;GCCCTCCTTCTCCACAGCCA;GCCACGGCGTAGGAGACCAC
URM1	4	1405;6825;14773;47470	2	1.41172	0.85827	0.208518	0.828141	0.827028	GCTACCTAAAGGGACTAGGA;CCCCAAAGGATGGAGTCACA;GGACAAAGTGCTCGAGACCC;CTCCATGACTATGACCAGAG
C20orf78	4	3316;4471;30372;48939	2	1.75063	0.857983	0.101365	0.778578	0.778063	GTGTGTAACTGTGAGGCAGA;GTCCATGATGGTGTAGACGG;ATGTTCAGAGAAGTTGTATG;CACGACAGTCTCAATGCTGT
NPIPA1	4	3740;4240;32816;34372	2	1.79397	0.8575	0.0927437	0.763707	0.762891	AGGGCGACGGTGTTCCCGAG;CCAAAGAGGCCTCTAAATCG;AGTCATCATTGATTTGACAG;GAAAGCGGTCCGACGCCGAG
ATP6V0D1	4	2045;5651;29217;31143	2	1.56135	0.85748	0.150661	0.80357	0.7989	TGGCGCGGTTTGGGAACCCG;CATTCTAGCTAACCGCGTCG;GACTTGCATCACGGAGATGT;GAGCCCTCGCGGCACAATCG
SMARCA2	4	379;12211;40554;52092	1	1.71466	0.857332	0.109179	0.792114	0.783895	GCCATCTGAGCCATGAGCCC;CTCACACCTGGCTGGCCGGG;CCTGACCGGAGCCTTCAGCG;AGATGGCGACCACGGCCGCA
CCDC74A	4	2116;5559;16186;49661	2	1.5745	0.85733	0.146544	0.804839	0.7989	TGACTTAAACTGTTCTCCAC;CTAGGATTGATACTGCCAAA;TGGAACTGCCCATGCCTTGG;TGACCCCAACGATCCATACG
RNF20	4	2870;4801;11165;52587	2	1.69272	0.856983	0.114144	0.78983	0.783895	GGATGAAAATAACTATGACA;GGTGTTCCACTTACTTCTTG;GAATGCCCTCGGTAACACAG;AACCATCCTACCGACAAACA
ALG13	4	3844;4198;9449;25479	2	1.80212	0.856859	0.091336	0.764133	0.762842	ACAGAAGTAGTGATATACCA;GCTGATTGGTCGAGACACTG;GTCGCCTGCATATGTTACAC;GACCACCTGACTGAGGCTAG
TMEM127	4	381;8710;9830;71896	1	1.71241	0.856206	0.109692	0.794	0.783895	GTCTTACATCCACAGCACAT;AAGGCAGACTCGTCGAAGAG;AAGGGACGACTATAAGAAAG;TGAGCTGGTAGATAAGTCGG
NUP133	4	1197;7487;34582;40283	2	1.33949	0.856201	0.244543	0.840517	0.838583	CAGTCACTCACCGTACAACG;TACTTACTGGAACCTCTCGG;CAAGATGCTAGACCTGCTAG;ATGTATGTCGTAACCTATGT
HIST1H2AC	4	1797;6073;16888;23040	2	1.50392	0.855624	0.170535	0.809879	0.808072	CCCGGAAGCACTCCGCTCGG;GATGGGTTCAACGTAGATGG;CCGAAAGGGCGGCACCAATG;AACAGCTCCAAGTCGAACGG
UNC5B	4	383;26055;53204;63913	1	1.71017	0.855086	0.110204	0.794053	0.783895	GTAGGATTCCCATCAAACAG;TGGGCAGCTATATGGCACGT;GGATCTGATCACACCCACAG;TAATGGTGTGGGTTCGACGT
INTS5	4	1217;7455;11403;28889	2	1.34281	0.855024	0.242664	0.840959	0.838583	ATGAGAAATATAATACCATG;CTTTAATCCAGACTACGTAG;CTGTCTTCTACACTACCGTG;CATACCTCGAGTCTTAAATG
LSM3	4	2971;4759;42057;59861	2	1.69985	0.854942	0.112544	0.79273	0.783895	GTGCCCACGGACGTAGACCA;GAGACCACTACCTTCATGGA;AGTTGTACCTGTCGTCGCAC;CCGGGACGAGTACAGCTATG
SLC4A7	4	3369;4499;22103;26779	2	1.74555	0.854302	0.102395	0.778871	0.778063	CTTACTGCAATGCTCGCTGG;TGGTATTGGAATAACTCACA;TTTCTGGAGTACTGTAGTGG;ACACCACCTGAAGTGACTCG
PPP2R4	4	386;12376;32964;39605	1	1.70683	0.853417	0.110965	0.796794	0.783895	GGGCCCATAATCGAGCCCAG;AGAGCTGTTTGACAAAGTGG;AGGTAAAGCTGGCTTTCGAG;GCATACATAGAAGATCACAG
WIBG	4	1234;7448;40547;61924	2	1.34354	0.853356	0.242338	0.840755	0.838583	AGGTGGACAAACGACGCACG;GAGGGATAGAGGCTCCACTG;TCTTATCAAGCTCTAAGCTG;TCAGACATGAAATAGGCACG
WSCD2	4	2113;5656;30875;74667	2	1.56065	0.8529	0.150902	0.80213	0.7989	CAACGATCACATCGACACCT;CCAGGCTCCATGAAAATCGT;CCCACCCAGGACTATGCTGT;GACCAGCACCTTGATTAGGG
MUTYH	4	387;16174;26459;45886	1	1.70573	0.852864	0.111208	0.794903	0.783895	CCGGGATGAACTGCTCCAGT;TTTCCGAGGCTCATCACCAA;CATAACGCTCTCCAGAACCA;CTTGGACTCGAGGTCGCTGG
TEC	4	388;23837;32163;64888	1	1.70462	0.852312	0.111476	0.794108	0.783895	ATTTCTCCTTGGCCATACAA;AGTGCAGTACAAAATGTTGA;TAGAATTTAAAAATGTCACT;AAATAGTTAAAGAAGGCAGG
SPAG11A	4	1211;7555;20594;27346	2	1.33248	0.852262	0.248271	0.840004	0.838583	TCGCGGCCAAAGAACTGAGT;GAGTGCGCGAGTCGATGCAG;AGGGCAACATGGAAGTTGCG;AACCACACCAGCCATCGACT
OPCML	4	4119;4141;9423;50434	2	1.81331	0.852214	0.0892757	0.757999	0.757999	TCTCTAGTTTCTGTCGCTCG;AGACGCCAGAGGAGCTACTG;TCGATGGCACAAGCCATGAA;CAAACTTGCGCACATAGCGC
ZNF518A	4	389;44499;63793;71788	1	1.70352	0.851761	0.111721	0.793157	0.783895	CCAGATCGAAATGAAAGTGA;GCTCAAGAAGAAGCGATACC;GTGTCTGAACAAGATGCACC;CCTTGTCCTGCTCCGTGACG
TMEM225	4	1274;7369;62066;62452	2	1.35183	0.851727	0.237895	0.837833	0.83717	CGCTTTCAAGAGGAGTCGCG;ACGGACAGAGAAGCGCATCG;CAGATTGTGAAGTTTGCCCG;TGGACTCTTTCTAACATGCT
BANP	4	1829;6111;20155;24386	2	1.49896	0.8516	0.172323	0.808591	0.808072	AACCCAATTTATGAGCACGT;ACATACCACTAAGCGGCCAA;TACTGTGCCAACTTTATGTG;AATTACCTGTACTTGCGAGG
SMC2	4	3820;4302;14607;17916	2	1.78209	0.85095	0.0950225	0.770356	0.769588	GTACAAAAGGGAAACACATG;GAAAGACCGGAACACCTGGG;CTTCTAGACTCTCTAGACCC;TAGAAGCAATAAAAAGACCA
CLEC2L	4	391;50029;51732;56841	1	1.70133	0.850665	0.11224	0.794151	0.783895	CTGCATTCTCGATGCCACCG;CCCGGGCCGGATCAAAGCGT;TGTGCACAGGGTCACGCACA;TAGGACCCGCTACATCAGCA
CLDN22	4	2883;4911;45520;60423	2	1.67436	0.850285	0.118679	0.78739	0.783895	CATTTGGAGGAGCAACAATG;AGGATAAGTTCCTAAGCGAG;GAGTCCAGGTGACAAGACAC;GCTGGGGCTCGCCGTCAACG
LYAR	4	392;13450;30805;40846	1	1.70024	0.850118	0.112483	0.793189	0.783895	TCAAGACAAGAAGTACAGAG;AATGGGACAACTTACCAACA;CCACAATGCCAAATGCCCGG;ATTGATGACAATTTGCACAA
KRT7	4	2325;5461;27540;75739	2	1.58876	0.849656	0.142199	0.804897	0.7989	CGATAATGGTCACCAAACTG;GGCTGCAATAGCCGTACCAA;AGAGGCAACAGCACTGACTG;AAGCGGACCACAAAAATGGC
ASGR2	4	393;18567;42494;44888	1	1.69915	0.849574	0.112753	0.793309	0.783895	GGGGTACGGATACAGAGGAG;CCACGTACGTAGAGTCGTCG;TGCGGTCGTAGGTCCACGAA;CAGTGCTGACGGCATGTACG
C19orf84	4	2132;5705;23435;31646	2	1.55375	0.849414	0.153169	0.803975	0.7989	CAGGATTCCAGCGTAACTTG;GATCAAAATGAGGTCAACCA;TCATCAGGGAGCCTTCGAAG;GGGAAATACTGAACGCAAAG
TAZ	4	3724;4377;18240;19794	2	1.76797	0.849361	0.0978259	0.772161	0.770804	GGATGTTCACACCCTCGTAG;GTTGGACCGGACTATCAAGT;TGTGGTCATAGGTCCAGGAG;GCCGATGAGAGGCACATCGA
TAF2	4	3150;4727;26336;45019	2	1.70533	0.849343	0.111271	0.794452	0.783895	TACAGCAAGGACGACTTTGG;AACGTGCTCGTCTACGAGGG;TCAGACGTACAATGCCGAAG;GCAATTCATGACAATGAGCG
SLC10A1	4	1530;6759;56696;58766	2	1.41935	0.849189	0.205067	0.828042	0.826551	TCTCGGTCATGGATAGCTGG;TTGTGCTCAATGTCTCCTTG;GCGAGACTACGAAGGCCTGT;AAAACTACGACCCCAACCTG
ACSBG1	4	394;14574;16580;65109	1	1.69806	0.84903	0.112995	0.79235	0.783895	CACAGACAAATATTCGGTCC;GGAACCGGACAGAGACCCGG;CTGTACCAAGGCTCAAACCG;TGAGGAGATCCCCGAAAACG
SUMO3	4	395;47522;72658;72739	1	1.69698	0.848488	0.113241	0.792309	0.783895	AGAGCGTGAGAGGCTACGAC;CCTTCTCTAGGCCGCACACG;ATTCGACGACATCCCCAACT;GGCGGAGATCAGGCGCACGA
ORC6	4	2693;5109;33230;33301	2	1.6424	0.848396	0.126848	0.792236	0.790583	ACTTAAAGTAGTGCTGCAGG;AGCGGTAACGGTCACTTACG;CTCGCCAAACTTGTTGCGGT;GGGACGCGGACTTGCAAGTG
HYAL2	4	3023;4841;9902;22532	2	1.68599	0.848114	0.115839	0.788534	0.783895	TGCCCTATGATGTAGAAGTG;GCTGCGAGACCGCTATCCCG;GGCATTATTATCCCACATCG;CAAACAGTAAGAGCCCCTGT
SLC5A9	4	396;21904;58690;60081	1	1.6959	0.847948	0.113513	0.793325	0.783895	CAAACACGTCCATGTCGCAC;GGTGGTCCACACGTGCCACG;GCTGGGCACCAACGGCACGT;TAGCCACGTACGCATCGCCG
APLF	4	397;9605;41661;46521	1	1.69482	0.847408	0.113755	0.792379	0.783895	TTTGATGTAGACATCGTCGT;GCGAGCCTGAGGGCGCGACG;CAGAGTTAACCCCATGCACG;AGAAATGTACACGACTCATG
RAB5B	4	3886;4328;25401;42110	2	1.77717	0.847218	0.0960185	0.770478	0.769588	TCTCATGCATGTCGGAGGTG;CAGCTTACCTTGGTACAAGG;ACAGAAGGTATAGCCACCAT;ACTCTGTAGCCACTATCTGG
C17orf53	4	2745;5089;18207;18742	2	1.64557	0.846985	0.126035	0.793464	0.790583	GAGGCCAGGTAATTACCGCA;GACGCCAGATACGCACAGTA;ACAGTGTGTAACCACTCTCG;AGGGCCATGAATCCACTGTG
TTC33	4	398;9930;56677;62193	1	1.69374	0.846871	0.114001	0.791456	0.783895	CTTCAAGGAGCGAATCTGCA;GGAGCGTGGAGTCGTCACTT;TTCAAGGCAGCACTTACAGG;GTTCTCACCAAAGATGCGGA
GLMP	4	1289;7467;21134;46174	2	1.34157	0.846698	0.243375	0.841565	0.838583	CCACAAAGTCGTTGAAAGTG;TCCCTTCAAAGAAAGGATCG;CGAGAAGCCACACTTACTTG;ACCTCGTCCCAATGGACTAC
TTC34	4	1549;6782;27927;75090	2	1.41668	0.846622	0.206289	0.827132	0.826551	GCTGAATGGAGTGCTAACCC;CACAAGCGGACCATCCGGAA;CAGACACGGAAAGGTCGCTG;TAAGCTCGGAGTTTGGACGG
LANCL3	4	1590;6694;24891;34891	2	1.42695	0.846496	0.201617	0.822573	0.822154	ACATCAAAGTACCCTACAGG;GAGAAGACAAAGTCGTACTG;GAGATTCAGGCAGCTCAACG;GGACAGCTCAAATAGGGCGT
SEPT2	4	399;36226;55217;71053	1	1.69267	0.846334	0.11427	0.789833	0.783895	GGGCATTGTGAGTACAATGG;CTACACGCTACCCACCAAGG;GGTCCACCTTGACTCGACCC;TAGGCAAGAACCTCTCACTC
PZP	4	2254;5617;23374;61677	2	1.56618	0.846209	0.149124	0.806319	0.7989	CGTCAGACAACCGATCCCGT;TGAGAACATTGACGACGCTA;AGTGGTGGTTGTGAAAGACA;CAGATCCGAGTAGACCAGGC
CHD4	4	2046;5899;8315;33102	2	1.52705	0.845981	0.162242	0.807737	0.807553	TTGGCTGTTTCACGAACAGA;GCTCTTCACAAGCGTCCCAG;GAGAGGACGAAAGACTAAGT;TTTACTGCACCTAAAGACAA
RPS19	4	2351;5510;11717;27790	2	1.5816	0.845807	0.144302	0.802344	0.7989	AAGGCTGACCACATCCGGAA;CTCACCAGATTCCCGAAGGT;ACAAGCAGTTGGAGTCCAGA;CTGTCAGTGAAAACCACTCG
NFKBIE	4	400;26915;34581;42391	1	1.6916	0.845799	0.114522	0.789834	0.783895	GCAGCTAAACCAGCTGACCG;CCAGCTTGATGTGTCCTGTG;GCAGCCGATTCTTGTCACTG;AGACTCGGTGATCCGCTGAT
CDON	4	2795;5072;22637;59034	2	1.64827	0.845564	0.125286	0.791922	0.790583	GATCAATGACATGAAGGCAA;GGGAATCGGACTTCAGCTGG;CCTCTCGGATGGGATCCATG;GGAGTCTGACATCTACACCG
TBC1D3L	4	1313;7427;9905;62184	2	1.34574	0.845554	0.241137	0.839371	0.838583	GGACACGCACCAGATACCGC;GCATGGAGATGACCCGCAGG;ATCATCGAGGACCGGCACGG;CCACGGTCATGATGTACGGG
PPIL1	4	401;10150;22644;43052	1	1.69053	0.845265	0.11477	0.789814	0.783895	TCTCATCAAAGTAGCCAGAA;AGAGGTGGAACGTGTTGTGG;TACGAGCTGCCAGTGAACGA;GAGCCGTGCATAGACTGCTG
CYTL1	4	402;16635;29977;43692	1	1.68947	0.844733	0.115031	0.789879	0.783895	ACGAACACTACGAGTACCGG;TGATGTCTGAAGAGGAGTGG;ACTTGTTTGGAAAGTTCTCT;CCACAAGCAGATCTACTACT
C20orf27	4	403;25439;27080;37760	1	1.6884	0.844202	0.11528	0.790724	0.783895	GGGAGGCTTGTATCACGTTG;GCCTCTACACCTGATAACCG;ACCTACGTGTACTCACCAAG;GACATGTAGGAGAACGTGTG
TOX3	4	404;20715;23028;39518	1	1.68734	0.843672	0.115531	0.788998	0.783895	TCTCTTACCTAGTGACGCAT;TAAGGATCTTAGATCCCAGG;CTGCCCGAATACGTACCGAG;CATCAAAATCAGTTCCCGTG
COA3	4	1489;7012;11458;21088	2	1.39055	0.843286	0.218441	0.830789	0.830415	GCTAATCAAGACAGTCACGC;TCGGTGTTTACACGGCCATG;TGGGGTCATCGATCTCGCCG;AAGAGTTCAGCCATGTACCA
LHX9	4	405;59339;66804;76632	1	1.68629	0.843144	0.115796	0.789093	0.783895	GGTCACCACCCAGTCATTGG;CCCCGTGGCCATGACGCAGT;GTCAGCAGCAGTAAAATGGC;GACCGAGGCAGCAATCATCA
PRIM1	4	2965;4983;14132;20647	2	1.66258	0.842776	0.121685	0.78576	0.78576	TAGGTGAGCACAAAATGCCG;TGAGTACGATTCCATACTTG;GGTACCTGCTATTAGTAACG;ATTTCACGCAGTCAAGACCA
VPS41	4	3009;4954;11827;28800	2	1.6673	0.842474	0.120443	0.785003	0.783895	GGTGCTATAGATGTCACACT;GTGGTGAGTAGAAGTCCCGT;GCTACATCCTAGGCCTTCTG;GCCCACCACAGAGATAATGC
CYP26A1	4	3323;4730;43501;60785	2	1.70481	0.842444	0.111334	0.793997	0.783895	CTCGACAGTGTGGTACACAA;GAAATGTACTCGCTTAGGAG;ACTGTACGTGGTACAGCACT;CAGAACACACGCCAGGACCA
OR5AU1	4	407;11107;28062;69518	1	1.68418	0.842091	0.116296	0.787378	0.783895	TTGTGGGCAACCCAAGAGAC;AGGCGACTGCTGATCCTGGG;GCAAACCTGTGTCATCCAAG;TTACAAACTACCTGCCACAC
POTEG	4	3757;4478;8041;29560	2	1.74936	0.842074	0.101621	0.778644	0.778063	GCCCATGGGAGGCTACCATG;AGATTAAGAGTCTTCCACTG;GGAGGTCTGCGTGGATCGAG;TCAGATGGGTATTCAAGAGG
SFMBT1	4	1572;6859;16030;27205	2	1.40782	0.841667	0.210278	0.827805	0.827028	GGGCAACGCGCAGCACACGA;GGCCCGCGCCCTCATCGTGG;CATCACGTCGCAGAACATCT;CGACCAGGACACCGGCACGA
BAG2	4	408;19616;37191;43759	1	1.68313	0.841567	0.11657	0.787535	0.783895	ACACCGGCACTATCACCATA;CAAGGCCAAGACCATGATCG;TGTCACCTCGCAGACCATCT;CAAGTGTACCAACTGCCTGG
STRAP	4	2067;5976;9370;26991	2	1.51672	0.841181	0.165964	0.810217	0.808072	AAGGAGGGCGATGACACAGA;GATTGTCTTTGTCATCTCAG;GCCGGTGCTCTGCACCACGC;AAAGCGGTCACCTTCCACAT
KIAA0195	4	2618;5323;35425;49465	2	1.60933	0.841027	0.136131	0.799358	0.798519	AGGGGGGATGAGAATCCTGC;GGGTGTCCAACGCGTGCAGA;GTAAGTGACGATGTCCTCAG;GCGCGACTTCGAAGCTCAGG
MAGT1	4	2091;5951;7874;37947	2	1.52006	0.840761	0.164736	0.809254	0.808072	TAAGCCCCAAAGTTCCACCA;CTCTCACCTGTCATGTTCCG;GCCCTACTCACACTTAATCA;CCAGACCTCTGATTGAGCCA
TSGA10IP	4	410;9149;13689;62356	1	1.68104	0.840522	0.117078	0.787584	0.783895	GAGCAGGCTCCGATGGCCGG;TCATGCGACAAGGATTCCTG;TCGGGGTTGGGATTCCACAG;GGTCAGCCTATGGTTTGCAG
EIF4A1	4	1821;6399;9273;66362	2	1.46248	0.840027	0.186554	0.816806	0.816646	GTGCGAAGCGCCCTGCCCGG;GGCGAACAGAAGGACCGCGA;CGATCCGGGTCGGGCTACGA;GCAGTACTGCCACACCCACG
GRB7	4	411;50084;50142;76755	1	1.68	0.840001	0.11733	0.78759	0.783895	GCTTCAAACCTTCTGAAGCA;TGGACTTGTAATTTGCATCC;AGCCAAAAGTCATTGACACC;ATCTTCACAGTCTGTCTCCG
KCNB2	4	2988;5023;32181;72552	2	1.65611	0.839637	0.123283	0.789586	0.78756	GAACGAGCCTCGGTATCTTG;TTCTGGGAGACAACATTACT;GATGTTAAGGAGTTCCCTGG;TTTGGAAACGGCAAATACCC
NHP2	4	3751;4522;12747;62819	2	1.74139	0.839614	0.103345	0.780427	0.779646	TCTCTGTGCCAAAGACGACG;TCGAAGGACAGCCACGACGT;AATCACAGCCCAAAGGACTG;CCCTGCGGCTCCCAGGCTCG
POP5	4	1980;6143;15299;20750	2	1.49482	0.839603	0.173972	0.80908	0.808731	GATAAAATTCCCAGTCTTTG;CCAACGGCTTCATTACCACA;CGTGTTGACAATTGCCAATG;ATCATCTTGGAATGAAAGCA
TMED3	4	412;11262;25632;65062	1	1.67896	0.839482	0.117599	0.786037	0.783895	TGTAACACAAAAATAGCCTG;TCACAATGAAGCAAGCACTG;AGCCACAGACCAGAGTCTCA;GAGCAGAACTGTGTTGAGAT
HIST1H2BD	4	413;50872;54253;59469	1	1.67793	0.838964	0.117849	0.786869	0.783895	GGAAGTCCACCACCCACTTG;TGGAAACGCGAGTTCTAACG;ACAAATGATGTCCCACTGAA;ATTAGTAAGACTGAACACAT
SLC4A8	4	3093;4957;48701;59601	2	1.66681	0.838815	0.120506	0.784598	0.783895	GAGGAAATTTCAATATACGA;TTAGGATTATCGACCAGTGG;GAATTAAAAGGGTATACCAA;CTGCCGTCAAACCAGAAGAC
LILRA4	4	414;42928;48380;51262	1	1.67689	0.838447	0.118098	0.787698	0.783895	CGTGTTCAATGTCACCACTG;GACAGACGTCAATAAGATCG;CGAGATCGAGCTCTTTGTGA;ACACCGGGAATCCAACACAG
PIGY	4	3443;4724;18116;32577	2	1.70584	0.838356	0.111088	0.794947	0.783895	AAAGCATATTCATATCACAC;GCAACGAACGATGATCCTTG;ACTCGCCACTGGAAGCAACA;ACACCATCAGCAAGTTCCGG
CABIN1	4	3398;4768;20525;24367	2	1.69831	0.837487	0.112851	0.792225	0.783895	AGAGTCCAATAAGCCTGCTG;CAAATGCAATGAACAAACCA;TCTGTTCAGAGAAGTATGCA;AAGCCAAGGCCAACGCAGTG
POTEB2	4	3237;4880;45688;50985	2	1.67949	0.837295	0.117411	0.787295	0.783895	GGAGCTCCTCGATTTCACCT;CCGCAAGATCTCGGGCACCA;CGTACTTCTCGTTGGCCGCG;CCCTCCAGGGTATCTTCACG
TRIB1	4	1825;6470;19276;27690	2	1.45376	0.836827	0.190121	0.817613	0.816646	CAGCACAAGATAGACGTCAT;AGTTGGGTAGCGTGACCTTG;GTTACCGTAGTCCTTAGGGA;CCTTCAGCAGCACACGCACG
PLA2G16	4	418;26503;28515;56323	1	1.67279	0.836393	0.119105	0.787722	0.783895	AGTCAGACATCAAGACACAC;GAAGAACACCAGCATCCGAG;ACTGCGATACCCGTCCCGAA;TAGGCCATGTGCCGGACATG
ADSL	4	2600;5436;11529;19669	2	1.59245	0.836293	0.141003	0.803919	0.7989	AACGAGCTGCTTCACGGTAA;GCTATCGTGGAAGTCACAAG;ATGAGCGAGATTATCGGGAC;CCTCACTCTAGATGAAATCG
ELP3	4	3605;4666;17980;33222	2	1.71588	0.835998	0.108813	0.790371	0.783895	GCCATAGGAAGTACAAGTCT;CCAAACTATGAGATTTCAGA;TGGAGGTAAACTTGTTAGCA;TAACCCCTGTTACTTACCAG
RASEF	4	419;36144;50681;70175	1	1.67177	0.835883	0.119355	0.786067	0.783895	GTACCCTTTACATCGCTGAG;GAGGATTCAGATGACTACGA;TCACACGCTGATTTATCACT;TAGTTTACATGCATTATCCA
FAM132A	4	1647;6846;22102;24714	2	1.40931	0.835846	0.209563	0.828102	0.827028	GTATCCTCTTCAGCACACAA;CTAGTGAAATTCGACAGGAC;GGCAAATACCCTATTATGGG;TGAGTACAAACAATAAACTC
APBB2	4	420;17241;24404;24628	1	1.67075	0.835374	0.119606	0.786068	0.783895	AAGGTGTGAGGTGAACCGAA;ACCAAAATGATACACCAGAG;TAGACTTGCCCACATCAGTG;ACATCCAGCTCCACATAAGT
EIF3A	4	1908;6361;16933;18640	2	1.46719	0.835341	0.184609	0.816257	0.815941	TGTGACTACTGGGAGTCTCG;GTTTGGCCGTAGCGATCCGG;AGCAAGAGTCCGTCCAACAA;GCCGGCACATCACAAACCAG
RPL38	4	3535;4722;21204;29448	2	1.70618	0.835193	0.111047	0.795562	0.783895	AGTTATTTACCTGACCCAGT;CAGCTGCGCTGTCCTAAATG;GGCCAACAACATACTTGTCG;GTTTCTGTAAAGGATCTAAG
CHD8	4	4079;4432;8692;16212	2	1.75778	0.834879	0.099875	0.775667	0.775667	GCAGCGACGTGATCAAACTC;TATCATGGTCACAAAAACGA;TTCCAGGTGTACACCCCCGT;AAATTACAATGAAGGACCCA
GPR55	4	421;20020;23980;61951	1	1.66973	0.834866	0.119875	0.785374	0.783895	TAGATGTTTCCATTAAACCA;TGACATTAGACCTTCACCTG;GCAACAGACAAACAGGCCGT;AACTACCTATGACAGTGCCG
C9orf50	4	3604;4691;41430;51807	2	1.71154	0.834584	0.109818	0.793085	0.783895	TCTCCTCAGAAGGATCCTGA;CAAGATAGAAACTCAGCTCG;AGATGGTGAACGGCTCTTTG;TGGCCTTATCCAATTCCCCG
PDDC1	4	4266;4352;39548;50360	2	1.77265	0.834455	0.096982	0.770339	0.770339	GAGCTGCAGACTAATTACAT;CTTCACCTGTATATGGACCA;TCCATGTATAAGGTTACCAC;ATCACCAGGATGGACTGCGA
BTN3A1	4	422;66339;73940;77220	1	1.66872	0.834359	0.120131	0.786231	0.783895	CTCTCACCCGGACCCCCCGG;ATAGCTGCATAACTGTCTGT;GGCCACTCCGTTCCCCAGCG;GCCTTCGCCATCCTGGACGG
Non-Targeting Control-CCTTGGCGAGACGGAGGTAC	1	1662	1	1.66834	0.83417	0.120173	0.785688	0.783895	GTACTCCAGACACTATCCGT;GGTCAGCCTTAATTGCAGTG;TAATAAGTTCCAGATCACAT;AAGTTGGCACACCACCTACA
CMPK1	4	3318;4882;19945;29462	2	1.67915	0.834081	0.117456	0.786755	0.783895	TGCGGTATAAATATAGGACA;ACAATGCTGTCTGTACCACC;GAACGGCCAAACGCAGACCA;ACAGTACCTCGGGATTGAGG
Non-Targeting Control-CCGTCTCCGCATCGTCTTTT	1	1663	1	1.66808	0.834039	0.120216	0.785154	0.783895	TAAAGACCTGCTCAATAATG;TTATAATGCTATGAAGACCA;GACTGACATCCCGCCTGACG;TCGGCATGGAAGTAGAGTTG
TEAD2	4	423;11805;26018;44546	1	1.66771	0.833853	0.120381	0.785415	0.783895	GGAGCCGCACCACCTAACGC;GAGGATTCGCTGCACCACGG;AGAAGGCGCAGAGGTAAAGT;CTTTCAAGACAACTTCCCAG
TRAPPC3	4	2057;6165;15110;45044	2	1.49198	0.833577	0.175009	0.809113	0.809113	CCGAGGACGAACACGACCAG;CCAGTGCGCCCGCATCGTCG;AGCAGAGGAGAATCGGCCGG;TCAAGGATGGAACAAGACCA
ZNF549	4	1347;7686;20254;52806	2	1.31918	0.833195	0.255681	0.840189	0.840189	GGGGTGTCGCCGCTACCGGT;GGCACGCTGAGATCAAGATT;GCAGGACCATAAGGAGCCAT;GTGATGATAAGCCTCAAGAT
ZNF45	4	1361;7644;42084;48794	2	1.32342	0.833191	0.253374	0.84141	0.840086	ATATTAAACTCAATCAGCTG;TCGACAGGCAGAGATACGGA;AATCCCTATGAGATGATCCG;GGATTGGGTAAATACAGCCA
TCTA	4	425;11766;53359;54497	1	1.66569	0.832846	0.120885	0.78544	0.783895	CTGAACTTTGTACTCAAGCA;AGGAAACTCCGAAGTCTATG;GAAATGCATTAAGTTCAGTG;CCAATGACAAGGAAACCGAT
FNTB	4	3526;4774;9419;16631	2	1.69729	0.832546	0.113097	0.792185	0.783895	CCATTGAGTCATATGAAGGT;TCACTTGGTATACTGTGAAG;CATATGAACACAAAACTGTG;GCCACATTAGAGGACAACAC
SLC12A7	4	3416;4845;30580;43610	2	1.68532	0.832497	0.115924	0.78826	0.783895	AATAGACCCTGAGACACAAA;ATCTTTATACCTAGATCTCA;TGCAACCTGCTACTGGACGC;TACAGCTAATGGTGAAAAAT
Non-Targeting Control-CTTTTCAGCTGAGACGTACG	1	1675	1	1.66496	0.832478	0.120994	0.784528	0.783895	GCAGGCAGGCACTCACAGAC;AGCGCTCCCGCATGCCGGTG;GCAGCACTCGCCAAAGTCGT;TGACTGGCACACAGGTCTCA
PTGES2	4	426;11115;27455;27465	1	1.66469	0.832344	0.121166	0.784833	0.783895	CTAAAGGAACCCCTTGCATG;GTGAAACACCCCCTCCCGTG;GTTGTAATATGTGTTTCCCG;TCGATATGTTTGTACGAACA
CT47A12	4	3509;4805;11202;47134	2	1.69204	0.831395	0.114355	0.789554	0.783895	TCCCAATCCTGAACATATTG;AAAGAAGGATGCGATCGTGG;GCTGGACACCTCCTTAAGCT;GGGATCGCCATGGAGACCAG
EFR3A	4	1818;6620;44552;47084	2	1.43569	0.83132	0.19781	0.820896	0.820508	TGGAGCGGCGAGTTATTGAC;CACGCTGATACTGACTACAG;AGTAGTAGTAATCCCCAGAT;GCTATACCTACTAGACATGG
KRTAP6-1	4	429;16874;21752;61524	1	1.66169	0.830846	0.121912	0.78642	0.78642	TGTTCCTGTGTGCGCAAGAG;ATCTGTCCTTAACTCATCAA;CCAGTGCAATCCTGTTCATG;AATGCAGAAGAGGCTATGGA
PLCG1	4	1888;6517;22905;46276	2	1.44805	0.830372	0.192551	0.819647	0.819305	CGGCGGTTGAGAATGATGTG;GATAGGCACCGTCTATAACC;ATCCTGCTCGACGACATCGC;CTGGATTTACCACGACGGCG
Non-Targeting Control-CGTCCCTTCGTCTCTGCTTA	1	1693	1	1.66031	0.830157	0.122213	0.786747	0.786747	TGAAGGCGACCCCTTCTACG;CGTACACCGGGATGCGCGTG;CCCTACAGCGATCTCAGCAA;ATGGTTGTAGAAACGAGTGA
MPZL2	4	431;21243;32121;51510	1	1.65971	0.829853	0.122429	0.787332	0.787186	CCATGAGGCCGGACCCGATG;ACTACGGACCAAAACTGTAG;CGTGCAGAAGGTAAACAACG;TTGCTAATGGGAAAACTGAG
HARS	4	3670;4746;17455;24483	2	1.70207	0.82919	0.112037	0.793607	0.783895	CCACGTCACGCCAACAACAG;GAATGTTAGTAACCCGACCT;ATTAGCAGACCGAAACAGGA;ATGATGAACCACTCCCAGGT
MARCH6	4	1607;7120;47849;60658	2	1.3786	0.82894	0.224213	0.832092	0.832061	GAGGGACCAAATCAAGACAT;TCTTGCGGATGGCGTCAACG;TGAAGATCTCATCCTCCATG;CATCGACACGCTCAACATGC
Non-Targeting Control-TCTCGTAGCCTAATGCGCCA	1	1710	1	1.65597	0.827987	0.123283	0.788782	0.78756	ACTGTAGTCCTGAGTTAGCA;GCTGCTTATGACATCAGGAG;CCAGGTTATCTGTGAAGTGT;CTTACATTCACAAATGAGAA
CEACAM7	4	435;45591;50923;56993	1	1.65576	0.82788	0.123443	0.789008	0.78756	TGTCCTGCATCCCTACACCT;GAGCCAGCATCATAGCACAT;GAGGTCTTCAACGACGAATG;TGAGTGCCCGGATCCGAAGG
PCDHB14	4	436;28507;54302;66556	1	1.65478	0.82739	0.123694	0.788205	0.78756	AAGAGATTCGCTCCTAGGAA;TGAGGAAGACCCTGTGACGA;GAGCTTACCGCAAATTTCAA;AATGAACGACTACAAGCTTG
EIF3CL	4	2018;6373;36582;42059	2	1.4657	0.827363	0.185274	0.816322	0.815941	TGCTGGAGGAGATATGTGAC;AGGAGCCAGGATCTCCACTG;TCTTTCCGGATCAATCCAGA;AAGAACTACGTACGTGTAGT
ABCB7	4	2593;5634;16881;65776	2	1.56377	0.827082	0.149881	0.805565	0.7989	CTCCTCTATCTGGTATGCAA;TCAGTGGAGTGAGCTGACCG;CCTGGCCAACAAAACATGGA;TCCTTGCTAGCCAGATAGAG
NRF1	4	437;11622;15874;39428	1	1.6538	0.826901	0.123942	0.788184	0.788184	ACTTGAGAGGAAAAGACTCA;TCTGACGTGACACTGCCATG;ACAGGTGCATGTAGCGAATG;ACCAATGGTGAACTCGTCAA
LRMP	4	1649;7083;48447;58278	2	1.38267	0.826801	0.222211	0.831539	0.830415	TTATCTCAAGCTCATCGACA;TTTATATTACAAGTTGGCAG;GCAGCTGCAGAGCCATCCCG;CCCCGGCATAGAACACACCG
RPS7	4	2964;5293;20739;30402	2	1.61388	0.826586	0.134719	0.798525	0.798017	TCTCCACGCTTAGAATCCAG;TCAGCGTATCGACCCGACTC;CCGAGCAACTGCATTCCATG;GGCAGAAGGTCCTACCACGG
PDGFA	4	438;37035;39478;48525	1	1.65283	0.826413	0.124192	0.788974	0.788974	CGTCATGCCTAAGTATTATG;CATAGGAAGGAAAATCACCT;GCGGGCCTGAAGGAGGACCT;TATTATGAGGACAAGCCGCA
SLC19A2	4	2552;5699;41356;56201	2	1.55459	0.826092	0.152901	0.803915	0.7989	GGAAAGACAGGTCTGCTGGG;GTGTGACTTACCCACTGTTG;ACACTTCCAGTACTCATCCC;CTGTCTTTCCTTCATAGATG
MAP2K1	4	440;11557;21286;64713	1	1.65088	0.825441	0.124682	0.790491	0.790491	GGCCAGGGACTACTACACAA;CGGCTGGTGGACTATTTGGA;TTGATGGCGTGTGAGAAGCC;GTGATAGCTGCTACAAACTG
RNF39	4	1421;7709;27299;29432	2	1.31687	0.825106	0.257059	0.842075	0.841032	GAAATCAAGAACCTCAAACG;AGCGAGGAGACCTATCGTGG;GGATGGAAGCCAGTACAACC;GATGACATCAAAAGTCAAGG
EDA	4	441;26002;38435;50988	1	1.64991	0.824957	0.124927	0.791245	0.790582	TGGCTTATATGTTACCATGG;TCTGAATGGCCTGATAGAGG;GCTGTATACGAACGGCTCTG;AGCGTAAGTATAGCTCACTG
MYL7	4	2383;5934;12485;51819	2	1.52234	0.824283	0.163949	0.808547	0.808072	TTAAAGCATGTAACTACACA;CGTATCTCCAGTATTGACAC;TTGGTCTAGGTGTACCTCCG;AAGAGAAGGACCCATTACTG
GTPBP10	4	2473;5833;52449;68420	2	1.53603	0.823999	0.159186	0.807238	0.806013	CTGGAGACCGACCTTTACCG;AACTACAAGACCTTCATCCG;TCCGTGTCATTGGCTACCTG;CCATATTACAAAAACCATCG
CAND1	4	443;25555;26693;67310	1	1.64798	0.823991	0.125427	0.792015	0.790583	GAGATCCTGCGATAAAACTG;TGATACCCATGCATACAATG;TAGAAGAGCTTGTACTGACG;ACAACCAATACGGTGCTGCA
LRP10	4	3243;5126;69074;69675	2	1.63972	0.823806	0.127591	0.790583	0.790583	ATACTTACGACAGCGCCAGG;CCAAGAAACCACCGGCGTCG;TGTGTCCCTTCATTCCAGGG;GGGGTCCTTGAACACCAACA
PREB	4	4140;4591;34604;50936	2	1.72906	0.823518	0.10592	0.785708	0.783895	AGACGCGCTCCGCTACATCA;AGGGTGACGTGGGACCTGCG;GGTGCAGACACTACCCATCG;AATGCCATCGACAAGATCCG
GABRA5	4	444;12897;33401;35580	1	1.64702	0.82351	0.125689	0.792873	0.790583	CTTCTCTCCATCGATTCCTG;ACAGTGGTGATCGACTATGA;CAGTCCAGGACACTTACTGG;TCCACACCGTTCTCTCCCCG
PDCD7	4	3863;4736;16277;23065	2	1.70378	0.823479	0.111578	0.793937	0.783895	ACAAGGCCTGTCAATCAAAG;TTCTCTCTTAAGTAGCCTAG;CCTTGGGTTCCTACGCCCCG;ACTGTCATTTCCATACCTTG
CHURC1-FNTB	4	1516;7501;14312;31361	2	1.33804	0.823338	0.24531	0.839021	0.838583	GGATGAAATGAACTTACCGG;CGGGAGAGCCACGTTCACCT;TCACTTACATTGGAGCCTGG;GAAGGGCCAACTTTGCCTTG
TESK2	4	2309;6055;32446;55700	2	1.50628	0.823068	0.16973	0.80973	0.808072	AGGGACATACCTTTAAAACC;CCCGGCCTCAAAGGCCAACG;TGGGAATCCCGTAATTCCAG;ACTGCACCTTTGGATCCTCG
SRSF11	4	445;17172;37070;57692	1	1.64606	0.82303	0.125946	0.793699	0.790583	AAAAAACTTACAAGTCCAGG;TGGAAAACCCATATCACCGA;GATGACATAATTATACTACC;GTCAGACTATAACCCAGCCG
PFDN6	4	1917;6660;12449;42226	2	1.43095	0.822632	0.199849	0.822838	0.822154	GCCAGGACCACCAAAATTGG;AATACTTCACCCACTCCAAG;TGGGATTGATGGACTTGATG;AGGAACTTGAGGGTATGGCA
NT5C1B	4	446;10760;29305;68699	1	1.6451	0.822551	0.126204	0.793734	0.790583	CCAGCTGTCAGCATACTGAA;TGGTCACACCCTCCCGTCGG;GTTTAGCGATACCTATCACC;ATCCAATAGGAACACAACAT
FKBPL	4	3331;5095;33603;40749	2	1.64462	0.822078	0.126295	0.793511	0.790583	TCCAAGCATTGAACTACGTG;CGACGTTCTACGGATCACCT;AGAGTGTGCACGACTGCTGG;AAGACTCACATTCGGCCCAG
TRIM43	4	447;26482;56763;68648	1	1.64415	0.822073	0.126467	0.793796	0.790583	TCTTTACCTATAAAGCCAAG;AGGCATCACCGGCATAGTTG;CCTGGATATCCTGAGCGACC;TGCTCCAATCAACTTACCGG
NCK1	4	1934;6656;23710;29406	2	1.43142	0.82161	0.199616	0.822958	0.822154	CATCCCTGAGGACTTACAGG;GAGACTTACGTCGATGCCGT;GAACTCACCACTTTGCCGCG;CCTGCCCTTTAGGGTCCCAA
PTCHD3	4	448;42311;44539;75190	1	1.64319	0.821596	0.12672	0.79301	0.790583	GGGGGTCTGTAAGGACAGCA;GCACCCATAAAGGCTGCTGG;GCTGACGATCAGCTACCCTG;TGCTAACCTCTCCTTTCATG
Non-Targeting Control-CCTCGGGCGTAAATACTCAT	1	1762	1	1.64297	0.821483	0.126763	0.79249	0.790583	GAGGGTGGCAAACCCCTGAG;ACGGAGCCAGCTATATCCAG;CGGGTACCCCGGCATCACAG;ACTGCTCAAACCAAAAAGCA
KRT18	4	3792;4814;43131;63426	2	1.69052	0.821326	0.11479	0.78909	0.783895	CCATCTCACAGTGAATAGGT;CTTCACATCGCCTGACTCTG;CCTGGCAGAAATCAGCACGC;GAGTTTCATCCTCTCCAGTG
TIGD6	4	449;11824;23794;61122	1	1.64224	0.82112	0.126993	0.791566	0.790583	TAAAAACTTACCTGATGAAG;GTGTGATAATCTTGGTACAC;AAAATCCTGTAGCTGTGCAG;TCATGAAATGCGTGAAAAGT
PRPF19	4	1793;6943;8735;11139	2	1.39828	0.820712	0.214752	0.828801	0.828801	GCTAGTCTGTATTGCTACTG;AGATGGTGAAAGATTGCCAC;AAACTTACTCTGAAGAATCG;CAGTGTGCTCTCAAGCCGGT
RASA3	4	450;9227;56472;73279	1	1.64129	0.820646	0.127243	0.791554	0.790583	ACTGCAGAGGAAGTTCGGTG;CTATCTCCACGACCAGAACC;CTACCAGCAGTGCATAAACG;GTAGTCAGCAAACATGCGCA
RBM22	4	3091;5310;20079;51571	2	1.6113	0.820394	0.135468	0.799195	0.798519	CCAGTTACATCAGTCGTGCC;GTGGTTTAAGACAAACACAA;TAGTAACTCCGAGCCAAATG;GTGGTGGTAAAATGCACTTG
UBL3	4	451;57550;60030;67767	1	1.64034	0.820172	0.127499	0.792359	0.790583	TCCTCAAATGAAATGACTCT;GATTGCTAGGCTATATCTGG;AATTCATTGAAGCTGCACAA;TTGTAGGTATCGTCAGATCC
PVRL1	4	4411;4523;31332;37315	2	1.74121	0.819998	0.103365	0.779646	0.779646	GGTTCAACTTCAGAAAGAGG;TGCTGAGCTGACCTACACTC;CAAGGAATATTATTACACCA;TGGGTTGGTATACCACAGGG
CREBZF	4	3383;5098;24537;32063	2	1.64414	0.819982	0.126485	0.793118	0.790583	TCTTGATGCCAAGCTCACGA;ACTAGAAGACCTTATCATTG;TGGCCGTGACATCCGAAAGA;TTCTCCAAAGACATACACTC
OTOG	4	3741;4872;49816;55152	2	1.68082	0.81975	0.11712	0.787021	0.783895	GATGGCTTTGACAGTATACA;CCTCTTGGAAGGCCTGACAG;TGGCAGCTCCTATGAAAATG;ATGACCTACTGTCAGTCCGA
MIS18A	4	1741;7082;8564;71403	2	1.38278	0.819506	0.222184	0.831934	0.830415	TCTCACCTCATTGGTCGCGG;CTCACGATACTCCTGGACGT;GTGTAACGTTCCATGACAGG;ACTCGGAGCGTAGAATCATG
SLC7A11	4	453;48115;52474;75702	1	1.63846	0.819228	0.128013	0.792419	0.791774	TCTTGGGGGACAGCTAACCC;ACTGGAGCTATTCTGATGCG;GTAGGCTTGACATTTAATTG;CCAGCTCAGTTTGTCCGCGG
CHGB	4	2977;5434;9101;19307	2	1.59274	0.818983	0.140954	0.804371	0.7989	CACGACACGAGACCCGCCCA;GCCAAGAGCTACGAAGCCCG;TCCAGCAACATCAAGCAGCT;GCAAATCCTTCCAAACACGA
SCFD1	4	455;14702;21095;25354	1	1.63658	0.818289	0.128526	0.793252	0.792774	AATCAAGGCAGGGATTGTAG;AGCACACAGTGATCTGCGAT;GCCTCACAGAAGGACCTACA;CACAACAGAGCATCGCTGCG
TRIM33	4	3281;5205;48971;72793	2	1.62738	0.818231	0.130918	0.793972	0.793112	GTGCAGTGTTCGTGTCGGAG;GCCACAGAGGTAGACGATGT;CCCAGACACGATCTACAGTG;GTGCCTTTAGACTGGACGTG
CBWD3	4	1496;7708;21969;21976	2	1.31697	0.818122	0.257029	0.842417	0.841032	GAAAAGTTCCTACCAGATGA;CTTCGTGCGCTTCACCACCG;TGGATCGGTGAGAACGTCAG;CTCACCGATCCACGTGATGA
RPS4X	4	3984;4765;23820;74660	2	1.69882	0.818077	0.112792	0.792698	0.783895	CTGATCTGTCCACGAACCAG;CTGGACAAAGATAGGCTGGG;CTGCAAGTGTATGATTTGCC;TCAGGAATGTCAATAAGCAG
CSTB	4	3780;4883;15978;70307	2	1.67899	0.817869	0.117476	0.786053	0.783895	ATAGAGCCGATAAAGGGGTA;GACAGCGGCCACGTAAGTGA;TTCGAGCTCTTAGGCCGCCG;GGGACAGGAGGTGCCGAGAG
HIST2H3C	4	2464;5980;8073;27669	2	1.51619	0.817864	0.166064	0.810075	0.808072	TCTCAACTGTAGGAGTTGGT;GCTGGCACAATAAAGAACCA;GAGTACTCACACCGAATGTG;AATGCCAATCTACCATCGAG
PLEK	4	2880;5551;59330;70209	2	1.57565	0.817516	0.146121	0.803216	0.7989	TCTCCGGAATTTAAGCACGG;CTTGCGCCGGTTCCTACGAG;TTCGTGCAAATCAGTTGGGG;GTCTCTGCAGTACATGCGAA
CATSPER1	4	457;11110;34700;35647	1	1.63471	0.817353	0.129014	0.793921	0.793007	GAACTTAATGCGATACACTG;CACGCCGATCCATATAAGCT;GAGTGGAAGACGGTTGTGGG;ATGAGCTCGTACACACACAG
MAGED4B	4	4384;4580;30151;52471	2	1.73101	0.817326	0.105452	0.786884	0.783895	ATGCGCTCCATGGCATCTGG;GACTAAATTAGGGTCTTCCC;GCATCGCGGCCGCGCCACTG;TCAGGACCCATACAATGTAC
ATP5L2	4	2317;6181;26997;71828	2	1.48992	0.817162	0.175779	0.809692	0.809217	CGGTCATTGCCTTCTGACAG;AGAACCAGACTAGAAACTGC;GAAGCGGCTGTCAAAAGGGG;AAGGCAATGACCGCTAAAGG
PLCD4	4	458;32811;58095;67822	1	1.63377	0.816887	0.129266	0.793916	0.793007	GCGTCGACCATTTCCCCTTG;ACGCGGAAATAGTACTCGCA;GGGAAGCGCGGGTCGAAGGG;CTCAAGACCAGGACCCGCCG
MLST8	4	3321;5207;13523;15086	2	1.62707	0.816608	0.13108	0.794188	0.793112	CAGGCGTCTGCGAAATCATA;TGTGGCTGATCAAAGAAAGA;TAGCATTCGTGCTATCCCTG;TTGCCAAAACCTCGGATGCG
CLP1	4	4406;4586;36859;76670	2	1.72995	0.816377	0.105697	0.786845	0.783895	GTTCTGAAAGCGGTTCCGGG;CCATGGGGGCCTCACCCGAA;GACATCCCGTTGTACCTGAA;GCTTCTGTTTCTCGCGCACT
SSBP1	4	1747;7162;16696;45923	2	1.37401	0.81612	0.226463	0.834036	0.832843	AGGCCTCGTTTCAGGTAGAC;CCAGGCGCCACTCGTACCTG;CCCAGCATAATCATACACTG;GGAGGTCAGTTTAGTTGGTG
DHX37	4	2998;5487;8805;15352	2	1.58495	0.815491	0.143285	0.803806	0.7989	GGTAATGCTGTATTAGCTAG;AATCAGGTGTACGTTTCTGG;CCATGTAACAATACAGAAAG;TCGAAGCATTCAGCAAACAA
RPAP1	4	3818;4904;17946;24725	2	1.67551	0.815487	0.118405	0.786407	0.783895	TGTTGGGCCAGAGCATCCGG;CTTACACACTAACCTTCCCA;CCGTAGGAGCCACTATGAGG;CCTCCTCATAGTGGCTCCTA
TMEM208	4	4214;4694;15321;35662	2	1.71102	0.815377	0.110003	0.79351	0.783895	CCAGCCATCTGGATCGACAC;GGTGGCGTAGTTAAAAGTGT;TGGGGTCCACGCCAATACAG;GATCACTCAAGACTACGGGC
Non-Targeting Control-GATGTGATCTATGGTTGCGA	1	1813	1	1.63057	0.815287	0.130088	0.794308	0.793112	AGAGTGGGTTACACAAGCTA;TCACTTTGCTCACTAGACCA;ACTGTCTAGAAACATTTGTG;TGTGGATCCTAACCGGAACT
LYSMD2	4	462;40700;71551;74875	1	1.63007	0.815033	0.130272	0.793887	0.793112	TTTATAACAACCGCTATGCT;TATCCATCGACGTTAAACAC;TTCATAATTATATCCAGAGA;GATACATAGGAGATACTGCT
RPL24	4	2009;6695;27649;29287	2	1.42683	0.815002	0.201646	0.822154	0.822154	GTGGTCGGGGAGTTTCTCCG;AAGCCGGTGACAGGCAACGG;TGAGGTATATTCATGGCGGG;AGGAGGCCAAGCCCGCATTG
RPL3	4	4012;4810;20050;24067	2	1.6912	0.814686	0.114587	0.789418	0.783895	ATGACAAGGCTTGATCACCA;ATATCAGCGAAACTCATTGG;GCCGCCCAAGTTCCCTCGCG;CTGGTGGCCGTACGCCGCGG
ASB11	4	463;45201;54533;61523	1	1.62914	0.814571	0.130525	0.793892	0.793112	TTAACAAACCCCCCTCTCCG;AGTGCATGTCGAATGTCCTG;TGTGAGAGAGGCCCGATCTG;AGTGGAACGATATTCTCGAA
CTR9	4	3829;4921;39324;52430	2	1.67271	0.814201	0.119125	0.78703	0.783895	AGGAACACCCTGTATATCCA;TGGGACCAAAGACCTTCCAT;GATTCTTAAAGCGTATGTGT;TGTTCATTCCTAAGCCCAGA
C16orf82	4	1673;7380;18081;36425	2	1.35067	0.814179	0.238576	0.837415	0.83717	CCGGCAGCAGATCCGAGATA;TAGGGGCCACAAAGGACATG;CCCCGACGCGCAGAAAAAGG;GGCCAAGCACGCGCGCATGG
RBL1	4	464;35524;49738;52742	1	1.62822	0.814111	0.130789	0.794726	0.793112	GCCACTTCCGAGACAAATAC;GCGGCGAGGATAAGGGAGAT;GGAGTATCAGAAGCAACTCG;AGGCAGAGCGGGCCACACTG
VARS2	4	3878;4900;16394;43094	2	1.67617	0.813804	0.118204	0.785902	0.783895	GTGTGCACTCCATGCCACCA;GTACTCAAAACTGTTTACTG;AGCAGGGAAATCTTCCATCA;GCATCTTGAGGATGACACAG
Non-Targeting Control-CTGCACTGTGGAGACGCCCG	1	1830	1	1.62652	0.81326	0.131152	0.79386	0.793112	GGTATTCTACAGAAGCAACG;GGCAGTCAGCGCCAGCGCGT;TGTGCGTCATGTATACCCAA;ATGTCTGGCAACGTACCCGT
MYH10	4	466;45078;46045;54928	1	1.62639	0.813194	0.131298	0.793978	0.793112	CGAGGAAGGTATCATTTCGG;GGAAATCTATAAGACCAACG;TGTATGACTATGACTCCAGT;CTGGGAACCGCTTATCACTG
NIPSNAP3B	4	467;20737;66364;68808	1	1.62547	0.812737	0.131552	0.793225	0.793225	CCGGGCTCCAAACCCCAAAG;GTCTGGGATTACGACTCTCG;CAGTTATAAGAACTCAGGAG;TACAGGGTCAACGACGACCA
KAT7	4	1600;7605;22965;29036	2	1.32738	0.812456	0.251158	0.841166	0.840086	TCAGTCAGAGCATTATGTAA;TGTACATTGGGAGAGATCGT;GGTATGGCACTAAAAGCAGT;AGCTATAGGGAACTTTCTAG
RBBP7	4	3050;5505;10679;46571	2	1.58233	0.812429	0.144069	0.803894	0.7989	CTATAACATATACCACCCCA;TCACCTTCAGATAATACATG;AAACATGTGCCATTATTATG;TTGATCTTGGCAGTTTCTAG
DNPEP	4	2540;6015;26965;47225	2	1.51155	0.812359	0.167777	0.810257	0.808072	CATTACAGCAGAAGTTCTGG;GAAGGAATCAGTATCTGGGT;CGGTGCAATACCGAACGCAG;TATTCCTGAATACCTGTGTG
EIF6	4	2274;6355;29854;50428	2	1.46793	0.812295	0.184338	0.816206	0.815941	TTTGGACAGCCCACTACACA;GACAGGAGGACAATCCCAAG;TGAGAGCCACGCCATACGGG;AGTAGCGGAAACGCGCCACG
ADAP2	4	468;24556;32080;37950	1	1.62456	0.812281	0.131803	0.793979	0.793979	TGGGGCAGGAAACATAGGAT;AATGTCCTGGAAACACTTCG;CAGTTGACTTCAACCACAAG;ATCCGCATTCCAGGTCAGGT
KRTAP4-5	4	2182;6497;29578;56220	2	1.45048	0.811923	0.191546	0.818696	0.818527	GCGTGGCCTATGCAAGAAAG;CATCTGTGTGAATTACCTCG;CAGAAGCCACGGTCATACCA;CCCATGGGCAGTTCAAATCG
MCAM	4	469;24201;67800;74001	1	1.62365	0.811826	0.132064	0.794788	0.794676	GGGCAAATGGCCAGTCAAAG;ATATATTGGAAATCTAACAT;TCCCGTGCAGCATTTCCACA;CTAGCTGGGCCTCCTAATCG
ENOX1	4	471;14499;32874;62291	1	1.62184	0.810919	0.132555	0.796217	0.794676	TAAAGGATTTATCAAACCAG;GATAGGTACATATCAAACCA;AACTGGCCATCATTCAAGAG;AAATACTGGGACATATCCAG
ZNF471	4	472;32216;34271;35773	1	1.62093	0.810467	0.132804	0.794676	0.794676	TCACCCCTTACATTGAAGCT;GTAAAGCATGGAGAGCGTTG;CTGTAGCCAGAGAACTACTG;TCAATGAGGACGATGTAGCA
PTPMT1	4	3241;5391;11937;40528	2	1.59913	0.810353	0.139018	0.802069	0.7989	GATAGATCAAGATCCCACTC;AGGGTGTCAGAATACCATGT;TTGAGGAACAACATCTTCCT;TCTGTACTACAGTCATTAGG
STK10	4	2455;6189;31017;59538	2	1.4889	0.809243	0.176217	0.809338	0.809338	CTGGTGTCATCACTCAAGGG;CAGGCCATAGCGCTTCACCG;GCTACGAGAAGGCCTACGAA;GCCCGAGTTCCACTACATCG
DAPK2	4	476;9693;19581;42524	1	1.61734	0.808669	0.133829	0.797014	0.797014	GCTGTAGACTCTCCGTCACA;TCCAGTAGTGAACTCCTGTG;GAAGGTGTATCTGTCCAGAG;TGGATATCCCCTAACAGAAG
NADSYN1	4	2923;5698;8839;59845	2	1.55473	0.808647	0.152877	0.80446	0.7989	AGATGTGGATGAATGCCTGT;CTGGCCACAGAACGGTCCAT;GCTGGCTCTGGCACTCGTCG;TCCTCACCATCAGCGCACGT
ARIH1	4	3192;5467;12645;24680	2	1.58788	0.808524	0.142448	0.804133	0.7989	AGTTAGTAACTGAAATACCT;CCACAGCAGTCACAGGCCGG;GTTACTGAGAAGCGCAGAAT;ACATATCAAAAACACCATGC
SNAPC4	4	4283;4783;14881;56527	2	1.69576	0.808352	0.113532	0.792581	0.783895	GGCTAACAATGGTACCGATG;TGGAGTTGGCACCGTTACAG;TGTGGAGACTGAATAACTGA;AGCTGTACTAGAGTTACGGT
ARHGAP27	4	477;14426;19257;77010	1	1.61644	0.808221	0.134087	0.797791	0.797347	AGAATGTTCAACGACGCTGG;TAGGCTAGTACTGACAGATG;CCATAGAGACAGTTTCCCGT;AACAAATTCTGAAACGTGTG
MYO9B	4	3704;5110;30748;53609	2	1.64224	0.808113	0.12687	0.791586	0.790583	AGTTGCCAGGATGATAGGAG;GAGTGCTGAAAAAAATCCGC;GCCTCTGTGACCATAGACCT;TTCACGGTGAGATTGCATCG
CCDC28B	4	478;25595;27300;67987	1	1.61555	0.807775	0.134348	0.797836	0.797347	AGAAGAAGGAGTACGTGATG;AGGCTGTTAAACGGTATCGG;GGCGGAGGCTCGGATAGCGG;CGGTAACGACAACAACCAGG
FER1L5	4	2995;5652;20714;65586	2	1.56121	0.807705	0.150808	0.802987	0.7989	GGTGGCCAGAGCGCCCCAGT;AGCGAGAGGACGTCGGCGAA;GCCGCCGCTACCACCCCGCG;GTTGGTCTGTGCCAAAGTCA
ARL9	4	4524;4685;28321;31628	2	1.71258	0.807464	0.109567	0.794016	0.783895	CGGTAGGAGAACATCCCGGG;CATGACAGCCAAGGACCCCG;GTCTTGGGCCGTCACCAACG;ATCCCAGTGCTATTGTTGAA
MED12	4	1988;6929;16850;21567	2	1.39987	0.807414	0.214006	0.828465	0.828465	CGAATGCAATCAGATGCTAG;GCTGGTGGACAAGTTTAACC;ACCGAGACAGTCGGGACCGT;TCCATGCAGTCAGTGCACAG
NAT8	4	480;28950;35074;52773	1	1.61377	0.806885	0.134839	0.798484	0.798017	GCATATATCAGACTAGCACG;TGCCTACCTGAGCTAAAGCA;TACTGTACAATTGTAGCACC;ACAATCCAGATTTCTAACCC
HARS2	4	4062;4932;57290;58809	2	1.6709	0.806424	0.119482	0.786077	0.783895	CTCATAGTAGAGCTTGCCGA;GGGCTGCCACAGATACGCAG;GACATTTCGCAGGATAAAGG;GGAAGGCTGCTACCTGCACA
MATR3	4	2942;5732;21097;50647	2	1.54997	0.806234	0.154403	0.801086	0.7989	TGCCAGTAACATGCTAAAGA;AGTTGTTGGACATTATACTC;TAACAACGAATGCCCAAAGG;GCTTTGGATTGCAGAAGACC
NMB	4	3760;5112;21880;63138	2	1.64193	0.806165	0.127036	0.791046	0.790583	GAGGAGCCGATGAGAAGCGT;CCGCTCCGATGTACTCACGC;CCAACTTACGGCCAACATAG;TGGCCAGGACAACACATGTG
TUT1	4	3672;5170;22889;23742	2	1.63282	0.806041	0.129538	0.793262	0.793007	GAAGAACTAATAGAGAAACC;CATACCATGAGGCACCAATG;TGAACTGGTAATCAACGTTG;GTAGGTGAAATCGCCATGCT
RBM28	4	482;10194;40534;59725	1	1.612	0.805999	0.13535	0.799255	0.798519	CTCTCCGGGAGAGCTGACCG;GAGAACTTAATCGTTCCTGG;CTGGTACGATGGCGTTCGGG;GTACGGCGGCATGTTCGCCG
CNOT8	4	3423;5342;16583;53389	2	1.60647	0.805957	0.136925	0.801024	0.798519	GGCAGGTTCTGTCCTAGTGC;GAAGGGTGAGTACCCCCGCT;GCCACAGTCCCTCAACCCCA;CGGACTCCCTCAGCTCCCTG
NUP88	4	2308;6469;23310;31698	2	1.45388	0.80566	0.190094	0.818056	0.816646	TTGGACCAGGCATCCCAGCG;ACCACACTCACAATATTCAG;CCAGAACAAACTGCTCCCCG;GAAGGTGGGCTCCATCCAAG
CPSF6	4	4375;4787;43487;46188	2	1.69509	0.805595	0.113613	0.792264	0.783895	ATAGAAGGTATAATGAATCT;GGCACAGAGTCAATTAAGGG;ATTGACCACTAAACAAGGGG;GACACCTGTTACAGTAGACA
KNTC1	4	484;14991;39887;51646	1	1.61023	0.805117	0.135874	0.799341	0.798519	AGACGACTGTATCTCTGTTC;TATGAGCGCCCCAACTACCA;CAGTGGTGCATTCGTAGCTG;ACAGAGCCACACTCACCGGG
KIN	4	3105;5613;9035;18690	2	1.56675	0.804973	0.149028	0.806498	0.7989	GGACGACCGAGGTGATGCCG;CCTCATCCCGCCTCTAGAGA;GTGCCGGTGACCAAGCACAG;GGTCTGTTCTTCGGTCCAGG
N6AMT2	4	485;25839;38691;43279	1	1.60935	0.804677	0.136108	0.799968	0.798519	GCAGCAACATGGCAAGACGG;AACTGGACATATCCCAACAG;GCCCATACCAGCCATTTGGT;TTTGCCCGAGCATATGCACA
DHX9	4	2352;6446;17479;58277	2	1.4567	0.804118	0.188883	0.819581	0.816646	GGAGGCTTGGAGAGACCAGG;GGTGTTAAGAGAAAAGACCA;GGTCTCTCCAAGCCTCCCCC;CACCTTCAACTAATTGGATG
ZNF518B	4	487;37398;63738;65907	1	1.6076	0.803801	0.136624	0.800008	0.798519	TTGAAGTATCATCGGACCGA;GTCGTAATTCTAACTCCAAG;GATGTCAGACTATTGCCTCA;CCCCGGGTCAGAGTCCAACA
SREK1IP1	4	3376;5422;20764;36494	2	1.59452	0.803701	0.140448	0.805875	0.7989	CAGATGGCTGTAACAAAACG;TGAAGATGATTAATCAAGAG;ATAATGAATGTGCTGTACGG;AGATATTGATACTAGACGCA
UTP11L	4	3817;5124;15920;29603	2	1.64003	0.803692	0.127546	0.791867	0.790583	CGTGGACGAGGACTAAATGT;GACAAAGCTGAAGTTAGCAT;GATGCATTTCCATCAGTCTG;AATATCAGTTTCTCTCCAAG
MARS2	4	4018;5009;10035;23844	2	1.65837	0.803562	0.122736	0.787694	0.78756	TATTCCGACACCCTCCAACA;AGTCGTGGCTGGAGCCCGTG;AAAAAGCCTGGATAACGGAA;AGAACTTACAAACTCCTGGT
CCDC84	4	4151;4938;18060;54528	2	1.66992	0.803485	0.11973	0.785241	0.783895	TTCCATCAAGAACGGCACAC;GGCATTGTTATGGTACTCCG;GGGCTACACATTAAGTGACG;GTCGCTGTGGAAATACACGG
RAD51	4	3017;5738;17724;19142	2	1.54914	0.802749	0.154668	0.801139	0.7989	CTTCCATTATTTCAGGCTGA;TAGGGGATAGGTTCAACGAA;AGAAAGCCTTTCAAGCAGTG;AAAGACACTGTCTACACTAA
TXN2	4	1892;7236;11212;51572	2	1.366	0.802739	0.230515	0.835733	0.833967	GGGGGGATGGCAATAAATGA;TTTGGGCGACGTACCACAGT;TTGCTATAGCTGGTCTACGT;GGGTTTGCATAATATGTGCG
PYGO1	4	490;32078;51167;67446	1	1.60498	0.802492	0.137382	0.800714	0.798519	CGCCAAATAGATGTCCCCGA;TTGCTCTCGTACAGCAACTG;TTAGTGTTTAGAATCTCCAG;CCGGGTTCTTACCGTATGTG
KANSL3	4	491;10812;20131;26600	1	1.60412	0.802058	0.137641	0.799257	0.798519	ATGTCAATGATATCTGATGC;GGTTCAGCCAAACCTCCAAG;GCAGTCATACCTACCCGGCA;GGGGCATGATTGACTGCCCG
Non-Targeting Control-GGAGAGGGCCCGCGAACTCA	1	1927	1	1.60409	0.802045	0.137641	0.798519	0.798519	TCTCTTCAGCATCAATACGG;TATTGATGTGGAAAATGTGG;GAAGAATGTACGCTTTGACC;GCTCACGCAGAATCTCTCGA
ETV3L	4	492;28972;38069;69285	1	1.60325	0.801625	0.137899	0.799279	0.7989	AGTCCCTCAACAGTAATGAT;CCTGTAAAATTCATAAGCCG;TTCTGAAAGCAAGCTAGGTG;GCACCTGAACGGAAGTACAT
NDUFAF1	4	3660;5266;15696;28269	2	1.618	0.801502	0.133611	0.796471	0.796471	GGACTCGGAAGATCCTGAAG;TCCGAGTCCTTAAAGTCCAG;GATCACCGACCAGTATAACA;GGCAGTAGAAAACTATGCGA
KRT32	4	493;29933;54575;58958	1	1.60238	0.801192	0.138157	0.800035	0.7989	ATGGGGCCTCCCACTAGGCG;ACATGTGTAGATCGTAGCTG;GGCTTTGTTGTACTCGCCGA;AGGCCCCATGGACGCCAGCG
MLNR	4	4319;4898;34015;54498	2	1.6765	0.800933	0.118164	0.786465	0.783895	CACATTCAACCAACAGAGCA;GTGGACAGCAAACTCCACTG;CTGTGATGAACACAATGTCA;CCTTTGCTCGTGGAAATGCC
AGBL4	4	2906;5891;16885;64991	2	1.52814	0.800528	0.161923	0.80807	0.807553	CTCTCTTCCCAGGTGCACGT;CGTGTCATTCAAGAGCCAGG;CAGCACATCGCCGACCAGGT;ATGACACGGCCTTAAACACA
RBM47	4	3816;5186;17993;40157	2	1.63033	0.80049	0.13013	0.793795	0.793112	ACAAGTATAAAGTCTCCAGA;CCCTGGCACAGGGATTGACC;CTCTACTATAGGTAGCTACA;TCGAACTCTTTATGACCATG
VWF	4	495;20132;62859;72632	1	1.60066	0.80033	0.138646	0.80139	0.7989	TTGGCTGGACCAAATGCAAG;CCTACTTATATCGAGTCCAG;GCTGGGTCACTTCCAAAGGT;GATTCTCGGCAGCTGACGAC
ZFYVE16	4	4421;4859;27608;45113	2	1.68298	0.80032	0.116588	0.786813	0.783895	AGAGGATGGCCCTGTTGGCA;GTTTCACCAGAGCTTATGAC;CTGGTAACGTTTCCTCCCAC;AGGCTGTTTCTCTGCATTCT
ZRSR2	4	496;31922;34164;42289	1	1.5998	0.7999	0.138906	0.802156	0.7989	CTTCGTATCAGAAAAGGCAG;GATGGGATGATGCAGAAACC;GTCATCTCCAGAGAAACTGC;TATCAGCATTAATTTCTCGT
AGGF1	4	3856;5174;28388;48027	2	1.6322	0.79984	0.129623	0.793007	0.793007	CGAAGGACTGTCACATTCCC;TCCTTGTTTCCTTGCCAACA;TGCTATTCCACCCAGCCAAT;TTCACTGGTTTCAGCAAAGA
TGFB2	4	499;31532;51848;58842	1	1.59723	0.798616	0.139655	0.804264	0.7989	CATCAAGGAAGCAGCAAGGT;AAAATCTTCGAAATGCTTGA;CCTTGCTGCTTCCTTGATGA;ATTAATTTCTCGTTGGCTTT
PCDH17	4	501;36819;56187;65269	1	1.59553	0.797765	0.140177	0.806532	0.7989	CCGAGGTGGTCGGAGTCGCA;CCTCTGGGGCAGCAGCAGCG;TGAGTTGACGGTTCTCTATG;GGCCGGAGCTGGTAACCAGG
TUBA1B	4	502;9994;14389;39043	1	1.59468	0.79734	0.140403	0.806353	0.7989	CTCAGATATCGGGCCCGCGA;GCGGGGGGAGGTTGCCCCAG;GGTGGTCGCCCGTCGCTACC;GACGGTTCTCTATGAGGATG
EFTUD2	4	2778;6096;30323;63716	2	1.50092	0.79723	0.171585	0.80936	0.808072	AGGAAGAGGAGGAGGAAGAG;AACTCAGCCGCCTGATGGTG;GGCCGGAGTCGCCGCCCTCC;GGGGCAGCAGCAGCGGGGGG
C1orf189	4	503;25935;68179;73047	1	1.59383	0.796917	0.140657	0.805603	0.7989	GGAGGAAGAGGGGAACGAGG;GCCCTCGCCCGCCCGGGCTG;GCCCGTGGAAGGCCTCGGGG;CAGCGTGTGGCCCCACCATC
HSPA1L	4	504;27390;39709;73892	1	1.59299	0.796494	0.140909	0.804844	0.7989	GTTACCAGCTCCGGCCGCCT;AGAGGCGGTGGAGAAGGGAG;TCTGGGGCAGCAGCAGCGGG;CCGAGGAGGACTCAGATATC
C1orf94	4	3234;5690;20007;36873	2	1.55585	0.7962	0.152442	0.805544	0.7989	CTTGCTAAAGATGAAAGATG;TAATAGTAGAGGAAAAATGC;GATTTCAAGCGAATGAAGAA;AAGAGAGAAAAAGTTTGCTG
TUBB8	4	3468;5509;17055;55730	2	1.58174	0.796089	0.144278	0.802923	0.7989	GGTTAGGAGTCGGCTTTACG;TCTCCAGCTGTTCAGTGGCA;TGTGCTTGAAGAAGACACAA;TCAACAAGATGAATTGATGG
C1orf168	4	505;31506;62931;65461	1	1.59214	0.796072	0.141176	0.804177	0.7989	CAACCTGTGAAAAGCTGAGC;GTTAGGAGTCGGCTTTATGT;GGAGGAAAATTACCGAATAG;AACTTAGATGATCCTCCGAA
CCT3	4	4353;4971;47254;64205	2	1.66453	0.796008	0.121188	0.784167	0.783895	ATGATGAACAAAGTCAGATC;TTGGTCACAGATTACAACTG;CATACCTTTAAGTACTACTC;GTGATCCCTCAATTTCACGA
CDH2	4	3305;5638;60746;65449	2	1.5632	0.795921	0.150104	0.804012	0.7989	TTACCCCAGAACCAGACGGA;GAGCAAACTGCGTTATACAG;TTTGTGCAGTTATGCCAGCA;CGATCCAAATTTGAACGCCG
HS3ST2	4	506;30492;42156;63737	1	1.5913	0.795651	0.141413	0.80407	0.7989	TGTACATAAGAGGCCCCATG;GCCCACCCTGGCTCACCGTG;CCTGTGTCCCGGAATCGGCT;CCCCACCACCACACACCTTG
MBD3L5	4	4675;4831;8811;49551	2	1.68767	0.795307	0.115381	0.788838	0.783895	GGCCTTTCATGACAACCGGG;CATAGTAGTCAGTGTGTACA;AAATCATTCTCGAGGCACTG;CTGTACGCACACACCATCGC
CDSN	4	507;7759;9655;51942	1	1.59046	0.79523	0.141674	0.804827	0.7989	GGTCCAGCAGGTCTGTCACA;TGTGCTCAAGAGGCCTTATG;TATGCACAAGGGTTTCATCG;GTGGTCCCCTCAATCTCTAT
CT45A5	4	2100;7069;29390;38294	2	1.38422	0.794909	0.221459	0.832194	0.830415	GTTGAAAACAAGAAGCACAC;GGTGAAAAAAAGTTGAAGAC;TTATTCATCAGCCCACGCGG;ACAACTTGATATGGAACAGG
SPIN4	4	508;34253;37141;61228	1	1.58962	0.794811	0.141934	0.80485	0.7989	AAGGGCCTATTCTGTCACTT;GGCGTTGTCATTGGTAACCC;GGTGGTACGGTGTACCGCAG;AAGACTCGACTCACCCGCGA
ANKRD7	4	509;25989;47066;68746	1	1.58878	0.794392	0.142172	0.805472	0.7989	TTCCATGCTAGCAATGCACG;CCTCACTATCCAAGGACTGA;GCAGATGGAATCATCTAGGA;TACCCACCGCCATACTACCT
BCS1L	4	1964;7332;23076;35583	2	1.35574	0.794326	0.235874	0.837759	0.83717	AATGGACAGTTACGAGCCAG;GGAAATGTACAAGCGTACAT;CGAGGGACTTACACCGAGAG;AGGAGCCCGAGCTTCACTGA
Non-Targeting Control-AAAGACTTGCTCCAAAACAC	1	1999	1	1.58816	0.794079	0.142283	0.80465	0.7989	ATACTTACGAAAAACTACTG;ATGCAATGACTCGAGCTCAG;AAGGTTATGCAAGGTCCCAG;CAACTGGTAGTCCATAGTGA
OR10X1	4	2338;6718;9183;61245	2	1.42413	0.794046	0.202877	0.825033	0.824337	AGTTCCTGCGCACCTATGCA;CCTGCAGCTGACAGCCAGCG;AGCTCCCGGGAAGAGTCCGG;TGAACCGCGAGGGAGCTCCC
AKR1D1	4	510;22959;57364;69487	1	1.58795	0.793975	0.142428	0.804743	0.7989	CTTATGCTACCGCAATGACA;CTTTCGAAGCAATCGCACAA;CTCCTCAATGCGGGTCACCC;GCACCGATTCCCACTCAATG
MRPS24	4	511;43327;64941;77238	1	1.58712	0.793558	0.142686	0.804032	0.7989	GAAATAGCCAAGTTCAACAG;GGTAGATGGATGAGACATCG;TTGACCTGGGTAACTATGAG;ACTTCGTGTATTTGCCCACA
SOD2	4	4718;4846;11234;23981	2	1.68515	0.793401	0.116073	0.787564	0.783895	AGAAAAACGAGATATTGCCA;AAAGCATTGCGTACTAACCC;AGAAGCTATTACCATCTGAA;CCTGGCGAGATTATATGACG
NDUFS2	4	2379;6682;34053;39277	2	1.42836	0.793175	0.201045	0.822909	0.822154	CTCCCCAGCCACGACCACGT;TGGGGCAAGACCAAGTACAA;CCGACGACGACTTCCCCGCG;ACTCACCGAAGGTGGTACCC
SLC9A3	4	512;10449;21521;59741	1	1.58628	0.793142	0.142923	0.803927	0.7989	GGACTCCAGGTATAACACAT;GTGGTGCTTTGGCTCAATGG;AGCACCTACCTAAAATGGCT;GTTGTCATTCTGCTCATAGG
SEC23B	4	4350;5032;45733;53180	2	1.65467	0.792803	0.123718	0.78756	0.78756	TCTCCTAATCATATCTCCCA;CCAGCGCGATGTCAACTGCT;ACTGCAACGAGACAATGACT;TACAAGACACAACCTCCTGA
AMOT	4	513;47417;53680;71679	1	1.58545	0.792727	0.143189	0.803985	0.7989	CGTGGCAGCCATCCCCACAG;CCAGCTCTATGGCTATCGGA;AAGGCCTCTTTCAGCTCTAG;CCAGAAACTGATGCGCCACA
ZFPL1	4	1868;7587;48621;59445	2	1.32921	0.792186	0.250159	0.838713	0.838713	GCGGTGGGCTTCGACTACCA;ACTACTCCAAAGGATTCGGC;GACAGGTACTGTCTTCTGGT;CTGTAGGCTTTGAATACCAG
SAPCD1	4	515;11749;35971;65831	1	1.5838	0.791899	0.143692	0.803934	0.7989	TCTGCTGATTCGTTCCCAAG;AGCAGATTCTAGCATGTCCC;CAAGGGGCACTAGGGATGAG;CCAAAAGAATCCGGAAGCAC
TREML4	4	3209;5805;18429;63408	2	1.53987	0.791849	0.15788	0.805163	0.805163	ATCCAGCGTAAGAATAACAG;GGTGTATTAGGGATCATCTA;GAGCATCTCAAACACAACGA;ATAACTTGTACATGCAACCA
UCHL3	4	3114;5890;18676;28244	2	1.52827	0.791779	0.161779	0.808637	0.807553	TCTCGCGCTCGATCAGCAGT;GCTGCCCGACAACTACACGC;TATGCTCACAGCAAAGCATG;AGTTCTGCAGCACATAGGTG
CCDC15	4	516;19042;43336;57555	1	1.58297	0.791486	0.143956	0.804694	0.7989	GCTGTTAGCAAAGCTAGAGA;GCTTCTTCTGTATCGGTACG;AGCATGTGGTACTTACTGGG;CTCTTCAGTAGAGTTCGAGG
ATP5I	4	3087;5927;8145;14726	2	1.52328	0.791218	0.163534	0.809045	0.808072	ATTGGAGTAAGAGAATCCTA;AGCTTGTTTACATAATCCGC;GAGGAACATATCATTAGTGC;GGAAGACAGTATTGTTCGAA
GJB6	4	517;11018;36395;73404	1	1.58215	0.791074	0.144211	0.803972	0.7989	GAGATATTGACATAGAGTTG;ACTGGAACAGAACTGAGATG;CCTGGTTTCATAGTCCAAGG;TTTAATTTGATAGGTTACAG
ITGB7	4	2070;7231;42116;69252	2	1.36654	0.790926	0.230251	0.835739	0.833967	AAAACCCTTACAGAAAATCT;GTATCTTGGTTTCAAGCCCG;ATTTGCCAGAGCTATAAACC;AAACATTTGGTGGTCAACAT
FGFBP1	4	4188;5157;21131;61042	2	1.63485	0.790732	0.128897	0.793982	0.793007	AGACGGAGCATTCTCCTCTG;GAGGAACCAGTCACGCCCGT;GCTGCCCTAACTCGAAATGG;TGTTGCATTTCGTCACACCG
OR56B4	4	518;53602;54388;72906	1	1.58133	0.790663	0.144445	0.802428	0.7989	AGTGTGAACGTGAAGTCCCC;CTTGGGGTGAATTCCCTGCA;AGTGCCACTCGCAGGAGCCG;AGTGGCCACGGACGCTCCTA
Non-Targeting Control-TCTCTCGGAGTGGAGCAACA	1	2032	1	1.58105	0.790524	0.144493	0.801988	0.7989	GCAGCGCAGTTCAGTGACCA;CAGTGCTTGCAGACACTGCA;AGTGTGAATGTAAGGTCCCC;ACCTGCTGCGCGCCGGCTGG
AURKA	4	3010;6016;9385;31909	2	1.51142	0.790471	0.167804	0.809762	0.808072	CAGCTCTCTCAACACAGCAG;CAGCCAGGGCCCATCGCCAG;TTTGGGATGAACTCCTTGCG;ACAAGGAGCTCGAAGGACCG
MOCS3	4	2015;7347;8109;11365	2	1.35415	0.790379	0.236684	0.838265	0.83717	TCTGTCAGCACAGCAGAGAC;CAAAACGATTGGTAAACTGC;AGCCCGAAGGACCCGGGACA;GAGCTCTCACCGCTGGCGAG
ZC2HC1B	4	519;15030;46493;66117	1	1.5805	0.790252	0.144711	0.801779	0.7989	CATGACTTCCAAGCTGGCCG;TTGATAAATTTGGGGTGGAA;CAGAGCTGCAGAAATCAGGA;ATTTCTGTGTTGGCGCAGTG
CYTIP	4	3880;5352;31987;62438	2	1.60496	0.790004	0.137406	0.800111	0.798519	GCGACCCTTTCTCACTACTG;CCAGCAAGATGATGCCCAAG;TAGGTGGATAGTCCCTTGGT;TAAGGTCTTTCAAGGATTGT
MTPAP	4	3058;5984;10737;48473	2	1.51566	0.789875	0.166283	0.809886	0.808072	TCTTCTGGTAACCCATGACC;TGACATGGACTGCCTTGCAT;CATCTTTGCCAACGTCAGTG;ACACCGAGGAAATGGGCTCA
DAZ4	4	520;8297;20453;59754	1	1.57969	0.789843	0.144978	0.801845	0.7989	TTGGGGCAAGGAAACCAGCA;TGTAGTGGTTAAGGCCACCA;AACACCACCAGGTACATGCA;TGACGAGGCAATTTCCACTG
NOS1AP	4	522;35734;45125;71201	1	1.57805	0.789026	0.145481	0.803215	0.7989	GTAGAAATGGAATCCTCCAT;TCCAATAGGATGAGTACCGC;GACTTGTGTTTCATCCACAG;AGTACTGGAATGACATCCAC
OBP2A	4	2069;7288;56757;61773	2	1.36042	0.788952	0.233442	0.834308	0.834308	AAAGGGGAAAAGTTTGGTCG;GTGAGCAATGTGGACGGCGA;ACTGGGAAGGCGATGCCTGT;TACAGGACTCGTTGACATTG
Non-Targeting Control-GCCAGGGTTCTTGGTCCCGA	1	2047	1	1.57785	0.788927	0.145504	0.802638	0.7989	GCGGAATCAGAGTCGTGGGT;GACTCACTCCAGTCGCAGAG;CAGGGACACCCGTTCCCAGA;GTCCCCTTGGTCATCCACCG
MYC	4	3394;5720;14658;23723	2	1.55165	0.788746	0.153881	0.801024	0.7989	GCACCCCGGTGGATGACCAA;TGAGAATTGGGCAGATGCGG;CATCTGCGGAATCAGAGTCG;TGCCCGGCACCCCCAAATCG
RSL1D1	4	2885;6182;28350;63946	2	1.4898	0.788675	0.175805	0.809217	0.809217	GGAAGACACCCCGTCAACGA;CAACCTCAAGTACCAAAGGG;TGTAGGGCCTAAAGACCACC;AAGGCGAAAAGACCCCTTCG
EIF3C	4	3738;5475;8241;10946	2	1.58671	0.78848	0.142754	0.803694	0.7989	TTTCTTCATACTGATGGCCA;TACTTGTACATAATCTTGCA;TAATAAGCTTAGCCTCTAAG;ATGATGCTTGCAAACTAATG
SLK	4	524;9402;18965;75963	1	1.57643	0.788213	0.145984	0.803871	0.7989	TACGTTTGTAAGGTGGAACG;TCGATTTGTGTGAACAAACG;GCCAAGGCTCCGGATTCTTG;TAGGCAACTTTACTTTACTG
WDR75	4	4058;5284;13139;41378	2	1.61525	0.787992	0.134393	0.797347	0.797347	ATGCGCCCTAACTTCTGTGA;AAACGGTCAGCCCGCATGTG;CCAAGCTAGAGATTCGCTAT;AGAAGGAGGAGCGATACAAG
CACNA1H	4	3650;5547;38869;64035	2	1.57623	0.787917	0.14603	0.803423	0.7989	GCTGCCAAAAGAAGAGTAGT;GCTCTTGTTCCGACGCTCGG;GCATCTCCCGCTGATGAGCG;GGAAGTCGGACTGGCCATTG
EIF4H	4	2662;6453;31096;37839	2	1.45584	0.787705	0.189305	0.818584	0.816646	AGAAAACACCAGTAGTGCCT;CAGCCAAAGACATAAGCACC;CTGCACTCCCTCTCACGGAA;GCAAAGCCCACCTGGTTACG
MFSD9	4	527;13507;70467;73597	1	1.574	0.786999	0.146733	0.805171	0.7989	GAGGAGCTGTCTCGCTACCG;GAGCCTGGGTCCCACTATAG;CGGAGGACACATCGTAGACA;ATCCAGAGCTTTCGTGACCG
HIGD2A	4	3699;5533;15823;27516	2	1.57826	0.786951	0.145336	0.803118	0.7989	GCGGGACCTCCGAACCAAGT;AAACTGGGAATGATTGCCGG;CAGGCTGCCATCAATTCGGG;GCTACGACTGCTAGACAAGA
SDF2L1	4	528;15109;27451;34683	1	1.57319	0.786595	0.146999	0.805928	0.7989	CTGTGGGCATGATCGCGGGA;TCCCGGTCGATGAGCCGCAG;TTCCATCAATTCGAGCCGAG;TCCAGCGGGAAACTTGGGAT
ZNF581	4	4050;5317;11904;54089	2	1.61024	0.78656	0.135753	0.799378	0.798519	TCTCCAGGACTCAACATACC;TTTCTTCTATAAACCAAACC;CCGCTACCTGAGTGTACCGT;GTGTCCGGTTTGCTCTACCC
FBXL15	4	1923;7642;38485;57305	2	1.32362	0.786438	0.2532	0.841723	0.840086	TCTCACCTTTCATAAAATGG;CACCCAGACGAATTGTACGT;TACACTGACATCCGCCCCTG;CCTCCACCAAAACCATCCGG
C8orf44	4	2624;6552;30186;50343	2	1.44383	0.785562	0.194307	0.821003	0.820508	GGTGGGCGTGTGCTACACGG;AGCTATCCGTGGTCTCACCG;AAGGCCAGACTTCGACGACA;AAAACCATACCCCAACAGTG
SLC9A5	4	2250;7076;22664;28759	2	1.38344	0.785529	0.221784	0.832419	0.830415	TGCCACACCGTTGAAAAGGG;GGCTGTGTAAGAGTATCCAG;TCTTCCGCCCAAAGAGACCA;TCTTGTTTAGGCATCATCTG
RABGGTA	4	2423;6818;8207;25291	2	1.41253	0.7855	0.208097	0.828037	0.827028	GCAGATGATCCAGATCCGCG;AATCTACGAGAAAACCGTGG;CACCGACAAGTACTCCAACA;AGGGCATCGACATCTCAATG
HNRNPU	4	3030;6112;14553;29255	2	1.49883	0.785434	0.172469	0.808072	0.808072	TCGGAATCAGAATTAAAACA;CAAACCAACTCGTACTGTCG;GACTCGGCAACAGAATCTGA;TTCTCAAATACGGGACAACA
PML	4	531;28578;41625;72389	1	1.57078	0.78539	0.147727	0.807808	0.7989	CCTGAATAATAATTTCGGGG;GCACTACAAAACCTTTGAGA;AATTGGCTCCACACCCGTGG;GTTGTGACTGTGTCAAACCC
RPL11	4	3631;5618;23622;47751	2	1.56604	0.785165	0.149147	0.805755	0.7989	TGGTGGCGAGACTCAGAACG;GCTGGACAACAAAATCAATG;TAGTCGCGATAGGCCTTCCA;ATCTCTTCTCATACAACACG
TRRAP	4	2234;7114;9806;10603	2	1.37926	0.785076	0.223926	0.832007	0.832007	ACAAGACGCATCTGTTCGGG;CGTAGCATTCGAGTGCCTCG;GGGAAGCCCATAGTCCCGGG;CAGGTAAGTGATCAGAGATG
SPNS2	4	532;10168;24841;27880	1	1.56998	0.78499	0.147992	0.80785	0.7989	GAGGCGTCGTAGACTGAGAC;CTCGCACACACTGCTAGGTG;CCACTGAAGGGAACGTCCAG;AGCGCTCTCGGCGAGAACTG
NEDD8	4	2999;6156;27480;31435	2	1.49314	0.784844	0.174541	0.808731	0.808731	AGGCGTGGTATTCAGCAACG;GGAGTCAATGAAGTCCCGTG;CTTTGTCCTTATAGTCAAAG;CCCAATGAAGAGGTTCAACG
LIMK1	4	4808;4965;41461;53715	2	1.66551	0.784654	0.120929	0.784913	0.783895	GGAGATAATCGATGAGAGCA;CACTGTAACTGATATGTTTG;CAAAATACACAGTGAACACA;GTTTCTGCCTCATGACTCTG
ZNF559-ZNF177	4	533;31245;43411;61657	1	1.56918	0.784591	0.148256	0.807887	0.7989	GGTGCTGCATGGATATGAAG;CAGCTGACTTACTTGGAGCT;AGCAATCAATAAAGTCCCGA;TCAGGATTGTAAGCACCCCC
HBG2	4	534;20723;39997;51286	1	1.56838	0.784192	0.148498	0.807806	0.7989	TGTCCTTAATACCTATCTGT;AATGGACATGAACAACCCTC;GTAATTTGTTGTGAGTTCCC;AAACCCATAGTGGTGCTGCA
DCPS	4	3498;5741;10344;68974	2	1.54872	0.784011	0.154859	0.80015	0.7989	GGCGCTGGTGACCCACGGCG;CCGGATGTAGGATCATGAGC;CTTTGTCCAAGAGACCGTTG;CCAGCGCTGGGATATGCAGG
MRPL4	4	3361;5851;21535;25028	2	1.53357	0.78394	0.159971	0.806013	0.806013	AAGTGCAGGTTCCCGACGAG;CCTGCTGGGTCTCATCGATG;GAGGCCCCACGTGTGCCCGG;GGTGCTGACGGGGTTCGAGG
FABP5	4	3199;6001;37901;59021	2	1.5134	0.783421	0.167074	0.809351	0.808072	ACATCCTGAAGCCCTATGTG;GTGAAAGGCATTCCTCACAC;TTTGCACACATACCAATCCA;GCTGAAGGCACACTTCATGA
LYVE1	4	536;17161;20862;23786	1	1.5668	0.783398	0.149005	0.807069	0.7989	TGACATCCTGAAGCCATACG;TCCTCATACAGCAAAAAACC;AACACGACCAGGAGCTACAA;TTTGCACACATACCAATCCG
PSMA7	4	2251;7135;22178;44735	2	1.37696	0.783309	0.224983	0.832489	0.832259	GGGGTTGAGGAAAACACTGG;CAGGCGTCAACATCCGACGG;CCAGCAGATTCTCTTGCACA;TAGGCCGGATAATGTCAGGG
CDCA7	4	537;30737;49203;52135	1	1.566	0.783001	0.149265	0.805698	0.7989	ACAGGAAGTCAATATGCAGG;TGTCGGGGTGGCACAAACTG;CAAGAACTTACTCCTGACAA;GTTTCCCACAACCCCCAAGA
CNTFR	4	538;29138;48786;63688	1	1.56521	0.782606	0.149503	0.8056	0.7989	GGAGCAGCCGGACTCTGAGG;CTGGCCGAGTCGGCGGCCTG;GTCTCGTCCCTGCCGTCGGG;TCCGACCCACCGCGGTCGCG
AGK	4	2403;6925;14490;36250	2	1.40032	0.782515	0.213774	0.828589	0.828465	AATACCTACACACACAAACC;AGGTGGAATACACTTGATTG;CATACAAAGCATAGGTGCTG;TGTGAACATAATAGACCACA
YRDC	4	3264;5965;30793;39567	2	1.51819	0.782486	0.165332	0.80965	0.808072	AGATAATAGTCAGCCCTGAA;TCAATAATGCTCCTGGACAG;GAAACGCACAACACTCAGCA;GACCATGAACTATATTGCCT
CDC25B	4	3742;5599;72433;73189	2	1.56875	0.782363	0.148331	0.807595	0.7989	GTGGAGTAAGAGCTATACGC;TTTGATATGCAAAATACAGG;ACGGTGGCTACTCTGCCTCG;TAATCGATTCCGGTCCACAA
ZDHHC18	4	539;8632;27857;58880	1	1.56442	0.782211	0.149768	0.806334	0.7989	ACCCTCTTACGTGTATGTCC;CGACCTGCTACTCCCGCATG;TGGGCCACTTTCCAACACGG;CTGGGCAGGTATCTCACACA
MRPL28	4	3581;5722;26461;42864	2	1.55137	0.781987	0.153929	0.800607	0.7989	GAAGCAGCTGTTCATCGGGT;GCTGAGGCCACGGACGTCGG;AACGTGGCAACCAACGCTGG;CAGGCTTACCAGACACGCTG
COMMD8	4	540;16455;42207;46436	1	1.56363	0.781817	0.150003	0.805527	0.7989	GCAGGATGGACATGAAATGC;ATTGCAACATCCTTCTATCG;AAAACAAGGGAGCTACAAGT;ACTTGGATAAAAGCACTGGG
HOXC4	4	541;21195;58851;75421	1	1.56285	0.781424	0.150267	0.804199	0.7989	CATTGATGAACAACTCCCAG;CCCTCAGACAAACGGAACGG;GCAGTGCAAACATAGCCTCT;CCAGCAGTGACGTCCCACTC
MROH5	4	542;27414;55567;74349	1	1.56206	0.781031	0.150538	0.80428	0.7989	GTCCAACAGCAGATGGTCAT;CTTCCCACAAACATATCCAA;GCCAATCCGTGATCCCGAAA;GATGAAGTTTCCGCAGCTCG
RAB29	4	543;38742;54437;55885	1	1.56128	0.780639	0.150781	0.803527	0.7989	GCTGTATATACTGCTGACCG;CGGGCTTCATCTCTTGTGTG;TTATAGAACCATTACCCGCT;TGAAGGGGAAGGTCCCCACG
CIRH1A	4	4259;5316;11747;32244	2	1.61039	0.780565	0.13573	0.799992	0.798519	CAGATGATTTCGGAGGCGTA;GCTGCAGCGTGGGCAAGACG;GGCAGAAGCTGGCACCAGTG;AACCCTCAGGAAGTGATCCA
CXorf58	4	544;53388;55650;64201	1	1.5605	0.780248	0.151047	0.802223	0.7989	GGAATGGGAAAGCCCCAGGT;GGAAAAGAGTCAGTACCGGC;GGGAAACTAGAGACTAAAGC;ACCCCAGAGATGAACACAGT
TCF12	4	3834;5595;7773;33008	2	1.56933	0.779581	0.148111	0.807796	0.7989	TCATTAAGCAGATCCTGGAT;CTATGAGAACCGCACCGACG;AGTGCCGGGAGAAGAGCACG;AGACACGAAGCAGGAAACAC
SLC4A3	4	3317;5987;13567;23990	2	1.51526	0.779488	0.166473	0.808935	0.808072	CGTGAACTACGACTTCGACG;TCGCGCACAAGATCGAGGCG;GCGGCCAGTTTGCGATCGTG;CTCCTTCCTAGGCGATCCGG
IMP4	4	4949;5005;40175;61654	2	1.65902	0.779151	0.122532	0.787186	0.787186	ATCAGCGTCCCACACTACAA;AGAGCAATCCCAATTGAATG;AAGGGATGAACACACCCGTA;TTATCACAGGAAGCTATGAT
SETMAR	4	548;45744;70452;72508	1	1.55738	0.778691	0.152061	0.805565	0.7989	CATCCAGTGATGACCTGACC;CAGACGTTCTGAAACTGTGG;CATGGTAAAAAGCTGAAGCT;ACAGGATTCGGCGTGATTTG
CD209	4	3722;5694;29117;49855	2	1.55529	0.778533	0.152658	0.804656	0.7989	TCTCTGCCTTTACTTCTCTG;TGTCAGGTGCCTCTAAGCAG;GGCCTTCGAGGAGCTCCATG;AAATGCCAGAAGAACTCACC
BTNL9	4	549;70548;71631;75567	1	1.55661	0.778304	0.152299	0.806146	0.7989	AGTAGAACTTATTGACCTTG;GGAAGTGAATGTGGACACAC;CTGCGACTCGAGATGCAGAT;GGGCATACCAGACGACTGGG
TEX12	4	550;27717;50329;55230	1	1.55583	0.777917	0.152562	0.805502	0.7989	AGGGCCGGGTTCGTGCGGCT;TGGGGGTTAGAACTCACAGC;AGGGCTGGGTGTGTCCCGAG;ACGTACTCCACATCGCCGAA
MCTP2	4	551;24529;46726;54220	1	1.55506	0.777531	0.152805	0.804756	0.7989	GTGACGATACTTGGGCGGCA;GCTGGTGTGGTAAAATACCG;GCTGTTACACTAAAGTTACA;AGGCGGCAAACTTCACATGA
RARS	4	2739;6622;33418;65338	2	1.43545	0.77723	0.197864	0.82058	0.820508	ACCAAGTTGGACTTACAGAG;CCTATATGTTCAATGACCTG;CCAAGCAATTGACTCCATCA;ATTACATACAATATTAGGAA
GUCY1A2	4	552;14593;37570;76177	1	1.55429	0.777146	0.153068	0.804122	0.7989	GCAGCATGAAGCCATGCCGT;CGTGTCCCTCAAGAACATTG;TGCTGACGTAGATGTCACGG;TGTACCTGACCGTATGCGAG
TUBB4B	4	2548;6867;8982;11246	2	1.40691	0.77707	0.210739	0.827028	0.827028	TTGCAGTGCTCCATTTAGAG;TGCCAGGCAAGACTCTCAAG;CAGTTTAGCATGATACAACC;AAAAGGTGGGACTCCACAAG
ECI2	4	4695;5165;20046;62329	2	1.6336	0.776788	0.129314	0.793439	0.793007	GGTTTCTGAGCACGTACACG;GGGAGTAACTGGTGACGTTG;TCGGTCGCTCGCCAAAGAGG;AGCCGTACTAGCAAACTGCT
FAM19A3	4	553;32521;41823;70944	1	1.55352	0.776761	0.153311	0.804049	0.7989	GTAGCTTCCCAGGAATGCGT;TGTTGGTATTCGCCAGTATG;TACTGAAAGAGTGATACGCG;CCTTCCGATTAGGGACGTAG
PTCD2	4	554;40934;70163;71681	1	1.55276	0.776378	0.153566	0.803375	0.7989	GGGACATTCGAAAACCTCAG;TGTGCCATAGCAGAACCCGG;GGAGGATAGTACTCTCACTG;TCCACCAACACCCACGTGTG
MTHFD1	4	2637;6769;14813;18382	2	1.41819	0.776376	0.205579	0.827454	0.826551	GACAGCTTCAGACTAAATGG;GAGGGCACGCACAGCCAGTG;CTATTTACCCCATAGAGGGA;GGTAACTGGCCATTACTATG
EPO	4	4229;5423;25206;73611	2	1.59437	0.77607	0.140471	0.805271	0.7989	TGACTAGTGTGCCAAATGAG;GTCAGTACTAGTACGAGATG;GGATATTCTAATCTCATCCG;TTTGCAAGAATCCGTCCTCG
ZNF385A	4	555;55963;75275;75650	1	1.55199	0.775995	0.153808	0.801973	0.7989	TTCCTGAACCTGTTGCCAGA;TGTATGAGAAACCTGAACGA;TCAAGAAAATCTCCATCGAA;TTTGAGCTTGCCATTCAGAG
RPS10	4	2534;6918;9901;74294	2	1.40111	0.775853	0.213348	0.828983	0.828465	CATCTAGCAAGAAATCATCC;CTACAGAGCTCTCAGCATGG;ATAACAGAACGATATAAAGT;AAAAGATCGGAACCGGTCTG
ATP8B4	4	3774;5718;27130;58141	2	1.55193	0.77571	0.153832	0.801433	0.7989	TCCAGAATACTTAACAGCTG;TCTTCTTCCAATGTAAACGG;TAGATAGTGCGGACACCCTG;TTTATTCAGAAGGATCCGCA
CCDC74B	4	556;32736;43039;60710	1	1.55122	0.775612	0.154068	0.80067	0.7989	TGGTGCCCATTGTAAGTCGG;AAGGATAGCAATCGTAGGGT;GGTGTGTATCGAAAATCACC;CCGAGGACTCAATACCACCC
TARS	4	3332;6067;11140;50385	2	1.5047	0.775403	0.170265	0.81105	0.808072	TGCAGATGTAAAGACGACCG;GGAGAAGACGCCATTTCAGG;ATGAGGACAAAACCATCAGA;GAATATTACTTTACCCCACC
SF3B4	4	2850;6549;14815;36808	2	1.44419	0.775036	0.19411	0.820721	0.820508	GACCGCCGAAGTGCTACAGA;ACGGTTAGAGACACCAACAC;CATCGGCGATGTGTGCAACT;GCACTGAGCGGTAGCACTGT
EIF3D	4	4662;5216;8157;8292	2	1.62568	0.774972	0.131407	0.793112	0.793112	AGTCGCCAGTCAGTGTTGTG;GAATGACTGTATTATCCGAG;GTTCTTCCCAACATGAACAT;CTTTATTGAGGAAGATTGTG
DTD2	4	558;29378;31718;60731	1	1.5497	0.774849	0.154545	0.801159	0.7989	GGCCAATAGTGATTGGCGAA;AGAAATGTAATATTGACAAG;TTAGGGTGGATCACTGTCCG;TCTACACATACAACTGCTCC
RAB15	4	2808;6609;9229;66465	2	1.437	0.774545	0.197279	0.821409	0.820508	GCATTGACGGAATCTGTGCA;GGAGTCCAAGTCCAATGCCG;TTGACGAGGATATCTCCACC;GCAGCACTCGAAATTCTGTG
DPF3	4	559;20127;38101;54512	1	1.54894	0.774469	0.15481	0.800552	0.7989	ACACCTGGATGACCGCACGC;GGCAGGTATAGGGCGCGGCA;GGCACTCACAGTAGACGCTA;GAACCCGTGTGCGTGGACCT
PRPF40B	4	2979;6436;43866;53101	2	1.45792	0.773957	0.188373	0.81963	0.816646	TCAGACGGGTACTCGCGGGT;GCTGATGCAGGTAGCGCAGG;ACTCACCGAGGCTTTGCACA;GCGCTACCTGCATCAGCAAT
PUS7L	4	561;36518;42672;71234	1	1.54742	0.77371	0.15532	0.799897	0.7989	GGCCCTCATCACCCGACCCG;CGGGCGCTACCCGAGTCGCT;TCCAAAAGGACAAATCAACG;GACCCAATTGCGATCAGGTT
GPS2	4	4169;5508;12004;26809	2	1.58189	0.773622	0.144256	0.80351	0.7989	GGGACCCGAGACTGGCACAG;GGGACACGGCCCTAATCACG;AGAGGCCTACGAAAAACTCC;CAAAGCTCAAAGGGAGCACG
PSMC4	4	2551;6957;13512;44114	2	1.39671	0.773516	0.215497	0.830144	0.829462	GGATAGCCATCTGAATTGAG;TCGTGTCTTGGACTTCAATG;CTACCAACCTGCGATCACCA;CATTGTCGATATGTGCGTGG
Non-Targeting Control-ACGCTGACGAGTAAAAGCGG	1	2199	1	1.54675	0.773373	0.155441	0.799868	0.7989	GATAAAATACCAGTAATGCG;AGTGGTACCAGACTTCATAG;TCGCTGCGCTACTACAGCGA;GCTTCTGCCAGAGTACGACG
FUT11	4	562;22746;23068;45657	1	1.54666	0.773332	0.155561	0.799829	0.7989	CGGGCAACGACACCCCATCC;TGAGCGCGGCGGCCGATCTG;CTGGCCTACAGCGAGCCGTG;CACACAAGTGTTCATCCTCA
USP45	4	564;11146;34120;36965	1	1.54516	0.772578	0.156085	0.800556	0.800556	ACACAACCTCGCAAGCCGCA;CACCCAGAGAGCCTGCTAAG;TCCTGAACCCAACCTCAACG;AACTAAACTTGGTTGCTCAA
DRGX	4	2629;6885;23136;66360	2	1.40486	0.772325	0.211598	0.828846	0.828369	AGCACGGATTGCAGTTGTCG;TTGACCACGATGTCAAAGGA;ATGATGGTAACGGAGCATCG;CCTGACCAAACACATACTGG
KCNQ1	4	4881;5168;9285;49240	2	1.63314	0.77212	0.129377	0.793047	0.793007	GGGGGTAGAAGCGAACCAGT;ACCTATGACGGACATACCGT;ACTTACGCCCGTCCCCCTCG;CCCATGCGCCACAACCTAGG
Non-Targeting Control-GAAAACACGATGACGTCTCT	1	2213	1	1.54399	0.771995	0.156426	0.801651	0.801651	GTAATTGATCTTGTACATGG;AAGTTGATGACAGCAACACT;CCGTGACAAACCGAGCACTG;GGGCTAGGCCAATTGACCGA
NKRF	4	567;9787;20615;58938	1	1.5429	0.771451	0.156836	0.802442	0.802442	CCGCCAACCGAGTGCCCGCG;TTACGTCCGCAGGTTTGCCC;GGTGGACCCGCTCAGCGCCA;AGCGCGTGAACGTGACGGTA
RTCB	4	3614;5929;36129;47514	2	1.52301	0.771401	0.163703	0.808608	0.808072	TCTCCACTGATGCACATCCA;GTCCTGCAGCCGGATGCCCG;GCTTATCAACGACCGCTGTG;TCTGTCTTCTTCCTGCGAAG
MRPS2	4	2192;7575;13448;28380	2	1.33044	0.771306	0.249453	0.838583	0.838583	GATTACACCCAGATCAACGT;GGTCTGGTGACGACCGATGG;CTTTCCAAGTCTCGAATCTG;GCTGTGATGATCTGACTCGA
TUBA8	4	568;19541;40012;53147	1	1.54215	0.771077	0.157106	0.803173	0.802893	TGATAAAGCGAATGCAACAG;AAACAAAAGCCCATGAATGT;CTGATCGTATCTTGGATGTG;GCCACCCATTATCAAGCCAT
BNIPL	4	569;21589;45433;51750	1	1.54141	0.770704	0.157351	0.803118	0.803118	CGGGAAGGACTTAATTGCAC;GATGTCATCCGAGTATATAG;CAACATTAAATACCCAATGA;CATCACAAAAAAGCTGTCAG
OLA1	4	2328;7371;13732;75722	2	1.35162	0.770437	0.238069	0.837975	0.83717	GGAATTGACAGATTACCAGT;CATGGTTTGTGATGATCCGG;TGAGACTAGATCACCAGGCA;CAACCACAATCTCAGGACGA
RRP12	4	3960;5717;9117;23392	2	1.55207	0.76989	0.153692	0.80203	0.7989	CGGATCCGGCCTAATCGTGA;GCAACTTGTCACAGACGCAG;TGATGAGTAGTCAGTCTCCG;CTTAATCGGAACCATAGGCG
PRR34	4	3587;5986;11228;40571	2	1.51539	0.769788	0.166331	0.809493	0.808072	GGCGGCCGCGAAGTAGTGAG;AGGGAGGCCACGGCATGCGT;GTAGGAGCCACATTTCCCGA;TTCCAGCCTTGAGAGGCTAG
PPIAL4E	4	573;8072;19611;52999	1	1.53843	0.769216	0.158372	0.806364	0.806013	TCTCGTTGGCACGAGCACCA;GTTGTCGAAGAGCGAACCGT;AGGTACTTACTAAATGTGGG;CTTCATCCTTCAGAAATGCA
KIAA0895	4	4525;5400;39007;57394	2	1.59779	0.769174	0.139466	0.803915	0.7989	TCTCGGTTCCTTAAATGAGG;TAGCACTAAACATCATAGTG;CGTGGACGGAGTGATTACGA;GCACCACCATAAACCACGCA
CCNI2	4	2481;7178;71178;74959	2	1.37227	0.768994	0.227397	0.834542	0.832843	CTATACCCTACTCACTCCCA;CCTGATCGACCCTATTCGAG;AGTGATTGTGTGTCCTACCA;TCTACAAAATTGGATCTAAG
SLC2A14	4	3290;6255;39808;73603	2	1.48049	0.768922	0.17936	0.813074	0.81249	GACATGTTAGCCGCTAACAG;CCAAAGCCTCCATAGCTCTG;TTAGACACATCATGGATCAG;CCTCCATGAAGAGACATGCA
RAP2C	4	574;50298;55881;71958	1	1.53769	0.768846	0.158619	0.806964	0.806013	ATTCATTTAGAATATAAACC;TCCTCTATTGGAGTGCAGAG;TAGGGCAAACAAACGCTGCG;AACTAAAACATTTAAAGACC
OR51D1	4	5068;5148;18438;25618	2	1.63626	0.76884	0.128575	0.792774	0.792774	CCGGAGTGTGTCGGTCAGCG;GATCCTGATCGCAACAGACG;AGCCCAAGCAGTCTCGACCT;ACGTGGTCATCGCCACGCCG
Non-Targeting Control-AGCTGGACTCTGTAGAAATC	1	2247	1	1.53737	0.768684	0.158693	0.806691	0.806013	CATTCCTAGAGAGAGGCGAT;AAGTCTACTTGTATCTACGG;CTGATAGGCAAACTCTAATG;CCCACTGCTATTCAAGCTCA
LOC113230	4	575;27845;52829;67684	1	1.53695	0.768477	0.158892	0.807047	0.806013	ACGTCAGGGATGTCCTCGAT;CTGCCTCGCAGAAAGCAACG;GTAACCAGGGAGACTCTCAG;TTGACAGCATGCATCAGTCC
PIGM	4	4967;5203;10270;38109	2	1.62769	0.768292	0.130877	0.79449	0.793112	TGGCTGGCAAGTTCTCGTGT;TTATTAAAGCAAGATCCCCC;AAACACAAAATTCACGTCCA;TCAGTGTGTCCATTGGAGCA
ARL2	4	2456;7235;13910;39013	2	1.36611	0.76826	0.230482	0.836096	0.833967	TCTTTGTTTCGCATGAACAG;GCTGGCCATTCAAATAGACG;TCATAAGCAGGAGAAACACC;GCGACCGCAGCGATGCACGA
TDRD12	4	2798;6783;17854;61087	2	1.41657	0.768192	0.206318	0.826721	0.826551	TCTCAACAATCTGTTCCACT;CATCTTAAAAAATTCCCACA;TGCATGCTCACTGATAATGA;GGAACAAGTTCAGTGAACTG
BAHD1	4	3747;5903;31817;34352	2	1.52651	0.768119	0.162462	0.807553	0.807553	GCTGAAGGAGAGCGACGACG;TGTTGTTCGAACATCAATGG;CTGTTGTTAGTGCAGCACAT;TCAACCACAAAAGATGACGT
CAPNS1	4	576;8022;32712;57881	1	1.53622	0.768108	0.159138	0.807645	0.806013	AGGTCGTGATCTGTCCCGAG;AAGGCACAAAAAGCCTGACT;ACTCTGTACAAGAACAGGCT;GAAAAGAAGCATTCGCTACG
MTIF2	4	2909;6665;22344;40612	2	1.43036	0.767804	0.200101	0.823338	0.822154	AGTGGTTGTTTCCCTTGCAT;CAACCTCATCAGCTCTTGCC;TGCCTGGAGTGGCTCAGCCT;ATGTCCGCTGCAATCTGCTC
RPA2	4	3563;6054;17824;21850	2	1.50641	0.767624	0.169588	0.810281	0.808072	AGATTGATGTCTCCTACCTG;TTCCTGGAGTGACTCAGCCT;TACAACCCAGAAGCAGTCTG;TTCCTGCAAAGGAGATAGCA
SLC25A18	4	3233;6342;46191;51533	2	1.46955	0.767473	0.183768	0.816558	0.815941	AAATATTATTGCAGAGTCAG;GGCAGCTGAGCACAGCACAC;CTGGAACAGGCACCAAAAAC;TTTGTCATTGCAGGTCATGG
GALNT14	4	578;14460;57851;65084	1	1.53474	0.767372	0.159642	0.807593	0.806013	GTGCTCTTCTTTCTGACCCC;TGGGGTCAGAAAGAAGAGCA;GGGACATGCAAGAACAATTG;AGAAATGCAACAAACTTAAA
CCDC146	4	579;9637;61544;63283	1	1.53401	0.767005	0.159877	0.80748	0.806013	TGCTCTATGAATTGCTGTCC;AGCACTAATTAGTAAGAGAA;CTAATTAGTAAGAGAATGGA;TACTTCAAAGGTAAGACATT
YAP1	4	3366;6235;24924;31274	2	1.48303	0.766907	0.178482	0.812611	0.812136	TATTTAAACATCTCCCAACA;AGAAGAAAATGGCGAAGAGG;CCTCTTCTTCATGTAGCCAG;TTCAAGGCAAAAGTCCCGAC
DTX2	4	580;50461;57693;58835	1	1.53328	0.766639	0.16014	0.806218	0.806032	CAAGCCGGAATGCAACAGCT;TGTTCGTGGTGCTTGCAAGC;ACTGTGTCTTGTGGTCCATC;ACAAGACACAGTGAAGACAA
FAM179A	4	581;12277;48829;61801	1	1.53255	0.766273	0.160387	0.806814	0.806032	AATCATGCAAAGAAATTGAG;AGAGTTTAATGTCTCCTGAG;AGACATTAAACTCTCTGTCC;CCTGGCCTTAGTTGTCCTTG
MRPL37	4	2229;7660;22615;31302	2	1.3218	0.766218	0.254199	0.841039	0.840086	ATACTGTTGCCTCAATATCA;CCAGCACTTCTTAAGTTGTT;CAGAGTAAATGAAGTGCCTG;TGCTGGAATAACTATGTACA
DST	4	582;9383;30598;65250	1	1.53182	0.765908	0.160636	0.80613	0.806124	CTGCTGTTTGAGGTACTCAC;ATGAAATAGGATGTCTAAGT;AAATGCTTCAATAAAGTAAC;CTATTGCAGGAAGAAATGCA
ZKSCAN5	4	5131;5184;63577;76865	2	1.63064	0.765556	0.130088	0.795081	0.793112	TCTCATGATAAAGCAACTAT;TTCTGGTCCCCATTGCCACC;TATAGTTGCTTTATCATGAG;GCAACTATAGGTGTCTTTCA
RNF168	4	583;30096;40823;65492	1	1.53109	0.765544	0.160906	0.806198	0.806198	TCTCACCTGGAAGAGGCATC;GAGGCATCAGGAATATGAAG;ATATTCCTGATGCCTCTTCC;GCTCCCAGCCATCAGCCATG
SHROOM2	4	2983;6646;20334;72239	2	1.43261	0.765348	0.199103	0.82192	0.82192	CAGGAGCAGAGAGTTATCGG;ATTTATCAGAACTAAACCGT;CGGGAATAGGACCTATGGCG;GGACCTCGACACCCAGTCGG
COL23A1	4	4015;5780;14985;69106	2	1.54331	0.7653	0.156669	0.802244	0.802244	CTTACCTGAACTAAAATCCG;TACTCCCACTAATATTTGCG;CGCATTCTTATGCAACTCTG;AAACCGTAATCTTAGTGGAG
SMIM6	4	2439;7350;19680;64540	2	1.35383	0.765076	0.236889	0.838522	0.83717	TGCCAAGGGTGTTGTATGAG;GTTCCTACTGACAGACTACG;TGTCTTTATCACACCTCCCG;AGCTGCTAGTCCACTCGCTG
APOC4	4	585;50755;54589;66965	1	1.52963	0.764817	0.161384	0.807949	0.807553	GTTATACAAATCCACCACAG;TGGCCTAGCAGTACCCGCAG;CACTCAATAGTAGCTCCCAT;TTAGGTACGTCATCAACCAC
CCDC144NL	4	3177;6461;27303;69919	2	1.45486	0.764778	0.189639	0.818341	0.816646	CGTAGAACTCCTAAAAGGCA;AAGCTTTCTACGATTTGGTG;AACAGACTATCCAACTGTTG;ATGGCCAATACAAGTAAACG
LCNL1	4	3384;6275;43304;71475	2	1.47796	0.764552	0.18036	0.813498	0.81336	TTGAAGCAGCCTATGTACTT;CGACAGCGATGTTTCCGTAA;GAATGGAATGATCTCCCACC;TCACAGTATTGCAATTGGAG
RPS10-NUDT3	4	2366;7481;45773;73414	2	1.34011	0.764479	0.244144	0.840985	0.838583	CTGACAAGTCTACGGAACCT;AAACCTGTAGAGACTAATGT;CAAGCTACTCAGCTATGGGA;TGACATCTCTTGTCTTAAAG
PROSER3	4	586;56582;57301;61289	1	1.52891	0.764455	0.161652	0.808646	0.807553	AGTTCAGAATGAACTTCCGG;TGGTAGATTTCCGATTGTCA;GACCGGGGCATTATTCACCA;AGGAAGGTGAGGCCACCACG
TMCO3	4	3459;6216;32481;38663	2	1.48545	0.764314	0.177514	0.811143	0.811143	GCGGGAAGGATACGGTCATA;AGAAGTTGACCCTCACCCGA;GGTTGAAGTAGAGTTGAAAG;AAGAAGAAGCTGAATCCCAG
MST1L	4	4118;5739;16522;38436	2	1.549	0.764138	0.154695	0.800617	0.7989	GCGCGACACCTGGTACACGC;TAGAGCTCGGCCACTCGCGT;AGAAATGTTCTTAGCCGCGA;CAGAATTGAATCTCTCAACG
GAS7	4	587;20819;44859;66539	1	1.52819	0.764093	0.161899	0.808593	0.807553	TCTCAACATCCTACACGACG;GCTGCTCTTCGACCAATACA;GGATGAACCCGTGTCACTGT;TACCTGGATGAGTACCGTGG
CRYBG3	4	589;15459;72276;75583	1	1.52674	0.763372	0.162412	0.807945	0.807553	AACCATATTGTAAATGACGT;TACTCAAAGAAATTACTACA;AGACAGTGAGCACTGTCGTG;TATGGATGAACAGAATCCCA
PDZD3	4	590;49565;58102;71729	1	1.52602	0.763012	0.162658	0.807887	0.807611	AGAAAGCGCTTCCGGATGCG;GGCACCATGAGTTGACGTCG;CTCACCAATAACCAGGCATG;CACACCAGTTCAGGATGCCA
ADAM21	4	591;29059;29691;59459	1	1.5253	0.762652	0.162898	0.807803	0.807803	TCTCCCCGCTCAGGTAGACC;ACAGCCTCCTTCCCATGATG;GGTTCTACTTCACCCCTAAG;GGGCTGCCAACAGTACCGCA
CFHR3	4	4887;5351;50611;56015	2	1.60511	0.762637	0.137259	0.80074	0.798519	GTGTGCAAAGATGAATCCGT;GCTGCCAACATACCTCGTAG;AGACAAGGGATGCTACTCAG;ATAGAGTCAGGCTCATCCAG
CHPF	4	4200;5725;36376;70053	2	1.55095	0.76242	0.154118	0.800268	0.7989	TCTTCCGCAAGAGCAAGCAC;GTTGGCCAGGATTATTAATG;CTACAACTTAAGAAAACCCA;CTATCCAATACATTGGGTTG
C1QTNF9B	4	592;14062;23542;26886	1	1.52459	0.762294	0.163169	0.808509	0.808072	CTACAGAACCTGTAGCAACA;AGGAGGAAACGCCCTCGAGT;AGTGGCATATCTATCAGGAC;GCTATTTGCATTGCAGCTGT
SDCBP2	4	2777;6964;71910;74765	2	1.39592	0.762278	0.215818	0.829854	0.829462	CGGCCCGGCAGATACCTGAG;GTCGCTGTGTCCCAGAACAT;GACATGGTCTGGATAGTTGG;AACCTTAGGGAACCTCCACA
DDR2	4	2837;6902;45815;57815	2	1.40292	0.761867	0.212539	0.829432	0.828463	GACCACAACTTCTTCAGTAG;GAACTCAAGGAACCTCCACA;GTCGCTGTGTCCCAAAACAT;AGAATCTGGTGATTATGGGT
PABPC4L	4	3688;6090;18395;65527	2	1.5017	0.761797	0.171316	0.809917	0.808072	CAGGATTCACTCCACTACGA;AGGAAGAGCAGCACCGGCGT;CCGCAACCACGTCCACGTGT;GAAATGCAACTGTGCGCCTG
ASIC5	4	594;17874;41656;68312	1	1.52316	0.761578	0.163651	0.808984	0.808072	GTGACTCCAAAACCTCAGGA;CATCTTATAAAGTCCGTCCA;ATCTCCCGTGGCCATCAGGT;GAGTCTTGAAATCTGGCCCG
NCAPH	4	4605;5515;18126;68233	2	1.58087	0.761475	0.14454	0.801539	0.7989	TAAGTGCGGGACTAAACACA;GTGCGCGGTAATTCACACCG;TGGGCGAGTTTAGCCTCAGG;GTGCTGCACAAGGTAGCGAA
SMIM11	4	2582;7246;28956;68052	2	1.36492	0.761353	0.231152	0.83563	0.833967	CAGCTTTGCCCACACCATAG;GCGGCCAGTGATGTAAACTG;GCCACGGCCAATACCCCTGG;TGGGATGATATCAACAACGT
HSPD1	4	3016;6715;13446;21683	2	1.42448	0.761239	0.20279	0.825213	0.824337	TGCATAGCAGGTGACGCCAG;TGGATGAGGATGTCCAACCG;GGCATGTGCCCCTAGCCGCG;CACCCGTGACCACGGCCGTG
FXR2	4	596;42720;46679;61118	1	1.52173	0.760865	0.16417	0.809006	0.808072	CGGTGACCACCCTCGCACTG;GAAGAAACCTTGAACGACAA;CTCCCGTCACTATAGCGACA;ATTTCGGCCTGAACTACCTA
IRF2	4	2563;7295;31954;73299	2	1.35968	0.760563	0.233868	0.835356	0.835356	TGGGTCTGGTAAAACAACAC;TCATAGTATCGAGGAGTATG;CGCCCAGGAATAGTTAGGAG;TTACACCATAACGCTCCAGG
GCGR	4	597;25834;44603;52769	1	1.52102	0.76051	0.164411	0.809556	0.808072	CTCGAAATGGGAACACCGGG;TGTTTCGAATCCCCGGACGC;TCCCATCTGTCATGTAGCGG;CAATCGCTACCACATGCCCA
GADD45GIP1	4	4503;5590;10469;17904	2	1.57004	0.760501	0.147874	0.807906	0.7989	AATCCAGAGAGTATTCGACC;GGTGCTCATGAGTGCCACAG;GCAGAACCAGATCAGTCACA;CCTGTGATAGGGTCACTCAG
CPSF2	4	4295;5716;24625;44726	2	1.55221	0.760165	0.153666	0.802562	0.7989	GGGCGACTGGACGCTAAGTG;TAACGTGGGTCGTAAGTGCG;GATGCTCCTCTATGCCCCGG;CCCCGTCCCAGAAATTCGGA
PCDHGB3	4	598;9046;42507;68709	1	1.52031	0.760155	0.164687	0.809645	0.808072	CGAAGAACAAGTAATCATGG;GTATGAAGGAAACGTGACAG;TCTTTAAGCCTCCACCGGAG;GGACGACGATCAGAAAGACT
PACRGL	4	3629;6177;40514;70192	2	1.49044	0.760031	0.175561	0.809873	0.809217	ATCGAGACTATGACCGCAAG;CCCACAGGAGGATTACGTGG;CCGATGACAGAAGACACTTG;TCAGCGGAGACAGATCAATG
FGF3	4	3549;6247;25482;26399	2	1.4815	0.759809	0.179033	0.812175	0.812175	TAGACGGCGAAATCTTGTCG;CCCAGGTCGAACATATCCAG;TGATGATCGCGTACTGAGTG;TAGATGGCGGGATAAGCATG
CDC20	4	2603;7261;39383;55632	2	1.36331	0.759765	0.231948	0.834666	0.833967	TGGATGTGGGAAAACCACAC;TCAATCACAGCATCCAAAGG;GGAGATTTACCAACAACCAT;CAAAACATTATACTGGCATG
MTIF3	4	4269;5743;28858;75653	2	1.54844	0.759635	0.154909	0.79975	0.7989	GTGTTGAGGCCTGACGATGG;TTCAACGTGGAGCTTACCAG;GCAGTTAGTCCCAAAATGCG;TCAGCTACATAAAATCGATG
GPALPP1	4	601;25918;68823;72743	1	1.51819	0.759094	0.165449	0.809592	0.808072	AGAATATGGATCAGATCCCG;AGTAAAACGGGGCATAGAGT;TGGTGGTAGCGATGTCAGTG;GGGACCTGTTCTACCCGGAA
INTS10	4	2511;7422;22851;43282	2	1.34626	0.758756	0.240872	0.839843	0.838583	AACAGCATTATCGATAAGGT;CAGGACTCATGTTCAACACG;TTGCTTGTGAACTTGACCCA;CTTCAGACCACCGCCCAAGG
LEPROT	4	603;15609;47277;62608	1	1.51678	0.758389	0.165942	0.810739	0.808072	AGGTTGGTATCCAGTTGTCG;AGAGGACACGACTGAGCTAG;CATACCCGTCTTCTCGCCCA;AACATTTGGGAGTTTATGCA
CSN2	4	3417;6394;51508;64367	2	1.4631	0.758386	0.186309	0.816306	0.816306	CCTGGGGATTACCGTAAGTG;AGTGGCGTGTGTGAAATCGA;CATCGAGGTCTGCACGACCA;CATGCATGGACTGACCTATG
RPS24	4	4312;5757;12232;25827	2	1.5465	0.757791	0.155611	0.799429	0.7989	GCAGCTGATCACCTGCCGGT;CAGCGCCTGTCCATCTCCAA;TGCACGATGAGCTTGTAGAT;CTTGTTGCCCACGAGCATCA
RPSA	4	3195;6630;10743;18636	2	1.4345	0.757279	0.19831	0.821345	0.820999	TCGGATGCGTTTATATACGG;GATATTACCACTAGTCTCCG;GTGTTCCTTAAAATGTGACG;ATTTGTAGTGTAGACCCACC
HS3ST3B1	4	2715;7181;27658;57952	2	1.37195	0.757195	0.22749	0.833908	0.832843	AATACTAACAGAGTATGGCG;TGGATAAAGTGGCTGCCGAG;GGTCGTGAAACTGCTTCCCG;TTCCCCAGAGCATAGCAGCG
KPNA6	4	2657;7273;15477;47704	2	1.36203	0.756678	0.232651	0.83433	0.834171	CCTCGGCTCCATTCTCAGTG;ACTGCCTGCTGAGAAACCGG;GACCTCTGTGAGAGGAACCT;AGGACCCGCGATGTCTCTCT
DCST2	4	609;39652;55136;56373	1	1.51258	0.75629	0.16746	0.809971	0.808072	CACACATAATGTCCGAATGT;GATTCGACGGATACTTCGGG;TCGATATGAGGACGGCATTG;CATCATGCATTGTCACCATG
CXCL9	4	4948;5452;21954;25672	2	1.59009	0.756198	0.141744	0.804497	0.7989	CTTATCACTGCTACAAGGGT;CATGGTTTGAGTAATGACCG;GGCAGCACATGCCATCTCGG;TACCAAGGACTGGCATTCGG
OR4N4	4	4704;5575;13055;60855	2	1.5722	0.756095	0.147276	0.806746	0.7989	GAGATGCCATGTGCTGCCCT;CTCAGATGTTTGTACTACGA;CAAGATGGCACACATGCAGA;CGTTCTGTGCTACATGTCGT
C2orf74	4	610;12296;42327;49753	1	1.51188	0.755942	0.167702	0.810515	0.808072	AATGTGTAACACCACTGGCG;AGATGAGTTAGACCACACTG;CACTAATATAGCATGTCCCG;CCTCGGCTGAGTACAAGTTG
PPP1R9B	4	4468;5709;59857;60784	2	1.55319	0.755804	0.153379	0.803067	0.7989	AGTCCGATCATAATCAAACA;TGGACAAGACTACCACTTTG;TGTCATATGAGCCAGTGACA;GGGGATGATTGAGTCTAACA
KBTBD8	4	611;13980;44741;53418	1	1.51119	0.755595	0.167951	0.809851	0.808072	TGGACAGGGTACACCCCACG;GGTGGCTATGGTAGTCGTGG;GCTCTGGATGGTCCTAACGG;TAGGACTACTCACTTGAGTG
SPINK5	4	612;26009;32650;75065	1	1.5105	0.755248	0.168196	0.81041	0.808072	GATGTTCGAGCAATCCGACC;GATGATTGTGAATATAAACG;CAGAGAGAGAAAGCTAAACG;CAAACAGTTAGAGGACCCAA
KIAA0391	4	2598;7401;13310;21684	2	1.34846	0.755064	0.239675	0.839397	0.838583	TGGAGCCTTGGAAACCGGGT;GCAGCCCGTAGAACCCACGC;GCCTCACATTCGTCCTCGAG;TCCAGGTCGTGCTCGCAGCG
NPIPB6	4	5276;5334;10162;19262	2	1.60767	0.754737	0.136504	0.800053	0.798519	TTCACACTCAGGAAAACTGG;TTGTGAGATTGAAACTGACA;AAGGTCTGCGTTCAGAACAT;GACAGATTCTGCAAACGCTG
CLEC6A	4	614;21689;22413;38599	1	1.50911	0.754557	0.168698	0.810346	0.808072	AGACGGATGGTGCATAGCTG;TGTTTGTGTCAATCCCAGCG;CAAAGAAAGTTCGTAAACCC;CTGACTACTACAGCCCTACG
THOC3	4	4978;5478;10761;57369	2	1.58627	0.75423	0.142948	0.803348	0.7989	GGACATTATCAACCCGGACA;CATGGATAACAACAAAACGC;GAAGCTACCCCAGAAAAAGG;ATGCTGGGCACGAACGACGG
SELENBP1	4	616;26792;49514;61443	1	1.50774	0.753868	0.169182	0.810189	0.808072	TCTCACGCATCACCACATCT;GCTGAGCCGTGAACGCTGTG;CTGACTGCTCAGACAGACTC;GGAGGCTGAGGGCTCCCATG
DHX34	4	617;14472;15047;39860	1	1.50705	0.753524	0.169456	0.810886	0.808072	ATTTCCAGTAAGTTACTAGG;TGTCCCTAAGGCGATCTGGA;AGAGCTCTATGCAATGTCAA;CAGCTTTCTCATACCCTCTG
RHPN1	4	3749;6236;23628;62649	2	1.4829	0.753516	0.178507	0.812136	0.812136	ATCACGGTCAGTCTAGCACA;TAGTCGGTGACACTAAGTTG;ACTGAATGACATACGCCCAA;AAATGTACAAGGACCGACAA
ANKRD20A1	4	4220;5909;11359;13853	2	1.5257	0.753436	0.162731	0.807611	0.807611	CATGGTTAAATCAAGGCAGG;CAGCGGAGACTTATGTAGGA;AGAGTTGGAGAACATTATGC;AGAGGAGGGTGTCGCTAATG
NUPR1	4	618;14630;31250;58385	1	1.50636	0.753181	0.169706	0.810229	0.808072	GGGGGAACCTGCATCCCCGA;CCCCGGATGCCCGACCACCG;GCTGGAAAACTTCGAAAGCG;CCACACCATGGTTACGACAG
IFRD2	4	3260;6685;36786;65704	2	1.428	0.752577	0.201127	0.822707	0.822154	GGGCAGCCGAGAAGTACCCG;GCCCGGGACGTCGTCCCCAG;CCTGCGCCGCCATGACACGC;TGAACCGAAGACCTCGTAGG
MRPS34	4	3709;6291;14834;17797	2	1.47594	0.752514	0.181244	0.813979	0.81336	GCGGCCTCCGCCCCAAAAGG;GTCTCCGGAGGGAGTCCCCG;GTGCCCGTCAAGGGACACGC;TTACCAAAGTCGGTGAACAG
KIAA1210	4	621;18558;57198;67892	1	1.50431	0.752155	0.170463	0.810766	0.808072	TGTAGATGTTGGAATCTGGG;AGGAGGGAATAAGTGAAGTG;AAAAGTCATTGCCGATCCGA;GTCTCCTAGAGACAGAATGG
RIPPLY2	4	622;27456;38943;55172	1	1.50363	0.751814	0.170703	0.809453	0.808072	TTGGTGTGAAAATACATCGA;GGGTTAACATTAGACACCAA;CTAAGGTAGGATATAAACTG;AATTGGTACGGTTCTCCATG
LRRC4B	4	2831;7186;68185;71322	2	1.3714	0.751632	0.22775	0.832917	0.832843	CATAGGAACGTTAAACGATG;GCTCATCCTTAATTAGAGGG;GCGGATGATACGGTGCACCC;GAGCGTCAGGTAAATCCGAT
ZNF559	4	624;29429;39056;68128	1	1.50227	0.751134	0.171194	0.809951	0.808072	TTGGCATTCTAGCTATGTGC;TCTTCAAGCGATTTAACTGG;TACCTGATTTGACATAAGTG;CAGCAAATGTTGTATAACCA
PCSK1	4	625;27422;72469;75162	1	1.50159	0.750794	0.171434	0.809866	0.808072	GATGACACATCAGACCAGCG;TTACCTTAATGGGCCCAATG;GAATGACACGTCATCTAAGG;GCACGATCGATTGGTATGAG
CCNH	4	5080;5504;49386;71150	2	1.58247	0.750639	0.144047	0.804489	0.7989	GAGCAGGAGATTCGAGACAT;GTAGCGAACAGTGTCGACGG;GTTCCGTTCACGGTTCACCA;TCAGCACTGTCAGATCCGTG
PRRT1	4	626;52408;54238;61710	1	1.50091	0.750456	0.171706	0.809324	0.808072	CTTCTCACGAGTGATTCAAG;CAAGGATGAATCATTCGTGG;GGACACCATCCATCCACTCG;TAAGTGACTACTATACCTTG
Non-Targeting Control-TTCACGTCGTCTCGCGACCA	1	2445	1	1.50069	0.750346	0.171734	0.808244	0.808072	GAGTGCTGTCCCAATTGCCG;GGAGAACAGGCAATTAAAGA;TAGGACTGATCCGCTCCCCA;TTTACCGAGTAAAAACAGCA
TRAPPC5	4	3031;6985;19096;25474	2	1.39356	0.750303	0.216985	0.830784	0.830415	CAAAAGTGTAGTGCTTGTCG;GACCGCTGTAAAAAATGTGA;GGAGAGCAAGGTCTTCGGGA;GACAGAGAATTACATTCACT
ABCD2	4	627;48907;54234;76983	1	1.50024	0.750118	0.171951	0.808659	0.808072	GCAATTGTCGGCAAGAGATG;AGTGAATGAAGAACGAACGC;ATCTTATAGAAATCTCGTCT;AGGTTTGTTTCTAACTACCT
GNAQ	4	5278;5429;71610;72582	2	1.59348	0.749965	0.140725	0.80526	0.7989	ATCGGCGCAAGGCTCTCCAG;CGGGAGATTTACGACCGCTA;GCGGCGTCCTTGGACAAAGG;AACCGGGGTTCCCGACACTC
IGBP1	4	4448;5850;22328;23502	2	1.5337	0.74984	0.159945	0.806528	0.806013	CTATGACCGCTATGGCGAGG;CAAAAACCCTGAGAACAAGG;AGCGGAGAGGAGATTCAAGC;GAAGCTGAAGACGTACTCGA
GUCY2C	4	628;27515;45755;61659	1	1.49956	0.74978	0.172189	0.809173	0.808072	CGAAAAGAGTATGATACACT;CTTCATGGCCAACTTGTGAA;CCCTGACAAAAATAAGAGCC;AAATCATTTCCAGACACGCC
PPP1R7	4	4863;5637;20087;71959	2	1.56334	0.749281	0.150078	0.804559	0.7989	ATAGCGATCAAAAAGGTCGG;GAACCTAGACAAGAACACCG;GCTTAGTGACCCCCAAACCA;AACAGCTTGAGACCGAACAA
SNRPD1	4	4081;6097;19780;44280	2	1.50079	0.749155	0.171734	0.80885	0.808072	TTATAGTCCGAATAAGCATG;AAGGTTTCGCGAGCGTCTAG;AACAACTGTGTGATACACTC;AAGAGACACCACTTAAGCTG
PLBD2	4	630;19418;33189;63501	1	1.49821	0.749107	0.172691	0.80851	0.808394	AGTGGCTCGACTCTTGACCA;CTGGTAAGAATAGTTCAGTG;ACACACGTGAAAAATCACTG;ACCCAGCCGATGTCGACCAG
ETF1	4	2537;7670;7770;40744	2	1.32079	0.748927	0.254844	0.840959	0.840086	CAGTCTCTGCTGGTCGACGT;AAAATGAGTAGGCGAGAAGC;GTAAGAAGTTTGATAGCTGT;TCTGTGATAACTTGTTCTAG
PRKCSH	4	631;34501;52093;56534	1	1.49754	0.748771	0.172943	0.808481	0.808481	TACGCCAGGAGCGTGACCAG;ACCCTTGTGTCTAGACCTGG;AAGGAGGATGAGTCAAAAGG;CTGCCAGGCTGCATATGACA
RUVBL1	4	4739;5715;7851;18006	2	1.55235	0.748615	0.153641	0.8031	0.7989	CAGGAGCACAGTTCTTGTCA;CCTGAGAGTCATGACCCCTG;ACACTTACTATTACCGTCGA;AGAATGAGTGGACTCAGACC
CDR1	4	632;25568;38394;52198	1	1.49687	0.748435	0.173217	0.808559	0.808559	TTCTTCTTTCAGGCCTTCAG;AGTGGTGGCTATTATAGAGG;CAGCATTAATACTAGGTGTA;TCATGGCTTGCAAAACGTAA
ANKRD11	4	633;8118;16601;22568	1	1.4962	0.7481	0.173461	0.809097	0.808731	GTAGCTTGGATACGGTACTT;AGTAAAATAGATATAAAGGG;AACCGCCTACGAGACACTCA;CCAAGCGCCTGCTATAGTAG
DEFB115	4	634;38302;52250;66981	1	1.49553	0.747766	0.173702	0.809619	0.808731	TCTCCGCCTTGCCCGCCGAG;CGGCACGCGGGACTGCTACG;GCTACCACCCTGACCGCTAC;GCAGTAGAGCCCCTCCACCA
Non-Targeting Control-TGGAAAGCGAGCACACCGTC	1	2476	1	1.49522	0.74761	0.17375	0.809244	0.808731	GCAAGTGCCACCTCTCTCTG;CCTTCCAAGCATCATCAAGG;AAATGCTCAGGCACAACAAG;GCTAAACTCTACTGTAATCG
UAP1	4	635;23569;49226;75908	1	1.49486	0.747432	0.173949	0.80957	0.808731	TCAGGCAGGAAAAGAATACG;TCAATCGGCTCACCTCAAAT;AGGCGGCGGAGGCAGCACCG;AGAGGAGGATGATCCTGAGC
SERBP1	4	3978;6209;21509;51208	2	1.48634	0.747431	0.177105	0.810451	0.810398	GCCCAGCACCCGGTAAAGGT;CAGGTACACCCGGACCGGGT;TCCGACGGCGAGGTCCGACG;GCTCACCCAAGACCGAGACT
CARTPT	4	5280;5489;21205;35529	2	1.58466	0.746981	0.143331	0.803342	0.7989	CCAGCCAGAAGCCCCCATCG;GCTGGTAGTTATAGACCCAG;CTGGTGTTGCTCCGGTACAG;TCCAGGGTTCTTGGCTAACG
IZUMO2	4	637;34037;51011;55640	1	1.49353	0.746766	0.174436	0.80944	0.808731	GCTGGGACTACCGTACCTGG;CCCCAGCCTACCTTCCACCA;CGCTGCACAACCATCCGCTG;TGGTGCTCGTACACGTCCTG
ALDH3B1	4	638;18713;21319;36387	1	1.49287	0.746434	0.174709	0.808913	0.808913	GGTTGTCAGCGATGATATGG;GCTGGCCTATCACCAAGGCG;TGCACGCGACTCAGCAACCT;CCAGCTCGTCTACACCTGCA
WT1	4	639;17204;26010;52447	1	1.49221	0.746103	0.174959	0.809473	0.809113	GAGGTACTGGAATTGTCACC;TACAGATATGGCAACATCAG;AAATAGCTACGGTGAACCCG;GCCTGTAGGTGATCAACCTA
COMMD1	4	4973;5655;36500;58337	2	1.56079	0.745851	0.150879	0.802687	0.7989	CTAGTCCTCAAGTACCGTAA;GAGCAGCTTACCTCGATGGA;CTGCCGAAAATCCAGAGCAG;TTACTGCCAGAATCATGATG
RGS18	4	640;20138;23955;52380	1	1.49154	0.745772	0.175204	0.809416	0.809217	GAGGCAAAAAGAAATCCCCA;GCTCTACTGGAGCGACGAGG;TCACCCAAAAAAATGCACCA;GATTTCTGATGAAAAAGACG
CBWD5	4	4279;6050;8796;28012	2	1.50693	0.74552	0.169483	0.810397	0.808072	TCTCTTACCACAGCATTGAG;CACACTCTATGACAACGAAG;CTGTGCAGATTGTCCAGCCG;TGGACGCGTCATTGTCAAGG
HSFY2	4	641;40727;53352;66817	1	1.49088	0.745441	0.175456	0.809987	0.809217	GGGCCGTGGCCTTTAACAAG;TTCTGCGGGAGCATTCGCGG;TCATAGCCTACACCCAAGGA;AGGACAGGACGCTGTACGAG
ZNF284	4	4454;5948;14639;46238	2	1.52046	0.745267	0.164541	0.809563	0.808072	TCTCCTTACCCGAACAGTAA;TCATGTTGAAAGGCTTGACA;GATGATCTAAGCACCAATGG;AACTTGTGAATGCACGCCAG
SLC25A30	4	642;17785;54055;59406	1	1.49022	0.745111	0.175704	0.809938	0.809217	TTACCAGTGCGTCAAACACA;TCAGCTCCATATGGCCCACG;CATCTGGCGAAAGCTCTACG;GAAGCTGCGAGCTTGCCTCG
ASPG	4	643;8454;18615;21491	1	1.48956	0.744782	0.175946	0.809273	0.809273	CTCAATATACATCTCCACCG;ATGGGGGGCATAGACTTCGC;TCCCGTGCAATCGATAGCAG;GTGAGCACGGAATAGCTGGG
GPR149	4	5066;5635;20108;44605	2	1.56362	0.744672	0.150027	0.804968	0.7989	GAATGTCCCAAGGAACACCT;GGTTCACGATTAGCCACTCA;CTGATGTGCGGCCATACGTG;ACAGAATCAGCAAAGTACAA
OR10H1	4	644;10284;36557;61294	1	1.48891	0.744453	0.176194	0.809823	0.809338	AAGTTTATCACAGCGAACCA;AAGCATGGCTGGCTGTACAA;AAGTCGCGGTTAACGTGACT;ACCTGAACCATTTCTCAGTG
SRSF1	4	3250;6911;9300;34258	2	1.4019	0.744263	0.213024	0.829264	0.828463	GTAGGGCCAGTCGTACAGCT;GGAGGGTATAGGACCCCCGC;CCCCGCGCGACTCACGGGGA;GTCCGACCCTCCATACAGTG
ATP5H	4	4647;5862;9272;11850	2	1.53207	0.744145	0.160488	0.806032	0.806032	GTGTGGCATCCCGGCCATAG;GCAGTGTGAACAGACAGGTG;TCGCTCCACAGATCTACCGG;GCAACGTCAAGTGTGTTACG
S1PR1	4	645;18092;30381;63707	1	1.48825	0.744124	0.176469	0.8099	0.809761	TCTCCTAACTTAGATGTACA;GGTATGGACGTGATACTACG;GATCCGGAGCAGACGCCTCG;GCACCAAGAAACATGCCATA
CCDC173	4	646;30942;43607;50103	1	1.48759	0.743796	0.176721	0.810467	0.809761	CTGTTCGACTGCATCGTCCG;CACCCTCGCCGAGCGCATAG;ACACGCTCCTCCACAGTCGA;CTGACGCTAGAGGACATCTG
CDIPT	4	3622;6580;9710;38141	2	1.44047	0.743612	0.195785	0.821721	0.820508	CCGTATGGGACCGATACTCG;GAGGCACTGCTGGTATTGGG;GCCAGGGTAGGACCACACCA;TTGGACTAGTCATGAAGGAG
EARS2	4	648;10359;25705;63011	1	1.48628	0.743142	0.177222	0.810398	0.810398	AGGTACAAACGTAGAAATAG;GAAGGTACAACGGAGCTCAG;TGAGGACGGAATATCAGGCT;CCCGCCTGGACAACCGACCG
POLR2F	4	5127;5647;42101;53110	2	1.56192	0.742738	0.150563	0.803727	0.7989	GACCAATCACCAACTCACGG;CAACCCTAAGGAATTCATCG;CCGGTAGAACAATTCTACGC;CAGACTTGTTCACAGCACGA
SRP72	4	3942;6352;27563;73895	2	1.46831	0.742523	0.184261	0.816438	0.815941	GCAGCAGGTCTACAACCACT;GCTGGAGGACTCATCCAAGG;GGGAGCGAATCGCCAACACG;TCAGACCGTGTCTCAGACGG
TANGO6	4	2783;7525;8483;14894	2	1.33557	0.741883	0.246597	0.839312	0.838583	GTGGTAGAGCAATCCCAAAG;TCCTGTACTATGTCTACATG;CGAACCCACTTACTTCATGG;CTTTGGCAACACGACCATTG
OR6C74	4	652;18569;23541;71616	1	1.48368	0.74184	0.178213	0.812564	0.812136	AGCCTACAGAACATGGAGGA;AGTTGGCTTAGAATGGCGTG;ACATGGAGAAAGGACCCCAC;TGAATTGCCTGAGTTGTGGA
LRRC10B	4	654;8790;53877;69113	1	1.48238	0.741191	0.178731	0.812564	0.812175	CAGAGTAGGAGGCACACATG;CACATGTACACCAACGTCAG;GCGGCAGCCCGTAACCCGCG;GAGTGGGAAACTCCGCATCA
DUXA	4	3848;6459;18114;19555	2	1.45511	0.741062	0.189584	0.818662	0.816646	CCTCGACTCGCAGACCGGCG;GAAACGGTATAAGAACCGGC;GTACGTGTAAATCTGTCCCG;GTTTCCGCATGACCTCGAGG
YBX1	4	2974;7310;32352;59858	2	1.35808	0.74089	0.234651	0.836727	0.836676	ATAGATGGGAAGGAAAGTCG;GAAGATACTCCCAAGCGTCG;AGAGGCGAGCATTGTAATTG;TGGATGGAAAAGCGACACCG
LRRC14B	4	655;36460;53694;67621	1	1.48174	0.740868	0.178982	0.812532	0.812175	AGCGCTACAAGAACCGACCG;AAGCGAAAGAACAGGACTAG;CAAGTAGGCACTCACGCCTG;CACCTGAAGATCCAAAACTG
DCK	4	3517;6746;8394;49604	2	1.42086	0.740719	0.204351	0.827811	0.826551	CCACCATACTCAGGCAACTG;CCAGCCCATACCGGTAAGCG;GATGGGTGACGTGACCTACG;ATCCCCCCGACTGTCCAAAG
H2AFB1	4	2654;7744;13846;44174	2	1.31337	0.740606	0.259062	0.841615	0.841124	CCTGGACGGAGTGTACGAGC;AGAACGTTGACGAAGCACGA;CTCTTCTAGACGCCTCCCTG;TGGCAAGCGTAGCTATGTGT
AADACL2	4	657;12169;18406;38369	1	1.48045	0.740223	0.179477	0.813015	0.81249	CATGGCAGTGTTTCATGACG;TTTATAATGAGAGAGCAGCT;TTTGGAGAATGGGGAAGACG;TATTTCTATCCCTGCCCATG
LINGO1	4	658;13305;54765;72326	1	1.4798	0.739901	0.179722	0.812952	0.81249	GAAGGTGTGGCAATGTGTCC;GCTGGAGAATGGGGAAGGTG;CATGGCAGTATTTCATGACG;TGGAGAAGTTATCTCCGCAT
VWA3A	4	3787;6542;55777;70252	2	1.44503	0.739657	0.193802	0.821079	0.820508	GCCTCCATAATGAATGCTGT;TACAGTTAGGACTGAGGTGT;GTTCTAAGAGCAACAAAGCT;CAGTGATGTTGCATTCCTTG
TCEANC	4	659;37154;44655;45681	1	1.47916	0.73958	0.17997	0.812906	0.812906	CCTCAGGTGTCACATCCCGG;AGACGGCCTAAACGGACCTG;CGTGCGGGACCTACCAGCTG;CTGGTGAAGAGAAATTTGCC
RPL17	4	5221;5675;15078;56019	2	1.55796	0.739354	0.151843	0.80509	0.7989	AGAAGGGAAGCCCTACTACG;CATGTTGGAGTAAACACCCG;AGCCAGGCCTCCGTACCAGG;GCTTTAAGAACGTGTCGCTG
TUFM	4	4145;6284;8440;15908	2	1.47682	0.739294	0.180825	0.813841	0.81336	TGTAGGAGCAGCAGTCCTCA;GAGTAAAGCTTCCGATAGAG;TTGAGATACATGTTACTCGG;TTAATCCAACCTACATCCCA
LPIN2	4	660;52688;64003;64440	1	1.47852	0.739259	0.180223	0.813465	0.81336	CCAGCACTGACTCGAAGTAG;TGACTACAGCGATGATGGGT;ATAATCGCCATACTGGCCCC;CTTGCTGAAGATGCTCCTCA
C11orf57	4	3207;7091;39772;52097	2	1.38179	0.739235	0.222677	0.830808	0.830415	AAATACACATCTGAAGTACA;CAGACTTTGGATCCTCCCCG;CATGAATGTGCAATACCAGG;AACCACTCTCGGCATCGGTG
ASB15	4	4197;6261;26665;60331	2	1.47973	0.738766	0.179749	0.81249	0.81249	TGTCTTGCAGCGGTTACTAG;AATACATACATTGCTACCAG;TTCAGTGGAGCAAAGTGACA;CCTGCAGGGATTCTTGACAG
RSRC2	4	3937;6448;8749;38036	2	1.45645	0.738726	0.189054	0.819756	0.816646	CACAACTGTCTGATCCAGGT;GATGCTGGAGGGACAAACGC;CGGTCTCACAGACAACGTTG;GTGAGACCGTACTCAGAGTG
COX11	4	3137;7184;28204;49126	2	1.37162	0.738631	0.227687	0.833173	0.832843	CACACGACTCTTGGTGAGCG;TCTCCATTGCCATCGATACG;GGAAGGTTATAGTAAAAGGT;TCAATAGGAGTGTAAAAGAG
LRRC24	4	662;50236;63042;70263	1	1.47724	0.738619	0.180723	0.813966	0.81336	TGTGGACGTCAATTCCTCCG;CTTTGAAAGCCATGTACACG;GATGAGCAAAAGCTCTGCTG;AGTCTGGAGTGGTTGGATCA
NDUFB4	4	4692;5961;26149;29539	2	1.51873	0.73857	0.165231	0.809785	0.808072	GACGGACGAAGAGATTGGGA;CCTGCCAGGTGACCCAGTCG;GCGGCGGCCGGAAGAACGGT;ATCTGTTCCCGACATGCAGG
TINF2	4	3275;7044;12323;39245	2	1.38699	0.738328	0.220047	0.831862	0.830415	CTGCGCTACAACCGGCAGGG;CTCTACTGGGCCACGTTCCG;ACGAGTAGACCACGTAGTCG;GCCGCTCTTCGTCTACTCCG
PRRG4	4	663;35081;61665;72360	1	1.4766	0.7383	0.180967	0.813897	0.81336	GAGCCTTAAGCAGCCCTAAG;GTCAACACTGCTTAGTAACC;AACAGCAAACCCCCCAACAT;AGGTATCATTGAAGGTGCCA
ZDHHC3	4	664;17879;30424;44651	1	1.47596	0.737981	0.18122	0.814453	0.81336	GGGGAGTTGATGTTTCTCAC;AAGAAGGTTTACCTGCACTC;CCAAGCCCGGAGTAAGAAGG;CCCCGAAGAGTGATTGCCAA
TPPP	4	665;63958;67723;73247	1	1.47533	0.737663	0.181466	0.813814	0.81336	ACAGAAGTACGAGTAAATGT;ATTAACTGATCCAACAGGGT;GGATGCATAGAAAATAGGGT;CTGGAGTTGACCAAGAACCT
RPS27A	4	2899;7498;8647;23599	2	1.33835	0.737575	0.245108	0.839246	0.838583	AGCAGCTGGAGGATGGACAC;ACCTGACAGTCAAAAAGAGA;CTGTAACATTATTCACACTG;CTGCCTGGGCTTCGGCCCTG
METTL12	4	666;31206;31221;53924	1	1.47469	0.737345	0.181726	0.813815	0.813804	CTGGCAAGTCCAGAATCCGT;TGGGATCAATACCTGTGGAG;GGGGAAGTAGAGTGCAATGC;TGACGAGAGATGATGAACCC
FGF22	4	3714;6668;11980;27854	2	1.43001	0.737036	0.200306	0.823103	0.822154	GTAGCCATTGAAAACACTGG;ATGACAAAGATCCCATATGG;GGATATTATCATTGACATCG;GAACAGTACAATATGCTCGG
CRISP2	4	667;28052;31244;34065	1	1.47406	0.737028	0.182005	0.814484	0.813804	GTATGAAAGAAACGAACCGG;GATGAATCAAGGCGTTTCAG;GGAATCAAGTCTCAGTCCTG;CCTTTCCTAAGGGACACTAA
GFPT1	4	3855;6559;8574;10632	2	1.44299	0.7368	0.19462	0.821221	0.820508	TAGAATTCGAGCTAGCAATG;ATTACAAACAATGACCTACC;GCCAGTGTGTCCGATCACAC;CAAAGAAGCTAAAATCAGTG
THEM4	4	2929;7483;30489;37324	2	1.33991	0.736777	0.244315	0.840652	0.838583	TCTCATCCTCAAATACACGC;TACAGGCCGGAGCTTATCAA;CACACATATGCCCCTTCCAA;GTTGCTGGGTATTTCCCTGG
KLF15	4	668;9681;75697;76857	1	1.47342	0.736711	0.182254	0.81386	0.81386	GCAAATTCGCCCAGCCGATG;GTAGCCGGATTCCTCAGGCC;GTCTCTATATTGGATCTACC;CTCATAGGTCCAAAGAGGAC
KIFC1	4	671;36869;61458;75664	1	1.47153	0.735763	0.182999	0.816028	0.815941	TGAAGCTGCCTACATATGGA;TTTCCAGCAAAGTGTTACTG;AGGTGATAAACTTTCCACGG;ACAGCTGTATTCTGTACGGG
VWA7	4	673;7915;39936;49548	1	1.47027	0.735134	0.183491	0.81764	0.815941	AGCAGGATTTCACCTCCGGG;GATCTATCCGCAGAGCCCAT;GAAGAAAAAGACAAGCCTCG;TGCATCTGGAAGACTTATGT
SLC24A1	4	3852;6604;33820;41046	2	1.4376	0.735099	0.197023	0.821429	0.820508	GACAAGTGTAAAGTGAAGAT;AGAGGCGGACGACGACAGTG;AGTGGGTAGAGATATGCAGA;CTCTCAGACGCCGAACGACA
CRMP1	4	674;13657;63060;63429	1	1.46964	0.73482	0.183741	0.817017	0.815941	CTCCAGATAGTCACAGACGC;GGCGGTAGCGGCCTGACACG;GGGGAGGTCAATAATGTAAG;CTGAACACCACCAACGCCTG
U2AF2	4	4673;6062;10598;14934	2	1.50536	0.734589	0.170025	0.810522	0.808072	GGAACCGGAGCAGTTCGGCG;TCTGCGTGCTCTTCCCGGCG;ATGCGTATCTGTCCACGACG;AAGTGACGTGGAGGATCACT
ZBTB14	4	675;18333;18339;18526	1	1.46901	0.734507	0.183987	0.816376	0.815941	ATCGTGTCTGAGAAGCTCGT;GCGCTGGTGGAAAATCTCCG;CAGAAATGGCCGGTATCCTG;GTGTTGGTTGAAGATGTGCG
ORMDL1	4	3593;6839;46235;58421	2	1.41011	0.734488	0.209251	0.827914	0.827028	AGCGAATTTACCACAAATCA;TTAATGGAATCATAGTGCAC;CTTTGAATATCGAACCATTG;AATGGAATAGACATTAACTG
CHEK1	4	4720;6041;23271;29922	2	1.50812	0.73434	0.169009	0.809978	0.808072	TCCCTCGGAAATCATCCGAG;CAGGTACGCGATACACAGCG;TGGACTGTACTTTGACACCG;CCCTGCAGCACAGTGCACCA
FAM25C	4	676;12288;26892;39928	1	1.46839	0.734194	0.184237	0.81691	0.815941	TCTCAGGAAGCAATGCACCA;AGATGCCAGAATTCATGTTG;TCTTATATGTAAAGTCACTG;AAGTTGGCGTTATTAAGCCA
DGUOK	4	677;15646;24771;49664	1	1.46776	0.733881	0.184479	0.816253	0.815941	TCAGCCGGGTCGTCGAACAC;GTTCTTGCAGTAGACTAGGC;GCGACGCGCACCAACGGTGG;GAGGTACGCGGTGCAGACGG
PATE2	4	679;9514;51130;76615	1	1.46652	0.733258	0.184973	0.817287	0.815941	CACCGTGCTGCTCTACGACG;GACGACTCGAAGAGCTCGTG;CTACAGAAGCTGCGCGACGA;AGCAGTGCCACCGAGTCAGA
MARS	4	4156;6425;9684;29300	2	1.45927	0.733126	0.187841	0.81902	0.816646	CTGGTCGTACAGGAGCACGG;CCCCGCGGCACCTACCCTGG;GCGCCGACTCGTACAGCTCG;GACCGCGACTCCATGAGCTG
KLHL18	4	680;29845;38781;61445	1	1.46589	0.732947	0.185223	0.817247	0.815941	CCTGTACAGGTCGTAGCCCG;TTTGCAGCCAAGCCTGACCG;ACTCTTCCATAACACCCAGA;CCGCCATTTCACCCAGTAAG
YDJC	4	4597;6152;25342;64171	2	1.49365	0.732608	0.174315	0.809478	0.808731	GGGGATCTCCCAACCTGCCC;ACACCGGCGCGTGGGGAACG;GGCAGGCGGCCTGTGCAGCG;TCCAGGCATCGCCGCCCGGG
HDAC7	4	2927;7608;17198;35128	2	1.32707	0.732586	0.251257	0.841047	0.840086	GTGTAACTGAGAGGCGCTGT;TGGAATCAATCCCAGGATAT;TTACTTTGAAACTCCACACC;TTCAATCAAAAGCCTTACCC
HSCB	4	3633;6856;8986;29172	2	1.40817	0.732471	0.210078	0.828057	0.827028	TGACCACTGTACCCTCCTCG;GGACTGGCTGTACACACACG;GTGGGGCAGAGCAACGACCG;TGAGCAATGACGATGCCGTG
RTKN	4	5202;5835;17054;21532	2	1.53575	0.732363	0.159234	0.80683	0.806013	GGGAGATTGTGCACAAACCG;CGATGGCAGCCATGTCACTG;GTGGGCCAAAGCAACGAGCG;TGATGAGAAGACACAAGCGG
GTF2IRD2B	4	682;27736;35645;50421	1	1.46465	0.732326	0.185722	0.81601	0.81601	AGGAAGGTGAGATCGTTCTG;CATGAGGCTGGCATACTGGG;CTTGGAGCGAATTCGAAGGA;CTGGGGGTCGATGTCACGCA
EVL	4	4812;6039;66159;73347	2	1.50838	0.732183	0.168958	0.810355	0.808072	TCAACAACTGTTCAATATGC;TATTCCCATCCGAACAACCT;AGGTGGAGGAAACCTTAAAG;GAGGATCCAGAGTCATAAAG
OTUB2	4	683;11795;22183;41718	1	1.46403	0.732016	0.185972	0.816536	0.816214	CACAGAGAGCTTACGCAGCG;CATGACTACATCGTGCGCAG;GATGAAGTACTATATAGGTG;AGGCTCGCAAGTACTTTGAA
JUN	4	3380;7109;37059;49079	2	1.37981	0.731983	0.22366	0.832497	0.832007	ACAGCATTCATAGACGGCAG;TTGAGGATAACAGTAACAAG;CTAAATGCTAAGAAGCGCCA;CAAGCACTGCAGAATCGAGT
SYNE2	4	684;15826;24844;32287	1	1.46341	0.731707	0.186224	0.8165	0.816306	TCAAGGAAGAGTGCAAACGC;TCAATACGACGATCTCACTC;ATGCAGATCAAGTCCAACAT;AACAGTATCAGTGAACCCAA
LEMD2	4	3986;6586;28945;43222	2	1.43975	0.731657	0.196063	0.820695	0.820508	TCTCCTCCGTCGGGTCCAGG;GTGCCGAGACCCCATCAACG;ACCAGCGATACATCAAAACG;CTTGTCAGATCTGCTCCCGG
NBPF12	4	3802;6734;75341;75547	2	1.42226	0.731583	0.203784	0.826049	0.826049	CTGAACAAAATCCTCCAAGG;GGGAAGGTCTCACTGCACTG;GGCACAGCGCACACACATAG;AGGTGGTGGGCACATCAAAG
VCAM1	4	686;26681;52606;71724	1	1.46218	0.73109	0.186729	0.817006	0.816646	TCTTTGCTAAGAAGTACCAG;TGTCCAACAAGGAATCGGGC;GGACGGCGCGAGGCCAACCT;CCTGATGAGAGCCCCCGCCG
PIK3CA	4	5084;5923;23685;59894	2	1.52382	0.730998	0.163437	0.809199	0.808072	TGTTGAAGAGTGGACTTCCT;GATGAATAATCAACTGTAGT;CCAGTGTAAAGATCGAAGGA;TCCTAAAGAGATTAATATGC
CXorf65	4	687;57024;63713;68852	1	1.46156	0.730782	0.186979	0.817527	0.816646	GGCCGGTACGTACCTCTGGG;TCCGAGTCCAGACCCCGCCG;GTCGCCAATTATGATGACGG;TGTATCGACAACAGTCAACG
PNMT	4	688;42254;58062;73941	1	1.46095	0.730475	0.187227	0.818043	0.816646	CCATTGACTACGGATTCCAG;GCCCCCGCGGCACATCCCCG;GTTGTCGCCGATGACAATGA;AGAACTGCCTGAAGAATGCG
OR8U1	4	5490;5745;34444;50748	2	1.54816	0.730435	0.155075	0.79929	0.7989	GAGCAAGAGGTCTAATACTG;ATACTAAACTTGGGGTCACA;CAGGAGATGACGCAATGGAC;TGGGGTTCCAATGCATCCAG
KCNH2	4	4563;6224;8284;72694	2	1.48443	0.730403	0.177842	0.811462	0.811462	CATATCACAGGTGCAAACGG;GATCCACCGATCTCCGGTAC;CATTTCCGCAAAATAATCAG;GAAGAAGGCCGTGAACGACG
AP2A2	4	689;32808;39025;48677	1	1.46034	0.730168	0.187473	0.817983	0.816646	GCAGTGTGCTCGATGAAGTG;TGAAACACGAATAATGACAT;GGATAATACACAATTCCCCA;AATTCATGGGCTCGGTACTG
DOLK	4	2915;7713;13464;15552	2	1.31647	0.729578	0.257301	0.841553	0.841032	GAAGTGCTCATGTACAAAGA;TGGAGCTGACATCTCGCCGT;CAGTGCCTCACGGAATGGCG;ACCTCGCGCCGGTTCCAGCG
FER1L6	4	691;18030;35151;76944	1	1.45911	0.729555	0.187983	0.819067	0.816646	ACCTTGGTCCGGACCCGCCA;AGGGCCACCCCCAGACAACG;CGGGGCCTGATGAATGACAT;GGACTGATTGAGACCACGCG
S100A11	4	3097;7492;27891;31277	2	1.33897	0.729373	0.244811	0.840518	0.838583	TGCCAGCTGCGACATTGCCG;CCATGGCAATGACGGGAACG;GGGCCCATGTGTCTCCGGCG;CTCTTGCCAAGGCAACCCCA
VN1R1	4	692;51300;65579;67789	1	1.4585	0.72925	0.188241	0.819623	0.816646	AGCAATGAGAGCCAGTCAGA;GGCATCGAATAGCCCAAGGA;TCCAGGCTCCACCTGACTAG;TGTATTTGACTTGATCAACA
RPL6	4	3822;6780;8336;69913	2	1.41691	0.729159	0.206118	0.826974	0.826551	TGCCGCGTGCAGCACCAGTG;CCAACAGGACCGGTCCCAAG;CCAATGTGGGCACCCCAGGA;CCTTCCTAACCGTCAGCATG
CXorf40B	4	5684;5693;39907;75123	2	1.55543	0.729003	0.152631	0.80519	0.7989	TCGGACTTACCTACGATGTG;GCAGATGGAGAACCACGGTG;GGGTTGACGTTCATGAATCG;ATGCGCTGGATGATGTTGCG
GRAMD1B	4	693;20159;31166;66288	1	1.45789	0.728945	0.188491	0.819578	0.816646	GCTTAGGTGACGGCTGCCCA;ACAACTGTTATGGGACCACC;CCAGCTGTGGTGCATCTACA;GCAACTCCGAGCGCAACTCT
FOSL1	4	5241;5892;49357;52020	2	1.528	0.728933	0.161948	0.807553	0.807553	GGCACCAAAGACGAGGACTA;ACATGCTGGAGAACAGACCG;CAGGCGTCACAAAGACTGTG;AGTACTACAACCAGACTACG
LILRA2	4	5578;5744;48158;54100	2	1.5483	0.72871	0.154933	0.799215	0.7989	TGCCTGCTACTAGATGACCC;TAAAGATGACGAGTGCTTCG;CACTTCACTCCATTATGGAA;CCGAGCCCATTGTCTATCGA
PRSS53	4	3185;7419;22918;68441	2	1.34657	0.728364	0.240672	0.84008	0.838583	ATGCACTAGTGACAACTGGA;CTTCCGAAATGCATATGTAT;TCTGTACAAGCAGTGTGCAT;ACATGTTTATCTATATCTCA
TMED10	4	3860;6771;22976;48220	2	1.41796	0.728299	0.205637	0.827156	0.826551	CTGTAGTTGGACAGTCCATA;GTGTGTCTACTATTGCCACC;CACTGCAGCCAGATCTGAGG;CCTGGATCGGTGGTGCTCAG
GCH1	4	696;14785;43533;56398	1	1.45606	0.728032	0.189254	0.819493	0.816646	AGGCGTGCAAATGCTGTTCG;GTAAGAGAGTCCTTCCTATG;TTTCTTCACAAAGAGTAGTG;ACAGTGGGCTCCCTTCAGAA
XYLB	4	4412;6388;11071;70353	2	1.46384	0.727513	0.186029	0.816214	0.816214	AAGAGAATGATCCATACCAC;TTGTGAATGACATTCATACA;ACAAACACGCCAAATGCACC;ATGGCTCGTATTGCTATCAT
PMM1	4	698;40853;57592;75931	1	1.45485	0.727426	0.189756	0.81828	0.816646	CATCTGATCTATAAATGCGG;TGCTCCAGTCAACGTTACAA;ATTACAGGGACATCTCAGGT;GCACAAATGCTACTGTGTCG
FAM96A	4	3437;7179;64084;75073	2	1.37216	0.727347	0.227428	0.834169	0.832843	GCATGACACAAGTCGGCAGG;CGGACAAGAGCTACATCGAG;CCTCATCATCAGATCCAAAG;CAAATATGGTCCTGCCGATG
TAF10	4	3662;6966;22701;25564	2	1.3957	0.727334	0.215987	0.82949	0.82949	AAGATAAAGTCTACCTTACA;AAAAAGCAATCGTTCAGCAG;CCAGTTCTTCAGACAAACAA;ACAGGGTCACTCAAGTAGAT
PRY2	4	699;47572;57085;69503	1	1.45425	0.727124	0.190011	0.818821	0.816646	TGCCTCTGCAGTGAGCAATG;TGGTATTGGGAAAGGCCTGG;TGGATGCTTACTTGAAGACG;AAATTTGCGGAGAAATTCAG
ALG1L	4	700;14809;42472;62034	1	1.45364	0.726822	0.190237	0.817549	0.816646	GGAGAAGTCGACATGCCCGG;AGACACGCTTCACTGATACC;GGACATCAAACTGGACAGCG;GTAGAACCGACCTTTGTCGG
NDUFV1	4	701;8502;25295;43656	1	1.45304	0.72652	0.190487	0.816947	0.816947	GTGTCGAGTAGCACGTTCGG;TCAGGCGGATGTTGTCATCG;TTATCGAGGTCACTGAACAC;CGTCCTCAAAGTACACATCC
PRR23D2	4	702;10581;50827;52323	1	1.45244	0.726219	0.190743	0.817488	0.817488	CGGGCATATTTGACGGACGG;GGTCACACTCTCCGAGAGCA;CGGGTCCTTGAGCAGCTCCG;GAAGACTGCCGGGTTCTCGA
TRUB1	4	703;36621;61367;76114	1	1.45184	0.725919	0.190995	0.818011	0.818011	GCTGTGTTGATGTTAACACG;GAGTACCGAGAGTATATCGG;TGATACCATCCATCCTCACT;ACATTCTAGTGAATCAGGAG
SMEK1	4	704;19891;47657;76242	1	1.45124	0.725618	0.191237	0.818491	0.818271	TCTCTCCCTTTAGTATTCCG;TGACGGATTCATTTCAAAGG;GCTGTGTAAATGTATTGGAG;CCTTCTCAAACAGCCATCTG
TAF4	4	4356;6472;8403;43784	2	1.45352	0.72559	0.190286	0.816646	0.816646	AGTGGTCTATGGCTCAGCAA;CCTTTGGTGATGTAAAGAGG;AGTCCCTCTGAAGAACCAAG;GCACCATGATGATTCGCCGG
SARS2	4	3795;6899;30226;64814	2	1.40326	0.725476	0.212338	0.829675	0.828463	TCTCCTTTCTGAGATCGTCG;TATTACAGGTAACCACATGG;TTATATGATGAAGTAACCCA;CTTTGTAAATGCTCTCGCCA
GPN2	4	3249;7440;9883;15044	2	1.34438	0.725127	0.241867	0.840515	0.838583	GCTGCATGATCTGATTGCAG;TTCGAATCGAATGTATCCAG;CCATGAGTCGAATAATACAG;GTCATTAGGATGCTGTCCTA
VBP1	4	3759;6942;13324;72489	2	1.3984	0.725022	0.21472	0.829188	0.828801	GAGGTGGATGAGGACTTCGA;CCTGCAGGTATGACGCTGGG;ACTCCGGGAACTCCGTGTAG;CGGCGGCTGGACATCAACGA
HSFY1	4	706;24893;30339;71914	1	1.45004	0.725019	0.19174	0.818968	0.818527	AGACGTCCAGAACTAGAAGC;CTGGTACTATACCCACAGAT;GCAACAGCGCCGGACATTCG;AGACAGATGCACTATTAAGA
TRAK1	4	5524;5848;39786;47856	2	1.53398	0.725017	0.159901	0.806955	0.806013	ATTTAGATCATCACAAACTG;CTGGATCACTATGACAGGAA;ATGAGAGATGGTGATAACAA;GAAGCAAATGATTTACAGGG
OR52A5	4	4526;6377;12643;53083	2	1.4652	0.724953	0.185498	0.816738	0.815941	GAGATGGAGGATGACCCAGC;CAATTTGTATGAAGCACCCG;GGACCCGTAGGACATCCCCT;AGGAGGCAGGGCAGTCATAG
EVPLL	4	4668;6292;21201;64833	2	1.47582	0.724867	0.181271	0.813519	0.81336	GAACACGGTTCACCTCGATG;GCTTGGCATCCACCTGACGA;GCAGACGTTACCCAGGAGTG;AGCCACATGCCCTTACATCA
WTAP	4	707;23312;27158;65777	1	1.44944	0.72472	0.191991	0.818927	0.818927	GTGGAGCCTCTTACACCCAG;TCTTGCCGGAATGTCAGCCG;TGTCACCACATAATTACCTG;GTCTGCGTACTTCCAGACCA
RPL18	4	5042;6094;9767;12794	2	1.50118	0.7244	0.171535	0.809734	0.808072	CGGCGTCCACATGGGCCATG;CCGCCAAAACCGTCCCGAAG;CCCGCCGCGCAGCATCCGTG;GCAGGGCACGATATAGTCCA
P2RX7	4	3026;7732;8974;30897	2	1.31457	0.724182	0.258347	0.841032	0.841032	AACAGGTTATGTTCGCCACG;GCTGGGCAAATACTACGTCA;CACGTGGATCGGGGGCAACG;ACAGGGCACGATGTACTCCA
MYDGF	4	709;17142;38438;52411	1	1.44825	0.724124	0.192497	0.819971	0.819305	GAAAGCTCTTAGACCTTCAG;CTTCCTTTGAAGGCATACGA;TTTGTTACAGGATCCTCATG;AGTCCTGCGACAGTAAGGGG
KY	4	710;14459;31050;72672	1	1.44765	0.723826	0.192751	0.819941	0.819305	GAAGATCGTGAACACCCCAG;AAGGCGTTGAGTTTCCTGAA;AAGCGGTAATGCTCTTCCAA;TCAGCGTCATCGACACACCA
Non-Targeting Control-AGTACCCCTAGGTATGGGGA	1	2763	1	1.44759	0.723795	0.192751	0.819386	0.819305	TAAAGTTGTAAACTCAGACC;TGGGTGCCAATGACCAAGTG;CGTGGAAAACAGCATCAGCG;CTATAGGATTGCCCACGCAG
IGSF23	4	4134;6679;16630;51495	2	1.42871	0.723575	0.200844	0.823159	0.822154	GTGGACGAAGAGGGTCCCGA;GACGTCCCGCAGGCGGAGGT;CAGTGTCCCGCAGACAGGCG;TGATGCCTAAAACGCTAAGT
Non-Targeting Control-TCATCTTACATCTGGGAGAC	1	2766	1	1.44712	0.723559	0.192862	0.819305	0.819305	GTGGGACACTGCTATCTCCG;GGAGGCTCGGGAAGGCCCAG;TACGTCGCTGACGCCACTCG;AGCTACCATCCAGATACTCG
ASTL	4	5117;6075;26095;69969	2	1.50366	0.723539	0.170584	0.809502	0.808072	CTCCCCGCTAGAGTATGCTC;GTAGGTTTGGATAAATACCT;AGGAGGTAAAAACAGACGCA;AAGAGGTTATGTCACATCAG
NSMCE1	4	711;42815;45720;75811	1	1.44706	0.723529	0.193002	0.819347	0.819347	AACACCTGTCTTGAACGAAG;GGCCCGGACCCCGAATATGA;ATAGTCGAGAGAAACAAGCG;TTGTTGGCTATCACACCGCG
KCTD4	4	712;24933;44710;55096	1	1.44647	0.723233	0.193257	0.819875	0.819875	GTACCACCCATTACCTATTG;GAGACAGAGTTGCGACCGCG;GAATATACCGAAGTTCAAAG;TTATCTACCATACTACAAGA
TPT1	4	3385;7364;23877;49903	2	1.35235	0.722646	0.237632	0.838316	0.83717	GTAGGCCTTCCCATCCACGT;GCAAGACGACTCCATCGTGG;ACTGGCCAAGAAACACTGTG;AGGATGACCGAGCTGCACGC
MPDU1	4	3648;7107;21389;25190	2	1.38003	0.722584	0.223486	0.832342	0.832007	CAGAGGAGTCCACACCACAC;AGGCAAGACTGATGAAGCGG;AAAAAGATCATGATTGAGCG;AGTCACAGCCTGATTTGTCA
GOLGA8K	4	3061;7737;13948;21907	2	1.31407	0.722555	0.25862	0.841049	0.841049	TGTGGATAGTACCACAAACA;TCCCGGCACAACATCTACCG;CGAGTTCAGTGATGATTCTG;CCGCCCTACATCTCTCAATG
ELL	4	4771;6296;14092;15534	2	1.47531	0.722154	0.181495	0.81336	0.81336	CCTCCACAAGTCGTCCGAGT;AAGAGACTACACATACGAGG;GAAATACTAGAGAAAGATGA;TCAAGAACCAACTGAACCAG
CAD	4	4585;6415;9783;17248	2	1.4605	0.721864	0.187334	0.817945	0.816646	AGACAAGCCACAATTAACAT;TATCACTTACCAATAAGCCG;TTGGTCCCTGGAATGTCCGT;CATATAGGTACAGTAGCAGA
ITGB2	4	717;10726;14311;64744	1	1.44351	0.721755	0.194475	0.821161	0.820508	TTTGATAAAGAGCGCTTACG;GGCAGCGTAAAGAAGAACGC;TCAATGGAGGACTCTCGTTG;AAGGCCAATTCGTGTCGGTG
TLX2	4	5724;5837;22560;26691	2	1.53548	0.721579	0.159399	0.807015	0.806013	AGGATGCGGATATAGAACCG;GGAGGAGAAGGGCACTACCG;TGATATGGGACTCGAAATCA;ATTGCAGCGGAAAACAACCT
SFXN5	4	718;12005;18839;50864	1	1.44292	0.721461	0.194739	0.821173	0.820508	GGATGCGGATATAGAACCGG;GCAGAGCATGGTGGTAGATG;AACTTGCGACTCTCCCCAGA;TCTTGGCAGCCAGAGATGTG
SERTM1	4	719;33677;41980;42251	1	1.44234	0.721168	0.194986	0.821663	0.820508	GACCTACCGGTACGCAACAG;TCCGCAGAGACAAAGATCGT;GATGCTGCTTACATGTCCTG;TATCCCAGGAATACACTGAG
TSPAN11	4	5233;6072;56320;70567	2	1.50405	0.721122	0.170511	0.810379	0.808072	TGTCGACAAACACTCAGTGG;GGACTCCCATTAAAGTGCTG;CACGCCAACCCCAGTCCCGG;CCACGAGTACTACAGCCGAG
RPTOR	4	3755;7053;7852;37594	2	1.38599	0.721015	0.22053	0.831686	0.830415	GCCCCAGCGTATCCTTGTAG;CTTCAAAGGCTGTCGCAAGG;TGACCCCCCCGGACCCAATG;GAGTACAAGATAGATGAGGA
SEMA4F	4	720;21953;48226;59957	1	1.44175	0.720874	0.195247	0.822211	0.820508	CAGATTAAGTATAACCGCGA;TGGGCCATACCGGAGCTGTG;CAACGACATCCAGTTATCCA;AAAATCACCAGTGCTGTTTG
MPI	4	4811;6307;38930;56881	2	1.47393	0.720724	0.182031	0.814024	0.813804	CCTCGTCCTCGCCTTCCCAG;TAAAGTCATCTCTTGAAGAT;GTCTTCCACGGAGAAAGCGT;CGATGATGATGAAAAAAAAG
LCE3A	4	722;11008;35798;38175	1	1.44058	0.720289	0.195758	0.822156	0.820508	CACAACATGGCAGATAACTG;GTCGATCATGCACTTGCACA;AACGTGGGCAAGTTGCTCAA;CCCCGAGGTACAAAATCTGT
AAMP	4	723;17225;30757;50850	1	1.43999	0.719997	0.195986	0.820919	0.820508	CAAGAATACACCTTGGCCCG;CTGGTAGTAATCTCCTAACA;ACTTCTTGGCAGTCTTACAG;TTGGAGGTATACACAAGCGG
SLC25A27	4	725;19459;47559;51015	1	1.43883	0.719414	0.196484	0.821365	0.820508	GGAGCCCGAAGGCGTCATCG;AAGCACATCAGAAGGCATTG;AAACATCTTGATGTATTTGG;CTGCACCTCAGCACGCACGT
KANSL1	4	4184;6752;16865;19354	2	1.42016	0.719283	0.204644	0.827931	0.826551	ACTGATGAGAACCACCTGTG;CCTGAATATCCAAACACTGG;CCGCATCTTGGTGAAACGGT;TGATTCGTCGCAGAAGCCTA
NPHS2	4	3203;7665;15864;17174	2	1.3213	0.719228	0.254578	0.841406	0.840086	AGCAGCTCGAGTGGACTGGG;TGCCCTGAGTCTCAATGAAG;GTCATCGTTACTGTGCCAAG;TGTCATATCGGTCTTCATAG
EGFR	4	5499;5989;10863;38937	2	1.515	0.719196	0.166521	0.80854	0.808072	GAAGATGAGAAAAACAAACG;TTCTCCTCTTCTGTAGTCGG;AAACTTGGCAAGCAAACCTG;AAAGCTTACCTGTTCTGTAG
STC2	4	726;29954;56608;57918	1	1.43825	0.719123	0.196743	0.821898	0.820508	AAAGGCAGGCTAGTCACAGG;GAGGAGAGTAATGCAAAGGG;GTCCCCAAGGACAGCACGGT;AGGTCCAGGACGAGTGCAGC
NFATC1	4	727;12639;62604;73468	1	1.43767	0.718833	0.196997	0.821868	0.820508	ATAGTCATGAGGTAGCTGCG;ACTATTGCACCACGCCCGGG;CTCTTCTCCACCACACCGGG;GGATCGTCGCAATTCTCCCA
IL1RAPL1	4	3877;7011;49990;54438	2	1.39066	0.718663	0.2183	0.831258	0.830415	GTGGCGTATAGCGTGCCCCC;ACTAGCTGCCCGATTCCCGG;GGCGTGGTGCTGTAGCAGTC;CTATACGCCACTACCCCCGG
BABAM1	4	5191;6153;45116;60538	2	1.49353	0.718528	0.174464	0.808973	0.808731	ACTGGAAACTAACCGCCATG;TGGTGGTGAGCAGACGACAA;ACTGTGGCAATGATCTTGCG;GGATCTCGAATTCGGATCTG
RMDN3	4	729;9678;9828;54936	1	1.43651	0.718253	0.197507	0.82127	0.820508	GAACGATGACGTCCCATGGT;CAACATCTTGATCTTAGCAA;ATTAGACCATGAACGAGCCA;AATGCAAATGAGGCTGTCAA
Non-Targeting Control-ATGCTGCAGCTTTACGATCA	1	2838	1	1.43596	0.717979	0.19761	0.821154	0.820508	GGTGTAAAGTCTGGTCCTCG;GCAGCTAGCGACCAGAAGCA;AAGCCAAGGACAAAGCCCGG;CATGAACCGAATCCTAGATG
SLC5A7	4	730;19266;63317;71249	1	1.43593	0.717964	0.197754	0.821208	0.820508	GAAGTCATCCCTGAAGCCTG;TCGCCCTGAACCGTATTGAA;GTCTCCCCTCCTAGGTCCCG;GGTAGCTCTCGAGAATCTAG
HSD17B1	4	3845;7060;34610;45334	2	1.38521	0.717859	0.220963	0.831823	0.830415	GATGCCCCGTCTGATTGCCA;CTGGGGAGAAGATACAACTG;GTCATTCTTAACATCAAACT;AGACTGGATGTAAAAGCCAT
GNB1L	4	4031;6913;8065;16285	2	1.40168	0.717607	0.213082	0.828463	0.828463	GATGACTTGGACTTCGAGAC;TCTCGACGATCTTACATGGC;GTGAAATTCTAACCTTGGCG;TCCTGGATGCCAATCAGCTG
DTWD2	4	4183;6803;26419;75830	2	1.41425	0.717342	0.20734	0.827649	0.827028	CGATAGACGCGTGCACCACG;TCCGATCGCTACCAGACAGT;AGACACAGTGCAGATTAGGC;GGCCACGTAGTCATTGCAGG
GNG8	4	733;9298;23059;38974	1	1.4342	0.717099	0.198476	0.82149	0.820999	GGGCCTCCGAACCGTCGCGC;TATCCGGTTTGACAAACGGT;TGTGAACTACGTGACCGCGA;TACCTGTAGTCTGATCCACG
ATP8A2	4	4723;6452;24005;63147	2	1.45596	0.716881	0.189281	0.819043	0.816646	ATGTACTAGGACAGTTCGTG;GACATGAACTATGAAACCAT;CCAAGTGCCAGATTAGAGCA;GCAGCATCCTCTGTTCGCAG
PFDN5	4	3596;7315;11623;19203	2	1.35755	0.716862	0.234903	0.836676	0.836676	GGACTGGATCAGCTACCAAG;GCAGTCACGAAAACCATCTG;AACCCCCAGATGTCATTGGA;CAGTGCGATGTACAGCTCGG
SERPINA7	4	735;43023;62457;63953	1	1.43305	0.716524	0.198995	0.822016	0.82192	GCCAACATGAGTGCTAAGGA;TGAGTGAAGTGCGATATCCG;AGCCCCAGGTGCAACAGACG;AGAACGTCCGCGCCTCTGCG
CFAP58	4	738;10585;33543;35234	1	1.43133	0.715665	0.199731	0.822891	0.822154	GGGCACAGAGGGAACGGCGA;GAACCAGCAGCTGCAAACCA;CCTGGCAAAGATCATGTCCG;TGCCATTCTTGATCTCCGCG
MRRF	4	4593;6572;10167;41019	2	1.44142	0.7153	0.195329	0.821454	0.820508	CCCCCGGAAAGGTAACTGCG;ACGCCACCTGGGTATACACC;TGGAGGCATTCCTACTTACG;GCAAGGCTGGTTACCCAACA
COPS6	4	5523;6069;8525;21171	2	1.50444	0.715193	0.170317	0.810685	0.808072	GGAGAAGTAATAAAGCCAGC;GATAATTGGATCAAAGATGC;TCCATCATACCATCATGCCG;ATGTACAGCTGTATTTAGAA
RAB42	4	742;34731;55939;70809	1	1.42905	0.714525	0.200758	0.823883	0.822154	TATTCCACCCAGTCTTACAC;TCCGAGCCACCAATTCAACC;TACTTCCAACAATATTTACG;AAAACAACTTGGTCATAGTG
SUV420H1	4	5713;6006;19511;43805	2	1.51274	0.714211	0.167317	0.809902	0.808072	GTAACATAGGCTTAAAACGG;AAGAAAGTGATGATAACGAT;AACATACCAGTCATAGGAGA;CACCAATAAGAATCATAGGG
ARSI	4	744;17837;34991;37810	1	1.42792	0.713958	0.201243	0.822649	0.822154	GCTTGTCCAAGTAACCGACT;TCATACACACCATCATAGTA;CCGAGGCCGGCGCTTCAAGT;ATGGCCATAAGTGCCTGAAT
KSR2	4	745;67698;73259;77255	1	1.42735	0.713675	0.201501	0.822632	0.822154	TTCTCCGTCTACCAGCACTC;TTTATTAAAAGGGAATCGTG;GAGATCGCTTCAAGATTGAG;CGAAGTGATATCCACTCGAA
SLC24A3	4	3552;7471;40799;54246	2	1.34115	0.712921	0.243614	0.841467	0.838583	GAGATGGGTGTATACGACTG;GGGCCAGCTGAGATCCGTCG;GTGCACATGTCACTAACGTG;AATTTGGCCCAAATACACTG
RGS9BP	4	748;15789;48598;49310	1	1.42566	0.712828	0.202248	0.823542	0.823542	GCCAAGCCCTCGGACACCGG;GGCCGGGTCGAGCGTGACAG;CGTTGGCTGAGCCCATAAGT;GCGAACTGTGGCCCACCCGA
ZCRB1	4	5377;6202;22737;32980	2	1.48723	0.712454	0.1768	0.810236	0.809761	AGGAGTGGTCTGGATCGGTG;ATGAGCCAGGACACGTAGGG;CGTACTCCAGCCTTGGTCCG;ACCACTAGCCAGGTCTCGAA
MYO1F	4	3352;7701;31694;52661	2	1.31767	0.712311	0.256601	0.841891	0.841032	ATACATATGTAAGCGAAACG;CCTGTCATGGGAATACAGAG;GGAGGCTCCTTCAAGTCACT;AAAAAACTCTACCACCCAGT
EIF3J	4	3403;7653;21731;42878	2	1.32251	0.712035	0.253865	0.841263	0.840086	ACAGCAGCTCTGAAGAGACC;GGTCATCGGCATGGACGTAG;GGAAAGATGCCACCAATGTG;AGGTCCTACCTTGCTAACCA
ICE2	4	751;10745;11243;39417	1	1.42397	0.711984	0.203017	0.82507	0.824337	GTGCCCCAGAATGTCATCAG;GACAGCGGCCGTCCTAAACG;GTCCTTGTTGAGCACATGGT;ATCAGTTTCTATGACGACAT
EIF5	4	5403;6203;16230;18891	2	1.48711	0.71187	0.176825	0.809761	0.809761	TGTCACGGACATGTTGAGCT;TGGTAATCCTCCGACAAACA;GAGTAGTGCATTATGGCAGG;TGGTATCATTGGGTTAATGG
AVP	4	752;8767;26210;51444	1	1.42341	0.711703	0.203269	0.824493	0.824493	GGTTCTATAAAATCCCACGA;CTCATCAAACCAACAGAGGG;TATCCTGTGCTTAACGTGAA;ACACCAGGTACGTGCTCATG
RPIA	4	3392;7675;9468;46815	2	1.32029	0.7117	0.255114	0.840086	0.840086	GAAGAGATGGTATCGTGAAT;AGCCTGTCACAATACTGTAG;TCAGGACAGACTGATAAACC;GATACTAGTAGTAACTTAGG
POSTN	4	4430;6775;23858;41219	2	1.41749	0.711583	0.20587	0.827033	0.826551	GATGATCGGGAACTACATGT;TAATTGGGATACGAGAGACT;AAAGGCTCACAACAGGCCCG;ATACCATGAGCGCATTGACG
ZNF8	4	4960;6449;12787;52160	2	1.45633	0.711333	0.18908	0.819304	0.816646	CAGTTGAAGGCACACTGTAA;ATTAATTGAATGTGGCTGGA;ACACGTTACTGTTGATGACT;AACCAAAAGTTGATAGAAAC
LCN8	4	3607;7463;26806;60615	2	1.34198	0.711297	0.243143	0.84169	0.838583	GGTACGACTAGGTACAGGCG;GTGGCACGAAGATATTACTC;CTGTAATAAGTGGCATCACG;ATGGTGAACCATAAGGATTG
SDS	4	5167;6341;38389;42819	2	1.46968	0.711106	0.183623	0.817071	0.815941	AGATTTATTTAGTCAACGAG;GTCATTGTCATAAAACACGA;AGTGGTCATAAGGTTACACA;ATCAGTTCAAAGCTGCCGAG
COX6B2	4	757;31032;76686;77209	1	1.42061	0.710307	0.204525	0.827983	0.826551	TACTCACATAGACGGGATGG;GAAGCAAATCTCATGCACCG;GGTTTACGTGATGGAATACG;ACAAAGAACTGATCAACAGT
PTPRCAP	4	758;8396;13724;35367	1	1.42006	0.710029	0.204757	0.827854	0.826551	TTGGCAGCTTATAATCTGCA;GGTTGATATGCATGTGGTCA;ACCTTCGTGAGGAGCTAACC;CTAAGTCCATCATCACGTGT
BAIAP2	4	759;30758;53260;57358	1	1.4195	0.709751	0.205007	0.828336	0.826551	GTGATCCTTAACAGTTCGAG;GCCTTGCTGAACAAGCGCCG;GAAATGCACGGACTGGAGCG;AGGCAAACGTGGTCACCACG
DKK4	4	4991;6471;23584;64861	2	1.45364	0.70972	0.190261	0.817095	0.816646	TATGGTTATACCGGTCCCAG;TATAATTTGGGCGACTACAA;GCAAATCCAATACACCTTTG;TATTGACTAGTATCTGACTG
TMEM8A	4	5785;6078;18360;26242	2	1.50326	0.709676	0.170776	0.809188	0.808072	CGACTCACCTCGATCCACAT;GGTCCGAAACTCATGATCAG;AAGCCCAAAATGGAGTGTCA;CTCCAATTGGATCTACCGCG
TPBG	4	760;18317;28773;54347	1	1.41895	0.709473	0.205265	0.82778	0.826551	ACAGTGACCACGGATCAAGA;TGGTACATGCCATAGAAGGT;AGAACTGCGACAGGATACAG;GAAAACATATCCATTAAATG
ZBTB7A	4	761;8363;10444;39821	1	1.41839	0.709196	0.205525	0.827766	0.826551	CCTCAAAATCGACACCATTG;CGTCAGGCAGATCCAGACAA;GCTCACGTATCCGGCTCATG;CCCAGAGCCCCAGTTCTATG
TRIT1	4	4709;6654;13597;18057	2	1.43166	0.709126	0.199557	0.823253	0.822154	AACATAAATTCTGGGAACCA;CTTGATCCGCACGTAGCAGT;TCTTATTGGCCATGACTGGG;CCCGCAGTAGCAGTAGACCA
SNX7	4	762;22847;52502;56679	1	1.41784	0.70892	0.205784	0.827218	0.826551	CATGTGGATAAAGCCGTCAG;GGTCAACTCTTCCCAGCCGT;CGGCTGTCACAGATGAGGCG;CTGTCGGAAGCTGTCCTGCG
THAP9	4	763;8387;35989;48231	1	1.41729	0.708643	0.206009	0.827064	0.826551	GGGCACGAAGCTCGACGTGT;GGAGCCAGCGCAACACTACG;TCGGCTCAGCCATACGCGCG;CGGATCGGACTCACTCGAGC
GRM8	4	3469;7684;47140;72876	2	1.31938	0.7086	0.255614	0.840408	0.840189	AAATGTTTAGATCTCAAACA;AGAAAGGGATGTGTGTACAA;GTCCCTGGACATTCGCTAAG;AATAACCAATCAGTCAGACC
H2AFB3	4	4223;7004;10683;23251	2	1.39144	0.708596	0.217985	0.831067	0.830415	CTAAGAGGACGAATAGCACC;GCAGCCACCATAGACAAACA;TGAAGAAAATAAGCCAGGCA;AGAATGTGAATTCCAAGAAA
VLDLR	4	3706;7446;11551;32854	2	1.34375	0.70855	0.242169	0.8411	0.838583	ACTTTGGGACTATACCACAC;AATGTATATCAAAACACACG;CTCAGTACACCACGAACCGT;AGTAGAGTATAAGCCTGTGT
CDC37	4	4440;6852;8785;10324	2	1.40862	0.708359	0.209849	0.827671	0.827028	AACAGCCAGACATTACCAGT;TTATGCGACACAAAGGACTG;TATTAAACAGAGGACAAGTG;GAGGTTCCACTGATTAGCAA
SLC35D2	4	5753;6126;14725;34875	2	1.49702	0.708202	0.173072	0.808482	0.808482	AAAGCGGGAATAGAAATAAG;ACCTGACCTTCATTTGTGTG;GTTGATGGACTCTAGAGTTG;AGGACAAGCTCTCGAAGTTG
MMP17	4	765;9544;24434;68227	1	1.41618	0.708092	0.206516	0.826985	0.826551	CCCGCGGTGTCCATGAACAG;CATTGACCACACCTTCAGTG;GGTGGGCCCTCATGTCGCGA;TGTTGACTTCCCTGCATTCG
ATPAF2	4	767;40729;47500;71750	1	1.41508	0.707542	0.206998	0.827859	0.827028	AAGGCCATTCTAGCTGCAGT;GTGCAATTTGCTCCTGACGG;CTCACTGTGATGGTTATTAG;AGATTATGCACTGGATGCTG
FREM2	4	768;25851;44598;57893	1	1.41454	0.707268	0.207258	0.828372	0.827028	GAAAGGAATCCCCCTGCTGG;TGATGAAGTTTCCTATAACA;GCCTCACCTGAAATACTATG;AGATGCAACAAAGTCCAGAG
C12orf45	4	5356;6340;10885;58035	2	1.4698	0.707084	0.183598	0.817537	0.815941	AGCGGCGACACGACAGACAT;CTGGTGTGTCCAGATAGCTA;ATGTCCAGATGGCTTACAGG;ATAGAGTACTCTTCCACCAA
PSMB2	4	4470;6865;7804;17875	2	1.40714	0.707068	0.210566	0.8279	0.827028	TTTGGCGTAGGTGCTGACAA;TCCTTGCTCGATACTCAGTG;CGAGGCCCACAACATTGGTG;ACCTCATAGAATCGGCAGTG
POLG	4	769;28210;47221;53318	1	1.41399	0.706994	0.207514	0.827289	0.827028	AGTGATGCTGAATTTGACGA;GGGTGAAGGAATTTCACACG;ACTGATTACGAGATACAATG;AGACAGAATGATCCGATGAG
DAP	4	4501;6866;17849;38848	2	1.40702	0.706214	0.210596	0.827502	0.827028	GTAGTGTCCATAAAGAAACC;AATTAATTCGTGTAAAGCAG;ACAAAGAGAGAACTAGCCAC;AAGCATAAAATCTATCACAG
FOXK2	4	772;16969;20743;26401	1	1.41235	0.706174	0.208237	0.828073	0.827028	AGATGGGCTGCACTCACGTG;GAATCAGGAGATGAAGAAGG;GTCTGAGTATTTCCCCACAG;TGATGCGCACCCCACAGCAG
ME3	4	4603;6804;34220;63821	2	1.41414	0.705949	0.207369	0.827237	0.827028	CGGAAGTGGCTACCACCCGA;GGAAGGCACCCAGATCCGGA;GACCGGCCAGAGGCGACACA;CTGAGCCCGATGTACCCCAG
IZUMO3	4	773;24645;69755;75393	1	1.4118	0.705901	0.208488	0.828547	0.827028	GGAGCTTTCAATGCTCTCGG;TACGCAGCCAACGTACACCG;TCTTCATGGAGTTGTCGATG;TGGACACGTGGAAGTTGCCG
Non-Targeting Control-GCCGTGTTGCTGGATACGCC	1	3002	1	1.41156	0.70578	0.208545	0.827724	0.827028	TCTCAGTATATCAAGATACA;TTTCTATGCAGATGTTGGAG;GCTCTCAGGAACCTTCGGAA;GCCAAATGTGCATGACCACG
GRHL3	4	774;45031;57682;59921	1	1.41126	0.705629	0.208741	0.827979	0.827028	CAGCCTACCAAGAGGCCAGA;CTGATGTCATATGTGATAGA;GTTTGATTTCATCGATGATC;ATACTTACACCAGGCAGCTG
JAKMIP3	4	775;24789;39718;64501	1	1.41071	0.705357	0.208967	0.827833	0.827028	AGACGTTAAAGACGCCAGGG;AGACGTTAAAGATACCAGGG;CCCCGAGAACGCCTCCAGCG;CTGAGACCCCGACTGCCCGA
PLEKHA4	4	5255;6439;10296;20191	2	1.45755	0.705149	0.188572	0.818795	0.816646	GGTGCAAAAAACGTATACAC;ATAGATCTGAAACATGGAGA;TCCATAGACCTAGAGGACAC;GTTGGCCCAAAGAGTAATCG
CPXM2	4	776;8213;63536;67240	1	1.41017	0.705085	0.209221	0.828313	0.827028	AGGCTGGACTGGTGCCTCCG;GCAGGGGAACCTGCGCCGAG;CTGACCAGGGATTTCCACTG;GTGCCTGCGATAGTCTGCTG
CHORDC1	4	4821;6689;12022;29960	2	1.42753	0.705017	0.201353	0.822564	0.822154	GAGGTGAAGAATGTACCTTG;GCTGTGCACAAGATAGAAGA;AACAAAGCCCAACATACCAG;AGAACTGGTTCAGTTCGTGG
POP7	4	4419;6958;15986;27195	2	1.39659	0.704911	0.21553	0.829763	0.829462	TCTCTATGAACATGTGACGG;TGATGCCGGAATATAAGGGG;TTCCACGTGGCCCTACTAGG;GAAACTTACTCAGTTCACTC
PRICKLE4	4	5632;6259;23064;48784	2	1.47998	0.704869	0.179577	0.812885	0.81249	TCTCCCTCAATGGTACACGA;CTGCGAAGCTAAAACACTCG;CCCTCCCTGGAACAAGACGA;ACATCCCGAGACACGGTGGT
GRHPR	4	777;33515;39343;53879	1	1.40963	0.704814	0.209479	0.828293	0.827028	CCAGGGCGTCGTATACAGGC;CTCCTCTCCGCTCCGCATGG;AGAACCCAGTCCCATACACT;TTCGACACCCAGTACCCCTA
RPL4	4	5410;6372;53137;60395	2	1.46582	0.70463	0.185249	0.816786	0.815941	GTGCTGATCACAATCAACTC;TCAGCGATCAGTGAAAGCAT;AATGTTATTTCTCGGACAAG;GCTCCGGATATGGTGTACTT
C8orf87	4	778;67717;72333;75419	1	1.40909	0.704543	0.209704	0.82814	0.827028	GTCTGTGGGGGAATGAACAT;AGGTTTAAAAGCACCGCTAG;ATAATAAGTGTGATACAACA;GGATACGACATCCTTGCCAG
TNMD	4	780;10418;13322;39697	1	1.40801	0.704003	0.210221	0.828101	0.827028	GGAGGCATTGGTGAATCGAC;AAGATGGGTCCGAAAATGGG;CTTTGCTAGATAAATCCAGC;TTCCAACCTCAGCTCTACAG
MED18	4	5762;6223;26877;46305	2	1.48455	0.703876	0.177816	0.811934	0.811462	TCTCTTCTAGTAGTCTTCTG;TGGAAACACGCATGAGTACA;TCGTAATAAGCCTAATTTAG;AGCTTAACCGGAGATCACAA
TMEM247	4	781;13596;13987;56056	1	1.40747	0.703733	0.210479	0.828078	0.827028	GCTCGCCGCGAAGTGCATGG;GGCTTCCCAATCGTGCCCCG;GTGCTCGACGAGAAGCCTCA;CATGTCCTCACCCAATACCA
UBE2W	4	782;8992;34638;69287	1	1.40693	0.703464	0.210711	0.827435	0.827028	ACAGGTGTATAAAGCGACAG;ACTGAGTACGCAGTGCCGCG;AGGGCGAAGGCATCACCAGT;AGACTGTGGTACGGGCTCGT
OR5A2	4	783;7979;23349;48127	1	1.40639	0.703195	0.210973	0.827432	0.827432	GTGGGCGGCAGAAGTACAAG;CTCCGGCTACCACTATGGTG;AGACACCAGTGCATTCACTG;CCACAATCTCTCGGTCAAAG
TFG	4	786;21294;51331;66007	1	1.40478	0.70239	0.21171	0.828769	0.828369	ACTTACCGTGACCTCGCTGA;TCACGGTCTTGGTCGTCCGA;CCAAGAACATGTCCAAAGGG;AATATCCCGACGTTGTGGCG
COL6A5	4	5136;6576;70901;76817	2	1.44095	0.702213	0.195557	0.821863	0.820508	TGGCTCCCAGGACTGAAAGG;AATGGTCTGGTTGTATACTG;CAAAGACCAGATTTCACGAG;TCTTAAACGGGCAAAACGCA
SAP30	4	788;18296;25057;39643	1	1.40371	0.701855	0.212228	0.829763	0.828463	ATGATGACTGTAACCAGACA;AGACCGAGGTATCCACGTGG;GTGGAGCGGGAGATCGATGG;GAAGCCTGACAGGACCGGTG
FABP4	4	789;33095;53671;75259	1	1.40318	0.701588	0.212452	0.829605	0.828463	TTGGGAACATTCATAAAACC;CTTTCTCCACTAGACACACA;ATTCGGCCAACCTTGGAAGG;CCTCAGCAGCTGCATAACCA
RAD54B	4	790;13166;36885;49573	1	1.40264	0.701322	0.212703	0.829554	0.828463	CATTGTGTGCATGAATAGCA;GTTATTAGTCGATCGAGATG;TGGTGGATCCTTCCGTCCCG;TCTTCATCTGCAAATCCTGT
PDLIM1	4	4027;7365;22604;36984	2	1.35225	0.701251	0.237663	0.837955	0.83717	GGTCTCGGAGAATGACCGAG;TGCATGGGGAGGACCAGTCG;CTTACTAATGAAGTAATCCG;GAGAAAGCAGTCTTTACCCA
DPH5	4	5140;6600;8971;70358	2	1.43808	0.701168	0.196796	0.821573	0.820508	CTGGTACCGCTTCAAAGAGG;GCACCCAGAAGTTCCATGGG;GAAATGGTACAGTCCGTGCG;CCAGCTGGGACTGTTCTGTG
PYDC1	4	791;29109;47334;64625	1	1.40211	0.701055	0.212967	0.829556	0.828463	TTTGTAGGCCCAATCAGGGA;GGCGCCCGCACTTCCCACAA;GCCCGTGGGTGTGCAGAGTG;AGACCTCTGGGGATAAGAAG
STYK1	4	4696;6880;49687;67606	2	1.40543	0.700704	0.211346	0.828374	0.828369	GGCCCGGCAGCGTGTCGTCG;GCTCGTCATCAGCATCTCGT;CTCACCGCGGATGTGCGCGT;GTGAAGACGTTGACGTTGAG
ATP6AP1L	4	793;38900;42906;55656	1	1.40105	0.700524	0.21346	0.828905	0.828465	ACTCTGCGACCTACGGCAGG;AAACACGGCTATTGACCAGG;TGTGTTCTTACCACATGCGT;CTTTGCAAGTCCTATCCCGA
PAQR6	4	3908;7495;26087;58436	2	1.33866	0.700362	0.245018	0.839851	0.838583	TTGAATAATTGATCACAACC;AAATGGGTACCAATCAAACC;CAGCATTGCATTGGAGAACG;CTGACATGGAGCTCTCGTCG
PLCH1	4	794;19907;30703;47073	1	1.40052	0.700259	0.213716	0.828876	0.828465	GAGGTCCTTGAGCAGCACCT;GAGCACAGAGGGCGGCGTCG;CGACCTTGGATCCCACGTCG;CAGAAGGAGATCAACGACCA
CBLN4	4	795;8862;38296;56002	1	1.39999	0.699994	0.213946	0.828746	0.828465	TTACATGATGAGCCATGCGG;TTCTTCATAGAAATCCGACT;TCACCCGAGAGCAGATTGCG;TCAAATTTGTCCGAAGCCGT
UBE2C	4	5626;6380;30095;36560	2	1.46483	0.699936	0.185577	0.815941	0.815941	TGGGTCTTCATAGGACACTG;AAAAAGTAGACTGACCTGGT;ATGAGTGGCCCTGATAACCG;GGTCTGCCCATAGGTTGCAG
MEIKIN	4	796;21358;27726;56256	1	1.39946	0.69973	0.214209	0.828739	0.828739	GGAAGTCGAGCTTTCCACAA;GAATATAGGGTGAATGCACA;GAATAATGTCTTTGACACAC;CAAGCGAAGGGGTAACAGGT
C2orf83	4	798;25469;58723;60236	1	1.3984	0.699202	0.214691	0.829583	0.828801	ACGGATCCTTAAAGCAAAGG;ACCTCCGATACCTAGCCATG;GCAGGCGAACCAAGACACAC;GGATGCTGAGACTCTCACAG
RAD54L	4	4246;7248;25001;50788	2	1.36471	0.699036	0.231213	0.83537	0.833967	TGAATATGCAATCTCGAATG;AAAATATGAAGGACTAACAA;CATGTTTCCCATATCCAACA;GCATATATTCTAGAACCACA
SGK2	4	799;44246;49406;72144	1	1.39788	0.698938	0.214952	0.829063	0.829063	TAATGGATGAAAGGATTCAG;TTATATAAAGCAGTGCCAGG;ATCTCTATGATCTGTATACA;GCCAAGTATCGATACTCATG
LAPTM4A	4	4955;6765;51292;54233	2	1.41865	0.69889	0.205353	0.827602	0.826551	CAGCCCGGAACTCAACAAAG;CTCATCTTGGATCTGATCAG;TGTGCGACACGACTTCTCCA;GCTCTGCGCCAGCTTGACGA
TSC22D1	4	5812;6322;26930;38638	2	1.47205	0.698761	0.182778	0.815622	0.815622	ACGAATTGCAGTATGAACAG;ATGCTAAAATCAAACGAGAG;GCGAGTTCGACAGCTCACTG;CTACCGGCAGTTCATAGAGA
DDIT4	4	801;59308;64412;65652	1	1.39682	0.698412	0.215435	0.830417	0.829462	GCGACGAAAAGATGTAGCCG;TTGGCCAAGACAATGTCACC;TCCCACATCTGGCAGTAACT;AAGTACACATCCTGTATGTG
ABHD13	4	802;39193;58074;62449	1	1.3963	0.69815	0.215702	0.829916	0.829462	AGGCTGGCTGACCTTAACGA;CAGCAAGCTATGATGCCCTG;CCAGCTGGAACCGTAAGGTG;TGAAATCAGCCAGTGCAGGG
NNT	4	5234;6634;18643;21854	2	1.43403	0.69776	0.198531	0.821178	0.820999	TATTCAAAGTTGATGTTGGA;TGCCGGGCTCCTTGTGACGG;ACGCACAGTACTAGGTCAGG;TGAATGCTAGAGCGTGCTCG
RFC4	4	805;9193;11457;51824	1	1.39473	0.697365	0.21644	0.830724	0.830415	ACTATATTGACAGTTCACTA;GCACACACAAAGTCTCTCAT;GGCTCGGCCTACATTGAGCA;GCGCAAGCGACGGCCACATG
KCNE1	4	806;7809;32965;34040	1	1.39421	0.697104	0.216696	0.830691	0.830415	ACCGGAATCTCGATGAACAC;GGAAATACTACAGTAATCTG;AGAACCACAACTGTCAACAT;ACCAACGTATCCTTTATCAG
ZNF600	4	807;22222;57805;66859	1	1.39369	0.696843	0.216931	0.831085	0.830415	TGAACGAGAAGAACGTGTGA;AAACTCAATCGGGCAACAGA;AGATTACGGATGCTGCATTG;TGACACAAATGGGCATGTGG
ZNF697	4	808;34137;34151;46397	1	1.39316	0.696582	0.217186	0.831048	0.830415	CAGCTACCAGTAATAATACG;TTTCCTGAACTGGAAACCAA;CGTAGGGAAATAAAATCCCA;GAAGATCACAGGGATAGGGT
ASIP	4	809;44747;56891;60556	1	1.39264	0.696322	0.217441	0.830507	0.830415	GGGCAAACACAGTTTACCAC;GAAATTGTTTAAAGACCCGT;GATTCTGATCGATTGCGTCG;CCTACGCCAACAGATATGGG
HAUS4	4	5664;6456;13418;34283	2	1.45547	0.696072	0.189386	0.81837	0.816646	AGGATGAGCCGTAATACTGG;ACACTGACCGTGCATCTGGT;ATTTGCATCCAGATACGGGA;CCTTCCACACCAGCGAAAGA
C10orf105	4	810;11248;18552;76208	1	1.39213	0.696063	0.217664	0.830852	0.830415	CTTCTGTGAGCTCATTGCGC;TTATGATGGGAAAGTACACG;TTATCAGAAGGAAATTTCCG;ATGTTGGGGGTACATTCAGG
C11orf42	4	811;31383;35920;36631	1	1.39161	0.695803	0.217928	0.831355	0.830415	TACCACAAATGTACCCACAA;CTCGGCAGTCACGTTCCGGT;ATGAAGCCTAGGGGACACCG;TCATCGAAGACAGACTCTTG
HOXD13	4	812;13858;25252;34140	1	1.39109	0.695544	0.218187	0.831334	0.830415	CCTGAAGAAAAGCATCCACA;GTAGGTGAAAGGATGGACGA;GGTAACATGTGGACTGGTGT;ATGTGAAAAATGCTACCATG
POLA2	4	4740;6989;13759;35659	2	1.39312	0.695513	0.217213	0.830646	0.830415	GGTACTCGATGAGGCTCCAG;CATCGTACTTCTCTCCCAAG;TATGGAACCACGGTTCAAAG;TCTTAGAGAGGCCCTCAATG
RNASEH2C	4	813;8916;36443;44818	1	1.39057	0.695285	0.218415	0.831194	0.830415	TCTCATAGTACCCCACACGC;GAAGAGCCCACCTGTTGACA;CAGGCCTGGGAAGTGAACAA;GGAACATTGGTGTGCACGAA
ATP6V1D	4	4028;7537;17895;45265	2	1.33433	0.695249	0.247293	0.839862	0.838583	TGACTGTCAAAGGAACCCCA;ACTGTGGTGGCATTACTGAA;GGTGTGGGCTCTGATATTGG;CAGGTTAAAACTAGACACAA
DGAT1	4	814;11646;31138;75470	1	1.39005	0.695027	0.21867	0.83116	0.830415	TGTGGTAGGCTTGGTCATGC;CCTGGGCACCTGGAAGCTAG;GATGACTACATGAAGTCACT;AGAGATCAGCTTTAAGTTGG
ZKSCAN4	4	4842;6941;48712;75609	2	1.39851	0.694839	0.214578	0.829657	0.828801	TTATATGAAAGAAGTAGGTA;CATGATCATCAGTGTGAATG;ACTGAGATTTCCTTCATACT;GACACCCCCATCTAAGGTTA
NCR2	4	6220;6242;11074;73561	2	1.48214	0.694782	0.178783	0.812216	0.812175	TTTGCGAAAAATGGGCGCAA;TGGCGCCTGGTGGACAGCAA;AGCTGATGGCAGAAAAACTC;ACTTAACATTCTACAGGAGT
ATP10D	4	815;34892;45499;71713	1	1.38954	0.694769	0.21893	0.831642	0.830415	TCTCAGCACATTCAAGAACA;TCTTGACTGATAATTACCGT;GGCTTTGCCACTAGGCAGGT;CTCATCAAAGTTCTGACTGT
MGAT5	4	817;65906;66026;71426	1	1.38851	0.694254	0.219404	0.831933	0.830415	TGACGTTAAATGCTGCACAC;GCGCGTCGACGACTTCGAGG;GAGGCATAGGAACTTGAGCT;CACGCTCTGTCAGGTTGCGG
L1CAM	4	818;54011;54891;66255	1	1.38799	0.693997	0.219632	0.832298	0.830415	GGTGACTGAGAGGCAGACAA;TATGACAACGGTTTCCCCAC;CCCAGGATCACTTACAAAGA;CCTGGACATAGTCCTTGACA
DDO	4	819;31423;52792;72270	1	1.38748	0.69374	0.219896	0.832294	0.830415	GGGACGGAGGCGCTCGCTCA;GCGAGAGCCAAGGCCCGAGG;TCCCAGGAATCCTGAAAGAC;TGTTCCCTCTCTTCGCGGAG
ABHD14A	4	821;43896;70934;77330	1	1.38645	0.693227	0.220383	0.832131	0.830415	GAAGCCTGCATTGTCCACCG;CACGAACCAGCGCCGGTGGT;GTGCCAGCTTCGACTACCTG;TGAGAGTCAGGATGCCATGG
POMT2	4	5288;6720;29742;73782	2	1.4239	0.693222	0.203043	0.82464	0.824337	TCTCCAACTCGCGTACCACC;TTCTCCTTTGAGAGTCGCGA;GACTCCCCAGCGGACCACAT;GCTCGGTGGTTAGGAGCCTG
AK8	4	822;17574;40394;50977	1	1.38594	0.692971	0.220642	0.831609	0.830415	GCACTGTGCGGCGAGTCTCA;TTGGAGCGTTGCAAACCCGG;AGCCCGGAAACCGAGCGCTG;GGCTGTCACACAAGTCGATG
ZBTB24	4	824;18192;25863;55867	1	1.38492	0.692461	0.221136	0.831478	0.830415	CGGGGGCGATCAAGTGCCCG;GATCGCGCCAAGTATGTGCG;CAGAAATGCGAATTCGTGCG;TGGCGCGCAGGGCTATTGCG
SLC1A1	4	826;36951;50886;60147	1	1.3839	0.691951	0.221638	0.832368	0.830415	AAGAGCCACAACTAATACCC;GCATGTAATAGATAGCATTG;TGTGTTGAGAGAACAAATCG;GGGAAAATGTAATGACCACC
ATP6V1G1	4	6148;6345;30921;39755	2	1.46918	0.691709	0.183848	0.816336	0.815941	GCAGCACATCCGGAGTCCTG;TGTTTGGTAGGTCCTTGAAT;GGCCTCTACACGGACCCCTG;CATCTTCCGGATCAGATCAT
GABBR1	4	827;15672;20349;35664	1	1.38339	0.691697	0.2219	0.832357	0.830415	AATGCAGATAAGCCAATCAT;ACCAGGGGATTCGGAAAGGT;GCAGCGCTCCCCTAATCCAT;CTTACACACTTAGAACTCGG
CD177	4	5463;6667;51270;76621	2	1.43012	0.691639	0.200276	0.823516	0.822154	CCACATAATCGCAGACCCAG;GCTCGCCTATGTCCCTCACT;ACGGGCCGGATGGCCCAAAG;TCTACCAGCTGATTCTCCGG
IPO11	4	4745;7092;16300;36008	2	1.38168	0.691578	0.222704	0.830415	0.830415	AAGCTCCAGAGAATGCCCCT;GTGAAAAGTCCCATTCCAAG;ATGCATGGATTGGGTAGCAG;ACTCTCTCCAGCATTCGCCA
RPS3A	4	4177;7517;16254;69406	2	1.33639	0.691559	0.246239	0.839914	0.838583	TGAGCTCTATCGTAGCTCAG;TATGGTGCAACTTCTCACAG;AGCCGAGACAGACAGAGTAA;GTTATGCAGCAACTTTACAC
PLXNB2	4	828;15742;26525;50189	1	1.38289	0.691443	0.222156	0.832325	0.830415	AGGGATCTCACGGAGCATGA;GCCATCGCTGAGGTCGGAGT;CCCTGGGACACGTAAGAGTG;GCCCTGCCACTCAATCATGT
RXRB	4	4103;7585;9410;43608	2	1.32941	0.691383	0.24998	0.839009	0.838667	CTCGGGCCGCACTCCCACCG;GAACCTACCCACAAGGGACG;CCTCACGCAGCTCATCCGGG;TTCAAGGGGTCCGCACCCTG
RNF111	4	829;13747;30307;61124	1	1.38238	0.691189	0.22238	0.831675	0.830415	GGGGGCCGTGAACCGACCCG;CATGGCTGAACTTTGTCCGG;GTCCGCTTGTCCACCCGGCG;TCCAGGTGCAGAAGTGACCG
Non-Targeting Control-TAGAGTGCATAAGAGAACCA	1	3212	1	1.3822	0.691098	0.222442	0.830916	0.830415	GTGTTTCACAAATACCAGGT;TTTATGTAGGATAAGAAACA;AGAAAAGAAGAAATCTGGTA;AAAGAAAAAGAAAGGCTCCA
POLR2E	4	5607;6610;25124;56694	2	1.43688	0.690995	0.197307	0.820979	0.820508	TCCCACACTCAAGATACCTG;ATGCTCGATCCCACAGTCGG;CGGGCACGCTGAGCAACCGA;TCATTGTGTGTATTGATCAA
OR2AG1	4	830;25436;51854;61290	1	1.38187	0.690936	0.222645	0.831182	0.830415	GTCAATGTAGGTCAGCACTG;AAAAGGTAAAGAGCTAATGG;CATGCCTAAAGACTTGAATG;GAAAGGGAATAGATCAAGAG
MMS19	4	4162;7554;9387;11932	2	1.33259	0.690723	0.248243	0.840362	0.838583	AAAGCCTGGGCTTGAGCCAG;TGCACCGGAACATGAGACCC;GCATGGTGCACCGGGCCAGG;CTGGTGCACCTGCTTCATGG
LRRC16A	4	832;33637;70949;73622	1	1.38086	0.690431	0.223129	0.831507	0.831507	ATCGGCTGTTCTGAGTACGA;CATAGGGGGCCATGTGATCG;GGCAGTATCGACATTCACAT;AGGCCGTGCCTCTCCCAGAG
GRB2	4	5795;6540;7812;11098	2	1.44527	0.690156	0.193751	0.821413	0.820508	GAGTAGCAGGGGAGACCCCG;CGCCTCTCGAGGCCACGCGA;CGCGGGCTAACAGTCCGCTG;AGGGCGTTTCAAATCGATGG
TMEM44	4	835;21624;70813;73244	1	1.37935	0.689674	0.223896	0.832389	0.832007	CCGTCGGAGCCACTCAAGGG;CTACTGAAATTCCAGGCAGT;GCTGTCCACTCCAGATATGA;CAAGCCAAACCTGGACCAGG
RASSF1	4	836;44319;60744;63922	1	1.37885	0.689423	0.224123	0.83225	0.832061	GGGGGTAGGCACTTCGCACA;TGGAAGGTAGGATTCGCTCC;GTTCCCTATGCAAATGCCAA;CGTCATCCACCACACCACGG
EDC3	4	4096;7650;72671;77395	2	1.32281	0.689388	0.253667	0.841494	0.840086	AAGAAGAACCTGAACAGAGA;GTTTCCACTCATACTCGAAG;TACTGCTATGACACAGGAAT;CAACACCTTCAACTTCCCAA
RXRA	4	4309;7475;9794;19342	2	1.34074	0.689287	0.243846	0.840881	0.838583	ATGAACACGGTGTCAAAGAC;GGGTTACCTTGGTACATGGC;AGGAGGAAACACTGGCACCG;AGGAACAAGCTAAAATCCTG
PTPRO	4	4060;7687;47203;76262	2	1.31908	0.689209	0.255823	0.840217	0.840217	GCTGGCGGCCGTGAGAAACG;ACAATGCCTATGTCGCGGCG;CCGGGAGCTAAATTCCTGGG;GGCGACGCCATCAGTCCCCG
YES1	4	838;28886;55617;72263	1	1.37784	0.688921	0.224612	0.832099	0.832099	GGCAGCGGCGGTAATGTCCG;GACGGACGATCACGGAGGGA;GCGACAAGCCCATGACCCAG;CTGTTGCTGCCTGAACTAAG
NR4A1	4	839;24962;28654;69691	1	1.37734	0.688671	0.224863	0.832536	0.832259	GATGGAAATGCGGGTCACCA;CCGAACCCGAGCGCGAGTCG;TGAGGGTGGGTAGGTCGCGG;CCTCAAGGCAGCCGTGATCG
SETD2	4	4226;7562;14555;33097	2	1.33177	0.68862	0.248717	0.839702	0.838583	AAACCTACCGGATCAACAGT;GCTGCTACATCAACTCTCTC;ATATAGATGAGTAACGAAAG;AATGGCATATTGGTACTTTG
SDE2	4	4946;7043;17210;29486	2	1.3871	0.688581	0.220014	0.832238	0.830415	CATGGAAGAATATAGCACAG;TTCGTCCTGCCCAAAATCGT;TCTTCTCTAGGTCTAACTGC;GCAGTACTTACTAGAAAATG
MSANTD4	4	840;21071;27445;44326	1	1.37684	0.688421	0.225123	0.832519	0.832259	GGATCTGCGTGCTGATGTGG;CTGGCAGCTAACAACTACCC;GGACATCACTCCAGACCAGT;ACTCACCTTGTGGTCTAGCT
YEATS4	4	841;15079;20964;53689	1	1.37634	0.688171	0.225357	0.832404	0.832404	GAACCGTCACAGCTCCTGCG;CACATACTAGACACCCGCCG;GCACCGGGTCTCAACTCGTG;TACCTGCGGTGCTCACGTTG
SOX17	4	5894;6545;38600;51246	2	1.44467	0.688103	0.194003	0.82082	0.820508	GCAGGTGTAAGCTGAACTGG;AATGAAGCTCGACTTGACGA;GTGTCTTACTGCCAAAATTG;GCAAAATTAAAGCTTTCTCA
C9orf47	4	843;48121;57568;72592	1	1.37534	0.687672	0.225841	0.83321	0.832843	GCTGTTGTATTACAATGCTG;AGAGCATCCCAGACATCCGC;GTGGAGCTGCTCTACGAGGT;GGACCTCTTTGGCCGGTGGG
ATP6AP1	4	5867;6570;8360;18328	2	1.44166	0.687602	0.195273	0.821769	0.820508	GAACTAGCGTCCACACACCC;AAGTCCCAAGTGCTAAGAGG;GGGTTGTAGTCACACCAGAG;CCCATGGACAGCACCAGCGT
SLC30A10	4	844;20796;44981;57090	1	1.37485	0.687423	0.226108	0.833708	0.832843	ACTTGCGATGGTCCACGGAG;GGTGCTGAGGAACCCCTACA;AGGGAGGGACCTCCCTATGA;AAGTATTCCCGGCTCCCGCG
RGS1	4	845;22510;54405;59805	1	1.37435	0.687174	0.226343	0.834082	0.832843	CTTGCGGGAACTGTACCTCA;TGAGATTCAGAAACCTGGCT;AGAGAAGGTGATTCCAGATG;TTCTAGTTCATACAGTCACC
JADE2	4	846;19117;19253;27974	1	1.37385	0.686926	0.226607	0.834077	0.832843	AGTGAAGCGACTAGAAGACT;ATGATGCTGCAGGAGTGTCG;GCAGTGCACCAGCAACTACA;CTGGATGAAACTTCGCCGAG
HIST1H2BL	4	4527;7378;10765;31625	2	1.35088	0.686819	0.238398	0.837727	0.83717	AGAGAGTGTACAGATTATAG;GCGAAAGAGAACGTAGTCCA;TCTGCCAGCATCACGTACAA;CTCGTGCATCTGTGAACGAG
CLINT1	4	847;8141;9144;41505	1	1.37336	0.686678	0.226868	0.834061	0.832843	TCAATCGTGTGAATGGCCGG;TCGGCGAGCTCCTGAAATGC;GACCCAGGAGACCTACACAG;AATGTCCGCTTTGTGTCCGA
LOC101928093	4	848;43439;45329;76000	1	1.37286	0.68643	0.227104	0.834439	0.832843	GTCTCCAGAGTCGTGTACAA;GGTGTGGAGCGAGACCTGCG;AACGTCCGCTTCATTTACGA;GATCTTCACCCCAGCCCACG
LYL1	4	850;9203;10511;17605	1	1.37187	0.685936	0.2276	0.833826	0.832843	GCCCTGCTGCACAAGCACTG;GGTCGAGCGGAACTGGAGCA;CTCTCACTCACCGTCCACGC;CATCGAGGAGCGCTCCCAGA
PGS1	4	4533;7405;36326;40521	2	1.34804	0.685717	0.239909	0.839281	0.838583	AAGTGACGCTGAGTCAAACT;CGTCCTCAAATGAAACCCAG;ATATCTATGGGAATTCCAGA;AGCACAACCTCAAGATTCAG
DEFA1B	4	851;48612;50963;73753	1	1.37138	0.685689	0.227862	0.832843	0.832843	GGCTGCCGTGAGGCCGAAAG;TTGTTGGGGACATTAGGACT;AGTGTCACTTCCGTCAGGAG;AGCGTCCCTTCCATCAGGAG
KCNC2	4	852;32593;66246;72839	1	1.37089	0.685443	0.228105	0.833246	0.833246	GCAAACTTCTGCAAGACATG;AGGCCATGTTCAAACCCATG;CACAGTTGTGAAACCCAGTG;CATGGCGGTTAATACCCAGG
LUZP1	4	853;68009;71951;74736	1	1.37039	0.685196	0.228372	0.833737	0.833737	TCTCCAGCGAGTGGGACGAG;CGTACCGGTTGATACCAATG;CCAAGGACACCTACCCACGC;TTTATTTCTCTGACTACGAG
SCAMP2	4	4729;7281;19356;49755	2	1.36117	0.685136	0.233006	0.834174	0.834174	TGCTTGGAACCACATAATGC;ATACAATGCTGAATCCAAAG;GGAGTCCTTCGCCATAAGCA;TGCTGCCCAGTGTGTTGCAA
ZNF197	4	854;14745;50921;59983	1	1.3699	0.68495	0.228604	0.834098	0.833967	GCACCAAGTTTCCATCCCAT;TCGACAGCCTCTGGTGTTAG;CTCTGCCACCCTCCCAACAA;GACTTGCCAGAACTGGAGAA
HTRA2	4	6175;6501;19301;21606	2	1.44999	0.684843	0.191767	0.818527	0.818527	GGGCGTCCCCCTCTATGCAG;ACCAAGGACTTTCAAAGCAA;ACCATGGGGATGTGGTCCAT;GAGCTGTGATTATGGCCGTG
GPBAR1	4	5879;6637;18803;31956	2	1.43367	0.684715	0.198618	0.820999	0.820999	AGAGCTACGCTCCGTCCAGT;GCTGTGGCCGGGACCGAGGG;CAGGTAACGCTTCTGGCCTG;GTGAGTAACGGGAGCTAAGG
RAB21	4	855;10571;23988;31286	1	1.36941	0.684705	0.228866	0.834571	0.833967	CCAAGAAGTCCTCCCACTCG;ATAGACTTATTCAGCTTGAG;CAGTGTGAAAAAGCAAAGGG;CAAATGCATAATGTGATGGG
DCAF5	4	5579;6787;48993;53965	2	1.4161	0.684624	0.206539	0.826551	0.826551	TCTCTTTGCTCAGACATCCA;AGACCTTATACGCTGACCGG;CGACCACATTCGTCCAACAG;GAAAACGATTCGCTTCTCCC
MED14	4	6349;6437;17561;23245	2	1.4578	0.684485	0.188517	0.819124	0.816646	TCCGTGTCAAGGGCTACCAG;GTGAGGAGTAGCCTTTATTG;GGAGACTGTGACGCCCGGGA;GTCTCCGTCAGAGATGGAGG
USP17L22	4	5541;6811;19904;22450	2	1.41333	0.68446	0.207787	0.827854	0.827028	ACTTTATAACTCCAAACGAG;TATATACCTCCATAAAACAA;GAAAAAAGCACAATATGACA;ACCCTACCTTCAGAAAATTG
VWA8	4	856;45131;59045;67696	1	1.36892	0.684459	0.229096	0.834442	0.833967	CCGCACCGAGAAGGCCACCG;TGCCGTGGAAGAAGTGGTGA;AAAGAAAGCCCAAGAGTCAG;GGAGGTGGTGGGACACGCCA
ADH6	4	857;8127;72531;76871	1	1.36843	0.684214	0.229361	0.834923	0.833967	CGCACCGAGAAGGCCACCGA;GGAGGTGGTGGGACATGCCA;TGAAGCCATAAAGAAAGCCC;CTGTTCAGTTCATGCCGTGG
DBNDD2	4	4378;7574;14066;65428	2	1.33054	0.683998	0.249421	0.838926	0.838583	AAAGAAAGCCCAGGAGTCAG;GTCCTCACTGGCTCCCTCGG;TGCCGTGGAGGAAGTGGTGA;CCTCGGTGGCCTTCTCGGTG
TNXB	4	5133;7059;22578;32529	2	1.38532	0.683739	0.220935	0.832213	0.830415	TCGGCAGCGAGCATAACATG;TTCTATGAATGTGCCATGAG;TTCAGTTCTTCATTGACGGT;GGGTAAGCCCAAAGAGTGCT
FAM219A	4	859;24691;35020;58262	1	1.36745	0.683725	0.229859	0.836252	0.833967	GTGCAACCAGGCCAAGGCGT;CGGGCACTGGAATGCCACGG;GGTGTGCACGCAAATCAGCG;AACTAACTGGAGATAGGCAT
SSX7	4	860;56459;57297;64603	1	1.36696	0.683481	0.230124	0.836246	0.833967	CAGAGCTGGGAGTGACCAAG;GCCTACGAGCAGGTCCAAAA;GGGAACGAGCAAAAAGAACG;AAGGGACCCCTGAAGCTGAA
Non-Targeting Control-GTGCGATGTCGCTTCAACGT	1	3327	1	1.36692	0.683459	0.230124	0.835764	0.833967	GTATCACCCCAAGATAGAAG;TTTGATGGAGCCAGCCAGGT;CCTTCACTAGGATATTGTGT;GTGCACGTAAGAGTGAAGGA
TACR3	4	862;13490;22391;60606	1	1.36599	0.682994	0.230628	0.835659	0.833967	TGAGTCACCAGACCAGTGCA;TCACGGTCCCAGGTAGACTT;AGATTCAGGTAGAGCGCTAA;TCATCGTGTGGAGCGCATCA
USP17L26	4	5548;6848;11839;28093	2	1.40908	0.682903	0.209735	0.827741	0.827028	GAGGCAGATCAAGCTGCTCA;GTAGAGCGCTAAGGGATGTG;GTCACCAGACCAGTGCAAGG;CAACTGCCGGCTGTGCAGAG
SF1	4	4824;7279;29673;52804	2	1.36139	0.682896	0.232944	0.83443	0.834174	GCAGACCTGCAGGCTTACAA;TCAAAATCCAGGAAAAAGTG;CTTCAGCTCATCGAATCGAA;ATAGAAGAGGGACATTCGAT
ZNF816	4	863;30122;67299;68644	1	1.3655	0.68275	0.230861	0.836022	0.833967	TCTCGCTCTAGATGCTGGGT;TATGAGGATTAACAATGTAC;AGCTGGCCACGAAATACGAG;CCAGCCTACAGAGTCTGAGA
OR8K5	4	865;22861;38901;76488	1	1.36453	0.682265	0.231351	0.835389	0.833967	GATCTTACCCAAAACAGCTC;GTCAGTGAATCGAGAACTGG;GTAACAAGGAGATTGAGCTG;TCTTCCAGGTGGTAGATGCA
KLHL36	4	867;42850;47614;49812	1	1.36356	0.68178	0.231856	0.835292	0.833967	AGGTCAAAGACACTGCACTC;GTCAAGTGGATCCCTTGGAA;CTGTCAGCTCACACAGTCCG;AGTCATCCCTGAAAACCATG
WFS1	4	4546;7513;20999;63784	2	1.3368	0.681635	0.246013	0.839597	0.838583	ACCTTGTACTGCCCTCTCAG;TAGCTGCGAGTTCAATAGTG;CAGGAGCAAAACATTGAGGA;GAGGGTCTACTAACCACCCA
CEBPE	4	4297;7710;32939;68919	2	1.31677	0.681631	0.257088	0.841733	0.841032	ACTATAGGTAGAGCCTGTAG;GACTAGGCCCATACCACTGG;GTGTAGGAATTGGAGACTGG;CGTCAGCGCTGGAAACTACG
CWF19L1	4	868;50332;67379;70288	1	1.36308	0.681539	0.232121	0.834332	0.833967	TCGCCGACTTCTTCACGACG;TGGCTGGAGGAACTTAGGAG;GGAGAAGCAAACGCGCTGTG;GATGACGCTTTCAGTGATGA
USP17L17	4	5500;6912;24219;25383	2	1.40179	0.68144	0.213054	0.828865	0.828463	AGGCTCGCTTCTCATATGTG;ACCTATACAGAATTATGCAG;CTATTTGATAAGCCAACTAG;GGTTAATCTCATCTTGACGG
ARHGEF6	4	869;17482;58098;63836	1	1.36259	0.681297	0.232358	0.834232	0.834171	CTGCAGCGGCAACTGTACAA;ATAAAGTCGCTCTCAAACAT;AAGATAAAAAGAGCGGCCCG;GGTGTTAAACATGCCCATTG
R3HCC1L	4	870;58047;71256;76274	1	1.36211	0.681056	0.232621	0.834699	0.834171	AAACAAGTGCTCAGCTCTAG;GCATGACTTACTTGGTAGGA;GTTTACAGAATTTGCAACAC;CCAGAAGTGTCTGTTGTTGC
SUCLA2	4	5736;6802;20709;34998	2	1.41437	0.680979	0.207316	0.828078	0.827028	AATTAGGATCAGATGCCCCA;TTCAGCCTGTCTATTGCGAA;AGGATATTCCTCGCTGAGAG;AAAAGAGCAGCATCAGACAA
MGAT4B	4	5336;7025;37939;42138	2	1.3891	0.680603	0.219036	0.831042	0.830415	CTGTGGTGTTGCCGTACCAG;GCCCGTCAGCGAGAGCAACG;CATCCCCAAGAAGGAGACTT;GGAGGACTCATCGATGCTAG
ARHGAP32	4	873;38081;51796;61915	1	1.36067	0.680334	0.233349	0.834926	0.834308	CTTCTACCCCAGTGTGACAT;GAGACCAAAGTTTCACGACC;CAGATGGGGTGAGCTACCCT;GATGGGGGGCATGACCACGC
COTL1	4	6233;6592;12279;76952	2	1.43903	0.68019	0.196341	0.82131	0.820508	ATTCAATTCTCCAGTTACGT;TCAGAGCCCTATTAAGCAGG;GTGATGCCCGGACTCTTAGG;ATCGTTGAGGCATCAACTCG
KLF17	4	4497;7609;45844;74717	2	1.32697	0.679634	0.251396	0.840618	0.840086	CCACCTAGAACATGCGTGTG;TAGGAGGAGCGACCCATAAG;CAACTGTCAGACCCTAACCA;GGTCAAAGTCTTCCACGATG
CNEP1R1	4	876;30225;31584;67282	1	1.35923	0.679614	0.2341	0.835711	0.835711	TCTCGGGTAACATACTGCGG;TGAAGGCAGCCTTCTCGACG;GGGCCTCATCCTTGATACTG;GTTCCTGCGCGTACGGACTG
CNGA4	4	6392;6543;8289;24027	2	1.44491	0.679475	0.19383	0.820641	0.820508	AGTGGTCTCGGAAAGTTGTG;GGACGCTGAGCAGAGTCCTG;TAGATTTGATTAGAACTATC;AGAGTCGCCAAAGAGCAATG
GORAB	4	878;24800;32759;74761	1	1.35827	0.679136	0.234591	0.836987	0.836676	GGAGCATCCACTGACGCTAG;TAGCGACCCCGAGAGTACAG;GATGGACAGACCAATAAGGG;TTGATGGAGCGAATCAGATG
ALDH1L2	4	880;23167;60378;62306	1	1.35732	0.678659	0.235074	0.836811	0.836811	AAGGTCCAGAAAAATCATGT;ACCCAAGACAACGATTACAA;GTTTCATTAACATTCGTCGG;AGAAGAGCAAGCCCTTACAA
ZMIZ1	4	881;25197;57434;59176	1	1.35684	0.678421	0.235312	0.837182	0.83717	AGACGCATACTGACCACTCG;CCTCCACTCACAAGATCGTG;GACACACAGAACCTTCCGAG;GAGCCACGGGAACACATGGT
TCEAL3	4	882;35344;54415;54715	1	1.35637	0.678183	0.235576	0.837646	0.83717	TGACGGTGGTTACAACACGC;AAAGAAAACTGAGAATAACC;AGGTCATTTACCATGACCTG;AATACAACAAGGCATAATCG
TAAR6	4	883;25846;28120;45160	1	1.35589	0.677946	0.235813	0.838018	0.83717	CATATGTTGCAGTCTAATGC;TCACAGCATTGAATTATACT;GCTGTACAGATTTCGCCTGA;CTGGGCAGCAACCATCAGAG
ERVFRD-1	4	6169;6678;14377;27910	2	1.42883	0.677893	0.200813	0.823571	0.822154	ATGCACTTGTCTGCTACGGT;ATGAACGAGTATGTTTGCAG;ATTACGGCTTATCACCTGAT;ATCTATTTGAAACAAAGACC
C6orf106	4	6125;6698;32845;40371	2	1.42648	0.677877	0.201847	0.822443	0.822443	AGCACTAATCCTTTCCACTG;ACAGACACCACAAGAGCGAG;CAACTGGCACCAACAATCGA;AATATGCTTGCGATTACAGT
SDAD1	4	4689;7518;12359;29651	2	1.33629	0.677832	0.246271	0.839565	0.838583	GGAGATCATATCTATTGGCA;TGATGATGGGAGGCATTGAA;GTCCAAATCATGGGTACCAA;CTCACAATATTCACTGAACA
LMO4	4	885;62393;70242;73977	1	1.35494	0.677471	0.236325	0.837942	0.83717	CGAGACCCCGAGACACTCGT;GATGTATTCAAATGACTCAG;CATCTCCCCACTCATCAAGT;TTCCATCCTACGCTCCGATG
OR6S1	4	886;12023;21441;58396	1	1.35447	0.677235	0.236561	0.838304	0.83717	TATCTAGTAGCAAAGTACTG;ATTAATGAATGACGATACCC;ATCCCCACTTCGTCCAAGTG;TGATGGAATCCAAATCAAGG
FAM122B	4	889;42232;63746;68939	1	1.35305	0.676526	0.237314	0.838607	0.83717	AGACGGGACTTATCACGGTG;TTTAGTTATAGGATCATCGG;ATTACTGGGACTAACAACCA;AGTCCACCCAGAATCATGTG
Non-Targeting Control-CGGGACGTCGCGAAAATGTA	1	3436	1	1.35292	0.676459	0.237346	0.838249	0.83717	TCTCGCTACCGAATTCAGGT;GGAAGGTGGGTAGCTCACGG;TGGGGAAAGATATCATGCAC;TCTTGTTCTACTATTCACAC
GPR182	4	890;15034;23971;67972	1	1.35258	0.676291	0.237545	0.838481	0.83717	AGACGGAAGTGACTTCTTGG;AGCTCATCGAGAGTGCACAC;AGTAGGTTCTTCGCAGACAG;AGACATGCGCAGAGACCACG
KLRC4	4	891;18050;42074;76515	1	1.35211	0.676055	0.2378	0.837969	0.83717	TCTGACAGATAAAATCGGGG;GCATACATGCATCAACACAG;AGGCTGGCGTTGTCACCGTG;AACCCGTCTTGCATTCGCAG
CCDC86	4	5953;6831;13801;22906	2	1.41103	0.675807	0.208799	0.827687	0.827028	AGTAGGGCCCTCGATACACA;GCTGGTTCACACACTCATGT;TGAATGCCGAACCATCCCCG;ATAAGAGGCCTGGAGATCGT
S100A16	4	893;11765;52748;63571	1	1.35117	0.675585	0.238306	0.837871	0.83717	AGTGCATGCACATCGATTTG;TATTTGGATATTCGACCTCG;TTTCTCCTTACCGATACACG;ACGTACCAATACACTCCCCA
C16orf45	4	4570;7674;45185;46824	2	1.32039	0.675544	0.255083	0.840422	0.840086	TCTCGGTGTAGATATTCGCA;GAATGTATGATAATGAACGG;CGGACTTGGTCACTGCACCG;AGATGCGGGTATCCTCGCTG
MAGOHB	4	5680;6976;16011;65254	2	1.39457	0.675461	0.216494	0.830424	0.830415	TACCGCTGCGAGTGTAACGT;GATGGGCTTTGACCCCACCG;CGGCCACTGTACCAACACCG;GGGTACAAACTGTCGCCAGG
SLC35B2	4	894;44608;57838;74510	1	1.3507	0.675351	0.238544	0.837772	0.83717	TCAGGCAAGAGCTGAACACG;CAGGATGGAAGCGCTCAGTG;GCTCTGCGCATGCGGTCTCG;TCTTCACCAAGGGATTGGCG
CBX3	4	897;26941;31481;47622	1	1.3493	0.674649	0.239318	0.839081	0.838583	TGTGACAACATCAGTGACAC;CGATCTCCTGCACAAACGCG;CTCTAAAGCACATCTCCCGA;CCGCCTACCACAAGTCGGTG
TMPRSS6	4	898;47339;52319;73744	1	1.34883	0.674416	0.239558	0.839454	0.838583	GGACCCGGTTCAGGACGTGT;TCACGAATGGCTGTCAGACG;CCTCTGCGCCAGGTACACGA;CCGCAGCAGCCGGGCCAATG
PRELID1	4	4976;7424;49434;62274	2	1.34605	0.674203	0.240933	0.839124	0.838583	GGCCGCCTGACAGGGTACAG;TGAACGTCCGGCGTACCTGT;ACTTTCTTGCCAAAGCCGCG;ACGCTGTTCACTCCCTCCTA
GFM1	4	899;36090;42737;49294	1	1.34836	0.674182	0.239789	0.839328	0.838583	AGAAGCTAGAGCGTTTCAAG;TCACCCTGGTAGGTGAAAGG;CTGTGTGCGAACTGAGTGCG;TGCAGATTGTACACTCCATG
FZD5	4	6396;6680;19035;54607	2	1.42859	0.673969	0.200876	0.822752	0.822154	ATTCTTAAAAGGCTGCACGC;ACATGTCTCTAAAAGCTCTG;AATATTTCAAAACGATGTGG;AGAAATGTTTACCTAAGCCG
LZTS2	4	901;73865;74693;77088	1	1.34743	0.673717	0.240279	0.839172	0.838583	GTTCGCCGACTTGCGCTCGG;CTGCTGTGCGCTCCCCACGG;TTGGACCGAAATCACCTCGG;GAGGGAACGGAAGTGCAGCA
SARS	4	4598;7717;15759;66504	2	1.31607	0.673387	0.25754	0.841459	0.841032	GGAACACACTGCGTACCTGA;GGAGAGGAGCACATTAGGCT;AAGGCTCACAGCATCCAAGT;ATAACGTTCAAAGACTCCGA
NGF	4	903;27674;53091;57099	1	1.3465	0.673252	0.240781	0.839995	0.838583	AGTTACAAGCAATTCTCCAG;CCCGGTCATTCAATAGCTGA;CTTTACAACCAAGCTTCCAA;GCACAACGACAAAGGCTCCG
XAF1	4	905;44109;63264;72399	1	1.34558	0.672789	0.241277	0.839393	0.838583	AGTCTCCCGCCCGTAACGCC;CGAATAAGGTTGCGTCCGAT;AAGTGGATGGTGCAACACGG;GTCACGAAGCACGTCTGAGA
PTGDR	4	6489;6673;19643;66332	2	1.42942	0.672723	0.200564	0.823625	0.822154	CTGCATGACGAGCTAATGAA;CGTCGTAGGACATAAAGCTG;TACTTCATGAGCTCGTTGAG;TGCCAGAGAATGTTGAATCA
PGM1	4	907;51755;58065;61699	1	1.34465	0.672327	0.241775	0.84066	0.838583	TATTCATAGTTACTGCAACA;AAATGGATCTATGTTCACAA;TTCCAGAAGATTTAACTACG;GTGTACATAAGGATGTGTAG
CASP4	4	909;8162;30155;36331	1	1.34373	0.671865	0.242278	0.841012	0.838583	ATGTTCTGTGCAGTATGAGT;TCCACAGATACAGACCCCAC;ACCATCTGTATAACTGACAG;ACACGGACTGGTTCGCTCTG
ERCC2	4	5106;7408;17777;63457	2	1.34773	0.671808	0.240107	0.839039	0.838583	TATGTCATCAATTTGTGCAA;GTGTGATGTTTGACAAAGCC;GAGTATCGATCAACAAAACC;TATAGGTAATCTTTAGATGG
CEBPB	4	910;31764;41105;69146	1	1.34327	0.671635	0.242509	0.840886	0.838583	TTCACCCTCGATACCTTGAG;CATGTTGGATAAGACCTCCA;TTGTATGGGTTGTGTAGATG;CCAACTCGAGCACAACCCTA
ST3GAL2	4	5267;7314;34714;36424	2	1.35765	0.67159	0.234873	0.837044	0.836676	GATGCCTGCTTGTACACCCA;GATATCGGTTTGGTACCACA;CCATATTCGGAGTTGAGGCA;ACTTGGCTTACAACTCAACA
FAM124A	4	912;16055;38240;56611	1	1.34235	0.671175	0.243024	0.841742	0.838583	CCACAGCGAGAACACCACGT;AGTGGTTCGGGAGCCAACGT;GCGAGATCGAGATCCCGCTG;CAGCCCCTCACGCTCCAATG
ELF2	4	913;22056;49538;68474	1	1.34189	0.670946	0.243253	0.841608	0.838583	ACTGCATTGTGACAACCCAT;TGTTTAGGTCAAGTCTCCAG;CCAGGAAGGAAACATTCAGT;TAGACATAATAGGTCCATGT
MKRN2	4	5710;7086;33182;62374	2	1.38234	0.670802	0.22241	0.831292	0.830415	CGGAGCGTCAGGCTTCCACG;CATCAAGCCCGGGAATACAA;GAGCCCCGTGCACCAGACAG;AGGGGGTGGGATCTGAACGG
RUNDC3B	4	914;42619;50280;77062	1	1.34143	0.670717	0.24352	0.841602	0.838583	GGACATTCGGAGTCTGTGCA;GCTCTTACAGTCATGCAGTG;TCACACAGAAGCGAACTCTG;TAGAAAGTGGTTATTCCTGG
PSMB6	4	5737;7080;26861;34475	2	1.383	0.670504	0.222015	0.83229	0.830415	TACATGCATCCTCTCTGCGA;TTGGAATGACGACAGTATGG;CCCAGCGTACCTGTACCCCC;TCTGTAGTGAATCGGTGGAA
CLIP2	4	915;34663;55178;65064	1	1.34098	0.670488	0.243752	0.841481	0.838583	AGACTATAGAATCTAACTGG;CCTTAATAGAATTATCTCGT;GACACGGCGTAAAGTGATGT;AGTGCAATACAGCCTCATTG
USP13	4	916;52656;69441;70540	1	1.34052	0.670259	0.244018	0.841011	0.838583	GTACTCGGCTCATGAACAGG;TGCACTAACAATATGCGAGT;CAGAGGCCGACGATTCAAGC;TTGCTATCAGCCCATTACTC
NECAP2	4	917;20178;44216;66652	1	1.34006	0.670031	0.244255	0.840907	0.838583	GCTGCGGGAACACACAGACC;TCGCCGGATGAGGAGTTGTG;TGACCTGGGCAGCGACAACG;GGAGTCAGAGAACGTCAACG
COQ2	4	918;8590;8814;21250	1	1.33961	0.669803	0.244483	0.840768	0.838583	ACAGAATTGATACTAACTGG;AAGAGCGGACCTCAGAACCA;ACATTAGTGGGACATACAGG;GTTGGAGTAGAACCTAGACC
LIMD1	4	919;18342;26410;70363	1	1.33915	0.669575	0.244747	0.840759	0.838583	AGGGAGAAACCATCGTGCTG;TGGAGAAGTTGGGATCCGAA;TGGAGCACGTTGATCCACTG;CACAGAAGCATATGACCCCA
DIEXF	4	5451;7264;40389;55991	2	1.36299	0.669507	0.232152	0.833967	0.833967	GCTGCCACAGTCAACGACAG;AGGAAGACCCTATTCACCTG;TCAAGCACGCTGTACCATTG;ATTTACAGAATGGCAAAGAC
ARL15	4	920;25056;44983;46115	1	1.33869	0.669347	0.244987	0.840203	0.838583	TCAAGAGATGGTCCAAATAG;AACCATTCAGAGCATAACTC;GCTGCCAATACTCCAACAGT;TTGCTGAGTCAAAAGGCACT
LINS	4	921;29479;41419;44288	1	1.33824	0.66912	0.245248	0.839267	0.838583	AGTGCGCAGAGAATCTTCCT;AACCCCAGACAATATCCTTG;GTTGGCCGACCTACGCTCCA;TTGTCCTTGAGACATGCATG
GPS1	4	5988;6992;7771;14866	2	1.39278	0.669087	0.217299	0.830468	0.830415	GAAGGAATACAGGATCGGAG;GAAAACCAGACTCTGTCCAT;TGACTCTGCGATGTCAGGGA;GTCACCAGGCTACCCTCTCG
CERS2	4	5742;7123;15928;53135	2	1.37827	0.668832	0.224413	0.832342	0.832061	GTTGTGGCTATCACAGTCCA;TGAGGGACCTGTCTGCACTG;GTGGTACAAAAGGCAGACAG;GAAGGATAGTGCAAAGCAGG
ZNF493	4	923;7916;23194;59019	1	1.33733	0.668666	0.245721	0.839514	0.838583	CCAAGATGGCTGTGATCAGG;GGCGAAATGGATATGGGTAA;TCTTTAGGTCTCTCAAGACC;ACAGCGATGAATTAGCTTCA
PCDHB12	4	924;33882;64826;68819	1	1.33688	0.668439	0.245984	0.839956	0.838583	GATTCATCCCTTACCCGCCG;GGTGGCTGGGTTCCCTACGG;GTATAACCGGGGTTTGACGG;AAGCGTGGACAGAGGAACCT
C12orf65	4	926;13212;16782;35578	1	1.33597	0.667987	0.24647	0.83979	0.838583	GTGACAGGTTGAACAAGCCA;GCAGGCCGCTGGATCCAGCG;GTCCACTTTATAAACCGTGA;GGTCGCTGAGCGTGTCGGCG
IRS4	4	927;22530;24867;33129	1	1.33552	0.667761	0.24671	0.839241	0.838583	GTGGTGTTCGTAGACCGCTC;CCCAGTGAGTGGCAGAGTCG;GGCAGCCTGCAGTAGAACCC;TTCACTCACATACACATGGC
KRT78	4	928;44031;47096;60069	1	1.33507	0.667535	0.246939	0.839566	0.838583	TGTGGCGCCTGATCACCCCG;CATCTTTCATCAGAGCTACG;CTGCCCACCACACAGATCTG;CCAGAGAACGGACATCACGA
ETFDH	4	929;7870;50842;61855	1	1.33462	0.66731	0.2472	0.839998	0.838583	TCTCCATCATGCGAATGGTG;GACTACTGTGAGAGTATCCG;TCAGGTGTCGCATTAGCACA;TTATCTTGATGCACCCAGTG
TMEM8B	4	930;8388;21652;56415	1	1.33417	0.667085	0.247433	0.839882	0.838583	AGCGGTAGTCCCGATCAACA;TGGATCCTTCGGATTCCGCG;ACAGAGTCGGGAATACACTA;AACCACGCAGTGGACAGTAA
AGO4	4	931;10276;29050;65696	1	1.33372	0.66686	0.247663	0.84021	0.838583	CTCACATAGAATCTGGCCCA;GCTGTATGACAGCGACGCTG;AAACAAAACTAACTCAACCG;AGCTTGTGGTGAAAGACCTG
KIAA0355	4	4852;7728;36542;50610	2	1.31497	0.666754	0.258113	0.841581	0.841032	CCCTATTAGGCCGCCCCAAG;GGAGAGCTGCGTGGACACTA;GAGGAGTGCGAAGTGGACCA;CCTCTGCGACTTCGCACCCG
CD99	4	932;7993;50513;54843	1	1.33327	0.666635	0.247924	0.840642	0.838583	CCAGGTGGCTGGACTCGTCG;GCAACCGAAGGATGACGGGC;GGGCTACCGCCAACACTGGG;AGGCCGAGTCGGTCACCCTG
NIPBL	4	6666;6760;37044;44927	2	1.41923	0.666518	0.2051	0.827644	0.826551	TGAGATCACCAGCCAAACTG;GGCAGACAAGGACCGTGACA;CATCGAACGTGACACAGGGT;GACTGGATGATGAAGTGCCG
REG3A	4	933;18880;26122;76584	1	1.33282	0.666411	0.248149	0.840495	0.838583	CCCGGGAGAGCAGAGCCGAG;GTCTTTGTTAATATCCCGCA;AAGAAGGCATGGCAAGACTG;ACGACGCCCAGGAATACAGA
IKZF5	4	5902;7113;15186;22571	2	1.37937	0.666189	0.223779	0.832449	0.832007	GCCCTGGAAGTCGAAGCGGT;GAACGCCGGCTGCATCGCGT;CGAGTTCAAGCTCACGGACC;CTGAGCCCCGCGGTTCAGAA
NDUFS4	4	934;21305;46822;57348	1	1.33237	0.666187	0.248416	0.840041	0.838583	GAAGGTATATGAGCTGTTAG;AAGCGCATGGAGGAATGGTG;TTGAGAAGAAGCTCATAGCG;TCCGAGGGTCCGACAAACTG
FBXO40	4	935;59501;72726;75520	1	1.33193	0.665963	0.248656	0.839951	0.838583	AGCTGAGAAGATCATGTCCA;AGAAAAGGTAGCGCTCCATG;GGAGAAGACGAATGTCGGGG;TCTGGATCACGTCACCGATG
BNIP3	4	5893;7125;28509;53608	2	1.37805	0.665916	0.22447	0.832061	0.832061	TCTCTGGGAGAAACTCCCAG;CCCCAAAGAGGACCTTACGT;AGTCCGAGACTTAAGCTGAG;TGCACAGGATGAGTCCGCCG
LY6E	4	937;9989;41317;63470	1	1.33103	0.665516	0.249155	0.84028	0.838583	TGACACCATGTCCTGACCAA;CCAGCGCGGGAAGGCATGTG;AAGAGAATAGCTTTCTCCAG;TTTCTCAAGATTGAGAAGAA
ROMO1	4	5494;7353;8527;26430	2	1.35352	0.665471	0.237085	0.83874	0.83717	CTGCGAGTGGTGGCTATCCA;TGAGGGATACTTGTACACCT;TGGAGCCGAAGAGTTTGACC;ACCAAGCTATACAGCCGACA
NTS	4	938;37793;44478;55319	1	1.33059	0.665293	0.249387	0.839261	0.838583	CCCACCTAAAGGGGATCCTG;GCGCTCGTTCAGGAAACCTG;GCCGTGTAGATCCCAGTCCA;TACCTAGGAATGAATGAGCG
ZNF597	4	939;13785;14915;38762	1	1.33014	0.66507	0.249619	0.838692	0.838667	GCGAGTACCAACTCTACAGC;AGTACATCTGTATGAACAAG;TACTGGTTAAAATTAGGAGA;GGTAGCACACTTACAGAGTG
GK2	4	940;63892;65404;66462	1	1.32969	0.664847	0.249883	0.839133	0.838667	GCAGGAAGTGTAAACACCTG;ATGTGAGCCGTAAGCAGCTG;CGCCGCGGGCACTGATCCTG;TCCACGTGGAGAACCAGACG
SLC13A2	4	946;39542;55812;63326	1	1.32703	0.663517	0.251362	0.840953	0.840086	TCTCCCGGACCCCGTCAACT;GCCACTTCAAGGACCCCAAG;GGGTGCCAGATTAGCGGACG;TTCACGGATGGGTGTCTCCG
CAAP1	4	6474;6921;17733;29859	2	1.40077	0.663417	0.213543	0.828716	0.828465	CCCGCAGCGACTCTACACCG;GGAACCCCGAGCGCGTCGCG;GAGATCCGCTCTGTACACGT;TACGTGGCCATGAACCGCCG
NR0B1	4	947;20975;21173;61454	1	1.32659	0.663296	0.251599	0.840848	0.840086	TCTCCGGGTCGAAATAGTGC;CACCTGCAGATCCACAAGAA;ATCCTCTGATCTGATCATCA;GGAAGTGATACTGAGGAGAG
Non-Targeting Control-GGAGATGCGGCCTTCTCAAA	1	3652	1	1.32644	0.66322	0.251665	0.840623	0.840086	GGCGGCGTCTACGAGCACCT;CAGGCGTACTAGACACCGTC;TACCTGGCCATGAACAAGAG;ACGTATTATAGCCCAGCTCG
COPS4	4	5173;7616;21778;65056	2	1.32626	0.663167	0.251727	0.840382	0.840086	TCTATTGGAAACAAGTTGCC;AGACCAAGCCAACTGCAGAT;TCAGAACAAAAGGACACTCT;GGAGCTGACTAGCTTAAGAC
TMEM222	4	948;25848;49518;62877	1	1.32615	0.663075	0.251871	0.840416	0.840086	GCTGCTGGGACGCATAGTGC;CCCCCTGTACTCACACCAGT;CTTGATTCCAGTAAGGTTTG;CACGGATGGCCTAAGCACCG
HIST1H1B	4	949;8930;12304;19519	1	1.32571	0.662855	0.252106	0.840755	0.840086	GGGGCTGAGGAAGCGACCCG;GAAAGGGGCGGCTAGCAACG;CACCGTCGCGGGATTCGCGG;GCCCGCGGTAGGCGCACTGG
SYNGR2	4	5624;7357;17259;64483	2	1.35309	0.66273	0.237202	0.838682	0.83717	TTTAACTTCATTATTATACC;TTCAACAAGAGCTTTAGCGT;CTTGCTCATTATAAGTTCCA;AAGTCGCGAGACATCGGCCA
SLC7A7	4	950;10192;39116;76020	1	1.32527	0.662635	0.25234	0.840643	0.840086	TGGTGGCCACTGGTACAAGG;TTGCACATAGGGGAAACCGT;GGTAACTGTGCCTATTCGAG;GAGGTAGATCTAGACTCACG
PIK3R2	4	953;27168;29332;40147	1	1.32395	0.661976	0.253072	0.842189	0.840086	CGACTAACCCAGCACGACGA;CGCGACCACACGTCACCCGT;AGTCCACCGTCGTGTTCACG;GATGGCCGCACCATCCACAG
CATSPER3	4	954;11934;44821;74963	1	1.32351	0.661756	0.253341	0.841747	0.840086	TGGTGGAAAAACATTTCCAT;TCTTGTGAATAGGAAACCTG;TCACAGTCTGTCCGGCTTCG;ATGTCCTTGTGTGCCCGCTG
GLIPR2	4	955;16843;24101;54778	1	1.32307	0.661537	0.253572	0.841624	0.840086	CCCCCACAGACGCTGACACA;GCAAACTTGTTCTCATAGCA;TGGAATATGGAGGCCAGACA;TGACATACCGTGATCAGCCG
HOXB13	4	956;31780;66259;67107	1	1.32264	0.661319	0.253805	0.841508	0.840086	CCGCTTTCCAGTGACCGACG;GGTGCTGCAGAGCGACACCA;TTGCTGAATATTGTCCACCA;GATGAGTAGTGCCTGCCGGG
DUSP9	4	958;48843;75353;76057	1	1.32176	0.660882	0.25431	0.840963	0.840086	CTAGCAGTGTTAGTCACCAT;ATCAGTGGTAATCCATAAGG;ATTACGCATTCAGTATGCAT;GAAGACCCTGATGCACGCTG
VCP	4	6670;6908;10781;10794	2	1.40224	0.660792	0.212826	0.829521	0.828463	CGGCTGCCCCTACTACCAGT;AGACGGTGTAGCCTCGCCAC;TGGCTGGCGAAGATAGTCCG;AAAATTTGTGAATTCAGCCT
CD58	4	960;10610;14065;39657	1	1.32089	0.660446	0.254816	0.841308	0.840086	GAGGTAGCTCTCGGGCAACG;CGGGGTGCACTCACACGTTG;CATCTCTTCTACAATCATGA;GCCCGTGTAGTGTTCGATGT
RAB43	4	961;17358;46405;74639	1	1.32046	0.660228	0.25505	0.840756	0.840086	CCCCTGGCGTGGGACGCCCG;GCGGGCAGCTCGGTCCGCGG;GTTGATGCCGTAGCGCACGC;GAAGACGCCCCCGTGCACCG
RPL29	4	6048;7208;24486;61151	2	1.36902	0.660089	0.228985	0.83452	0.833967	ACCGGTGTAGTGCACCACGC;GGGCGCACCTTCCCCAAGCG;GGCAAGCAGGAGGTGATCCG;GAAACCATCTCCCCAGGAGA
LAMB1	4	962;12845;38330;52286	1	1.32002	0.660011	0.255286	0.840212	0.840189	TGACAGGAATGCTCCAAAAT;GAGACCATCTCCCCCGGAGA;CAAGAAGGGCCAAACGTGTG;ATCCCTGCTAGATGAGCTTG
RHBDF1	4	6587;6965;21873;57443	2	1.39581	0.65995	0.215848	0.829462	0.829462	CTCAATCTCAAACAGGACAG;AGGCCCTATTGCTTCTGCGC;TCTATCCTAGTGAAATACTC;CTTACAGATATTACACTGTG
TBC1D3H	4	5430;7550;9003;12326	2	1.333	0.659941	0.248013	0.840488	0.838583	CCCTTCATTTGCATACGGAA;CTACTAAATGCCCATTATGA;AAAATCAATGTAGCATCCGG;CAAGAACAAACCATTTGGGG
ZNF182	4	963;60986;68577;69317	1	1.31959	0.659794	0.255519	0.840538	0.840189	GTCAAGAAGATCGTAATCCG;TCCAGCTCAAGCGTTTCGGT;CAAATTCTAGAGCATACTCA;CAGAGCTAACTATGGGCGTA
THRAP3	4	6807;6886;33092;44064	2	1.40474	0.659523	0.21174	0.828369	0.828369	GAGTCTATCCCGTCTAGCCG;GCTGGTTTGTCAAAATCCAA;CACTCAATAAACCTAGAGTG;GGCCACTCATGCGATCCACT
TNPO3	4	5582;7474;21967;36572	2	1.34084	0.659477	0.243816	0.841238	0.838583	GTCCTGCAATGACCTGACAC;AGAACTCGGAGTAGTCAAGG;AGTTGCGCAAGTTGACAGCG;GAGGGCTAGACATCTACGTA
RCL1	4	5516;7524;26314;61938	2	1.33567	0.659076	0.246564	0.839656	0.838583	AGACGTTAGAGGGCCACCAG;TGGCCATCTCGATCTCACTC;AAAGGTTTACACTCGCCATG;AGGACTATTTGCACTCTTTG
PROKR2	4	968;35777;44300;67460	1	1.31742	0.658712	0.256769	0.842004	0.841032	AACCCCAGGGAATTGTGCTA;ACAGCTCTGTCAAATTAACT;AACACAGTGTATCCTGCCCA;CATTCCAACAGGAATACCAG
C1orf112	4	970;10141;21225;59719	1	1.31656	0.658281	0.257268	0.841883	0.841032	GAGCACCACGAAGCGCCGCG;CTGGGTGCCTGGATCAAGTG;CAGCCTTCAAAGAAAAACCT;GCTGCAGAACGGGCCCAAAG
ANKRD23	4	971;18518;22827;52798	1	1.31613	0.658066	0.257507	0.841787	0.841032	TCGGTAGAAATAGAATGGGG;GCAAGGACCTGACGCCCCCG;CTAGGCGAGTTCCATCCATG;CCTGTCGGATACCGAGTGTG
FGF17	4	972;21194;22482;52159	1	1.3157	0.657851	0.257746	0.841692	0.841032	CCTTACTCTTGAGAGCGCTG;GGTAGTTCATGATGGCGCGT;CATGGAGAGCACAGACAACG;GGTTAATCCGTATTCTGCGG
HOXA2	4	973;38030;41129;47697	1	1.31527	0.657636	0.257981	0.841584	0.841032	GACATTACTAGAAGCAAACA;AGAGCAACCCAGTTAAACAC;GAGTACTGTGGAGAGCTCGG;AATTCAAAGACAGTCTACCC
GRXCR2	4	974;30271;60722;66135	1	1.31484	0.657421	0.258253	0.841599	0.841032	GCGGAGCATAGAACGAAACC;CTCCACAGAGTAGACGACTT;TAGAACAACAGATGAATCGG;AAGTCAACCCTCGCGTGCAT
Non-Targeting Control-AGAGCATGATGACCCGTGAC	1	3752	1	1.31471	0.657354	0.258284	0.841263	0.841032	CTGTCGGTAAATTGTTCTTG;CTCCCAGCAAGCATTCTGTG;ACTGTGTAATCTTTGCAACA;ACATTCACAGGACCATGCAG
CSE1L	4	6134;7242;15429;20326	2	1.36535	0.657346	0.230921	0.835759	0.833967	AGGTAGTGGAACCACCAATG;CAGATCACCAGTGATAAGGT;GAGTTATAACCACCTTCGGA;CTACGAGCCTTACCCCTATG
G0S2	4	975;13101;38402;61709	1	1.31441	0.657207	0.258492	0.841068	0.841049	TCGGGCCTCAGACTGTACAG;AGTAGAAGAAAAGATCCAAG;CACAGAAGGTATAGCCACCA;AGGATCCAATAGCAGAGCCA
CKB	4	977;32551;74585;77366	1	1.31356	0.656779	0.258997	0.841839	0.841124	GAGGCGCCCCCCTACCGAAG;GGAGAGAAAGCACTGAAAGG;TTATAGGCGTGGAATTGCAG;AAGATTCCAACCATCTGGAT
DPY19L2	4	978;36658;48213;51003	1	1.31313	0.656565	0.259169	0.841529	0.841124	TATTCCTTAGAAGTTCCACC;TGGTACAGCCTCATTTCCTG;CCAAGCATCAACACCATGAG;AGTACAGCCCCCCACAACCC
PTPRM	4	979;28768;47744;74650	1	1.3127	0.656352	0.259281	0.841459	0.841124	CCACTGGTAGATTTCACTCA;CGAGTGGAGCTACTACCCGG;AGTCGTTGAAAGACAGCGAG;AGATGCCGAAGGGGTATCGG
SYT13	4	980;24594;39919;56879	1	1.31228	0.656139	0.259392	0.841383	0.841124	GCGGCGGCGCTCGTACGCCG;GCTGCTCCCACCCAACGCCG;GCCTACGGCTACGGCCCCTA;GCCGTTGTCGAACATGTCGG
PRMT1	4	5557;7586;40312;43573	2	1.32931	0.656133	0.250012	0.838667	0.838667	AGACGAGGTGGAAGACGAGG;GAGAGCAGTAGGTAGCGAAG;ACTTGGTGCCAAACTCTGAG;ATTGTCGAACATGTCTTGGG
DPY19L4	4	982;13566;14429;45717	1	1.31143	0.655713	0.259615	0.841671	0.841124	TGAAGACGAGGTGGAAGACG;GCCATTGTCGAACATGTCCT;GGAACTTGCGGCGGTAGTAT;ACTTGGTGCCAAACTCTGAA
CD109	4	983;38574;54207;66592	1	1.311	0.655501	0.259722	0.841586	0.841124	GTAGGTAGCGAAGAGGATGC;AATCGATGTCCTGGGAGAGG;TCCCAAGACATGTTCGACAA;GAACTTGGTGCCAAACTCTG
NOTCH2	4	984;43109;52417;63348	1	1.31058	0.655288	0.25983	0.8415	0.841124	CTCACCTTCATGGACCGCGC;AGCGCGTTGTAGCTGAACGG;AGCGACGACGTGTTCATCGG;TACTACCGCGAGAACAAGCA
METTL8	4	985;12048;53962;62268	1	1.31015	0.655076	0.259941	0.841426	0.841124	TCTCAACAAGTGTTTCCGGA;CCAGCGGTAAATCTCGCTGA;TCCAGACTCACCGTGCTGAG;TGTAGCTGGCTATAGATGTG
CLSTN2	4	986;8975;36710;75698	1	1.30973	0.654865	0.260052	0.841352	0.841124	AGGCTGGCATAACTGTATGG;GGTAAACCATGCGGTCGATG;CCTCGATCTAAGGATGACCC;CTGTTGTTAAGGCTACTGCG
FBXL19	4	6500;7146;13084;27193	2	1.37576	0.654659	0.225636	0.832943	0.832843	GCATTACCCCTACTACCGGA;CTAACTTGGACCCAAACTCA;AACAGGCATTCCGGAAACGG;AGGTCACGTTCTGCACAAAG
P2RY4	4	987;20504;31214;75232	1	1.30931	0.654653	0.260163	0.841278	0.841124	TCATCAGATACTCGAACTCG;GGGGCGTGAAGATCTCGAGG;AGCTGCGCGTAGGAGTAAGG;TCTGGAATGTTGATGGTCAG
TNNI2	4	988;9707;13967;22741	1	1.30888	0.654442	0.260272	0.841197	0.841124	TTCTACCACGACAACCGGCA;GCGTCCCCGAACGAGGACGC;GGACCGTACAGATACAGCAT;GCTGTAGGGAGGCTTCTGCG
TRIM45	4	989;61718;64919;75882	1	1.30846	0.65423	0.260383	0.841124	0.841124	TCTTTCACCTGAAAGCCGCG;GATGCCTGATGCGTGCACCC;GCTCTACTAGGGAAGCGTCG;CCATGTGAAGGCACATCTTG
U2AF1	4	6724;7062;14729;31635	2	1.38499	0.654205	0.221022	0.831547	0.830415	CCTGGTCCAATGTCAAGTAG;ACCAGGTATGAGCTGACCCG;ATAGCCTATCCAACATCCAG;CTTTGAAAGACATCTATACG
WBSCR16	4	6797;7038;12946;24510	2	1.38765	0.653977	0.219756	0.832266	0.830415	TCTCCCTCTATGTCATACAA;AGAAGACTAAAGGAGTATGG;TGACTCACTGTCCACTAGAG;CATAAACACTGACCTTGCCA
ALDH3A1	4	991;40647;51862;63449	1	1.30762	0.653809	0.2606	0.841392	0.841222	CACCGGAGTATGGCCAACCC;GCTGACTCACGCCACCACAG;GCAGATGGCAAGTGGCCGCG;CCCATCTACTCGTACAGGTG
FAM178B	4	992;19220;42250;68695	1	1.3072	0.653598	0.26071	0.841315	0.841222	ACTCTCCGTGTCCGTACAGG;TTTGCTGTCATTGTTCCCTG;ACCACGGGTGCAGACAGCAA;TGCAGCCCAACCAAGCCTCG
C19orf70	4	6862;7022;10271;28040	2	1.38943	0.653593	0.218958	0.831247	0.830415	ATTAGGTGGAAGTAATTGAG;AGCTGGAGGTCTCAGGACGT;AAAGGCAAACCGCTTCCGAG;AAACCCAACCCTGATAAGGA
BHLHE22	4	993;19052;31090;57708	1	1.30678	0.653388	0.260818	0.841233	0.841222	GTTTCCCTGGATAAACACAG;TGCTATTCGAGTGCTAGTGG;TCCGGCTGCGTTGATCACAA;CAGGGGAGGAGCATCGACTA
OSBPL10	4	995;27290;30004;72166	1	1.30594	0.652968	0.261039	0.841513	0.841222	TCGGAGGATACATTCCGTGA;ATACGGTGGAGAAGATCGCA;TAACTCACCGAGCCGCATGT;GGGTGACCCTCAGACACAGT
GRWD1	4	5653;7634;32109;69333	2	1.32443	0.652607	0.252736	0.841516	0.840086	CTGACAGCAACGATGGACAT;CTACAGTACCTGGTAAAACG;TGGTAAAGACGAATTTGCAC;GGACCAACGACCCTAAAGAG
FOXJ3	4	997;48096;72564;76250	1	1.3051	0.652549	0.261255	0.841778	0.841222	AGTCACCCTTCTTAACTACG;AAACAAGTGCAGTTCAACCC;TCTGTCCAGACACTCTCATG;AAACAGGGACTGGATACCCA
MFN1	4	998;11219;54876;73028	1	1.30468	0.65234	0.261368	0.841708	0.841222	CAAGATGGGAAGTAAGCCTC;GGAAGCTCATATACTACACG;TGACTCTTGGATTGACCATG;CCAGCTGGAAAAACGGTCGC
ERCC6	4	999;11300;27038;52071	1	1.30426	0.652131	0.261474	0.84162	0.841222	TAGCTCTGCACTCCGACTCG;TCAGCCAACACTGAGAGCCG;TGAGGCAAACACAACCGTGA;ACTCCTCACTGTTCTAACCC
CDKN3	4	1000;22580;31229;32205	1	1.30384	0.651922	0.261586	0.84155	0.841222	GTGGCCAGCACAATCAGACC;GCCATGGGGTAGGTAGCTCG;GATCTTCTGACTAGGTCGAG;GACTGTATGTACCTTAACAG
SLC25A32	4	1001;49018;52648;64517	1	1.30343	0.651714	0.261694	0.841465	0.841222	CCTCAGCTACCGGATGATAG;CTCCTACGGCACCTTCGCGG;AAAATCAAAGTGGACGACTG;GCCTGCGTCCATGATGACAA
MARCO	4	1002;30663;49904;74739	1	1.30301	0.651506	0.261805	0.84139	0.841222	TCTCCAAATGAGGGATATCG;AAATAATAGTATAAATGTGG;TACACCAGTTTGTTAACAGA;GCATGTTCCATTGGAGGCGA
DOCK9	4	1003;30631;46631;69685	1	1.30259	0.651297	0.261912	0.841305	0.841222	GTTGTCCGAGGAACTAGCAA;AGTTTGATTGGTGACCGACG;GAAGTGATGCGATAATACGG;ACTGACGGCTAGTCTCCTAG
AASS	4	1004;23398;61010;66151	1	1.30218	0.65109	0.26202	0.841222	0.841222	GCGCTACTTCGGCGGCACCG;AGGAACGTGTCCACGCGCCA;TGGACGCTGACGGCCACCGG;GGAGTTCCGCTCCGGCAAGG
HINFP	4	5973;7505;19001;36473	2	1.33763	0.650975	0.245548	0.839379	0.838583	CCGGCTATCATTGAAAGCGA;TACCGGCGGACCAACTTCGA;GCTCGCGAGAAAGATGGCAA;GGGATGTGGACGCATCCAGG
NPAT	4	6190;7407;21104;41675	2	1.34783	0.65053	0.240076	0.839398	0.838583	CATCGCTCATCCTTTACACG;TAGTCAATGTAATAATGCCC;AGATCCAGTAGAGTGTTTGG;CAGAGTGCGAGCTTGTAACA
FGF10	4	1007;25173;26251;55164	1	1.30093	0.650467	0.26234	0.841821	0.841597	GAGGTGCTCTCAACAGAACC;ACAGAAAAGATTGAGCTCAG;AGAAATGAGAATAAAGCTGT;ATCAACAGGTCCTTCTCATG
JAKMIP1	4	1008;43082;47709;65144	1	1.30052	0.65026	0.262452	0.841749	0.841597	GGAGAGCGGGCTGAATGCAA;CACCATGGACAGGTAAACGT;TCTTCAAAGCCACATCATCG;TGTTCACCTTGATATCCTGA
IFITM1	4	7020;7050;20708;62595	2	1.38632	0.650233	0.220442	0.831855	0.830415	TCTCAGGGACCCATTTGTGA;TCGGGTCAGTCACGTCAGCA;CCCCACAGTCTAACACCCGA;TCCTGCCAGGAAGCACCTCG
CCNT2	4	1009;54577;64890;74045	1	1.30011	0.650053	0.262565	0.841683	0.841597	AGTGTTACGAACCATCCCCC;GTCCATGATGCTTACTCACA;AGGGTCTAAGGGACCAAAAG;TTATTAGAGGAAGTAACACA
LOC101929372	4	1010;18362;34589;52585	1	1.29969	0.649847	0.262672	0.841597	0.841597	GCTCGGGGGACAGCAGTGCG;CCTCACCGGACTCTCCACAT;CCCATGGAGATCCGTGCAGA;CTCGTACTCCGTCCACACTG
BAGE2	4	6308;7374;58162;65130	2	1.3513	0.649673	0.238163	0.837836	0.83717	GATTACCAAACCGGCCATTG;TGGACGCCGACAAAGGTGCG;ATCGACAGGCCTAGGCCATG;CAGGGTGATGCGGAATACCG
MAN2A1	4	1012;37295;70005;75040	1	1.29887	0.649434	0.262894	0.841876	0.841876	ATCGGGAGCTGCCTACCGCG;TGTGACTGCAGATAGAGCAG;GCGACAGCGGGTAATCCGAG;CGGCACAGACTTCCGCGCGT
ACAD10	4	1014;34337;40652;67668	1	1.29805	0.649023	0.263107	0.842132	0.842132	GGAATACCGCCACATCCCGG;AGGGGTCCATGTTCGCCGAG;TAGCGAAGATTCAAGCCATG;CTGCTGTAGGTATCGCCGGT
TRAF2	4	5714;7723;20892;32842	2	1.31547	0.648435	0.257838	0.841557	0.841032	CTGGAAGCCGGACTCAGCCA;GGTGTACCCACAGGCAGACA;CAGCAGCTGAAATAGCAGTG;TGTCCGTAGCAGGATCAGGA
C7orf43	4	1018;20244;35729;40290	1	1.2964	0.648202	0.263545	0.843104	0.842594	GGTGTCTTAACTGTCAAACT;CGTGCAGGTCGCATCGATGT;CTGGAACTTTGGGCCACCCA;TTTCAGAGTTCGAACCAACG
Non-Targeting Control-ATACCAGATGCGTCCGCTTG	1	3916	1	1.29613	0.648064	0.263545	0.842675	0.842594	GTTCTTCCTTTAGACTCCCG;CATAGGTTCGAGTCGCATGG;AACTGGCCGAAGTCGCTCCA;AGAAGCTACCAAGCACCTAG
RPS3	4	1019;10940;43236;48452	1	1.29599	0.647997	0.263654	0.842594	0.842594	CCACACAGAAAACCAAGATG;TCTCTTTCCAGAAAGTCCAA;CCCCGCTCACCGTAAGTGAA;GACTACCAGTCCCTGCAGAT
WDR87	4	6994;7138;42071;56496	2	1.37663	0.647381	0.225185	0.832259	0.832259	TGGGGGACTGGTGTTCGCTG;TTACCAGACCCTGAGGATTG;GAACAAACTTACTTAGGATA;TACCACTGGCCAGGACCATG
PRKACG	4	1024;25975;43250;58893	1	1.29395	0.646977	0.264197	0.843898	0.842853	AAGAACTTATTCAACAACCA;CCAGTGGGCTTTAGAAACGG;GAGTTCTCGGTACTTAGGGG;GCTTACTTTAGGTCAAACGG
C1QB	4	1025;20362;23601;28984	1	1.29355	0.646774	0.264306	0.843819	0.842853	TGGATACTACATTACCACCC;GTCCCCCGAATCATTCCTTG;TTGTCCTTTGGAAACCCAAG;ACGGGGACCTTGCGTACGAG
CDRT1	4	1026;15806;68481;74923	1	1.29314	0.64657	0.264415	0.843739	0.842853	CGTCGGCCAGAACCACTCCG;GGTGTCGGTGGCCTACATCG;CTGCATGTCTACCAAGTACG;CGCTCACAGATAGAGCGGCA
ZNF461	4	1027;18153;63446;66717	1	1.29273	0.646367	0.264527	0.843666	0.842853	TGGAAGCCTTATATTGTGCA;AATCCAGATTCACCATAGGG;AAGTAAACAATGTGGCCGAG;CATCCAATTACAACCAAGAG
HSPA9	4	6978;7173;28261;46249	2	1.37282	0.646342	0.227131	0.834053	0.832843	CCTAGAAGAATCGATCAGGA;GAGCAGCCGTACTGGATGAG;CAAGAAGGACTTAAGAACAC;ATCTCCATGTGCCAGAACCT
SMU1	4	5950;7655;30194;38336	2	1.32231	0.646286	0.25393	0.841035	0.840086	CCAGTTCAACCACGACACGC;GGAAGCGTTCCATGTCGATG;CATGGATTACAACCGCAGCG;CGGCATGAAGTGGGGCAACG
TPP2	4	1029;13122;35919;39670	1	1.29192	0.645962	0.264742	0.843923	0.842853	TGTCTCCCGTCAGCAACAAG;CCGCTCAGACCAGCCCACGG;GAGGGCCACACGGCACGCGT;GGCACTCCACAGGTACACGC
DIMT1	4	1030;10355;26198;31665	1	1.29152	0.645759	0.26485	0.84384	0.842853	ATGGTGAAGCTGTACGTGCT;GCCGAGCACCACGCCGAAGA;GATGATGGCCCAGAAGCGCA;TCACGGCCGCCAGACGTCTG
TIMM23B	4	1031;34226;44613;53917	1	1.29111	0.645557	0.264961	0.843766	0.842853	GTTCTTACCACTTAAAGACG;ACAGGGAACTGCTTTATCAG;AGCAGGTGTATACTACGTGA;ACTCCAGCAACAACTTGATG
CRCP	4	5966;7671;16983;33648	2	1.32069	0.645456	0.254875	0.84062	0.840086	TAAAGAGGGTCCAATAGATG;TAGGCATCACCCTTACCCAG;CTCCCCGAGTGCCTATGGAG;GGGAGGCGTAGTAGGCCGCG
SPAG6	4	1032;31980;59499;66357	1	1.29071	0.645355	0.265072	0.843691	0.842853	CAAAATCTTGCCCAGCACAG;ATGCTGGGTGTACTTGCCGG;GGCACACAGTGAGACACCGG;AACAAGAAGGAGATTCAGAA
HAPLN3	4	1033;13547;39902;76028	1	1.29031	0.645154	0.265179	0.843606	0.842853	GAAGATCCGAAAGAAATACC;GGATCTTCTCGCCCTCAGAG;CCTGGACAAAAAGAAATACC;CTGGTGCCTTCTGATCTCAC
ZBTB7C	4	1034;31508;60219;70227	1	1.2899	0.644952	0.26529	0.84353	0.842853	CCGGAAGAAATATCCGGACA;AGAGAAGGCTCCAAAAGCCA;AGGACCATCCCTTTGAGTAT;CAGTAAGGTCAGAGGGCACT
STKLD1	4	1037;49721;56254;67230	1	1.2887	0.644348	0.265615	0.844138	0.842853	TCCCACAGAACACAGATGCG;GGTTCCATCTGATATCACTG;TCGAGCGAAATATCCCGACA;AGATTGTTGACATTGACAAA
VNN2	4	1038;10058;47883;54197	1	1.2883	0.644148	0.265731	0.844079	0.842853	AGATTGAGTATGTGTGCCGG;CTGAGGTCTTCACTTCGGTG;ACGGCGCGCAGTGTACATCG;CATTACCGACCAAATCTACC
CHRNB4	4	1039;30858;36619;39547	1	1.28789	0.643947	0.265841	0.844002	0.842853	TCTTTCTAGATCCCATACAG;CCGAAATGTTGAGTGTGGTG;CTCCAGAGAATTTCTCCCCG;AAGCAGAGTGCACAGAAGAA
RNF34	4	1040;12343;32626;49880	1	1.28749	0.643747	0.265953	0.84393	0.842853	AGCTCGCAGCAGTACCTCTG;AGCTCCCTTTACTACAGACT;TGGAGCAGATGCTTCAGCTA;AAACCTCTACTATGCTGGCA
PHAX	4	6983;7243;14908;16392	2	1.36525	0.643746	0.230952	0.83539	0.833967	GTAACTCTACGACATCTCGA;CGATGGACATGCGCACATCG;GAAGTTTGGATATTACCCAG;GACCATATTGAGCTGCAAGG
SYCE1	4	1041;41478;44758;67834	1	1.28709	0.643547	0.266062	0.843851	0.842853	GAAGATATCAGTCTTCACTT;CCATTAGGTTATTTAACCGG;CAAACTCCTGCGGATCACAG;GCTACAACCACTGAGCGTGC
DBP	4	6300;7560;15958;20359	2	1.33197	0.643365	0.248542	0.840015	0.838583	TCTCGGAAAGAACAAATCCG;TCTGGCACTGATACTCAAGG;CCCTGTGTCAGACACTGACA;CCACAATGGCAAGAAATCAG
KLHL13	4	1042;23817;60693;76237	1	1.28669	0.643347	0.266173	0.843776	0.842853	TCTTTCAGAGCGCATCACTC;TCACGGTCATTATGCAGGGA;ACAACATCACGATATTTACC;TGAACCAGTACCACCTGATG
EPB42	4	7052;7227;47350;48926	2	1.36697	0.643322	0.230013	0.836326	0.833967	CTCACAACTTTCGATCTCCA;TAGGGTAGCTGACCAACTCT;GAACAGTTCTCTATGGACTC;AAGGATATGACATTCGCTTG
BAHCC1	4	1043;15224;38156;74027	1	1.28629	0.643147	0.266283	0.843701	0.842853	ACATCAGTTTCAATTACTGT;GGATCAGCCACTTCTACGGA;AGAACAACTGTCAGAATGCA;TTTAACGGTGAACAAAACCT
ALG10	4	1044;12749;45879;46623	1	1.28589	0.642947	0.266396	0.843633	0.842853	AGACGTTGTCACGATTTCTG;GTTGAGAATAAGAGTCACGT;CCGCAATTCTAAAACCGCAG;AAAACCACAGTCAGTATACA
TTC36	4	1045;15932;26411;64045	1	1.2855	0.642748	0.266505	0.843553	0.842853	GAGCACGTTTGTGTGTCCAA;GCATGACCATCAGGGTAGCG;GAGTTTGGATAGCATCTCAG;ATGACCATGATTTCAGCATG
CD302	4	1046;12951;22194;72648	1	1.2851	0.642549	0.266613	0.843469	0.842853	CTAGCGTACGATACCTGGTG;CTATTCCATAAAGAAAGCTG;TTACATCGACATGCAACCAA;GACATTTGATCGCTCCACCA
GRM1	4	1047;13907;58264;61546	1	1.2847	0.64235	0.266722	0.84339	0.842853	GCGACGGCCATAACGAACCG;GGCACGCAGCCTACTAGGTG;GCAGCTGGGACCGCGCTACG;TGGAGGCCGAAGAACGCGAA
FAM171A1	4	1048;31081;50034;61831	1	1.2843	0.642151	0.266833	0.843315	0.842853	GTAGAGCCTCCTGAAATGAT;GCTCAGGAGGGACAGGATGA;TGCAGCTGCTCAGGAGGGAC;TGCTCAGGAGGGACAGGATG
TNFSF14	4	1049;28505;53896;65372	1	1.2839	0.641952	0.266944	0.843242	0.842853	ACTTGTTGCTTAGTAACCAA;CCCAGCATCATACTGAGCCG;TGTACTGCGTGTCGTGCGGG;AAAACAACATCGAAGATGTG
FERD3L	4	6688;7423;27046;74818	2	1.34615	0.641816	0.240903	0.839485	0.838583	GGAAGGAGGACTCGAACAAG;CATGCGCTTCCACTACGACG;GATCGCTACTACGACCCCAA;AAGAACACGATGTTGCGCCG
CENPBD1	4	1050;20747;29860;49152	1	1.28351	0.641754	0.267055	0.843168	0.842853	CATGTTCGCACACAACACGC;TAGCGACTCGTCGAAGTACT;CCACCTGCGCTTCGACCGTG;CGAGCGCCACAACCTGACGG
ARGLU1	4	1051;12973;17910;51463	1	1.28311	0.641556	0.267164	0.84309	0.842853	GCTACAGCTCCGACAGCCCT;ATAGTAAGTTGCGAGCGTAG;GTAAAAGGCTACCGCCCACA;ACCCCAAATCGAAAGAGGCA
PCDH18	4	1052;27449;43925;67766	1	1.28272	0.641358	0.267274	0.843012	0.842853	GCCATGGAGTGGGCACTACG;CTGCCTATTATGTCGTGACC;ACGTGCTCGACGACTCCGAC;ATTATTTCCGAGGATACGAG
TRPV5	4	1053;16792;33361;65350	1	1.28232	0.64116	0.267384	0.842936	0.842853	TCTCCACGGCCAGATCATGA;TGGAAGTTATCGATGACCAC;GGTTGGTACAACCACCCGTG;TGGCGGTCATCCACTTTGCG
WDR46	4	7148;7254;27494;45803	2	1.36406	0.640989	0.231504	0.835464	0.833967	ACCAGTTCATGTAATTCGAA;TAATCTTCCTACAACAAGTG;GCTGGAATGGATATTTGGGG;TTATGACATCAGGAGAACAG
Non-Targeting Control-AAACGGTACGACAGCGTGTG	1	4049	1	1.28162	0.640812	0.267491	0.842853	0.842853	TCTCGTACCGAAAGTCGTCA;GCGAGCGATTGAGCACACTG;CTTACTCAAATGGGTCGCTG;TTCGAAGAATCCTCACACTG
OVCH1	4	1058;14218;61781;73314	1	1.28035	0.640174	0.267928	0.843805	0.843735	TTGCGCAATAATGAACGGCA;CTCCGAGGCAGACTCGATGT;TTCCCGGATCAGATGCGTAG;AATGCCAAAAAGTGGCGCGT
ARL14EPL	4	1059;48180;53685;67861	1	1.27995	0.639977	0.26804	0.843735	0.843735	GAGTAGACAGTCTTCCGCTG;ACTCGGTGTTCACTTCGCAG;GAGGCCGTACCTGTAATGGC;GTGACAGGAACTCCCTCGAA
VWDE	4	7222;7255;14982;18754	2	1.36396	0.63992	0.231646	0.835015	0.833967	ATCAAAGAGTGCCACCACAG;GCCCCAGTGTGCAAACAGAG;GCTGACCGAATATGTGGACA;GAAGGCATGGAAGTCTACGG
OR4D5	4	1061;43283;64083;75559	1	1.27917	0.639585	0.268257	0.843997	0.843911	TCTGTACAAGGATAAGCACC;GTATAATTAACCGAACCCCA;ATATGACCAACTCTAGAACA;CCTCATACCCGAAGTGATTG
SLC30A3	4	1062;28588;32308;45179	1	1.27878	0.639389	0.268365	0.843911	0.843911	TCTCTGCCAGGCTCAGCAAG;TTAGGGAGGCGTTACCCGGT;GGGTGACCAAGACGGAAAGA;CCGTCTTGGTCACCCATTTG
FAM25G	4	1064;18425;38179;57055	1	1.27799	0.638997	0.268584	0.844179	0.844098	CCAGGCCACCATCTACACGC;TACTACGGCACCGTGCGCTA;GTACGCCAGCAGCTTTACGC;GTAACGCCCGCGCCGCAGTG
MBNL1	4	1065;13380;15524;19848	1	1.2776	0.638802	0.268693	0.844098	0.844098	TGCTGGCGCTGAGTACGTCG;CTGTAGGCTCATTTGCAGGG;ACTGTGGCGTGATGGCCGCG;TCACACCCATGACGAACATG
PELI1	4	1067;24055;27253;53914	1	1.27682	0.638411	0.268917	0.844382	0.844137	GCAGAGCAGTCCATCTAAGG;GTCTTCGGGAAGTACCTGAG;TGGCCTTCACAACCAAAGCA;AGCTAGGTCATACTCTCCAG
DRD4	4	1068;20516;22366;46132	1	1.27643	0.638217	0.269024	0.844293	0.844137	CAGCTCAACCACACGCGCCG;CGCCTACAACCAGTACGCCG;CTCAACGACTGCGTGTGCGA;AGCCGCTACCTGACCTACTG
SWT1	4	1069;16747;61525;72258	1	1.27604	0.638022	0.269131	0.84421	0.844137	CCAGCATCTTCACTGAAAGG;CAAACTGTAATATTCGACAG;TGAAGGACGGTACCGACTAG;ATGTTTGTCAGTACGATGAG
RUNDC1	4	1070;42560;46345;75568	1	1.27565	0.637827	0.269242	0.844137	0.844137	TCTCCGTACACCAAAAACTC;CCTCGAAGACCTGAAAGGCG;CAGTACTCACAGGCTGCACG;AGCGGCCCGGTCATCAACCA
ESX1	4	1072;51469;69836;72826	1	1.27488	0.637439	0.269458	0.844391	0.844162	TGAATGGATACCACGCATCA;TTCTCACGGAAGTTCATCAG;AGCTGCTGAAACCAACCGAG;ACATAGTACCGCCGGCCCTG
NOP2	4	1073;10403;12418;50456	1	1.27449	0.637245	0.269568	0.844314	0.844162	AGACGACCACCACGACACTG;GGCCCCCATAAGCACTATTG;GCGGGTGGGACACACAGTTG;GAGCAACAGCCACTCCACTG
CLUAP1	4	1074;25808;72718;75819	1	1.2741	0.637051	0.269677	0.844234	0.844162	CGCCGGCACATAGGAGGGGT;AAGACGTCCACCTCGTCTGG;CCGGGCTGTGCAACAAGTGT;TCCTGACCCTAGCACCACGG
GNG3	4	1075;10988;16196;70718	1	1.27372	0.636858	0.269788	0.844162	0.844162	TCTGTGATTGATGAACAAGA;AGAGTAAGCAGGAAATTCAC;TGCAGAATCAATCTTCTACA;ATCCTCTGCCATCATTGCAC
[truncated: 4,286 more rows]
